# Supplementary material for: Metal-free radical trifluoromethylation of β-nitroalkenes through visible-light photoredox catalysis
Source: Royal Society of Chemistry journal article supplement (doi:10.1039/c7cc02589k), 2017-01-01
Supplement: c7cc02589k1.pdf [file c7cc02589k1.pdf]

## Supporting Information:

### Metal-Free Radical Trifluoromethylation of $\beta$ -Nitroalkenes through Visible-Light Photoredox Catalysis

Siba P. Midya,<sup>1,2</sup> Jagannath Rana,<sup>1,2</sup> Bhaskaran Aswin,<sup>1</sup> Thomas Abraham,<sup>1</sup> and Ekambaram  
Balaraman<sup>\*,1,2</sup>

<sup>1</sup>*Catalysis Division, Dr. Homi Bhabha Road, CSIR-National Chemical Laboratory (CSIR-NCL), Pune - 411008, India.*

<sup>2</sup>*Academy of Scientific and Innovative Research (AcSIR), New Delhi - 110025, India.*

#### Table of Contents

|     |                                                      |          |
|-----|------------------------------------------------------|----------|
| 1.  | General Information                                  | S2       |
| 2.  | Experimental Section                                 |          |
| 2.1 | Reaction Optimization                                | S3-S5    |
| 2.2 | Synthesis and Characterization of Starting Materials | S6-S12   |
| 2.3 | Synthesis and Characterization of Products           | S12-S19  |
| 2.4 | Mechanistic Studies                                  | S19-S23  |
| 3.  | References                                           | S23      |
| 4.  | NMR Spectra                                          | S25-S101 |

## 1. General Information

All catalytic experiments were carried out using standard Schlenk techniques. All solvents were reagent grade or better. Deuterated solvents were used as received. All non-deuterated solvents were dried according to standard procedure.<sup>S1</sup>All the reactions were performed in normal reaction tube received from the Fischer brand. Thin layer chromatography (TLC) was performed on Merck 1.05554 aluminum sheets precoated with silica gel 60 F254 and the spots visualized with UV light at 254 nm or under iodine. Column chromatography was performed with SiO<sub>2</sub> (SilicycleSiliaflash F60 (230-400 mesh)). <sup>1</sup>H and <sup>13</sup>C spectra were recorded on Bruker DRX-200 (200MHz), DRX-400 (400MHz) and DRX-500 (500MHz) spectrometers with tetramethylsilane or CHCl<sub>3</sub> as an internal standard. The peaks were internally referenced to TMS (0.00 ppm) or residual undeuterated solvent signal (7.27 ppm for <sup>1</sup>H NMR & 77.0 ppm for <sup>13</sup>C NMR). <sup>19</sup>F NMR spectra were recorded on DRX-400. Abbreviations used in the NMR follow-up experiments: br, broad; s, singlet; d, doublet; t, triplet; q, quartet; m, multiplet. GC analysis were carried out using a Carboxen 1000 column on a HP 690 series GC system or HP-5 cross linked 5% PH ME Siloxane column (30m × 0.32mm × 0.25 μm film thickness, FID) on a HP 6890 series GC system. GC-MS was carried out on HP 6890 (flame ionization detector and thermal conductivity detector) and HP 5973 (MS detector) instruments equipped with a 30 m column (Restek 5MS, 0.32 mm internal diameter) with a 5% phenylmethylsilicone coating (0.25 mm) and helium as carrier gas. Emission intensities were recorded using a Perkin Elmer LS50 Luminescence spectrometer and cyclic voltammetry experiments were performed in CH 660D Electrochemical work station (CH Instruments, USA).

## 2. Experimental Section

### 2.1 Reaction Optimization

**Table S1:** Screening of photoredox catalyst<sup>a</sup>

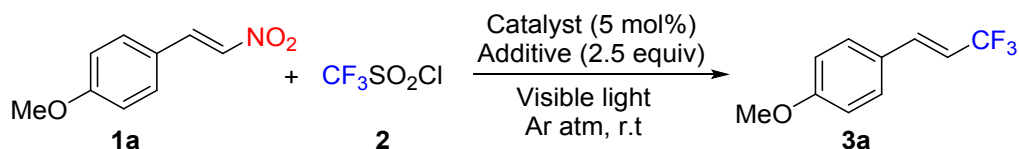

| Entry | Catalyst                              | Yield (%) <sup>b</sup> |
|-------|---------------------------------------|------------------------|
| 1     | $\text{Ru}(\text{bipy})_3\text{Cl}_2$ | 51                     |
| 2     | Eosin-Y                               | 74                     |
| 3     | Rose Bengal                           | 68                     |
| 4     | Rodamin-B                             | 36                     |
| 5     | Alizarine-S                           | 70                     |
| 6     | Fluorecene                            | 12                     |
| 7     | Na salt of Eosin-Y                    | NR                     |

<sup>a</sup> Reactions performed using **1a** (0.125 mmol),  $\text{CF}_3\text{SO}_2\text{Cl}$  (0.3 mmol), photoredox catalyst (5 mol%), additive  $\text{K}_2\text{HPO}_4$  (0.3 mmol), and  $\text{CH}_3\text{CN}$  (0.5 mL) for 32 h under argon atm at room temperature (Light source: 32-W compact fluorescent light). <sup>b</sup> Yield determined by GC using *m*-xylene as an internal standard. NR = No reaction.

**Table S2:** Screening of additive<sup>a</sup>

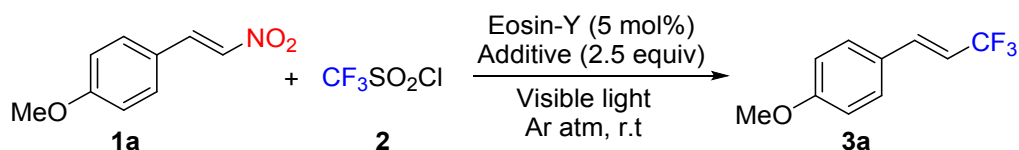

| Entry | Additive                  | Yield (%) <sup>b</sup> |
|-------|---------------------------|------------------------|
| 1     | $\text{KH}_2\text{PO}_4$  | 42                     |
| 2     | $\text{Na}_2\text{HPO}_4$ | trace                  |
| 3     | $\text{NaH}_2\text{PO}_4$ | 24                     |
| 4     | $\text{KHSO}_4$           | 31                     |
| 5     | $\text{NaHSO}_4$          | 21                     |

|   |                                 |    |
|---|---------------------------------|----|
| 6 | K <sub>3</sub> PO <sub>4</sub>  | NR |
| 7 | CsOAc                           | NR |
| 8 | K <sub>2</sub> HPO <sub>4</sub> | 74 |

<sup>a</sup> Reactions performed using **1a** (0.125 mmol), CF<sub>3</sub>SO<sub>2</sub>Cl (0.3 mmol), Eosin-Y (5 mol%), additive (0.3 mmol), and CH<sub>3</sub>CN (0.5 mL) for 32 h under argon atm at room temperature (Light source: 32-W compact fluorescent light). <sup>b</sup> Yield determined by GC using *m*-xylene as an internal standard. NR = No reaction.

**Table S3:** Screening of solvent<sup>a</sup>

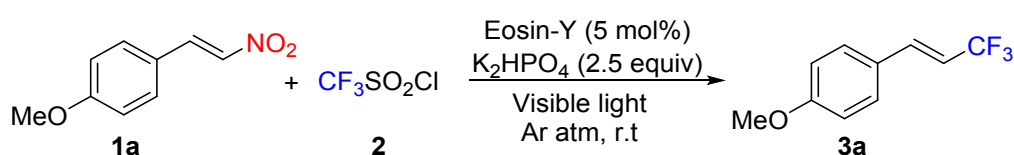

| Entry | Solvent            | Yield (%) <sup>b</sup> |
|-------|--------------------|------------------------|
| 1     | CH <sub>3</sub> CN | 74                     |
| 2     | MeOH               | 31                     |
| 3     | DCE                | 27                     |
| 4     | THF                | 39                     |
| 5     | DMF                | 0                      |
| 6     | Toluene            | NR                     |
| 7     | 1,4-Dioxane        | 47                     |
| 8     | Water              | NR                     |
| 9     | <i>o</i> -Xylene   | NR                     |
| 10    | Et <sub>2</sub> O  | 56                     |
| 11    | DMSO               | NR                     |

<sup>a</sup> Reactions performed using **1a** (0.125 mmol), CF<sub>3</sub>SO<sub>2</sub>Cl (0.3 mmol), Eosin-Y (5 mol%), K<sub>2</sub>HPO<sub>4</sub>(0.3 mmol), and solvent (0.5 mL) for 32 h under argon atm at room temperature (Light source: 32-W compact fluorescent light). <sup>b</sup> Yield determined by GC using *m*-xylene as an internal standard. NR = No reaction.

**Table S4:** Screening of CF<sub>3</sub> source<sup>a</sup>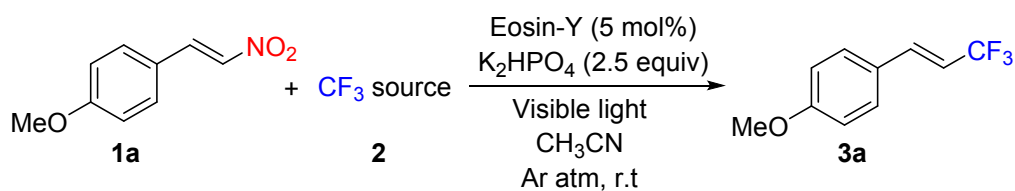

| Entry | CF <sub>3</sub> source              | Yield (%) <sup>b</sup> |
|-------|-------------------------------------|------------------------|
| 1     | CF <sub>3</sub> COOH                | NR                     |
| 2     | CF <sub>3</sub> SO <sub>2</sub> Cl  | 74                     |
| 3     | CF <sub>3</sub> SO <sub>2</sub> Na  | NR                     |
| 4     | CF <sub>3</sub> CO <sub>2</sub> Na  | NR                     |
| 5     | Togni's reagent                     | 26                     |
| 6     | (CF <sub>3</sub> CO) <sub>2</sub> O | NR                     |

<sup>a</sup> Reactions performed using **1a** (0.125 mmol), CF<sub>3</sub> source (0.3 mmol), Eosin-Y (5 mol%), K<sub>2</sub>HPO<sub>4</sub> (0.3 mmol), and CH<sub>3</sub>CN (0.5 mL) for 32 h under argon atm at room temperature (Light source: 32-W compact fluorescent light). <sup>b</sup> Yield determined by GC using *m*-xylene as an internal standard. NR = No reaction.

**Table S5:** Reaction Kinetics<sup>a,b</sup>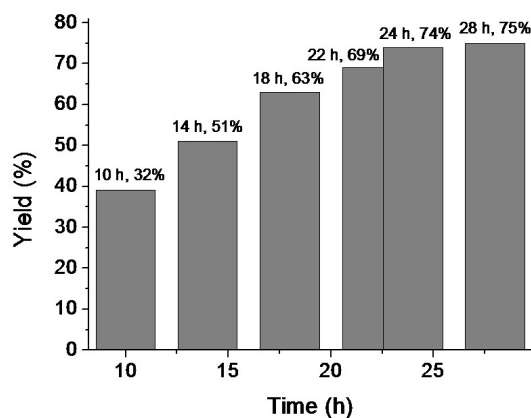**Figure S1.** Reaction profile for the formation of **3a**.

<sup>a</sup> Reactions performed using **1a** (0.125 mmol), CF<sub>3</sub> source (0.3 mmol), Eosin-Y (5 mol%), K<sub>2</sub>HPO<sub>4</sub> (0.3 mmol), and CH<sub>3</sub>CN (0.5 mL) for 32 h under argon atm at room temperature (Light source: 32-W compact fluorescent light). <sup>b</sup> Yield determined by GC using *m*-xylene as an internal standard. NR = No reaction.

## 2.2 Synthesis and characterization of starting materials

### i) Method-A: synthesis of $\beta$ -nitroalkene<sup>S2</sup>

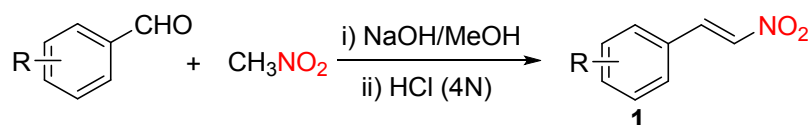

**Scheme S1.** Synthesis of  $\beta$ -nitroalkene.

A mixture of aromatic aldehyde (10mmol) and nitromethane (11 mmol) were dissolved 25 mL of methanol in a 100 mL round bottle flask and then the mixture was cooled to 0°C. Then, NaOH(11 mmol) was added into the reaction mixture and kept it stirring for 2 h. After the completion of the reaction, the mixture was neutralised by 4N HCl, which afforded yellow coloured solid. This was filtered by a sintered funnel and washed with cold methanol to get a crude yellow, amorphous solid. Recrystallization in methanol (after 1 day) then gave analytically pure sample of  $\beta$ -nitro alkene derivative.

### (*E*)-1-methoxy-4-(2-nitrovinyl)benzene (**1a**)<sup>S2</sup>

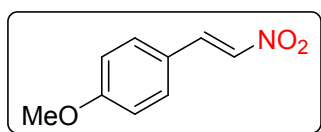

Compound **1a** was prepared according to the general procedure as described above (Method A) using 4-methoxy benzaldehyde. Yellow solid. Yield: 88%. <sup>1</sup>H NMR (500 MHz, Chloroform-d)  $\delta$  7.93 (d,  $J$  = 13.7 Hz, 1H), 7.51-7.47 (m, 3H), 6.91 (d,  $J$  = 7.6 Hz, 2H), 3.84 (s, 3H). <sup>13</sup>C NMR (125.8 MHz, Chloroform-d)  $\delta$  162.80, 138.96, 134.76, 131.07, 122.32, 114.74, 55.36.

### (*E*)-1-methyl-4-(2-nitrovinyl)benzene (**1b**)<sup>S2</sup>

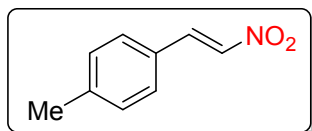

Compound **1b** was prepared according to the general procedure as described above (Method A) using 4-methyl benzaldehyde. Yellow solid. Yield: 82%. <sup>1</sup>H NMR (500 MHz, Chloroform-d)  $\delta$  8.0 (d,  $J$  = 13.7 Hz, 1H), 7.59 (d,  $J$  = 13.7 Hz, 1H), 7.46 (d,  $J$  = 7.6 Hz, 2H), 7.28 (d,  $J$  = 7.6 Hz, 2H), 2.43 (s, 3H). <sup>13</sup>C NMR (125.8 MHz, Chloroform-d)  $\delta$  143.07, 139.13, 136.24, 130.10, 129.15, 127.23, 21.60.

**(E)-methyl(4-(2-nitrovinyl)phenyl)sulfane (1c)**<sup>S3</sup>

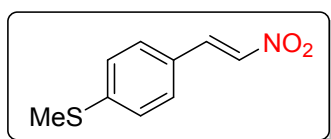

Compound **1c** was prepared according to the general procedure as described above (Method A) using 4-thiomethyl benzaldehyde. Yellow solid. Yield: 79%. <sup>1</sup>H NMR (200 MHz, Chloroform-d)  $\delta$  7.97 (d,  $J$  = 13.6 Hz, 1H), 7.57 (d,  $J$  = 13.6 Hz, 1H), 7.46 (d,  $J$  = 8.5 Hz, 2H), 7.26 (d,  $J$  = 8.6 Hz, 2H). <sup>13</sup>C NMR (50.3 MHz, Chloroform-d)  $\delta$  145.08, 138.68, 135.96, 129.39, 126.07, 125.81, 14.74.

**(E)-(2-nitrovinyl)benzene (1d)**<sup>S2</sup>

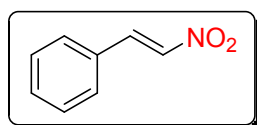

Compound **1d** was prepared according to the general procedure as described above (Method A) using benzaldehyde. Yellow solid. Yield: 82%. <sup>1</sup>H NMR (200 MHz, Chloroform-d)  $\delta$  8.02 (d,  $J$  = 13.6 Hz, 1H), 7.60 (d,  $J$  = 13.6 Hz, 1H), 7.59 - 7.52 (m, 2H), 7.51 - 7.41 (m, 3H). <sup>13</sup>C NMR (50.3 MHz, Chloroform-d)  $\delta$  139.00, 137.05, 132.08, 130.01, 129.33, 129.09.

**(E)-1-fluoro-4-(2-nitrovinyl)benzene (1e)**

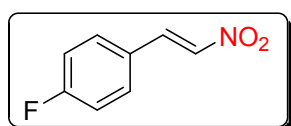

Compound **1e** was prepared according to the general procedure as described above (Method A) using 4-fluoro benzaldehyde. Yellow solid. Yield: 83%. <sup>1</sup>H NMR (500 MHz, Chloroform-d)  $\delta$  7.99 (d,  $J$  = 13.7 Hz, 1H), 7.59-7.56 (m, 2H), 7.54 (d,  $J$  = 13.4 Hz, 1H), 7.16 (t,  $J$  = 8.2 Hz, 2H). <sup>13</sup>C NMR (125.8 MHz, Chloroform-d)  $\delta$  164.82 (d,  $J_{C-F}$  = 254.6 Hz), 137.80, 136.79, 131.25 (d,  $J_{C-F}$  = 8.6 Hz), 126.28, 116.71 (d,  $J_{C-F}$  = 22.9 Hz).

**(E)-1-chloro-4-(2-nitrovinyl)benzene (1f)**<sup>S2</sup>

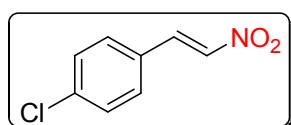

Compound **1g** was prepared according to the general procedure as described above (Method A) using 4-chloro benzaldehyde. Yellow solid. Yield: 76%.  $^1\text{H NMR}$  (500 MHz, Chloroform-d)  $\delta$  7.97 (d,  $J = 13.7$  Hz, 1H), 7.57 (d,  $J = 13.4$  Hz, 1H), 7.50 (d,  $J = 8.5$  Hz, 2H), 7.44 (d,  $J = 8.2$  Hz, 2H).  $^{13}\text{C NMR}$  (125.8 MHz, Chloroform-d)  $\delta$  138.32, 137.66, 137.39, 130.24, 129.75, 128.50.

**(E)-4-(2-nitrovinyl)biphenyl (1g)**

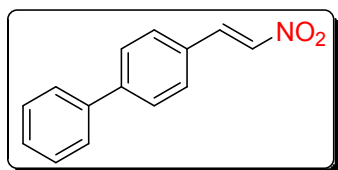

Compound **1h** was prepared according to the general procedure as described above (Method A) using 4-phenyl benzaldehyde. Yellow solid. Yield: 63%.  $^1\text{H NMR}$  (500 MHz, Chloroform-d)  $\delta$  8.06 (d,  $J = 13.3$  Hz, 1H), 7.71 - 7.69 (m, 2H), 7.66 - 7.63 (m, 5H), 7.49 (t,  $J = 7.6$  Hz, 2H), 7.42 (t,  $J = 7.6$  Hz, 1H).  $^{13}\text{C NMR}$  (125.8 MHz, Chloroform-d)  $\delta$  144.96, 139.54, 138.67, 136.86, 129.67, 129.01, 128.91, 128.35, 127.95, 127.08.

**(E)-1-methyl-3-(2-nitrovinyl)benzene (1i)**

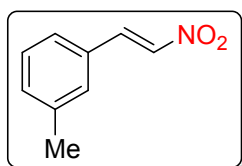

Compound **1j** was prepared according to the general procedure as described above (Method A) using 3-methyl benzaldehyde. Yellow solid. Yield: 74%.  $^1\text{H NMR}$  (500 MHz, Chloroform-d)  $\delta$  7.98 (d,  $J = 13.7$  Hz, 1H), 7.58 (d,  $J = 13.7$  Hz, 1H), 7.37 - 7.35 (m, 2H), 7.35 (s, 1H), 7.33 - 7.31 (m, 1H), 2.40 (s, 3H).  $^{13}\text{C NMR}$  (125.8 MHz, Chloroform-d)  $\delta$  139.21, 139.17, 136.86, 132.97, 129.94, 129.66, 129.20, 126.32, 21.19.



**(E)-1-methoxy-3-(2-nitrovinyl)benzene (1j)**

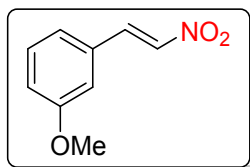

Compound **1j** was prepared according to the general procedure as described above (Method A) using 3-methoxy benzaldehyde. Yellow solid. Yield: 87%. <sup>1</sup>H NMR (500 MHz, Chloroform-d) δ 7.95 (d, *J* = 13.4 Hz, 1H), 7.56 (d, *J* = 13.4 Hz, 1H), 7.36 (t, *J* = 7.6 Hz, 1H), 7.14 (d, *J* = 7.3 Hz, 1H), 7.06 - 7.02 (m, 2H), 3.85 (s, 3H). <sup>13</sup>C NMR (125.8 MHz, Chloroform-d) δ 160.4, 138.96, 137.24, 131.24, 130.34, 121.67, 117.87, 113.92, 55.33.

**(E)-1-chloro-3-(2-nitrovinyl)benzene (1k)**

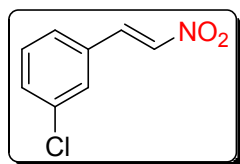

Compound **1k** was prepared according to the general procedure as described above (Method A) using 3-chloro benzaldehyde. Yellow solid. Yield: 86%. <sup>1</sup>H NMR (500 MHz, Chloroform-d) δ 7.93 (d, *J* = 13.7 Hz, 1H), 7.57 (d, *J* = 13.7 Hz, 1H), 7.46 (t, *J* = 7.6 Hz, 1H), 7.43 - 7.39 (m, 2H). <sup>13</sup>C NMR (125.8 MHz, Chloroform-d) δ 138.05, 137.37, 135.38, 131.78, 130.59, 128.69, 127.19.

**(E)-2-bromo-1-fluoro-4-(2-nitrovinyl)benzene (1l)**

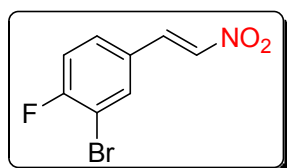

Compound **1l** was prepared according to the general procedure as described above (Method A) using 3-bromo 4-fluoro benzaldehyde. Light yellow solid. Yield: 70%. <sup>1</sup>H NMR (500 MHz, Chloroform-d) δ 7.91 (d, *J* = 13.7 Hz, 1H), 7.78 (dd, *J* = 6.4, 1.8 Hz, 1H), 7.53 (d, *J* = 13.7 Hz, 1H), 7.53 - 7.50 (m, 1H), 7.22 (t, *J* = 8.2 Hz, 1H). <sup>13</sup>C NMR (125.8 MHz, Chloroform-d) δ 160.94 (d, *J*<sub>C-F</sub> = 255.6 Hz), 137.65, 136.36, 134.10, 129.91 (d, *J*<sub>C-F</sub> = 7.6 Hz), 127.73, 117.54 (d, *J*<sub>C-F</sub> = 22.9 Hz), 110.34 (d, *J*<sub>C-F</sub> = 21.9 Hz).

**(E)-1,2-dimethoxy-4-(2-nitrovinyl)benzene (1m)**

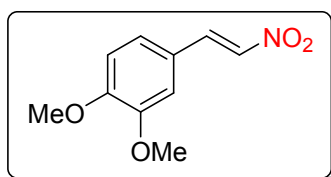

Compound **1m** was prepared according to the general procedure as described above (Method A) using 3,4-dimethoxy benzaldehyde. Yellow solid. Yield: 88%. <sup>1</sup>H NMR (500 MHz, Chloroform-d) δ 7.94 (d, *J* = 13.4 Hz, 1H), 7.52 (d, *J* = 13.4 Hz, 1H), 7.16 (d, *J* = 8.2 Hz, 1H), 7.00 (s, 1H), 6.90 (d, *J* = 8.2 Hz, 1H), 3.92 (s, 3H), 3.91 (s, 1H). <sup>13</sup>C NMR (125.8 MHz, Chloroform-d) δ 152.71, 149.45, 139.24, 135.05, 124.56, 122.70, 111.25, 110.18, 55.97, 55.90.

**(E)-2-(2-nitrovinyl)naphthalene (1n)**

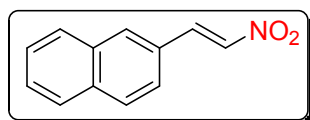

Compound **1n** was prepared according to the general procedure as described above (Method A) using 2-naphthaldehyde. Yellow solid. Yield: 68%. <sup>1</sup>H NMR (500 MHz, Chloroform-d) δ 8.16 (d, *J* = 13.4 Hz, 1H), 8.02 (s, 1H), 7.91 - 7.87 (m, 3H), 7.70 (d, *J* = 13.7 Hz, 1H), 7.62 - 7.56 (m, 3H). <sup>13</sup>C NMR (125.8 MHz, Chloroform-d) δ 139.20, 137.10, 134.87, 133.10, 132.25, 129.33, 128.80, 128.35, 127.91, 127.50, 127.25, 123.28.

**(E)-2-methoxy-1-(2-nitrovinyl)naphthalene (1o)**

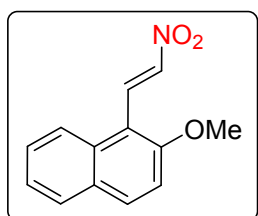

Compound **1p** was prepared according to the general procedure as described above (Method A) using 2-methoxy 1-naphthaldehyde. Yellow solid. Yield: 55%. <sup>1</sup>H NMR (500 MHz, Chloroform-d) δ 8.83 (d, *J* = 13.3 Hz, 1H), 8.16 (d, *J* = 8.8 Hz, 1H), 8.14 (d, *J* = 13.3 Hz,

1H), 7.98 (d,  $J = 9.2$  Hz, 1H), 7.83 (d,  $J = 8.0$  Hz, 1H), 7.61 (t,  $J = 7.6$  Hz, 1H), 7.44 (d,  $J = 7.6$  Hz, 1H), 7.31 (d,  $J = 9.2$  Hz, 1H), 4.09 (s, 3H).  $^{13}\text{C}$  NMR (125.8 MHz, Chloroform-d)  $\delta$  158.90, 140.07, 134.35, 133.29, 130.78, 128.99, 128.42, 124.40, 122.10, 112.16, 111.50, 56.21.

**(E)-2-methoxy-6-(2-nitrovinyl)naphthalene (1p)**

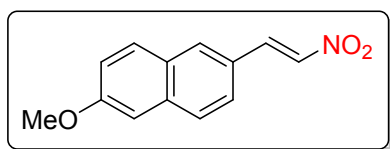

Compound **1q** was prepared according to the general procedure as described above (Method A) using 6-methoxy 2-napthaldehyde. Yellow solid. Yield: 78%.  $^1\text{H}$  NMR (200 MHz, Chloroform-d)  $\delta$  8.14 (d,  $J = 13.6$  Hz, 1H), 7.93 (s, 1H), 7.78 (dd,  $J = 8.8, 4.7$  Hz, 2H), 7.67 (d,  $J = 13.6$  Hz, 1H), 7.56 (dd,  $J = 8.6, 1.6$  Hz, 1H), 7.22 (dd,  $J = 8.8, 2.5$  Hz, 1H), 7.16 (s, 1H), 3.96 (s, 3H).  $^{13}\text{C}$  NMR (50.3 MHz, Chloroform-d)  $\delta$ . 159.71, 139.56, 136.61, 136.13, 132.14, 130.42, 128.50, 128.06, 125.25, 124.04, 120.04, 106.10, 55.45.

**(E)-2-(2-nitrovinyl)-4-phenylthiophene (1r)**

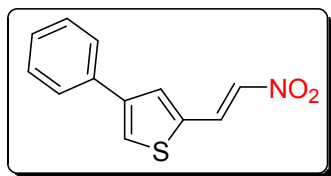

Compound **1s** was prepared according to the general procedure as described above (Method A) using 4-phenyl thiophene aldehyde. Yellow solid. Yield: 59%.  $^1\text{H}$  NMR (400 MHz, Chloroform-d)  $\delta$  8.17 (d,  $J=13.8$  Hz, 1H), 7.69 (s, 1H), 7.65 (s, 1H), 7.55 - 7.60 (m, 2H), 7.51 (d,  $J=13.3$  Hz, 1H), 7.42 - 7.48 (m, 2H), 7.34 - 7.40 (m, 1H).  $^{13}\text{C}$  NMR (100.5 MHz, Chloroform-d)  $\delta$  144.06, 135.49, 134.26, 134.13, 133.14, 131.99, 129.04, 128.07, 126.25, 126.06.

**(E)-(3-nitroallyl)benzene (1s)**

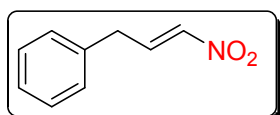

Compound **1u** was prepared according to the general procedure as described above (Method A) using phenylacetaldehyde. Yellow liquid. Yield: 76%. <sup>1</sup>H NMR (500 MHz, Chloroform-d) δ 7.40 - 7.48 (m, 1 H), 7.37 (t, *J*=7.4 Hz, 2H), 7.31 (t, *J*=7.2 Hz, 1H), 7.20 (d, *J*= 7.3 Hz, 2H), 6.93 (d, *J*=13.3 Hz, 1H), 3.60 (d, *J* = 6.0 Hz, 2H). <sup>13</sup>C NMR (125.8 MHz, Chloroform-d) δ 141.03, 140.32, 135.66, 129.01, 128.70, 127.35, 34.57.

### (*E*)-1-nitrooct-1-ene (**1t**)

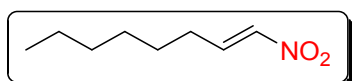

Compound **1v** was prepared according to the general procedure as described above (Method A) using heptaldehyde. Light yellow liquid. Yield: 72%. <sup>1</sup>H NMR (200 MHz, Chloroform-d) δ 4.21 - 4.52 (m, 2H), 1.46 - 1.64 (m, 2H), 1.29 (br. s., 8H), 0.79 - 0.98 (m, 3H). <sup>13</sup>C NMR (50.3 MHz, Chloroform-d) δ 80.64, 68.67, 33.68, 31.58, 28.93, 25.09, 22.49, 13.99.

## 2.3 Synthesis and Characterization of Products

### Synthesis of 1-trifluoromethylalkenes: Visible-light metal-free photoredox catalysis

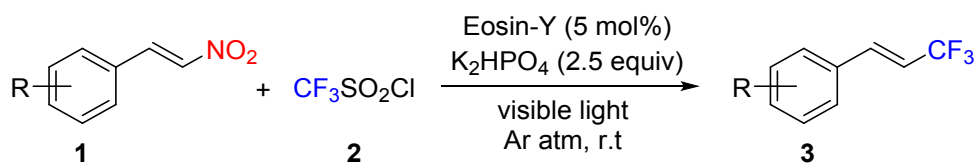

**Scheme S2.** Synthesis of 1-trifluoromethylalkenes **3**.

#### (a) Experimental procedure:

To a 10 mL clean, oven-dried screw cap reaction tube was added eosin-Y (0.0125 mmol, 5 mol%), K<sub>2</sub>HPO<sub>4</sub> (0.625 mmol, 2.5 equiv), β-nitroalkene **1** (0.25 mmol), CF<sub>3</sub>SO<sub>2</sub>Cl (0.625 mmol, 2.5 equiv), and CH<sub>3</sub>CN (1 mL) under inert atm. The reaction mixture was kept for stirring at room temperature with 32W compact fluorescent light bulb for 32 h. Then, the reaction mixture was diluted with water (4 mL) and extracted with diethyl ether (3 x 5 mL). The resultant organic layer was dried over anhydrous Na<sub>2</sub>SO<sub>4</sub> and the solvent was evaporated under reduced pressure. The crude mixture was purified by silica gel column chromatography (230-400 mesh size) using petroleum-ether/ethyl acetate as an eluting system.

## (b) Gram-scale synthesis:

To a 25 mL clean, oven-dried screw cap reaction tube was added eosin-Y (0.185 mmol, 5 mol%),  $K_2HPO_4$  (2.5 equiv),  $\beta$ -nitroalkene **1b** or **1g** (3.7 mmol),  $CF_3SO_2Cl$  (9.24 mmol, 2.5 equiv), and  $CH_3CN$  (5 mL) under inert atm. The reaction mixture was kept for stirring at room temperature with 32-W compact fluorescent light bulb for 32 h. Then, the reaction mixture was diluted with water (4 mL) and extracted with diethyl ether (3 x 5 mL). The resultant organic layer was dried over anhydrous  $Na_2SO_4$  and the solvent was evaporated under reduced pressure. The crude mixture was purified by silica gel column chromatography (230-400 mesh size) using petroleum-ether/ethyl acetate as an eluting system and gave the desired product (product **3b** in 51% and product **3g** in 65%).

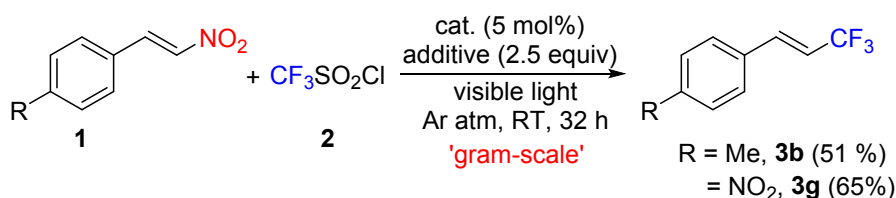

- If starting material is remaining, add additional quantities of  $CF_3$  source and continue the visible-light irradiation.
- Solvent dilution is the most important factor.
- Sometimes higher yields were observed when recrystallized eosin-Y (thrice from ethanol) was used.
- Reaction should be conducted strictly under an inert atmosphere of argon for better performance.

## (c) Characterization of Products:

### (*E*)-1-methoxy-4-(3,3,3-trifluoroprop-1-enyl)benzene (**3a**)

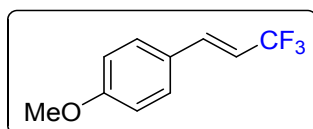

Colorless oil. Yield: 74%.  $^1H$  NMR (500 MHz, Chloroform-*d*)  $\delta$  7.41 (d,  $J = 8.5$  Hz, 2H), 7.10 (qd,  $J = 16.2, 1.8$  Hz, 1H), 6.92 (d,  $J = 8.8$  Hz, 2H), 6.07 (qd,  $J = 16.0, 6.6$  Hz, 1H), 3.85 (s, 3H).  $^{13}C$  NMR (125.8 MHz, Chloroform-*d*)  $\delta$  161.02, 137.08 (q,  $J = 6.8$  Hz), 129.01, 126.06, 123.89 (q,  $J = 268.4$  Hz), 114.30, 113.44 (q,  $J = 33.7$  Hz), 55.36.  $^{19}F$  NMR (376.5

MHz, Chloroform-d)  $\delta$  -62.84. (Known compound: Iqbal, N.; Jung, J.; Park, S.; Cho, E. J. *Angew. Chem. Int. Ed.* **2014**, *53*, 539).

**(E)-1-methyl-4-(3,3,3-trifluoroprop-1-enyl)benzene (3b)**

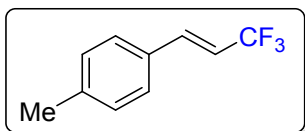

Colorless oil. Yield: 71%.  $^1\text{H NMR}$  (400 MHz, Chloroform-d)  $\delta$  7.36 (d,  $J = 7.9$  Hz, 2H), 7.21 (d,  $J = 8.1$  Hz, 2H), 7.13 (qd,  $J = 16.1, 2.2$  Hz, 1H), 6.16 (qd,  $J = 16.1, 6.6$  Hz, 1H), 2.39 (s, 3H).  $^{13}\text{C NMR}$  (100.6 MHz, Chloroform-d)  $\delta$  140.28, 137.53 (q,  $J = 6.9$  Hz), 130.65, 129.61, 127.46, 123.64 (q,  $J = 268.9$  Hz), 114.76 (q,  $J = 33.9$  Hz), 21.35.  $^{19}\text{F NMR}$  (376.5 MHz, Chloroform-d)  $\delta$  -62.84. (Known compound: Iqbal, N.; Jung, J.; Park, S.; Cho, E. J. *Angew. Chem. Int. Ed.* **2014**, *53*, 539).

**(E)-methyl(4-(3,3,3-trifluoroprop-1-enyl)phenyl)sulfane (3c)**

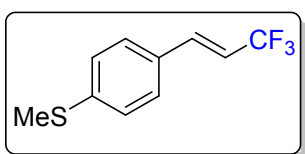

Colorless oil. Yield: 73%.  $^1\text{H NMR}$  (500 MHz, Chloroform-d)  $\delta$  7.37 (d,  $J = 8.5$  Hz, 2H), 7.25 (d,  $J = 8.5$  Hz, 2H), 7.10 (qd,  $J = 16.2, 2.1$  Hz, 1H), 6.16 (qd,  $J = 16.2, 6.4$  Hz, 1H), 2.51 (s, 3H).  $^{13}\text{C NMR}$  (125.8 MHz, Chloroform-d)  $\delta$  141.44, 137.01 (q,  $J = 7.6$  Hz), 129.95, 127.86, 126.16, 123.68 (q,  $J = 265.2$  Hz), 114.89 (q,  $J = 33.4$ ), 15.25.  $^{19}\text{F NMR}$  (376.5 MHz, Chloroform-d)  $\delta$  -63.09. (Known compound: Omote, M.; Tanaka, M.; Ikeda, A.; Nomura, S.; Tarui, A.; Sato, K.; Ando, A. *Org. Lett.*, **2012**, *14*, 9).

**(E)-(3,3,3-trifluoroprop-1-enyl)benzene (3d)**

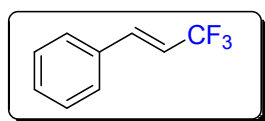

Colorless oil. Yield: 68%.  $^1\text{H NMR}$  (400 MHz, Chloroform-d)  $\delta$  7.48 - 7.36 (m, 5H), 7.17 (qd,  $J = 16.2, 2.1$  Hz, 1H), 6.22 (qd,  $J = 16.0, 6.6$  Hz, 1H).  $^{19}\text{F NMR}$  (376.5 MHz,

Chloroform-d)  $\delta$  -63.34. (Known compound: Ma, J. -J.; Yi, W. -B.; Lu, G. -P.; Cai, C. *Adv. Synth. Catal.* **2015**, 357, 3447).

**(E)-1-fluoro-4-(3,3,3-trifluoroprop-1-enyl)benzene (3e)**

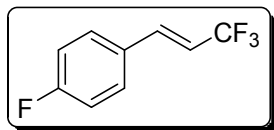

Colorless oil. Yield: 70%.  $^1\text{H NMR}$  (200 MHz, Chloroform-d)  $\delta$  7.46 - 7.38 (m, 4H), 7.17 (qd,  $J = 16.2, 2.1$  Hz, 1H), 6.22 (qd,  $J = 16.2, 6.6$  Hz, 1H).  $^{19}\text{F NMR}$  (376.5 MHz, Chloroform-d)  $\delta$  -63.32, -110.25. (Known compound: Ma, J. -J.; Yi, W. -B.; Lu, G. -P.; Cai, C. *Adv. Synth. Catal.* **2015**, 357, 3447).

**(E)-1-chloro-4-(3,3,3-trifluoroprop-1-enyl)benzene (3f)**

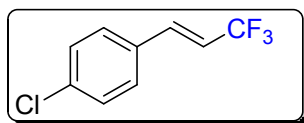

Colorless oil. Yield: 63%.  $^1\text{H NMR}$  (200 MHz, Chloroform-d)  $\delta$  7.43 - 7.34 (m, 4H), 7.12 (qd,  $J = 16.2, 2.1$  Hz, 1H), 6.19 (qd,  $J = 16.2, 6.4$  Hz, 1H).  $^{19}\text{F NMR}$  (376.5 MHz, Chloroform-d)  $\delta$  -63.44. (Known compound: Ma, J. -J.; Yi, W. -B.; Lu, G. -P.; Cai, C. *Adv. Synth. Catal.* **2015**, 357, 3447).

**(E)-4-(3,3,3-trifluoroprop-1-enyl)biphenyl (3g)**

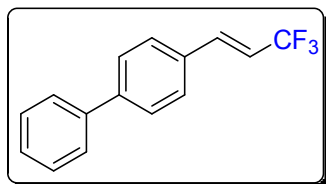

White solid. Yield: 69%.  $^1\text{H NMR}$  (500 MHz, Chloroform-d)  $\delta$  7.64 (t,  $J=8.8$  Hz, 4H), 7.54 (d,  $J=8.0$  Hz, 2H), 7.48 (t,  $J=7.6$  Hz, 2H), 7.36 - 7.43 (m, 1H) 7.21 (dd,  $J=16.0, 1.9$  Hz, 1H) 6.26 (dq,  $J= 16.16, 6.56$  Hz, 1H).  $^{13}\text{C NMR}$  (125.8 MHz, Chloroform-d)  $\delta$  142.82, 140.10, 137.21 (q,  $J = 6.7$  Hz), 132.34, 128.90, 128.00, 127.84, 127.57, 127.04, 124.73, 122.59, 115.73 (q,  $J = 33.4$  Hz).  $^{19}\text{F NMR}$  (376.5 MHz, Chloroform-d)  $\delta$  -63.19. (Known compound:

Omote, M.; Tanaka, M.; Ikeda, A.; Nomura, S.; Tarui, A.; Sato, K.; Ando, A. *Org. Lett.*, **2012**, *14*, 9)

**(E)-1-nitro-4-(3,3,3-trifluoroprop-1-enyl)benzene (3h)**

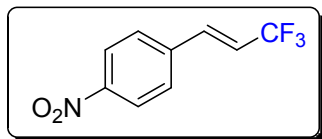

Yellow solid. Yield: 81%. <sup>1</sup>H NMR (400 MHz, Chloroform-d) δ 8.82 (d, *J* = 8.7 Hz, 2H), 7.64 (d, *J* = 8.7 Hz, 2H), 7.24 (qd, *J* = 16.5, 1.8 Hz, 1H), 6.37 (qd, *J* = 16.0, 6.4 Hz, 1H). <sup>19</sup>F NMR (376.5 MHz, Chloroform-d) δ -63.97. (Known compound: Ma, J. -J.; Yi, W. -B.; Lu, G. -P.; Cai, C. *Adv. Synth. Catal.* **2015**, *357*, 3447).

**(E)-1-methyl-3-(3,3,3-trifluoroprop-1-enyl)benzene (3i)**

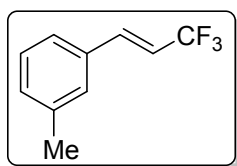

Colorless oil. Yield: 60%. <sup>1</sup>H NMR (200 MHz, Chloroform-d) δ 7.26 - 7.22 (m, 3H), 7.17 (d, *J* = 6.2 Hz, 1H), 7.11 (qd, *J* = 16.2, 2.2 Hz, 1H), 6.20 (qd, *J* = 16.1, 6.4 Hz, 1H), 2.38 (s, 3H). <sup>19</sup>F NMR (376.5 MHz, Chloroform-d) δ -63.27. (Known compound: Ma, J. -J.; Yi, W. -B.; Lu, G. -P.; Cai, C. *Adv. Synth. Catal.* **2015**, *357*, 3447).

**(E)-1-methoxy-3-(3,3,3-trifluoroprop-1-enyl)benzene (3j)**

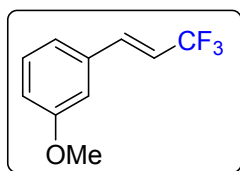

Colorless oil. Yield: 63%. <sup>1</sup>H NMR (200 MHz, Chloroform-d) δ 7.32 (t, *J* = 7.4 Hz, 1H), 7.14 (qd, *J* = 16.0, 1.2 Hz, 1H), 7.06 (d, *J* = 7.5 Hz, 1H), 6.98 (s, 1H), 6.95 (d, *J* = 8.2 Hz, 1H), 6.21 (qd, *J* = 16.1, 6.4 Hz, 1H), 3.85 (s, 3H). <sup>19</sup>F NMR (376.5 MHz, Chloroform-d) δ -63.33. (Known compound: Ma, J. -J.; Yi, W. -B.; Lu, G. -P.; Cai, C. *Adv. Synth. Catal.* **2015**, *357*, 3447).



**(E)-1-chloro-3-(3,3,3-trifluoroprop-1-enyl)benzene (3k)**

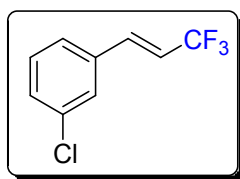

Colorless oil. Yield: 67%.  $^1\text{H NMR}$  (200 MHz, Chloroform-d)  $\delta$  7.48 (s, 1H), 7.39 - 7.32 (m, 3H), 7.11 (dq,  $J = 16.4, 2.1$  Hz, 1H), 6.22 (dq,  $J = 16.0, 6.4$  Hz, 1H).  $^{19}\text{F NMR}$  (376.5 MHz, Chloroform-d)  $\delta$  -63.61. (Known compound: Ma, J. -J.; Yi, W. -B.; Lu, G. -P.; Cai, C. *Adv. Synth. Catal.* **2015**, 357, 3447 - 3452)

**(E)-2-bromo-1-fluoro-4-(3,3,3-trifluoroprop-1-enyl)benzene (3l)**

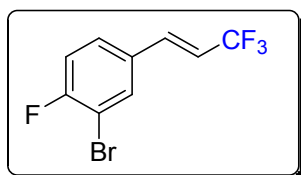

Colorless oil. Yield: 66%.  $^1\text{H NMR}$  (500 MHz, Chloroform-d)  $\delta$  7.68 (dd,  $J = 6.4, 2.1$  Hz, 1H), 7.40 - 7.37 (m, 1H), 7.16 (t,  $J = 8.5$  Hz, 1H), 7.07 (qd,  $J = 16.2, 2.1$  Hz, 1H), 6.16 (qd,  $J = 16.2, 6.4$  Hz, 1H).  $^{13}\text{C NMR}$  (125.8 MHz, Chloroform-d)  $\delta$  159.87 (d,  $J = 251.8$  Hz), 135.23 (q,  $J = 6.7$  Hz), 132.55, 131.00, 128.21 (d,  $J = 7.6$  Hz), 122.10, 117.01 (q,  $J = 22.9$  Hz), 109.84 (d,  $J = 21.94$  Hz).  $^{19}\text{F NMR}$  (376.5 MHz, Chloroform-d)  $\delta$  -63.56, -104.55.

**(E)-1,2-dimethoxy-4-(3,3,3-trifluoroprop-1-enyl)benzene (3m)**

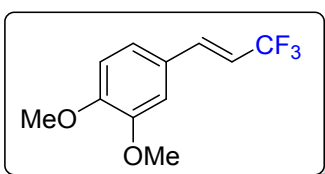

Colorless oil. Yield: 69%.  $^1\text{H NMR}$  (500 MHz, Chloroform-d)  $\delta$  7.09 (d,  $J = 15.9$  Hz, 1H), 7.03 (d,  $J = 7.9$  Hz, 1H), 6.97 (s, 1H), 6.88 (d,  $J = 8.2$  Hz, 1H), 6.08 (qd,  $J = 16.2, 7.9$  Hz, 1H), 3.93 (s, 3H), 3.92 (s, 3H).  $^{13}\text{C NMR}$  (125.8 MHz, Chloroform-d)  $\delta$  150.76, 149.27, 137.40 (q,  $J = 6.7$  Hz), 126.35, 121.62, 113.68 (q,  $J = 33.3$  Hz), 111.09, 109.36, 55.97, 55.94.  $^{19}\text{F NMR}$  (376.5 MHz, Chloroform-d)  $\delta$  -62.82. (Known compound: Xu, P.; Abdukader, A.; Hu, K.; Cheng, Y.; Zhu, C. *Chem. Commun.*, **2014**, 50, 2308-2310).

**(E)-2-(3,3,3-trifluoroprop-1-enyl)naphthalene (3n)**

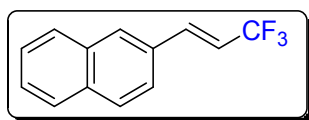

Colorless oil. Yield: 60%.  $^1\text{H NMR}$  (500 MHz, Chloroform-d)  $\delta$  7.88 - 7.84 (m, 4H), 7.61 (dd,  $J$  = 8.5, 1.8 Hz, 1H), 7.55 - 7.52 (m, 2H), 7.33 (qd,  $J$  = 16.2, 2.1 Hz, 1H), 6.33 (qd,  $J$  = 16.2, 6.4 Hz, 1H).  $^{13}\text{C NMR}$  (125.8 MHz, Chloroform-d)  $\delta$  137.73 (q,  $J$  = 6.7 Hz), 134.02, 133.25, 130.84, 129.10, 128.80, 128.41, 127.80, 127.17, 126.80, 124.79, 123.13, 115.95 (q,  $J$  = 33.4 Hz).  $^{19}\text{F NMR}$  (376.5 MHz, Chloroform-d)  $\delta$  -62.82. (Known compound: Kathiravan, S.; Nicholls, I. A. *Org. Lett.*, **2015**, *17*, 1874 - 1877).

**(E)-2-methoxy-1-(3,3,3-trifluoroprop-1-enyl)naphthalene (3o)**

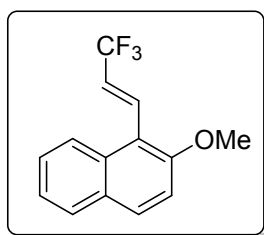

Pale yellow oil. Yield: 59%.  $^1\text{H NMR}$  (500 MHz, Chloroform-d)  $\delta$  8.08 (d,  $J$  = 8.5 Hz, 1H), 7.88 (d,  $J$  = 9.2 Hz, 1H), 7.82 (d,  $J$  = 8.2 Hz, 1H), 7.72 (qd,  $J$  = 16.2, 2.1 Hz, 1H), 7.54 (t,  $J$  = 7.6 Hz, 1H), 7.40 (t,  $J$  = 7.3 Hz, 1H), 7.32 (d,  $J$  = 8.8 Hz, 1H), 6.56 (qd,  $J$  = 16.5, 6.7 Hz, 1H), 4.02 (s, 3H).  $^{13}\text{C NMR}$  (125.8 MHz, Chloroform-d)  $\delta$  156.97, 132.43, 131.21, 130.32 (q,  $J$  = 7.6 Hz), 128.92, 128.64, 127.43, 123.87, 122.82, 121.20 (q,  $J$  = 33.38 Hz), 112.76, 56.23.  $^{19}\text{F NMR}$  (376.5 MHz, Chloroform-d)  $\delta$  -63.53.

**(E)-2-methoxy-6-(3,3,3-trifluoroprop-1-enyl)naphthalene (3p)**

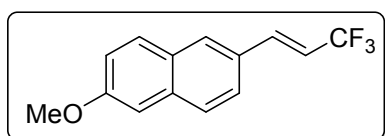

Light yellow oil. Yield: 64%.  $^1\text{H NMR}$  (500 MHz, Chloroform-d)  $\delta$  7.80 (s, 1H), 7.77 - 7.74 (m, 2H), 7.57 (d,  $J$  = 8.8 Hz, 1H), 7.29 (qd,  $J$  = 15.64, 1.9 Hz, 1H), 7.19 (d,  $J$  = 9.2 Hz, 1H), 7.15 (s, 1H), 6.28 (qd,  $J$  = 16.0, 6.5 Hz, 1H), 3.95 (s, 3H).  $^{19}\text{F NMR}$  (376.5 MHz,

Chloroform-d)  $\delta$  -62.96. (Known compound: Lin, H.; Dong, X.; Li, X.; Shen, Q.; Lu, L. *Eur. J. Org. Chem.* **2012**, 4675 - 4679).

### (E)-2-(3,3,3-trifluoroprop-1-en-1-yl)thiophene (3q)

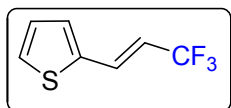

Colorless oil. Yield: 66%.  $^1\text{H NMR}$  (300 MHz, Chloroform-d):  $\delta$  7.34 (d,  $J$  = 5.1 Hz, 1H), 7.26 (dq,  $J$  = 2.1, 15.9 Hz, 1H) 7.19 (d,  $J$  = 3.6 Hz, 1H), 7.03(dd,  $J$  = 3.8, 5.0Hz, 1H), 6.01 (dq,  $J$  = 6.6, 15.9 Hz, 1H);  $^{19}\text{F NMR}$  (282 MHz, Chloroform-d):  $\delta$  -64.6. (Known compound: Ramachandran, P. V.; Otoo, B. *Chem. Commun.*, **2015**, 51, 12388-12390).

### (E)-4-phenyl-2-(3,3,3-trifluoroprop-1-enyl)thiophene (3r)

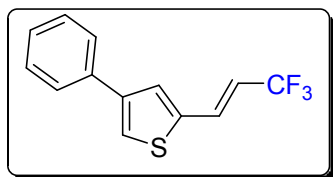

White solid. Yield: 65%.  $^1\text{H NMR}$  (400 MHz, Chloroform-d)  $\delta$  7.57 - 7.59 (m, 1H), 7.55 - 7.57 (m, 1H), 7.47 (d,  $J$  = 2.7 Hz, 2H), 7.40 - 7.45 (m, 2H), 7.33 - 7.36 (m, 1H), 7.29 - 7.32 (m, 1H), 6.07 (dq,  $J$  = 15.7, 6.5 Hz, 1H).  $^{19}\text{F NMR}$  (376.5 MHz, Chloroform-d)  $\delta$  -63.12. **HRMS (ESI)** calcd. for  $\text{C}_{13}\text{H}_9\text{F}_3\text{S}$  [ $\text{M}+\text{Na}$ ] $^+$ : 277.0269, found: 277.0274.

## 2.4 Mechanistic Studies

### (i) Radical trapping experiment

To a 10 mL clean, oven-dried screw cap reaction tube was added eosin-Y (5 mol%),  $\text{K}_2\text{HPO}_4$  (2.5 equiv),  $\beta$ -nitroalkene **1a** (1 equiv),  $\text{CF}_3\text{SO}_2\text{Cl}$  (2.5 equiv), TEMPO (4 equiv), and  $\text{CH}_3\text{CN}$  (2 mL) under argon atm. The reaction mixture was kept for stirring at room temperature with 32W compact fluorescent light bulb for 24 h. After usual work-up procedure, 96% of starting material (**1a**) was recovered.

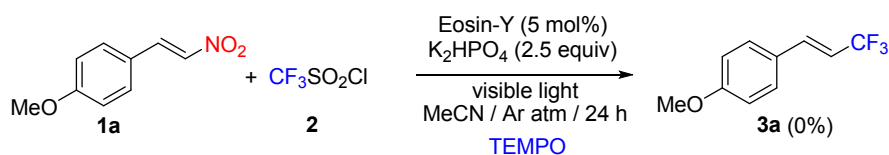

**Scheme S3.** Radical trapping experiment by TEMPO.

## (ii) TEMPO:CF<sub>3</sub> adduct

To a 10 mL clean, oven-dried screw cap reaction tube was added eosin-Y (5 mol%), CF<sub>3</sub>SO<sub>2</sub>Cl (1 equiv), TEMPO (1.1 equiv), and CH<sub>3</sub>CN (1mL) under argon atm. The reaction mixture was kept for stirring at room temperature with 32W compact fluorescent light bulb. After 8h of irradiation, a CF<sub>3</sub>-TEMPO adduct **4** was observed, which was identified through GC-MS analysis of the reaction mixture.

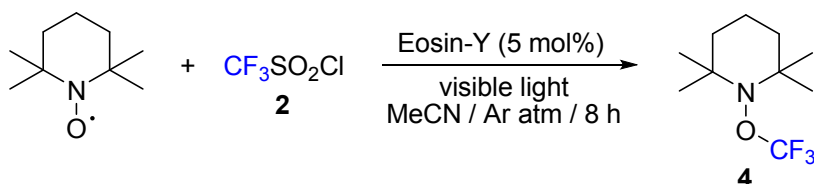

**Scheme S4.** Identification of TEMPO:CF<sub>3</sub> adduct**4**.

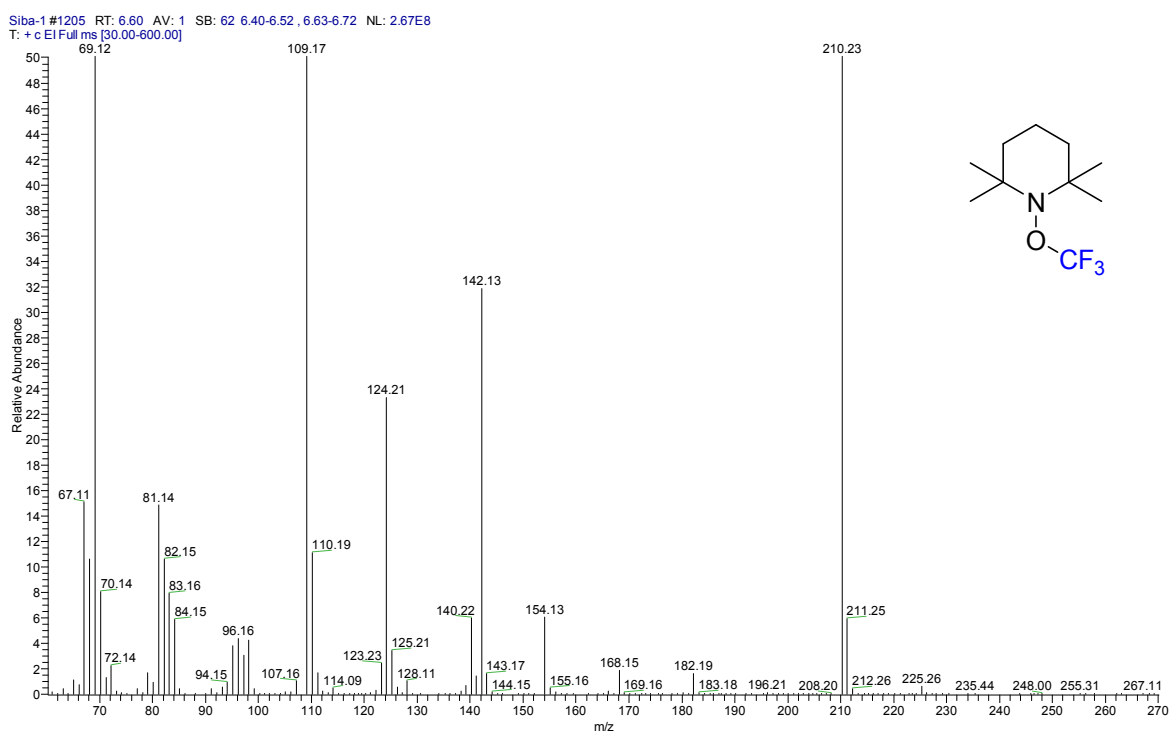

**Figure S2.** GC-MS data of compound **4**.

## (iii) Experimental procedure for other olefinic compounds

Initially, three 10 mL clean, oven-dried screw cap reaction tube were taken. To these reaction tubes, eosin-Y (5 mol%), K<sub>2</sub>HPO<sub>4</sub> (2.5 equiv), CF<sub>3</sub>SO<sub>2</sub>Cl (2.5 equiv), and CH<sub>3</sub>CN (1 mL) under argon atm were added separately. To this solution, 0.125 mmol of each 4-methoxy styrene, 4-methoxy  $\beta$ -bromostyrene and 4-methoxy cinnamic acid was added respectively. Then all three reaction mixtures were kept for stirring at room temperature with 32W

compact fluorescent light bulb for 24 h. After usual work-up procedure, trifluoromethylated product was not observed for all the three cases.

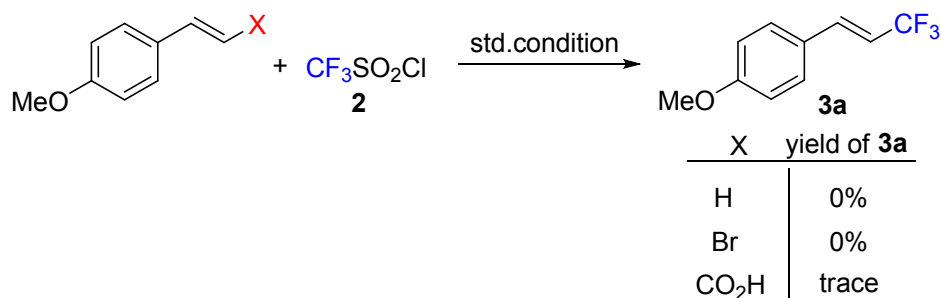

**Scheme S5.** Trifluoromethylation for other olefinic compounds.

#### (iv) Emission Quenching Experiments

For the emission quenching experiment we used  $2.06 \times 10^{-3}$  (M) solution of eosin-Y in acetonitrile (2 mg in 1.5 mL). An appropriate amount of quencher was added for several times to that eosin-Y solution in a screw-top 3.0 cm quartz cuvette. All eosin-Y solution with or without quencher were excited at 460 nm and the emission intensity at 555 nm was observed and the emission spectrum of the sample was collected.

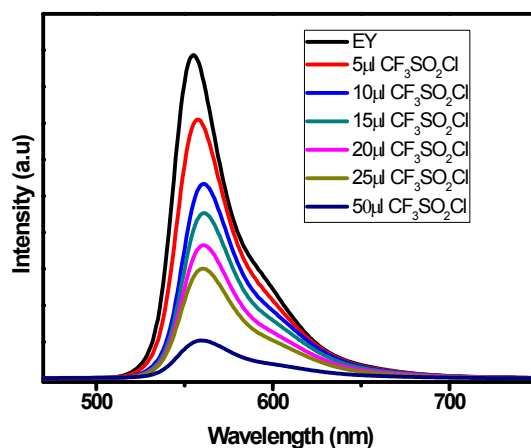

**Figure S4.** Fluorescence spectroscopy of eosin-Y in presence different concentration of quencher  $\text{CF}_3\text{SO}_2\text{Cl}$ .

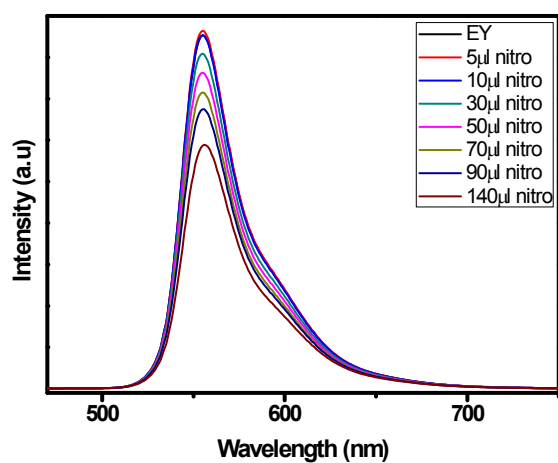

**Figure S5.** Fluorescence spectroscopy of eosin-Y in presence different concentration of quencher 4-fluoro nitroalkene.

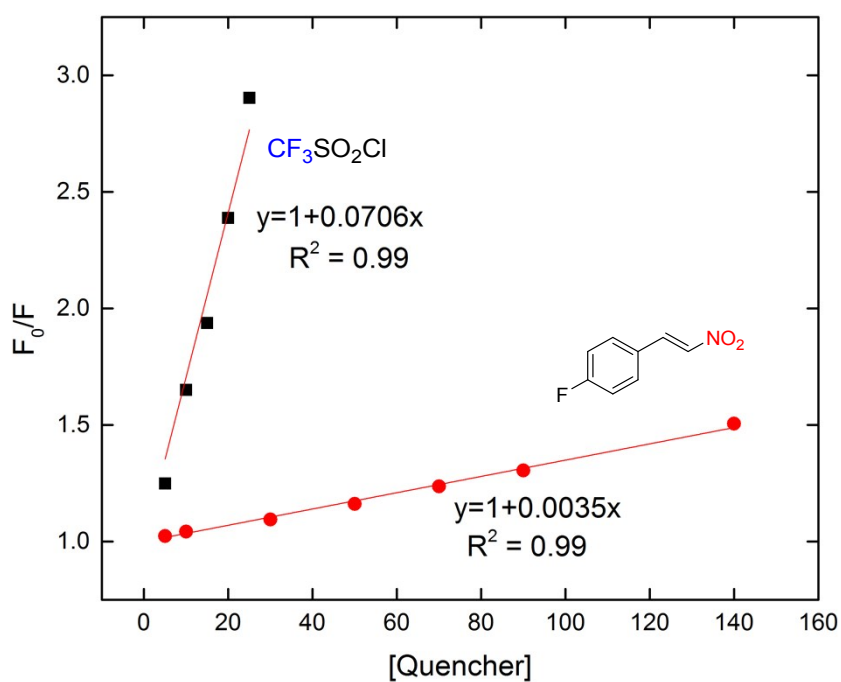

**Figure S6.** Eosin-Y emission quenching using  $CF_3SO_2Cl$  and 4-fluoro-nitroalkene as quenchers.

Summary of emission quenching experiment:

| Quencher                           | Stern-Volmer constant ( $K_{sv} \times 10^{-3}$ ) |
|------------------------------------|---------------------------------------------------|
| CF <sub>3</sub> SO <sub>2</sub> Cl | 71                                                |
| 4-fluoro nitroalkene               | 3.4                                               |

#### (v) Cyclic voltammetry (CV) study

Cyclic Voltammetry measured at 10mVS<sup>-1</sup> scan rate using Ag/AgCl as reference electrode and Pt wire counter electrode in anhydrous acetonitrile with 0.1M Tetra butyl ammonium perchlorate (TBAP) as supporting electrolyte. Nitrobenzene undergoes 2e reduction, thus we have observed two reduction peaks.

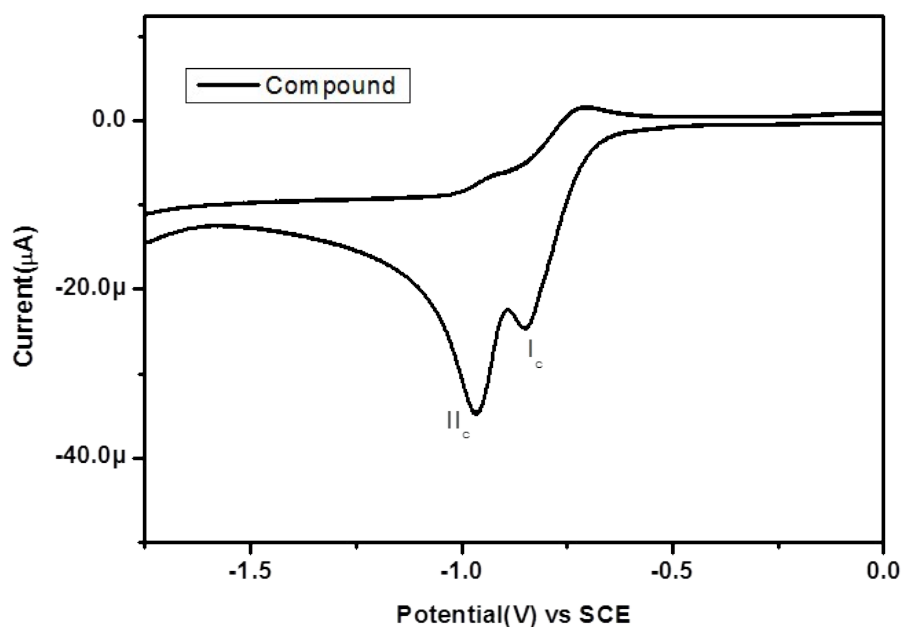

**Figure S7.** Cyclic voltammetry of 4-methoxy nitroalkene **1a**.

### 3. References

- S1. W. L. F. Armarego and Perrin, D. D. *Purification of Laboratory Chemicals* (Pergamon Press, Oxford, 1988) ed 3.
- S2. V. Ashokkumar and A. Siva, *Org. Biomol. Chem.*, 2015, **13**, 10216-10225.
- S3. J. G. Greger, S. J. P. Yoon-Miller, N. R. Bechtold, S. A. Flewelling, J. P. MacDonald, C. R. Downey, E. A. Cohen and E. T. Pelkey, *J. Org. Chem.*, 2011, **76**, 8203-8214.

## 4. NMR Spectra

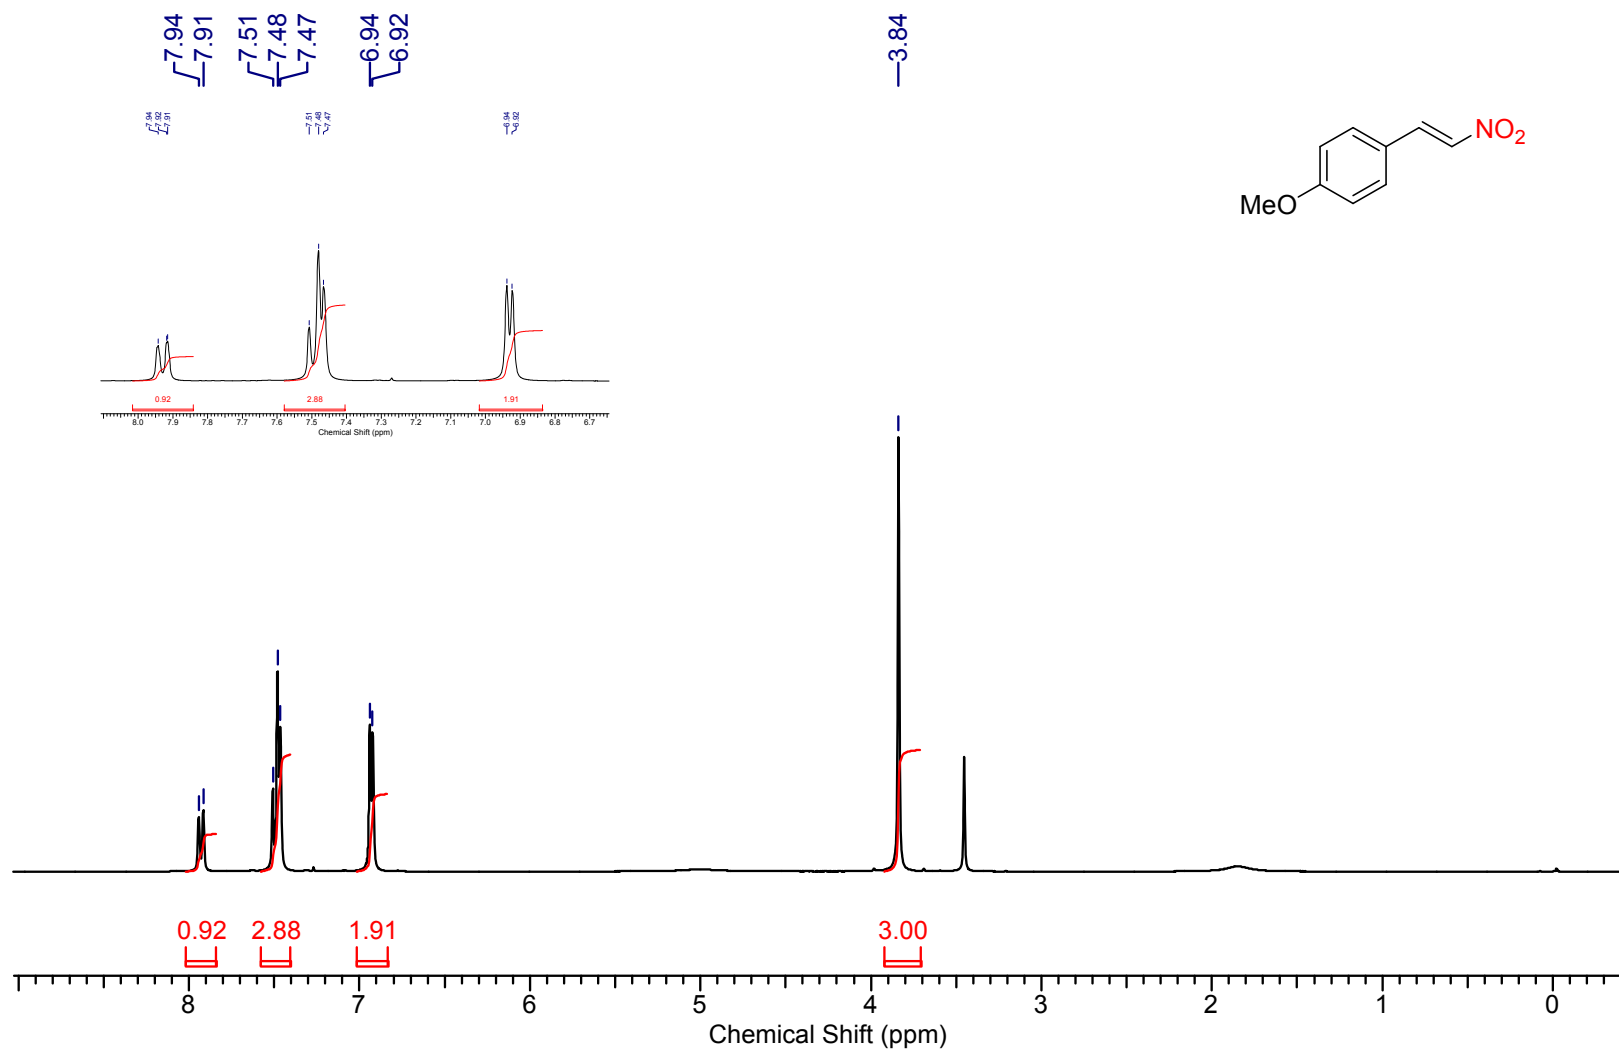

Figure S7a.  $^1\text{H}$  NMR of 1a



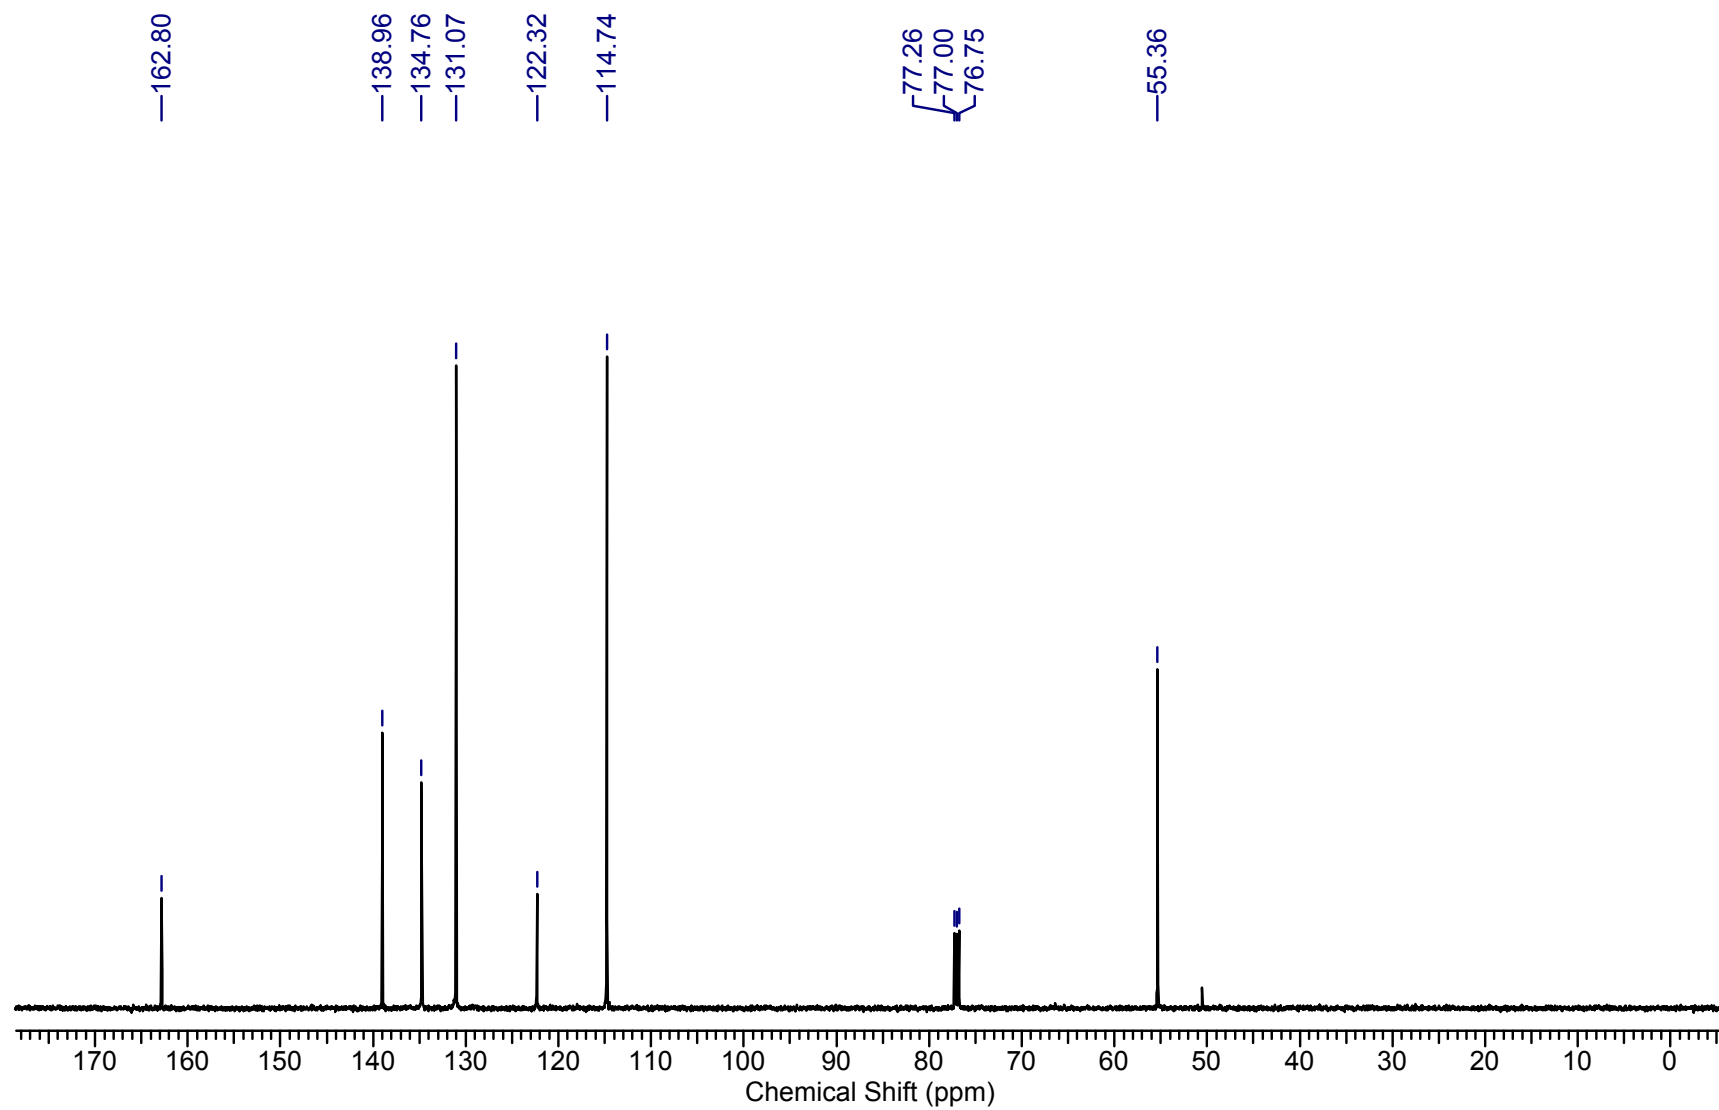

**Figure S7b.**  $^{13}\text{C}$  NMR of 1a

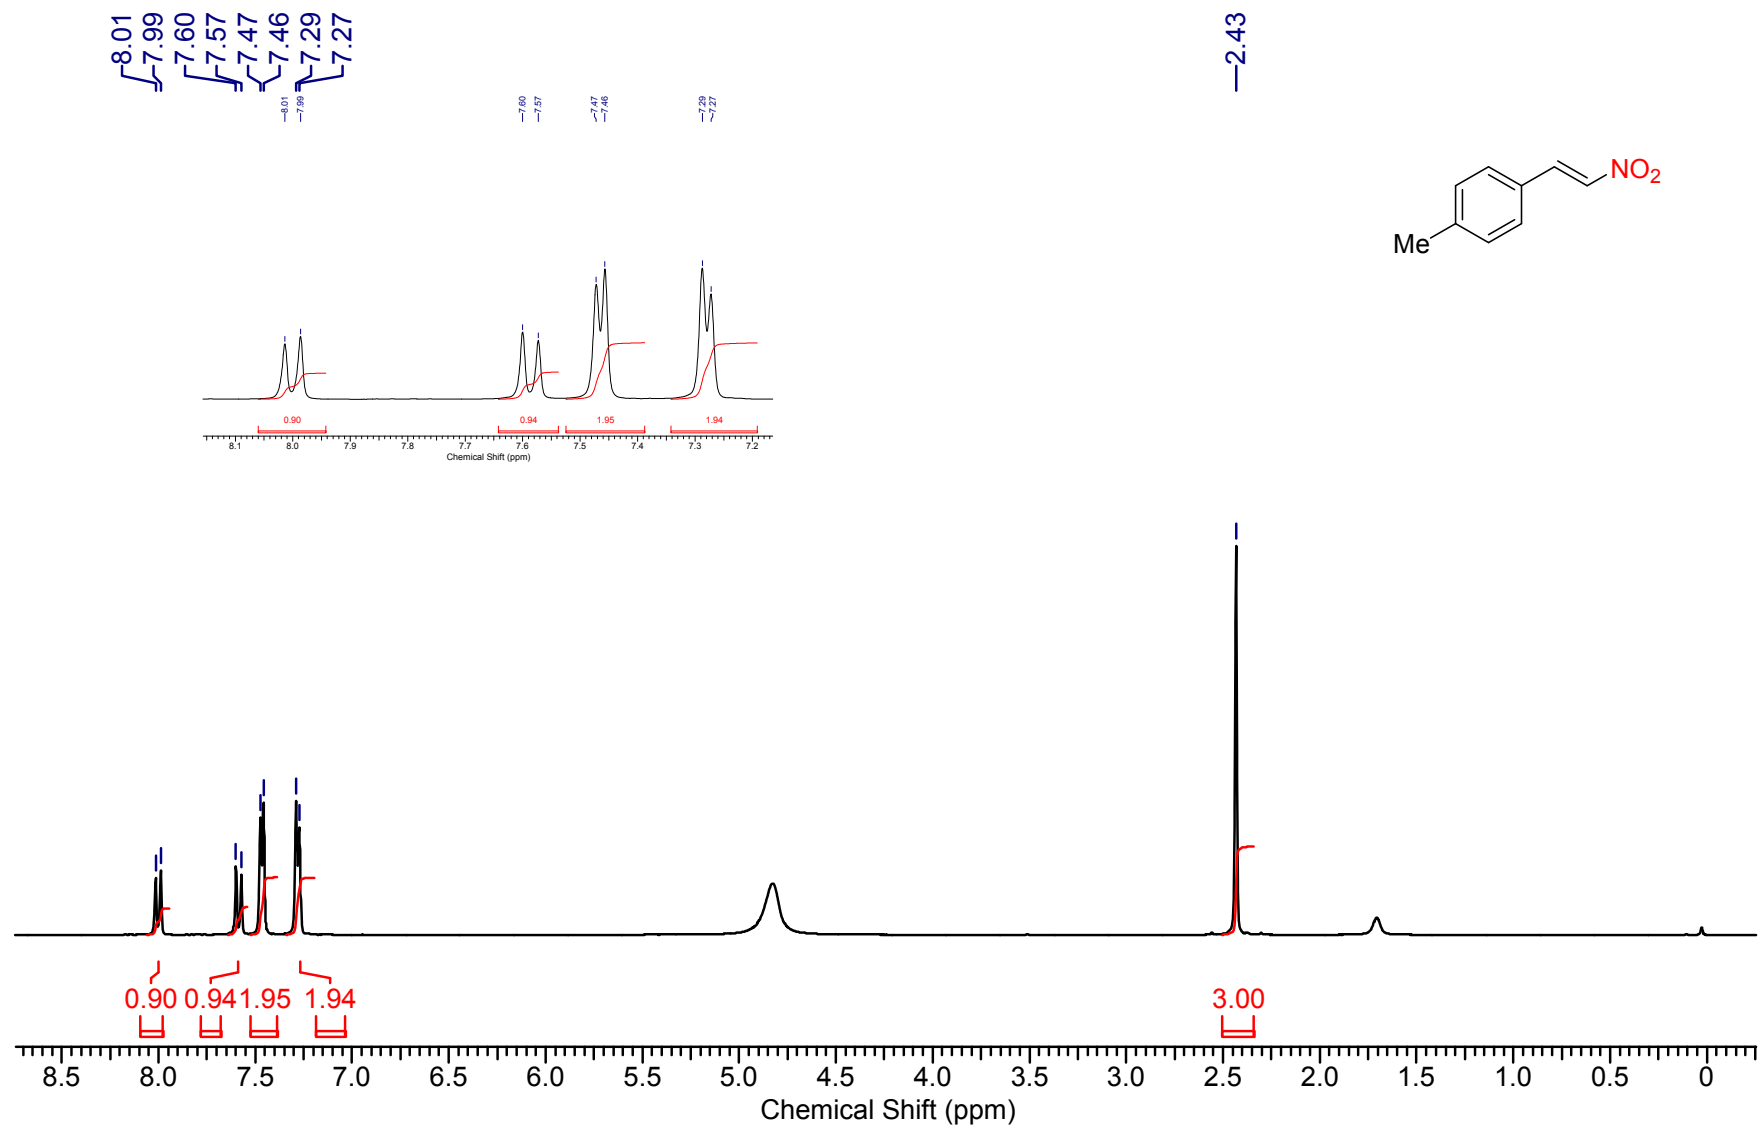

Figure S8a. <sup>1</sup>H NMR of 1b

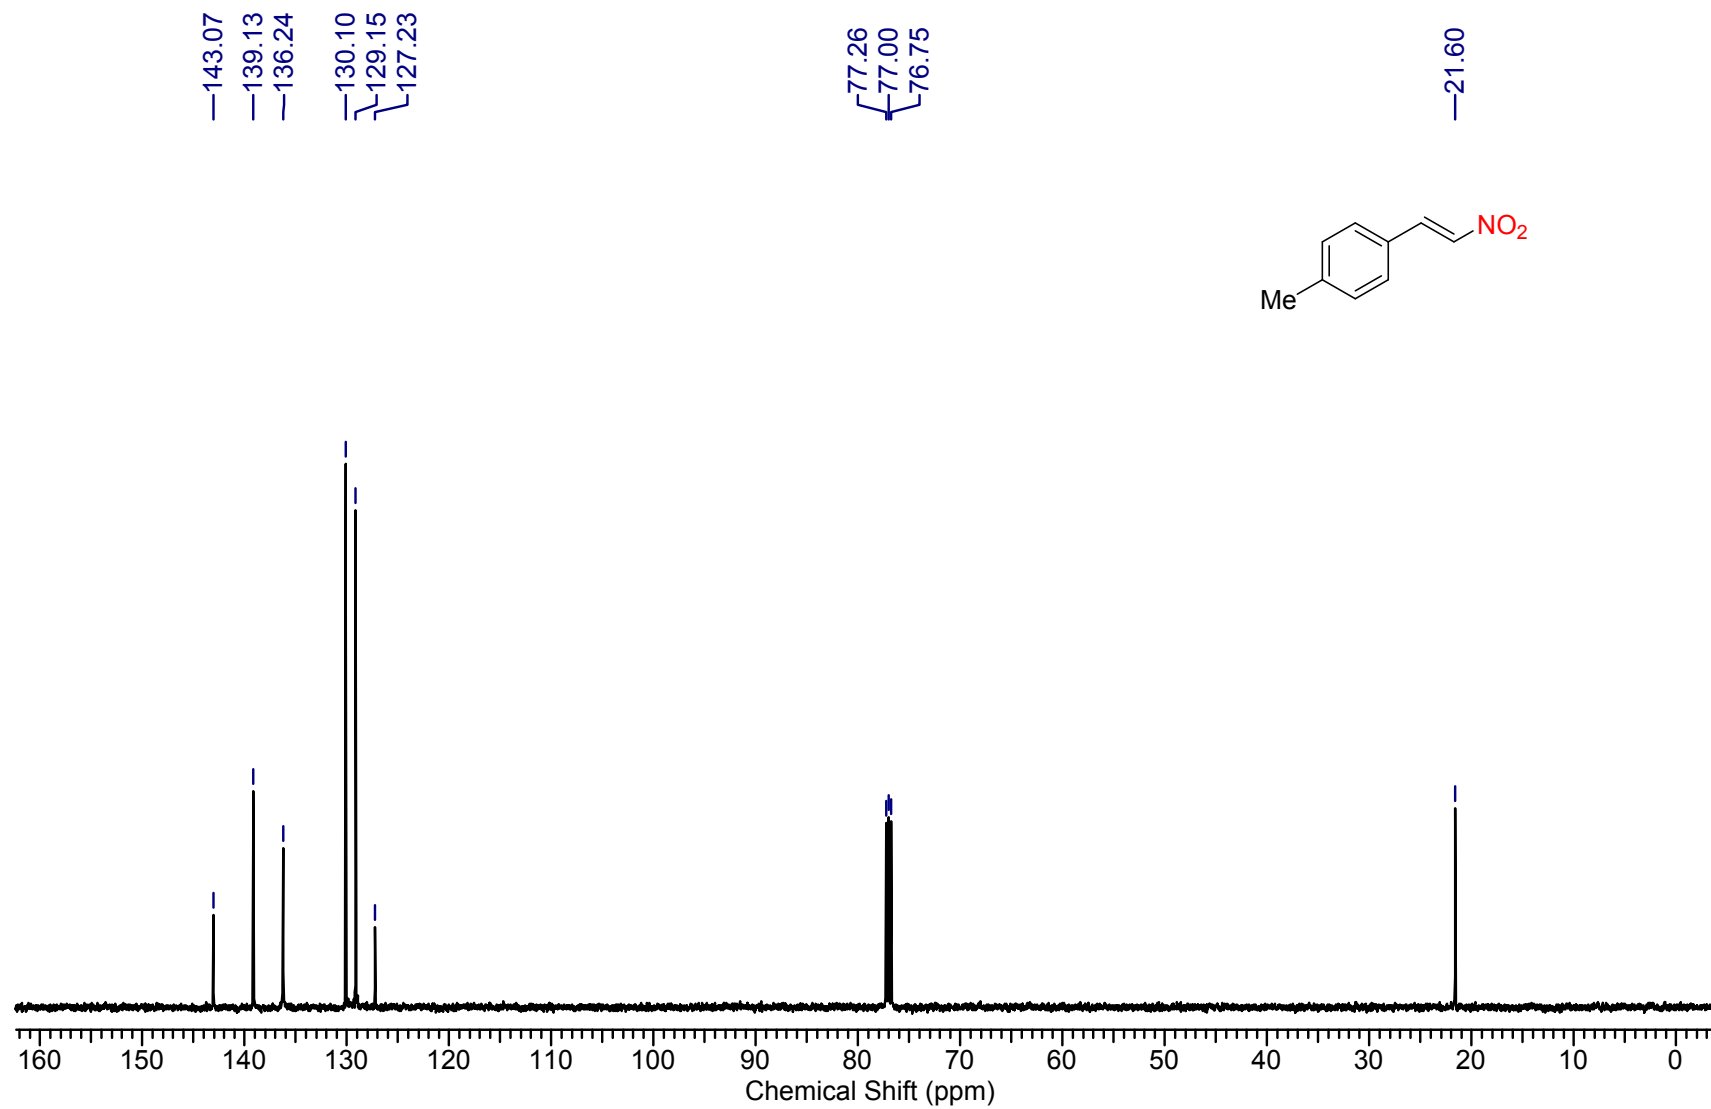

Figure S8b. <sup>13</sup>C NMR of 1b

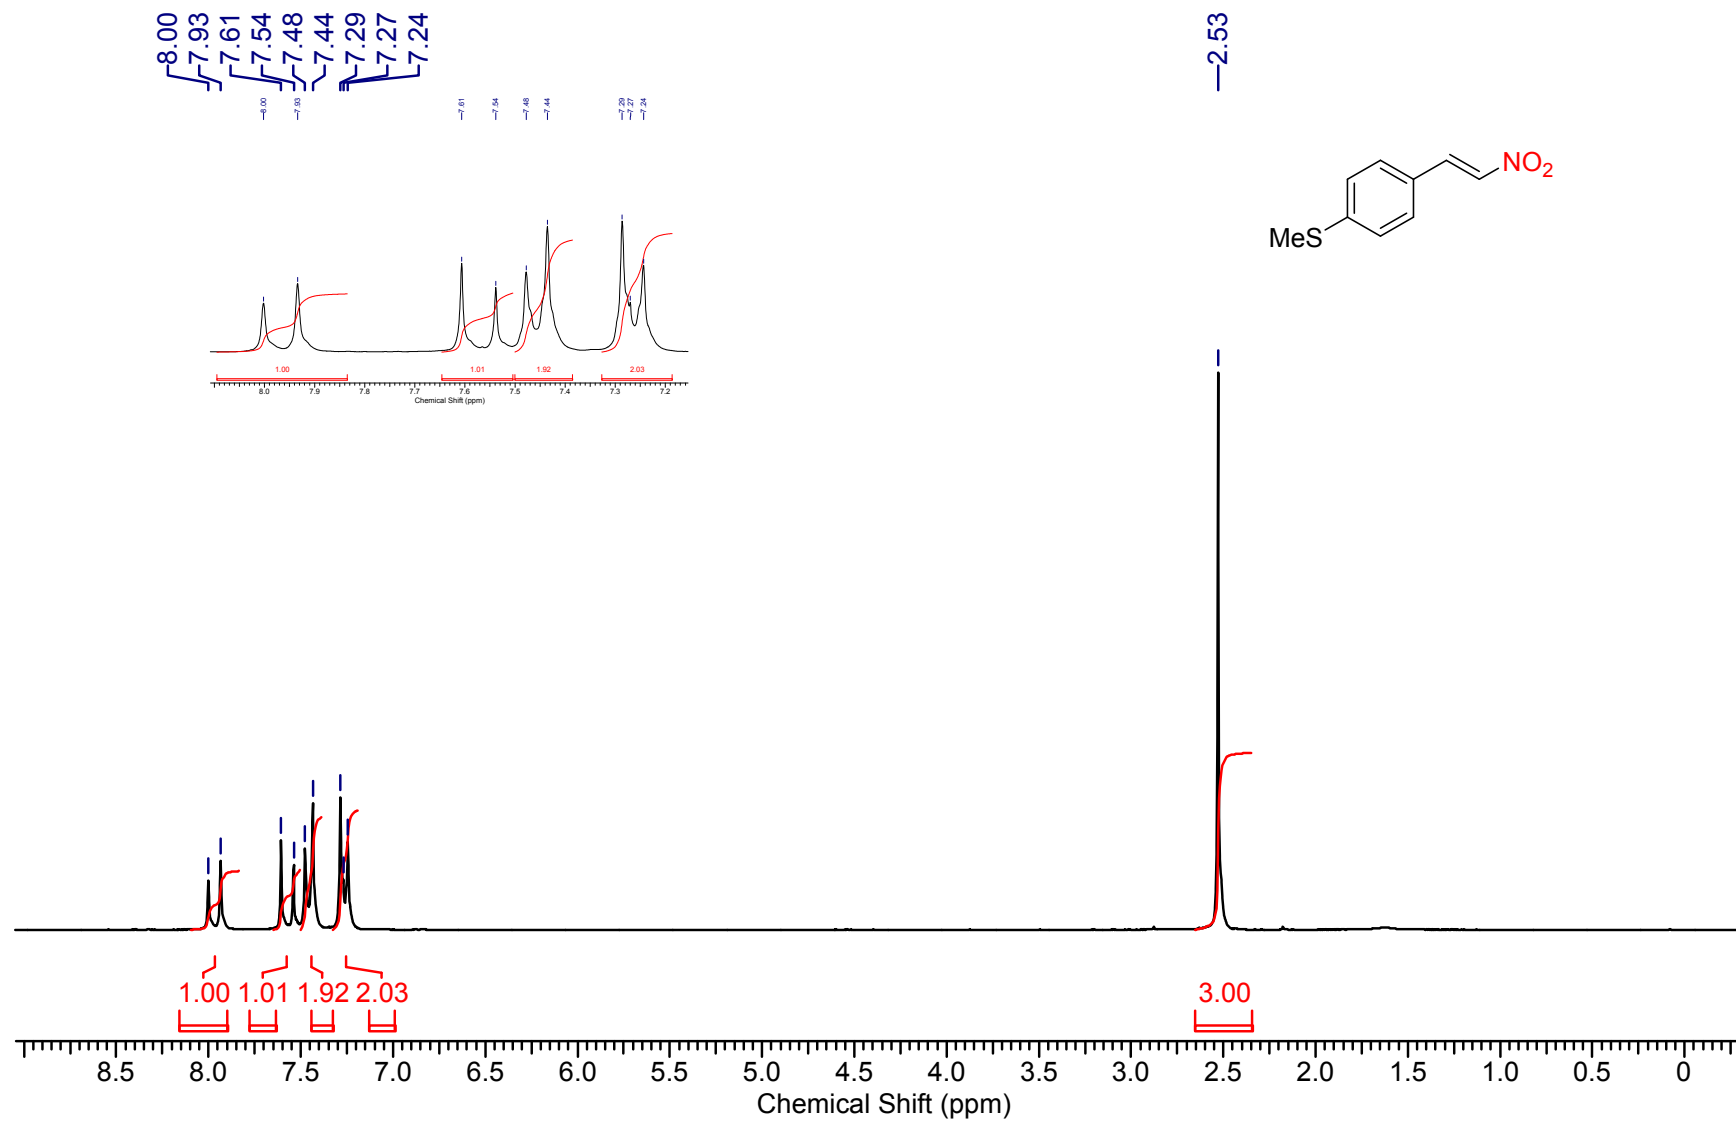

Figure S9a. <sup>1</sup>H NMR of 1c

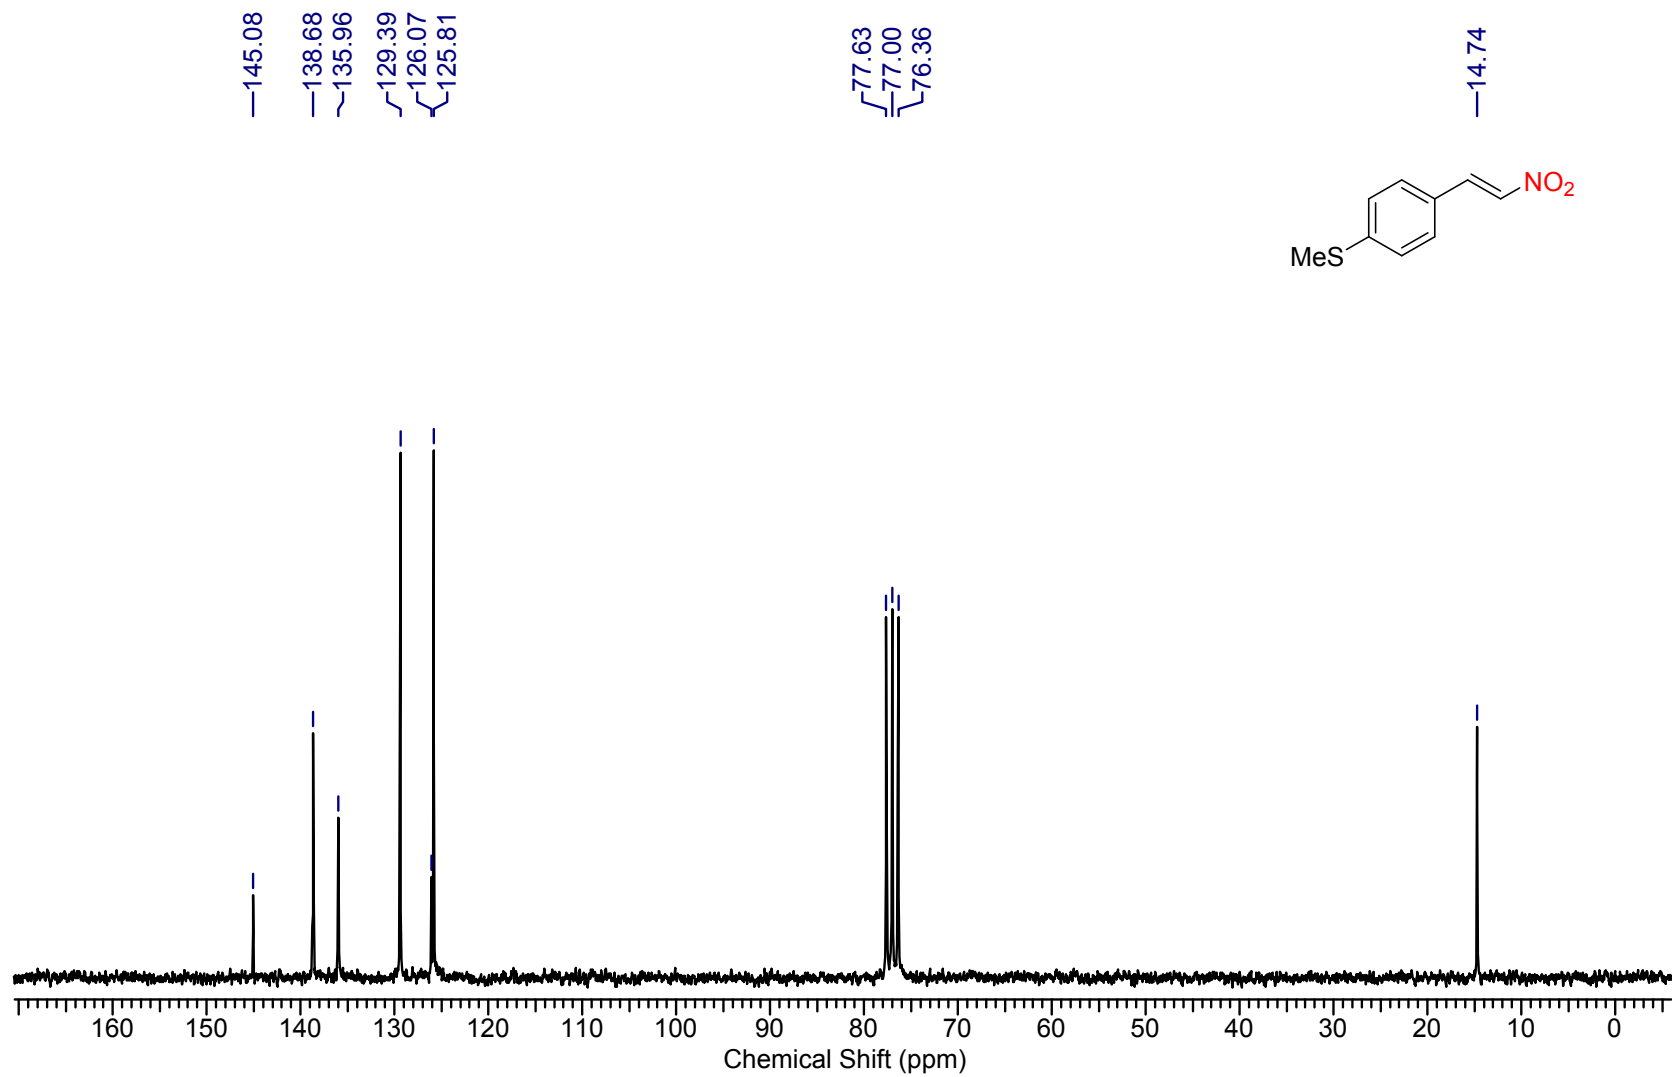

**Figure S9b.**  $^{13}\text{C}$  NMR of **1c**

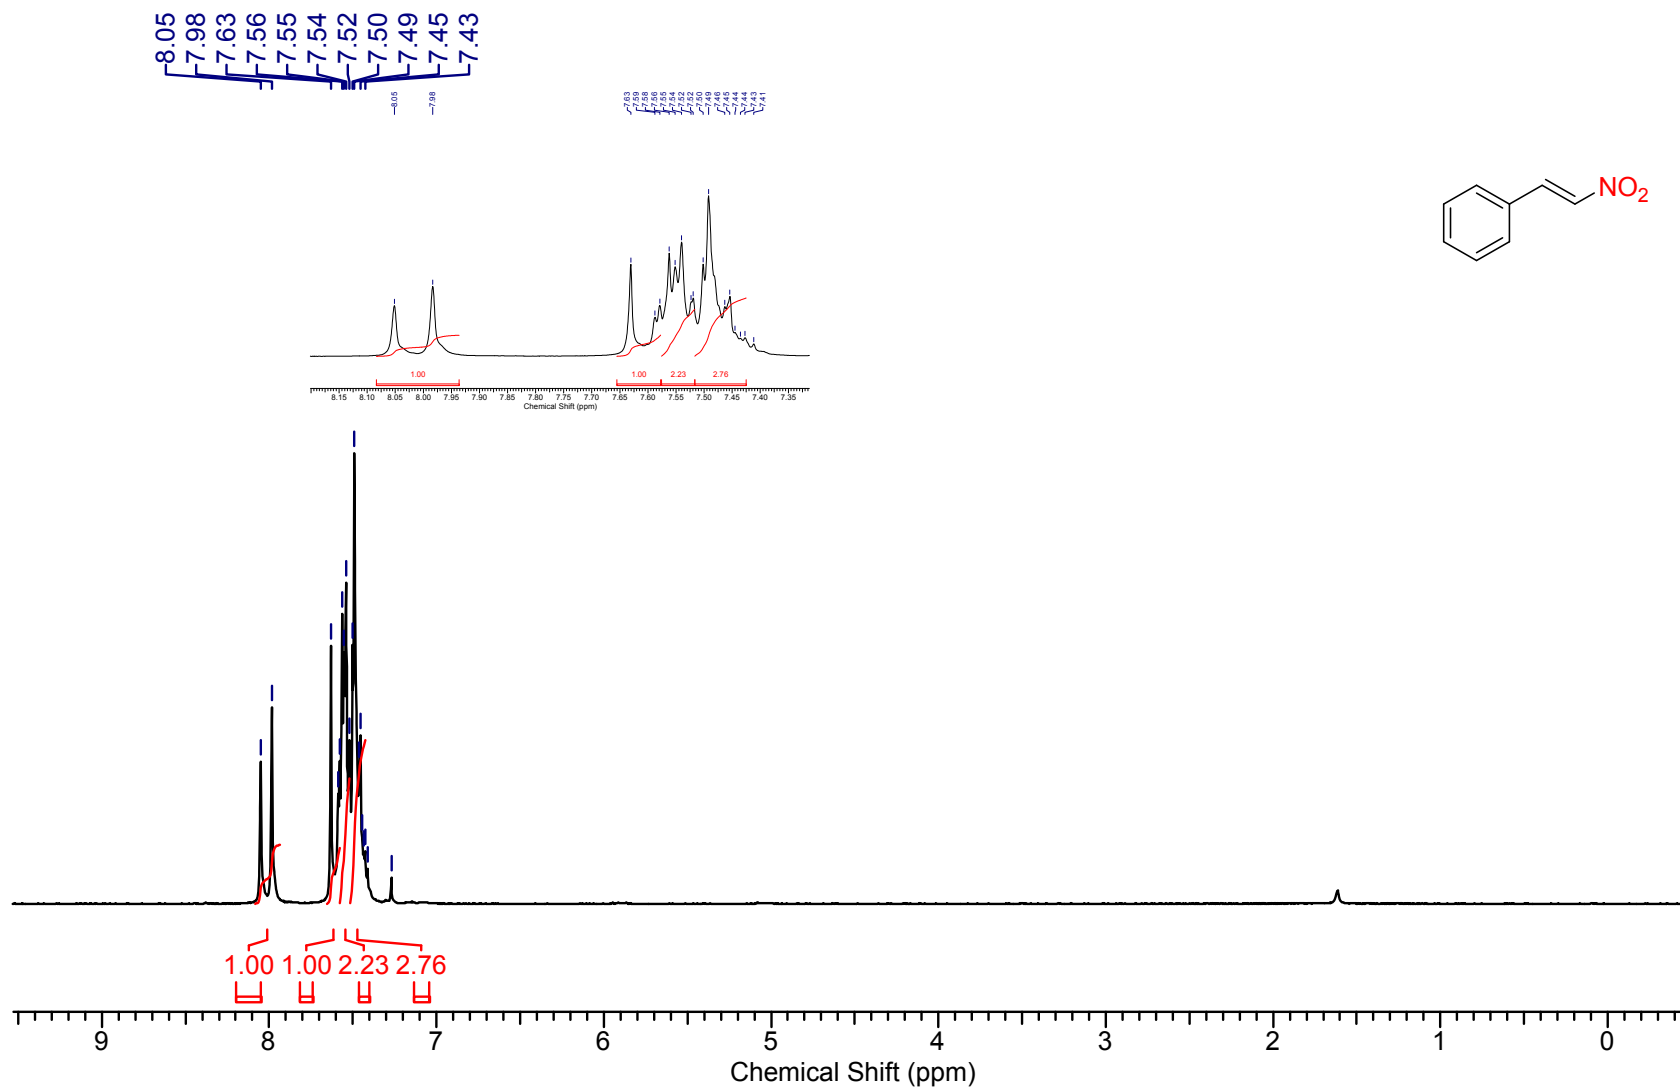

Figure S10a. <sup>1</sup>H NMR of 1d

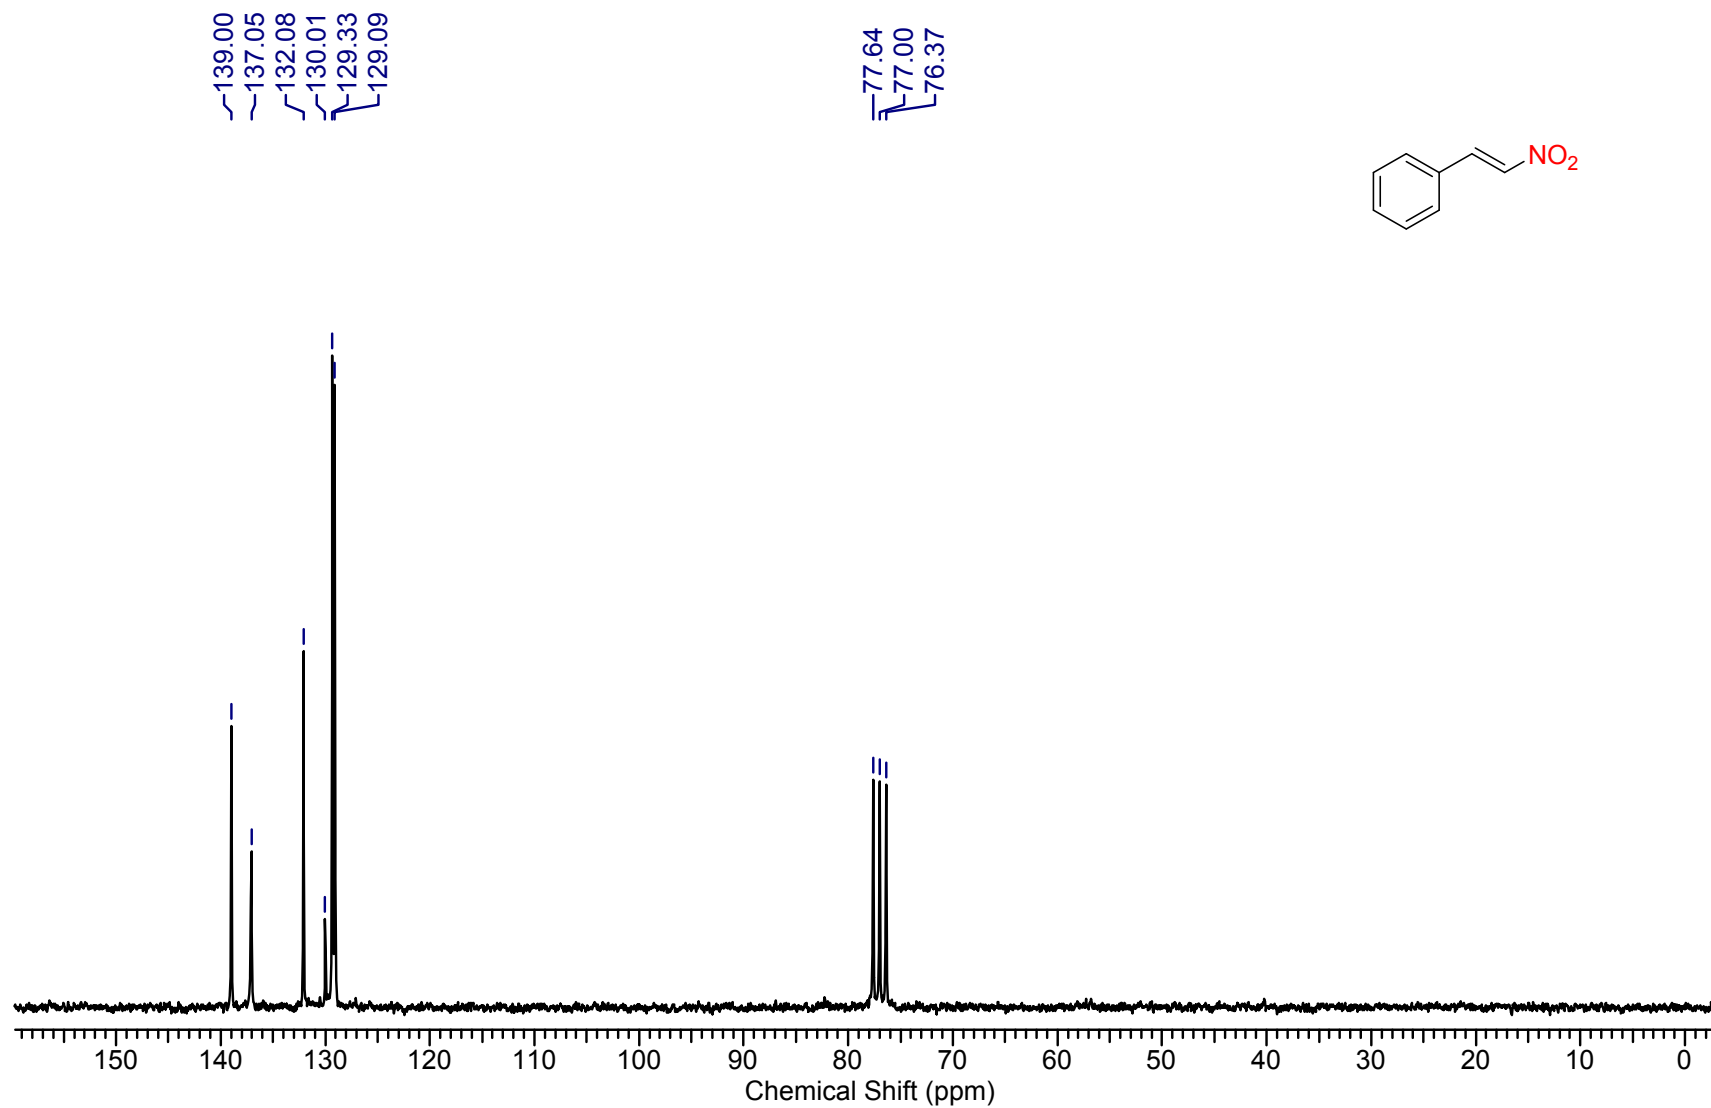

Figure S10b.  $^{13}\text{C}$  NMR of **1d**

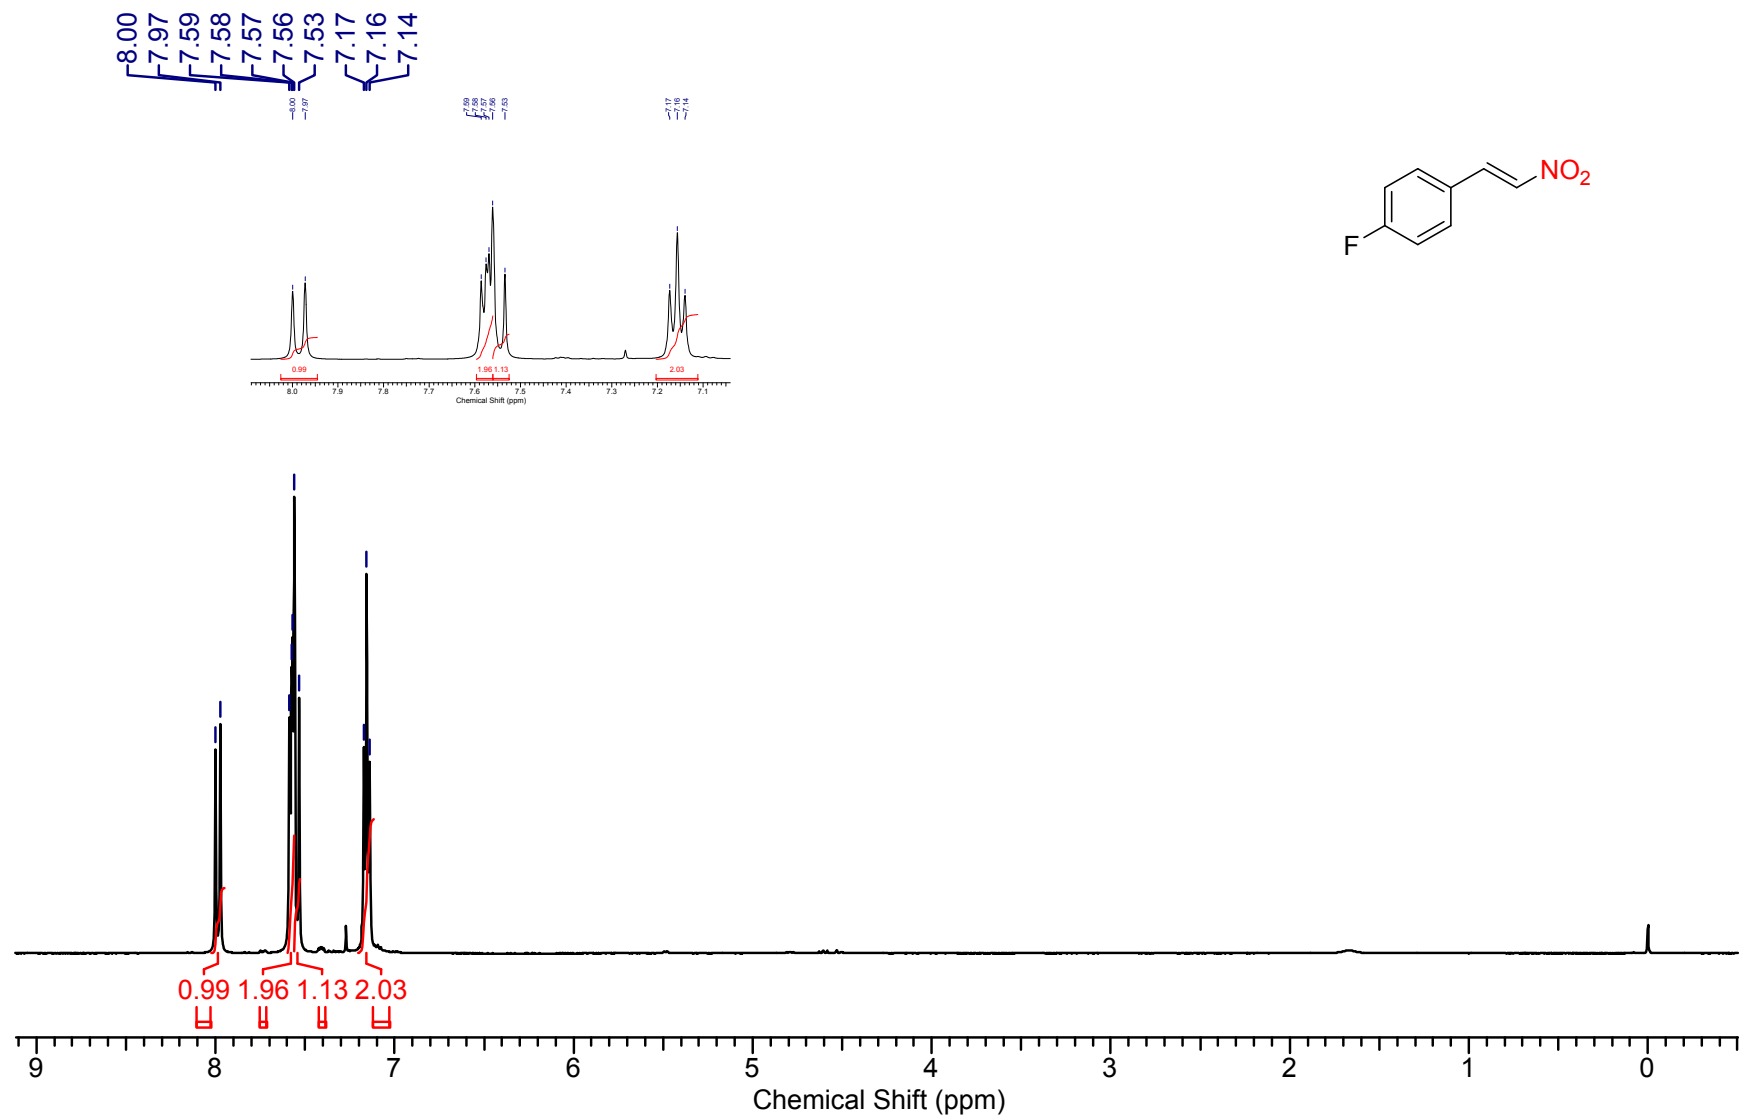

Figure S11a.  $^1\text{H}$  NMR of **1e**



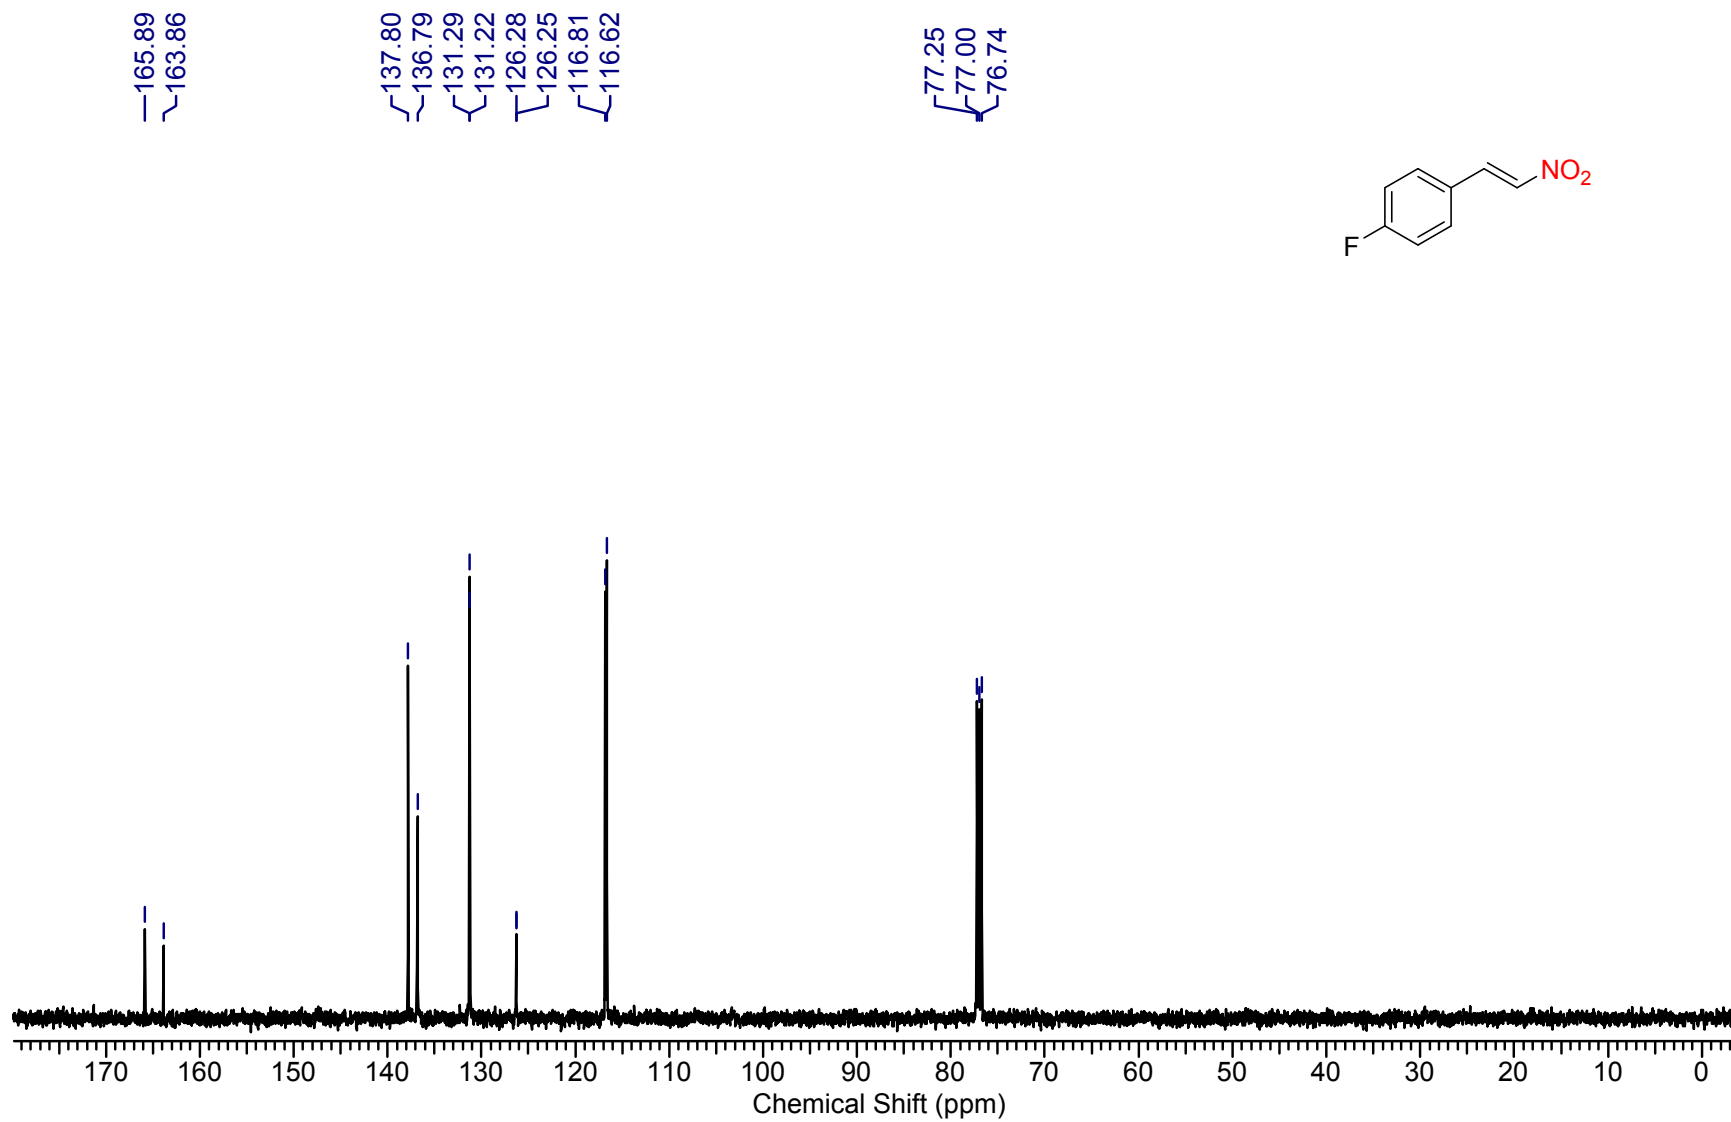

Figure S11b. <sup>13</sup>C NMR of 1e

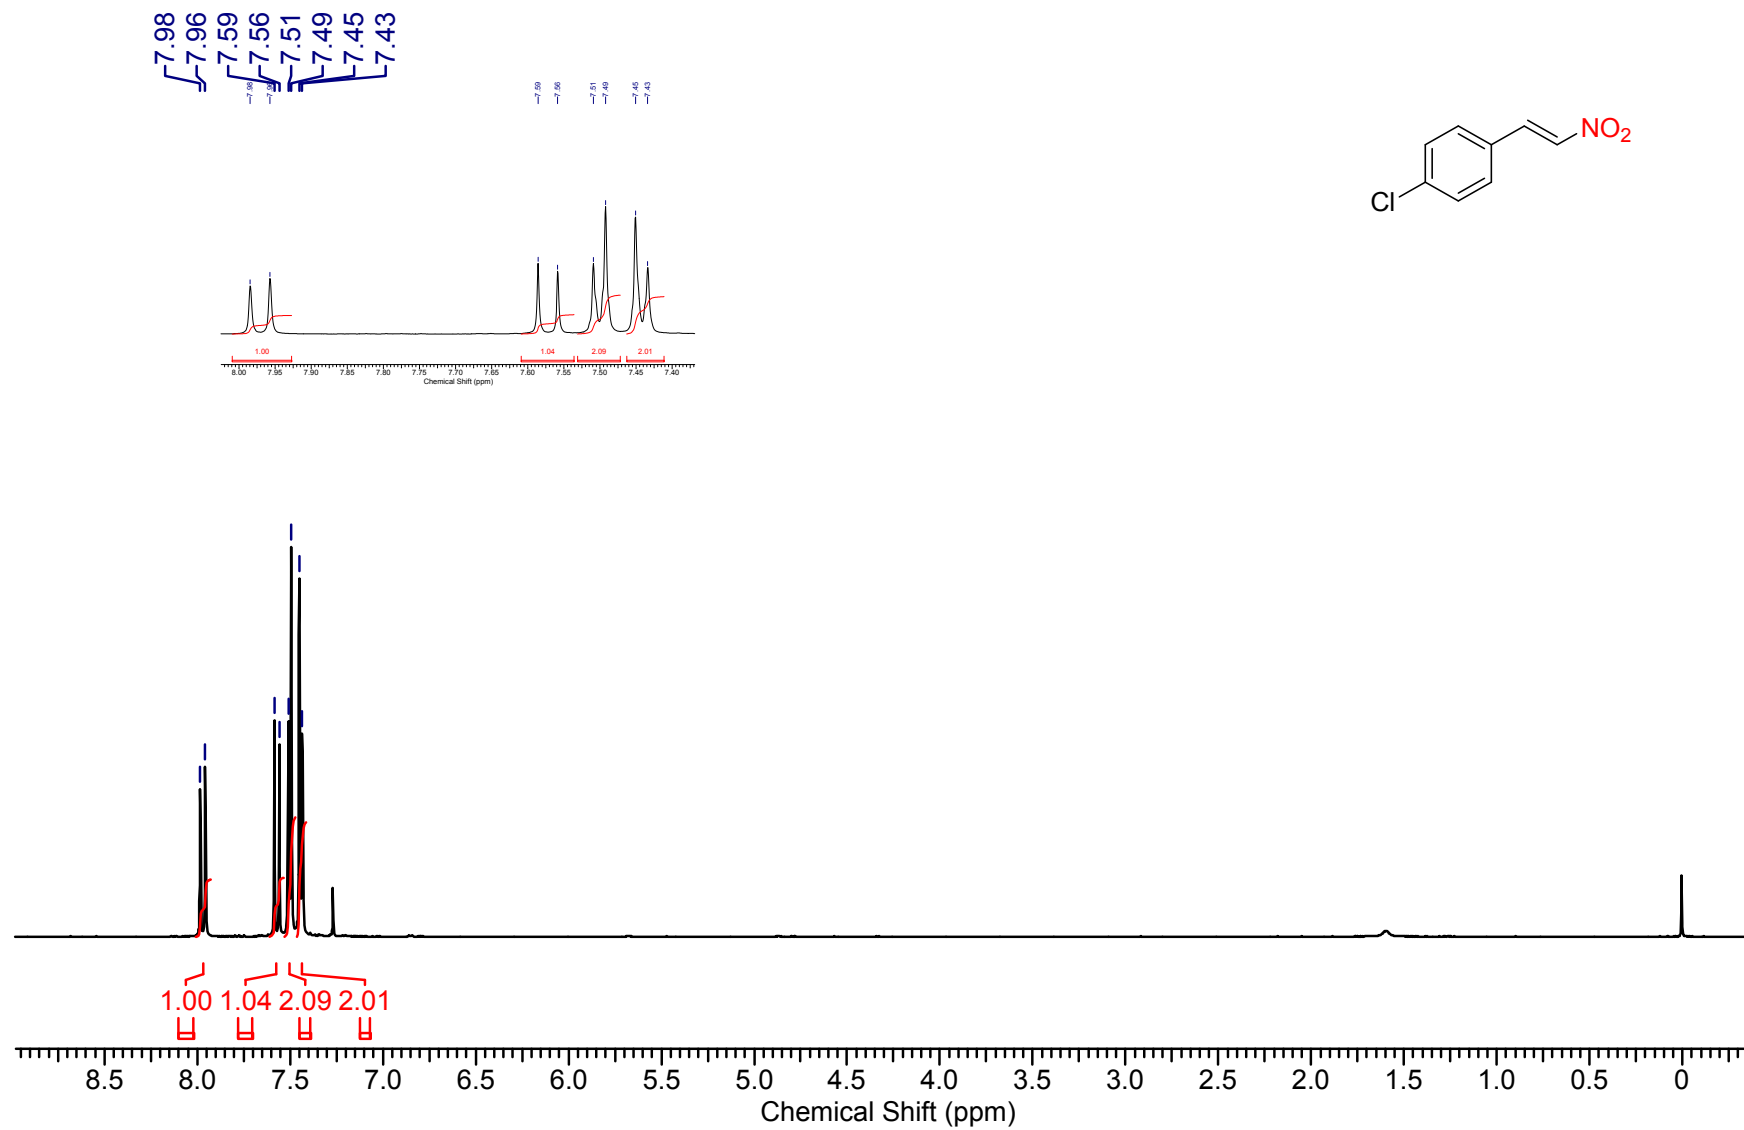

Figure S12a. <sup>1</sup>H NMR of 1f

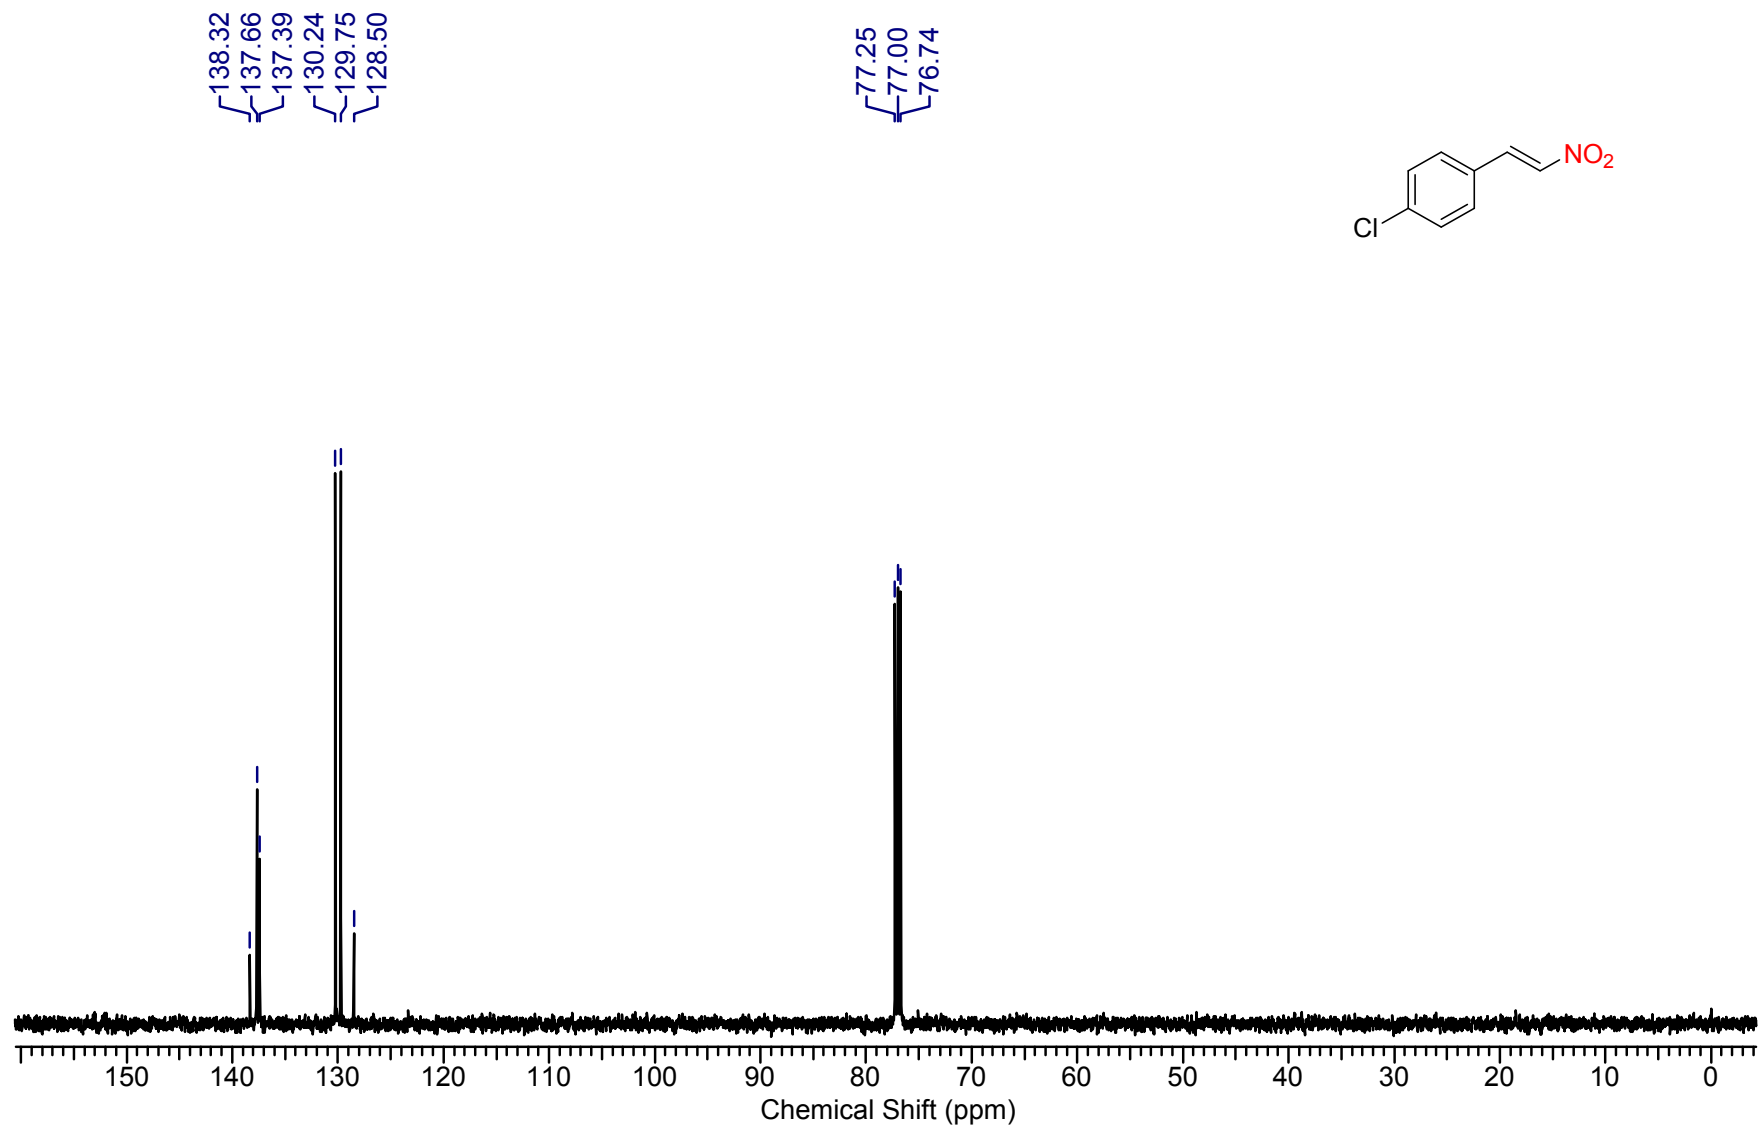

Figure S12b.  $^{13}\text{C}$  NMR of **1f**

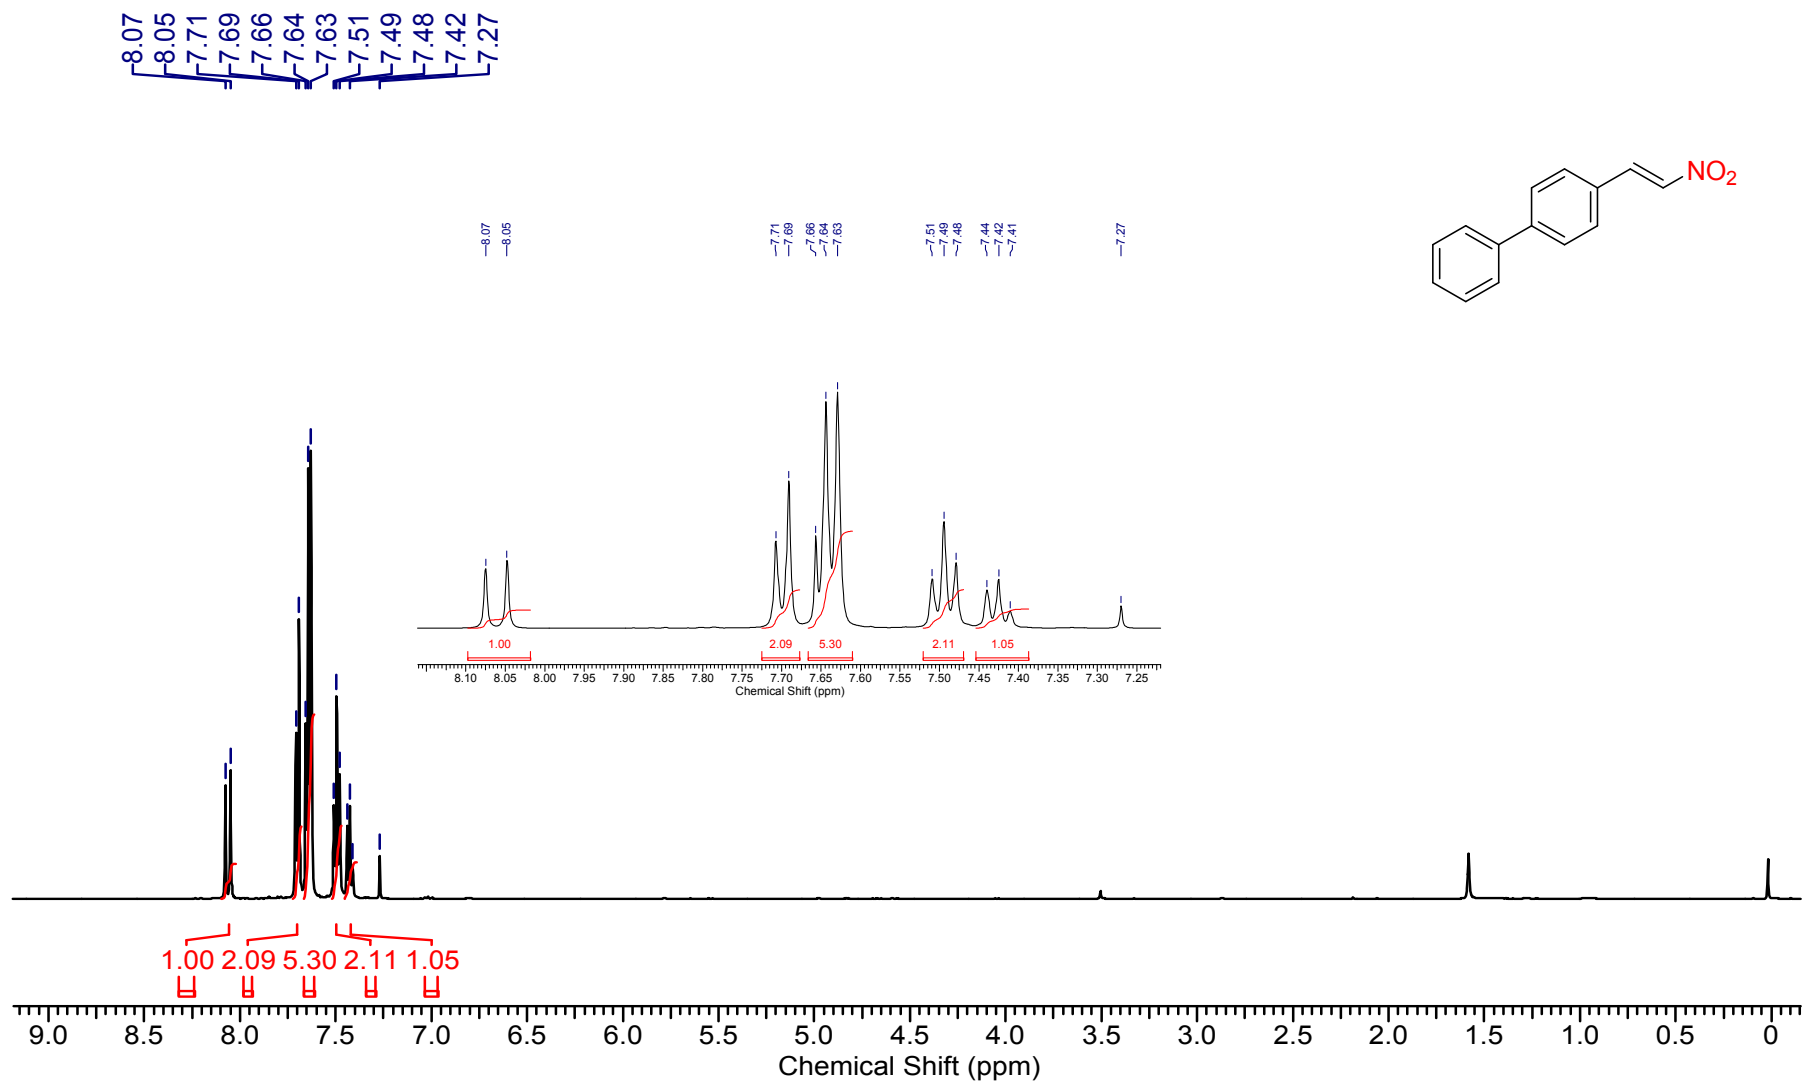

Figure S13a.  $^1\text{H}$  NMR of **1g**

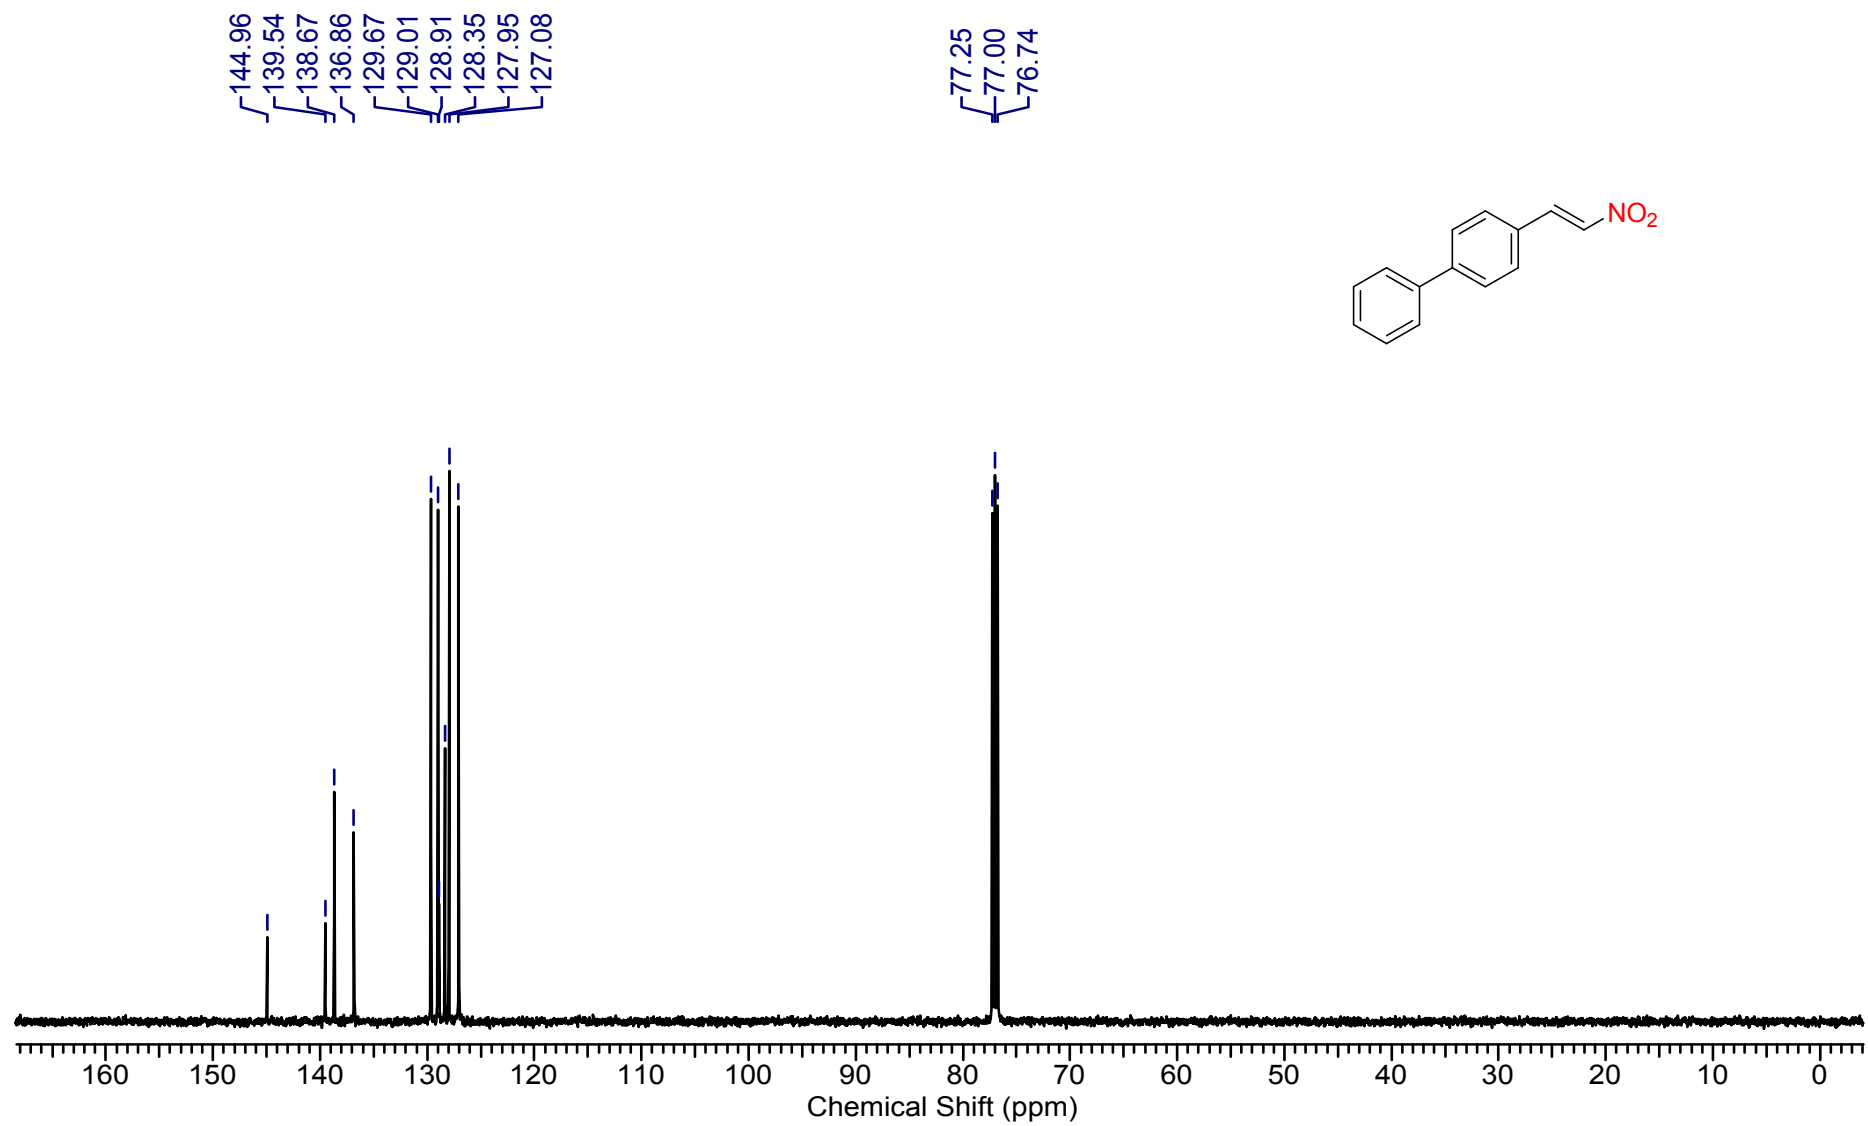

Figure S13b. <sup>13</sup>C NMR of 1g

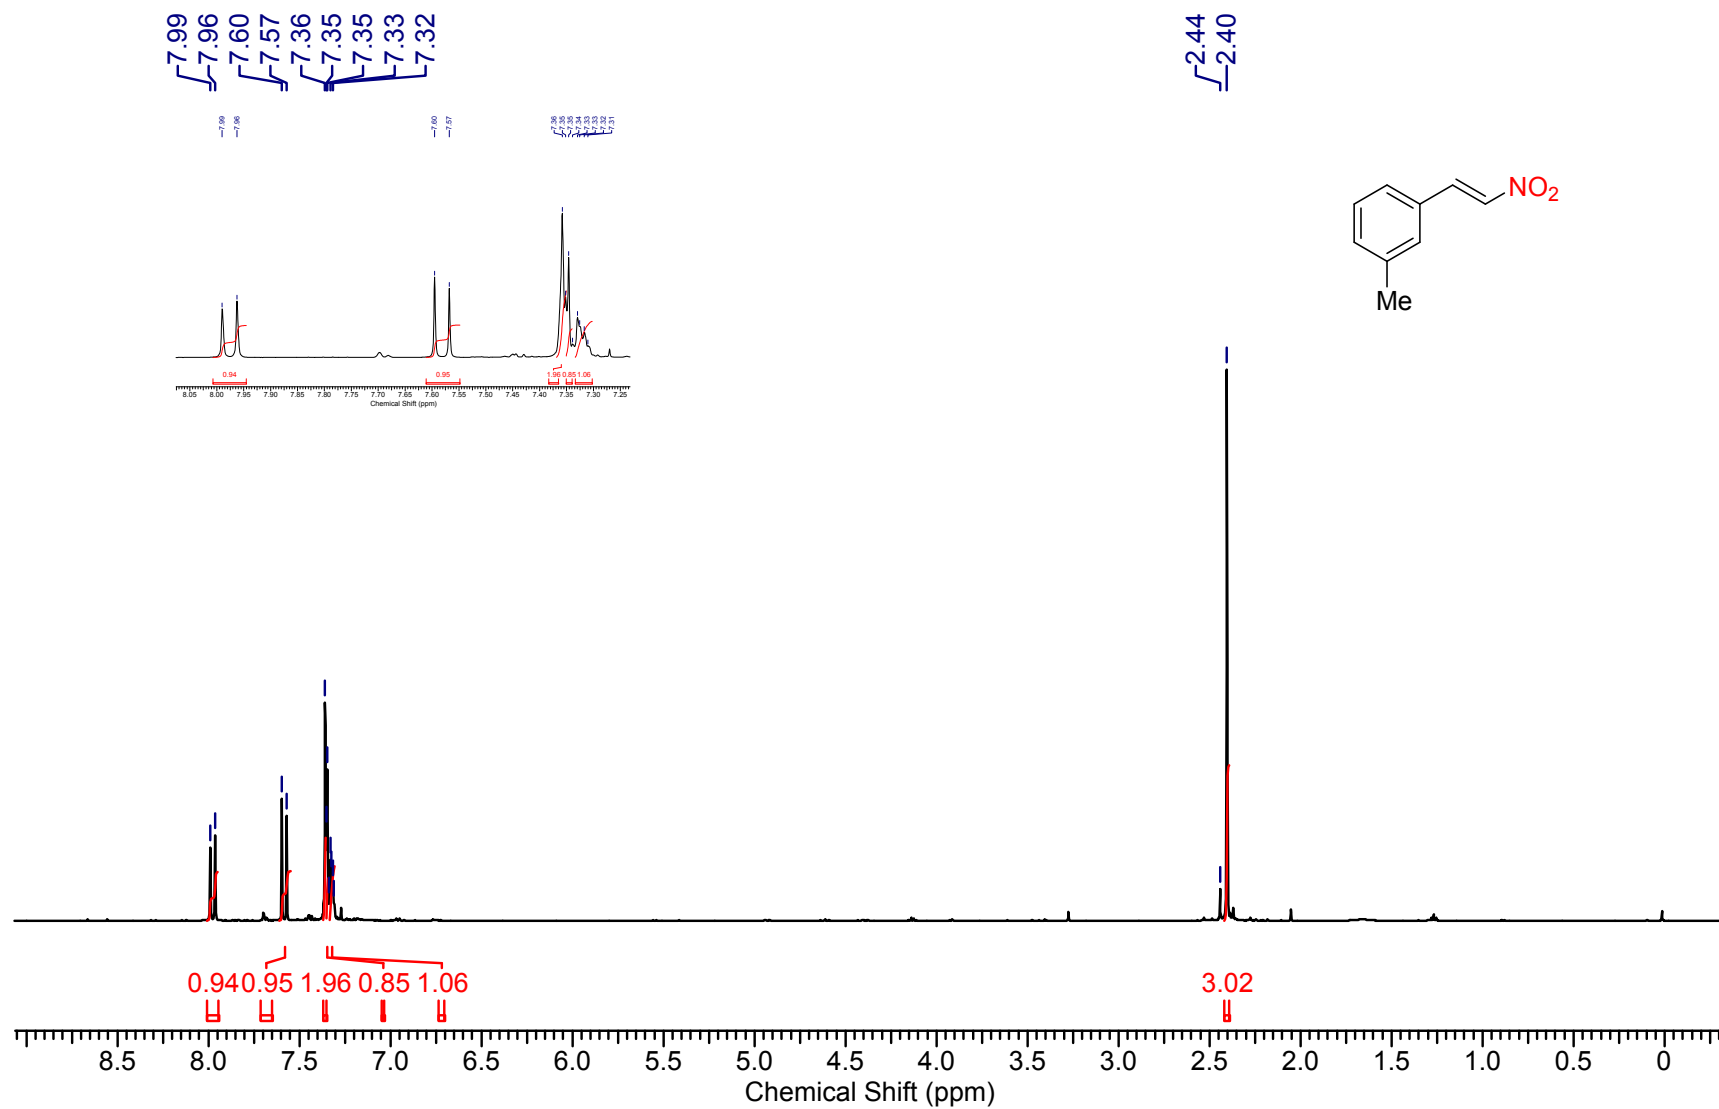

Figure S14a. <sup>1</sup>H NMR of **1i**

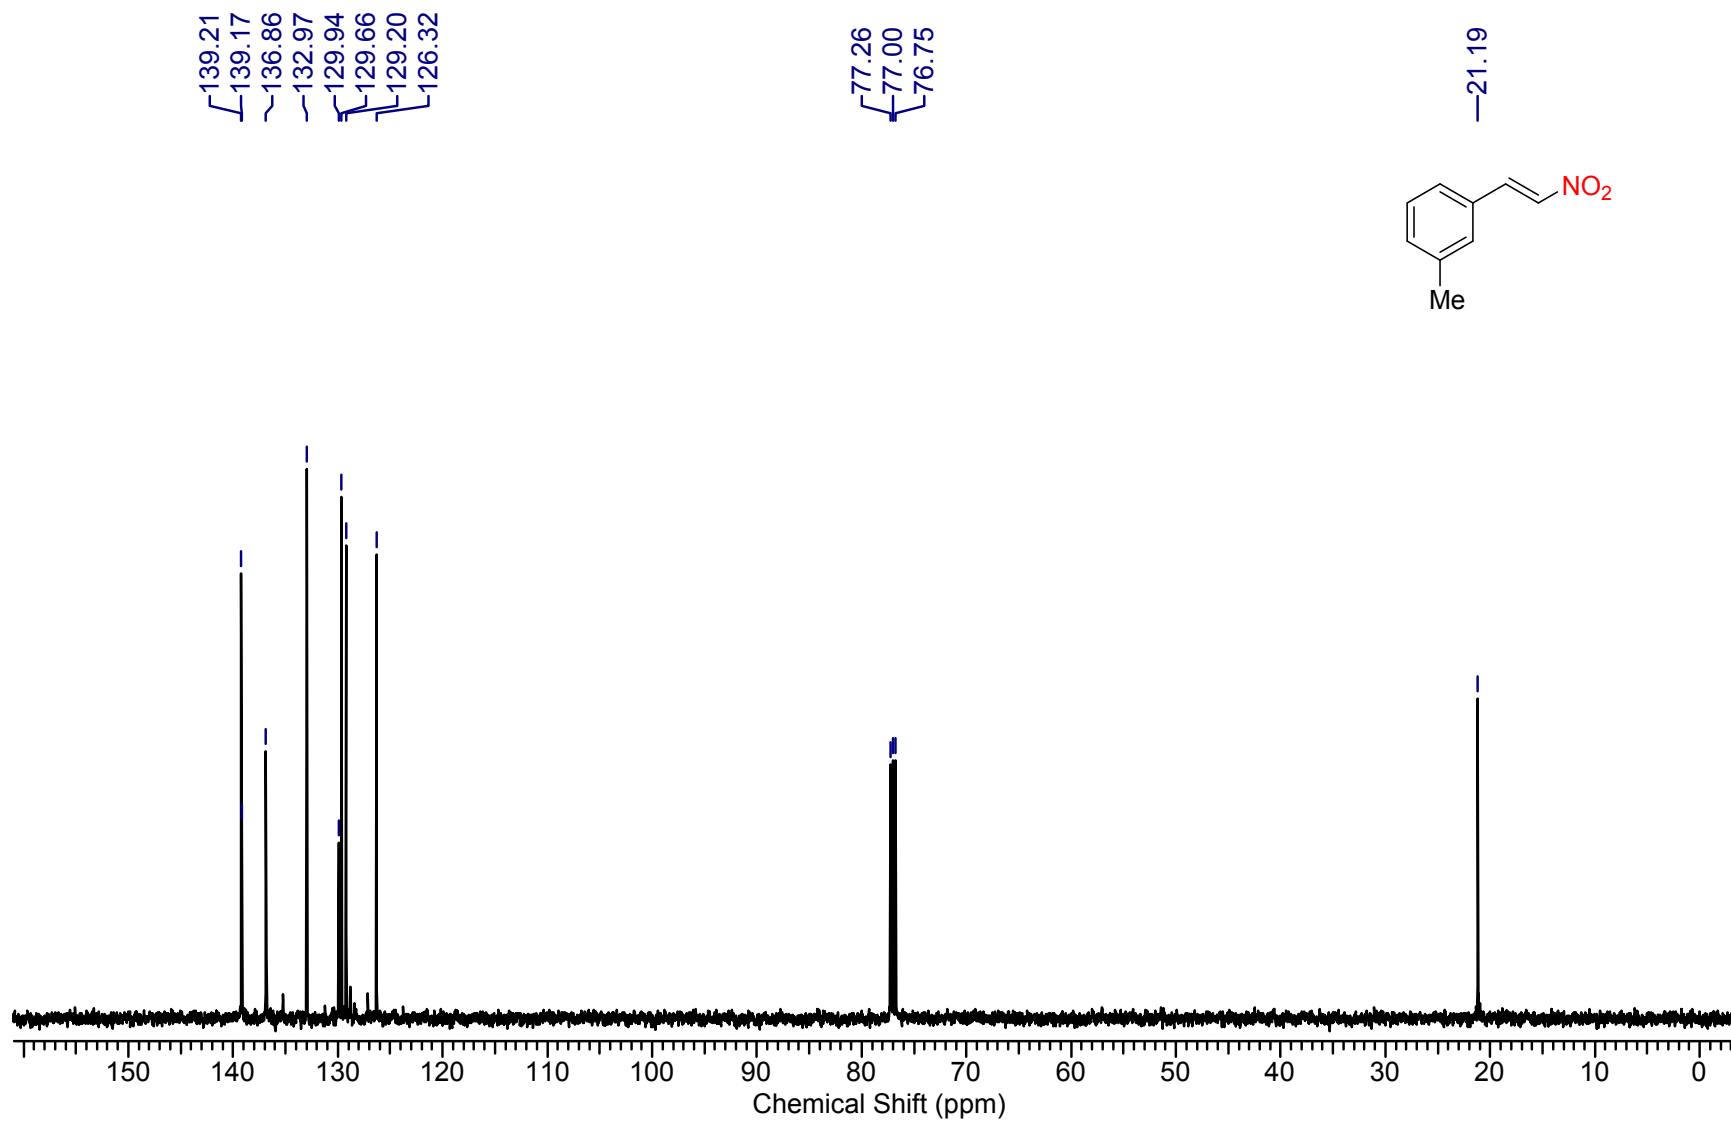

Figure S14b.  $^{13}\text{C}$  NMR of **1i**

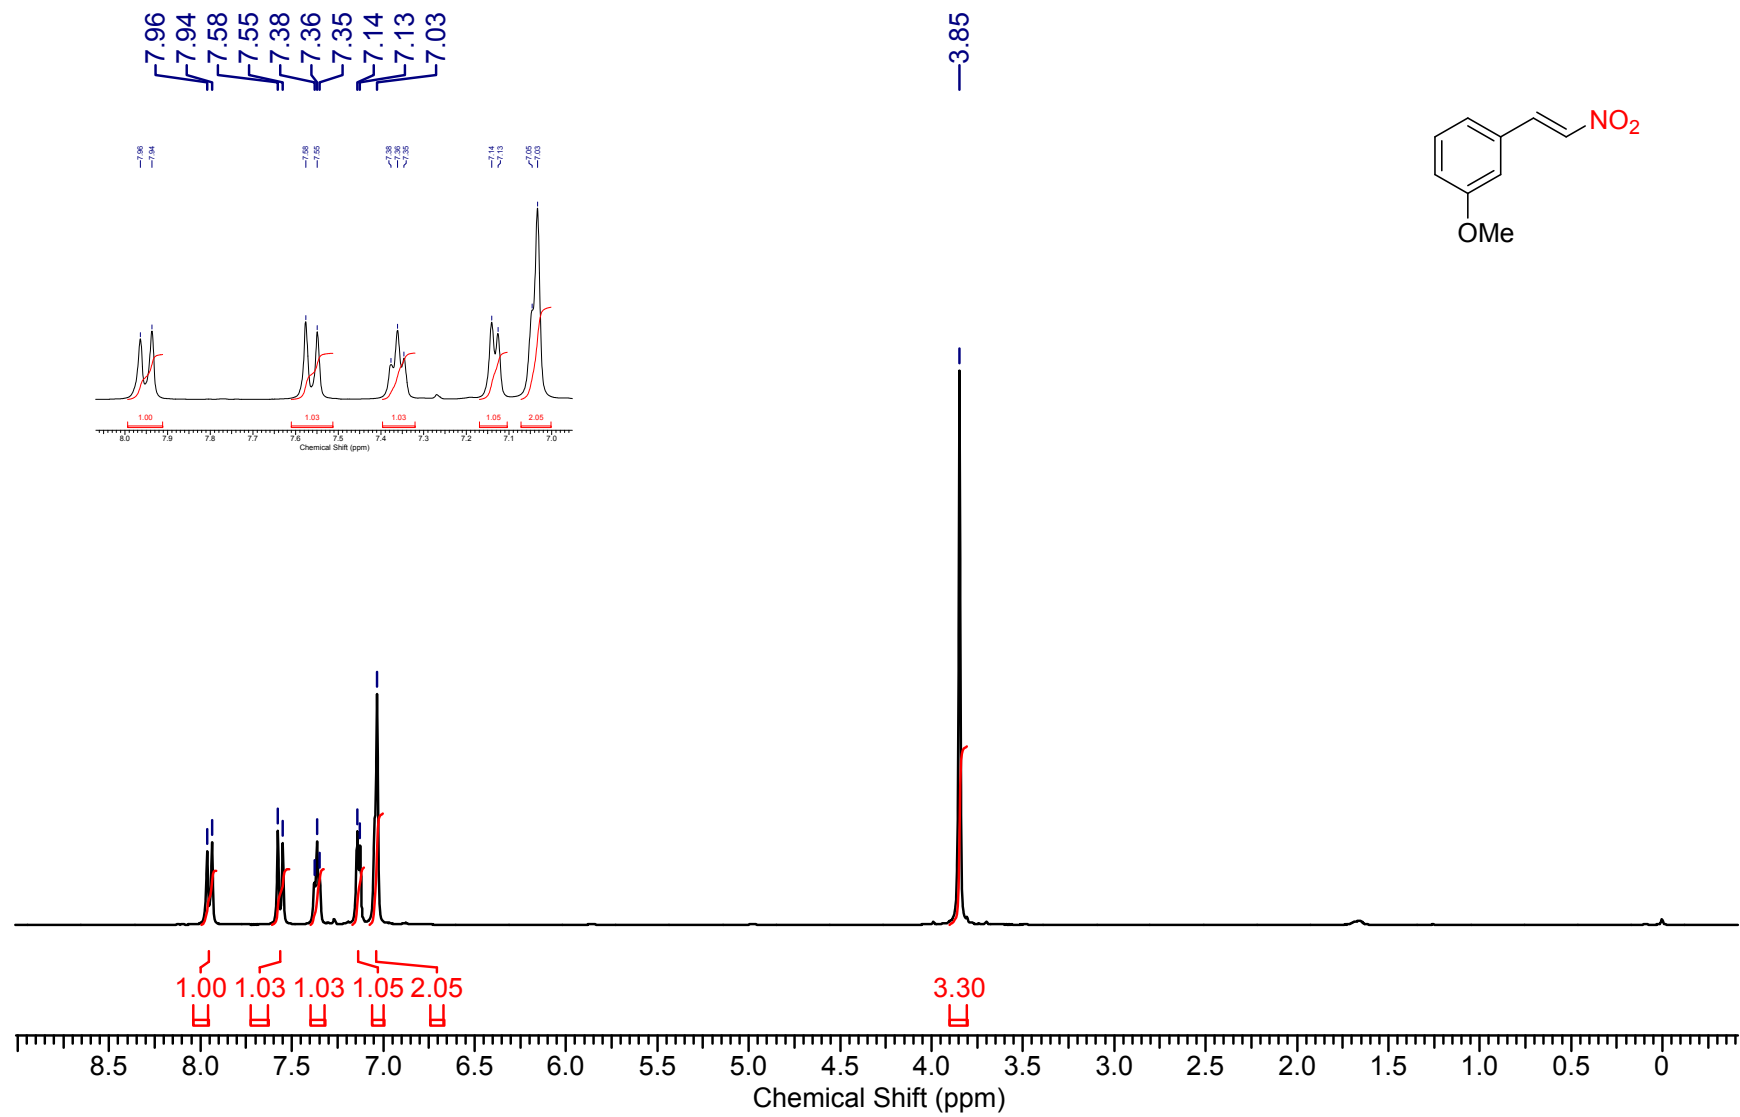

Figure S15a. <sup>1</sup>H NMR of 1j



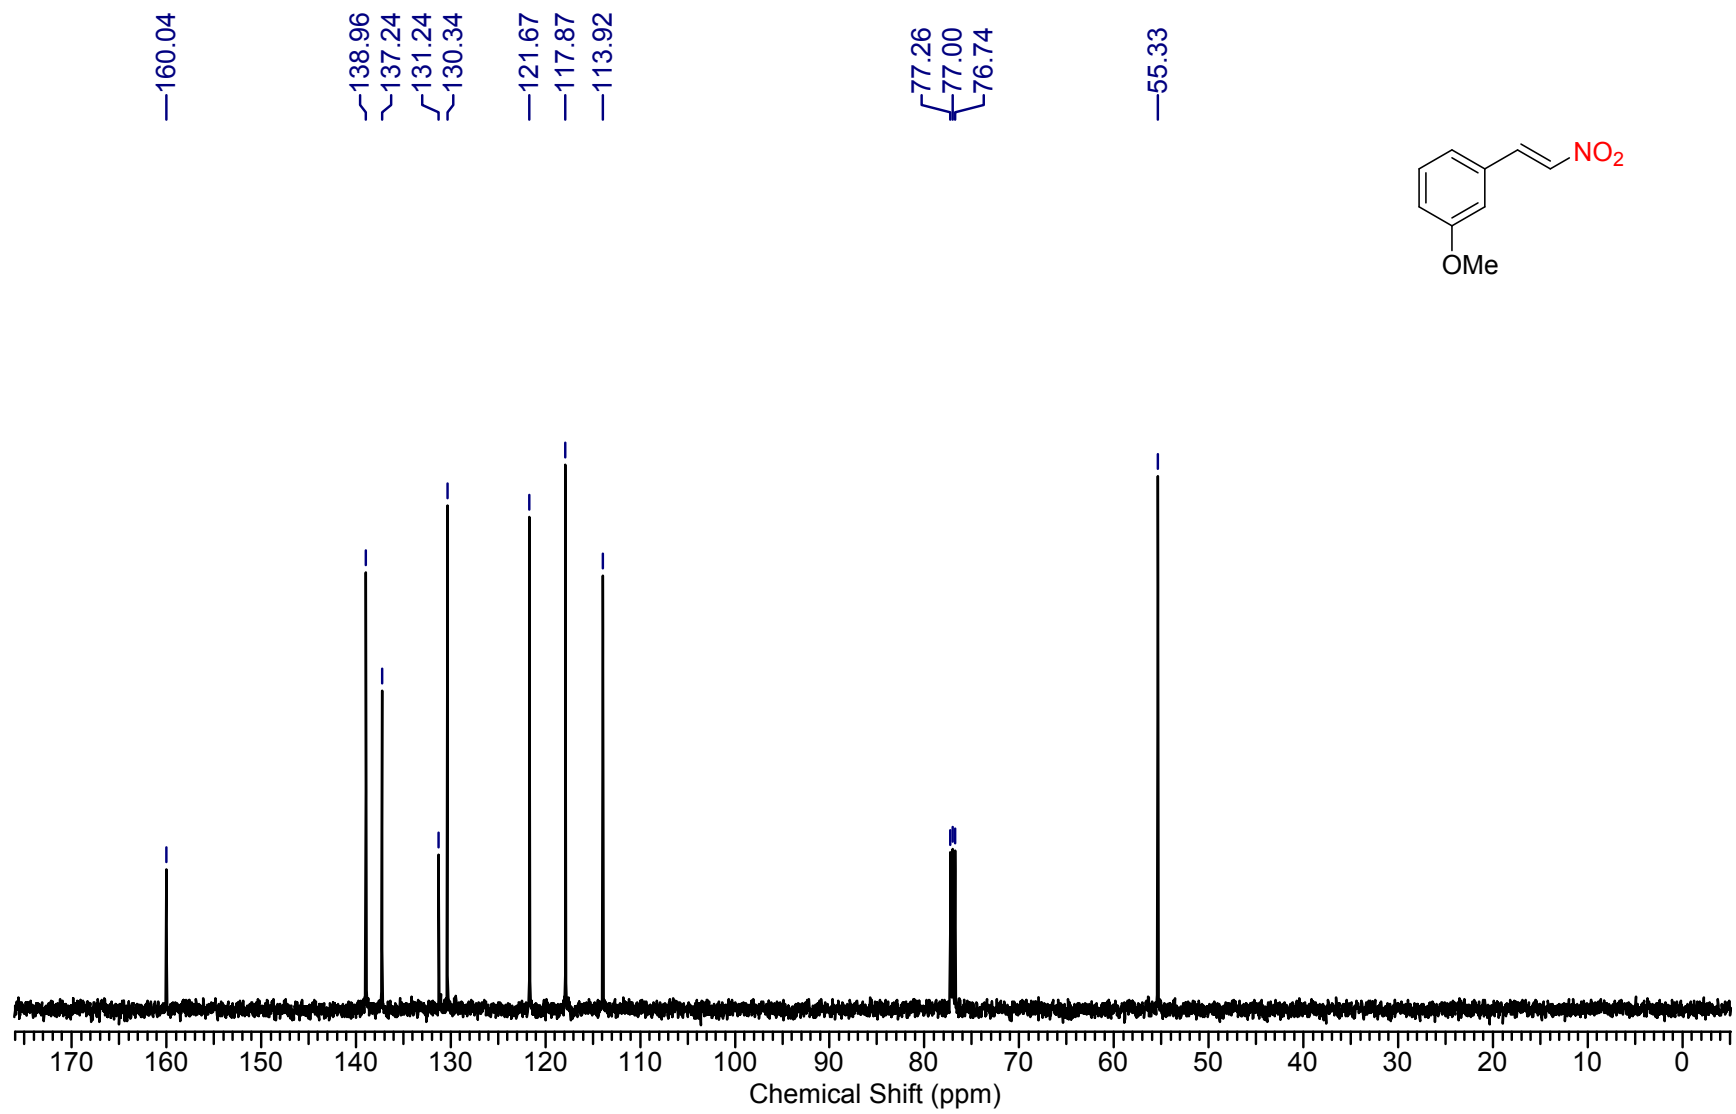

Figure S15b. <sup>13</sup>C NMR of 1j

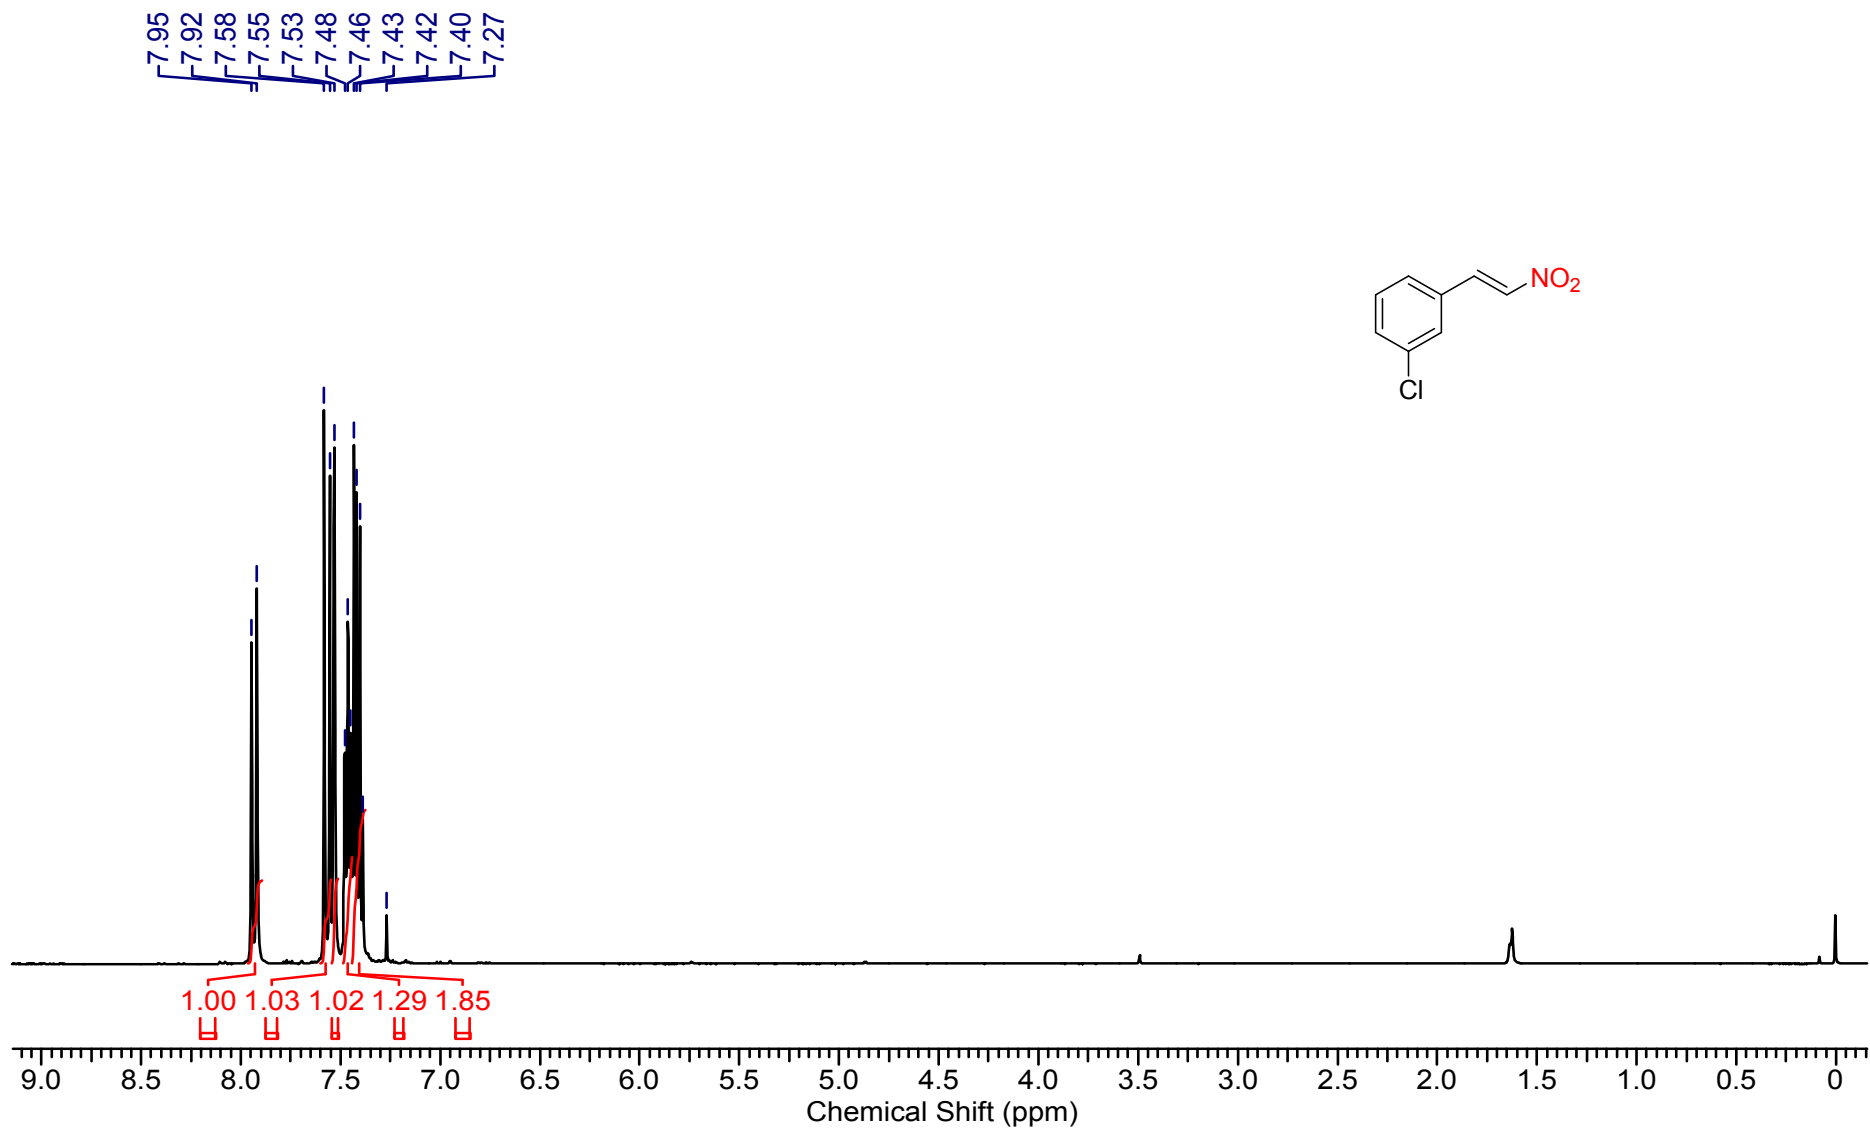

Figure S16a. <sup>1</sup>H NMR of 1k

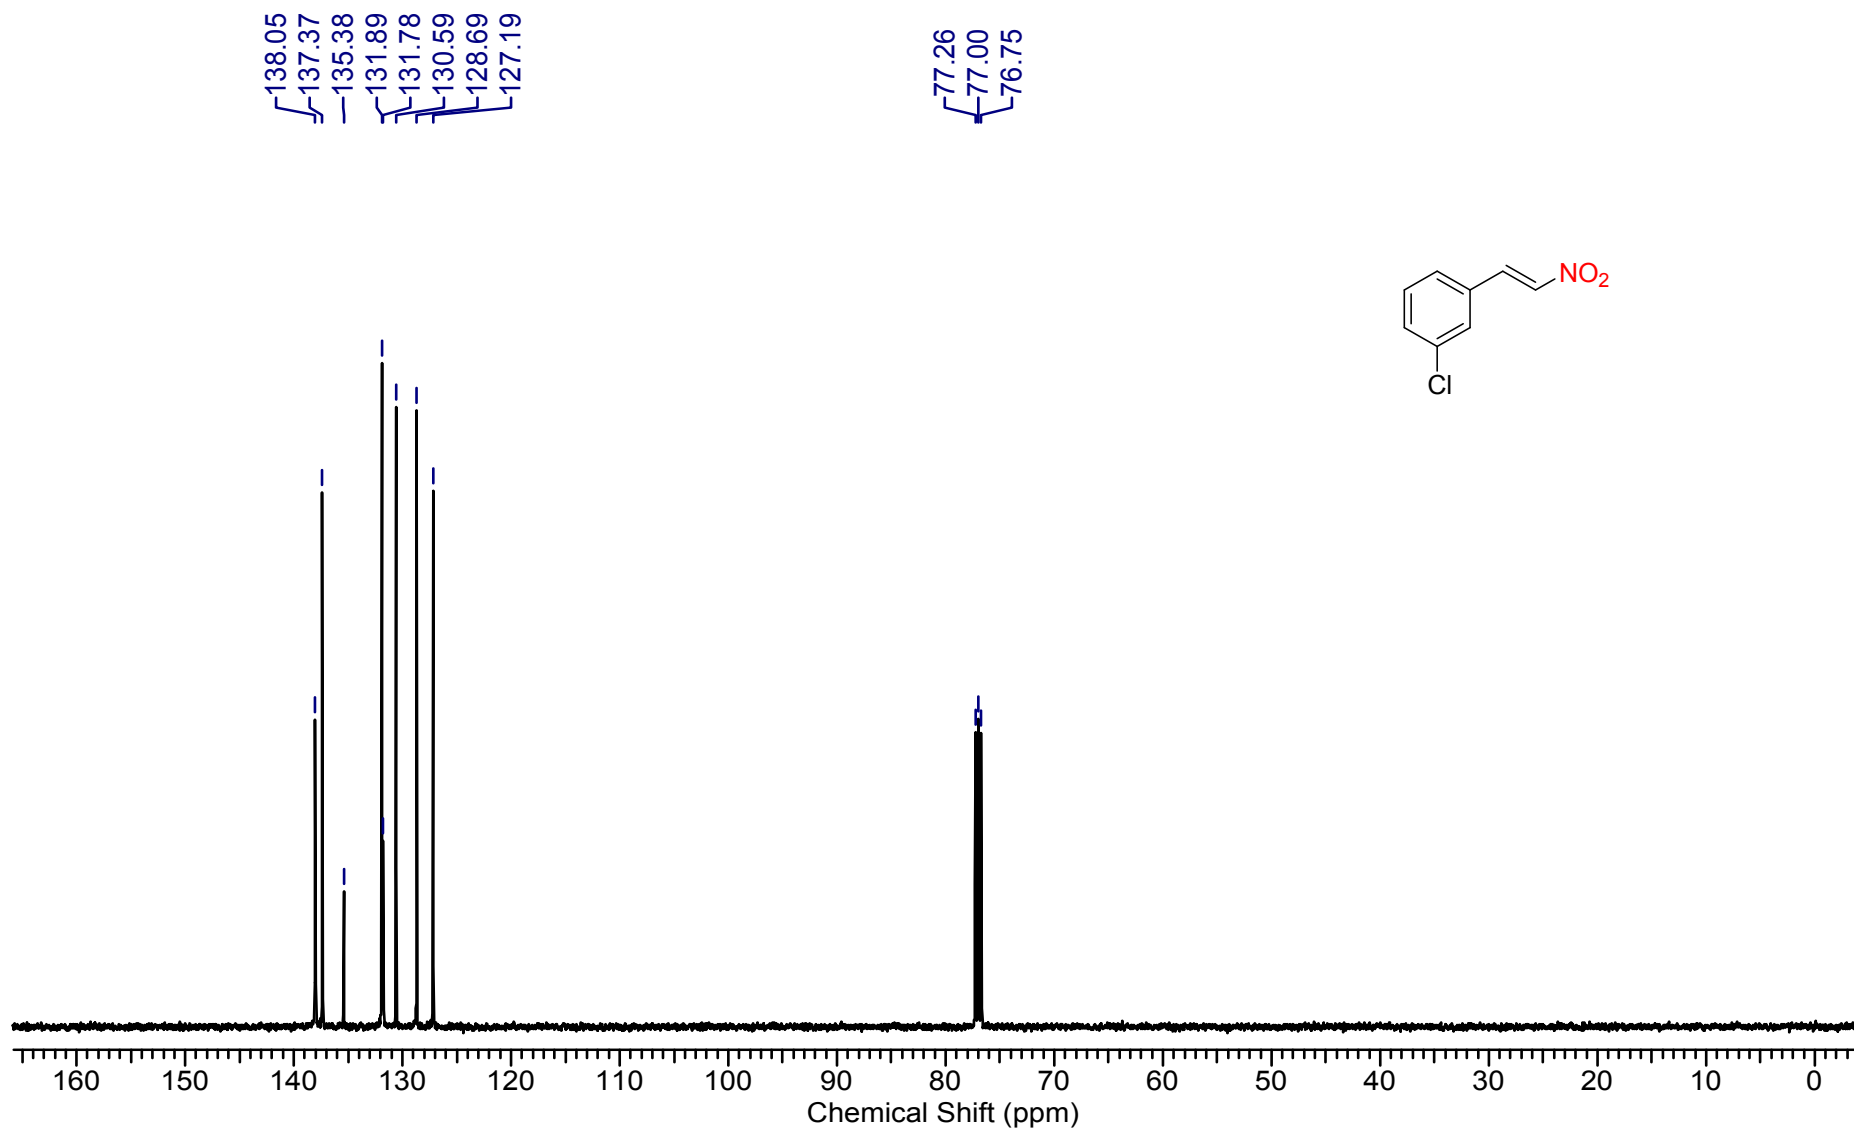

Figure S16b. <sup>13</sup>C NMR of 1k

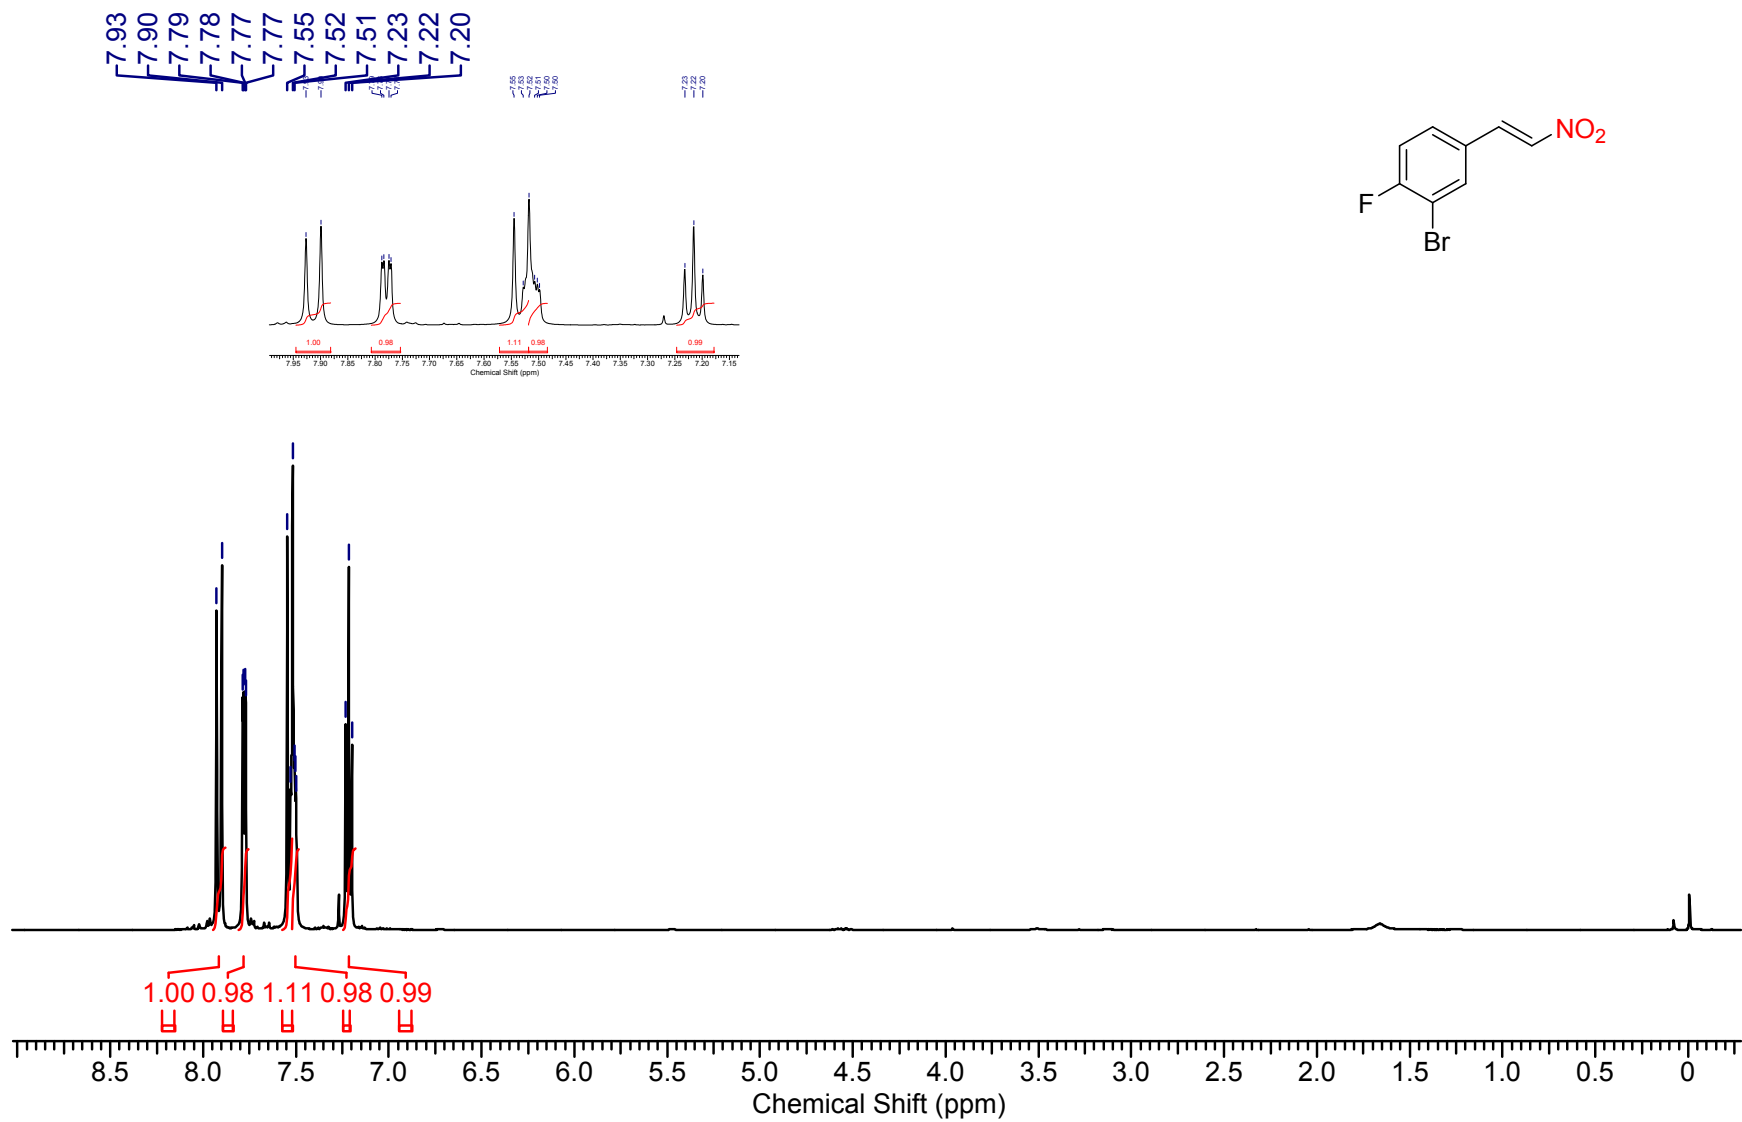

Figure S17a. <sup>1</sup>H NMR of 11

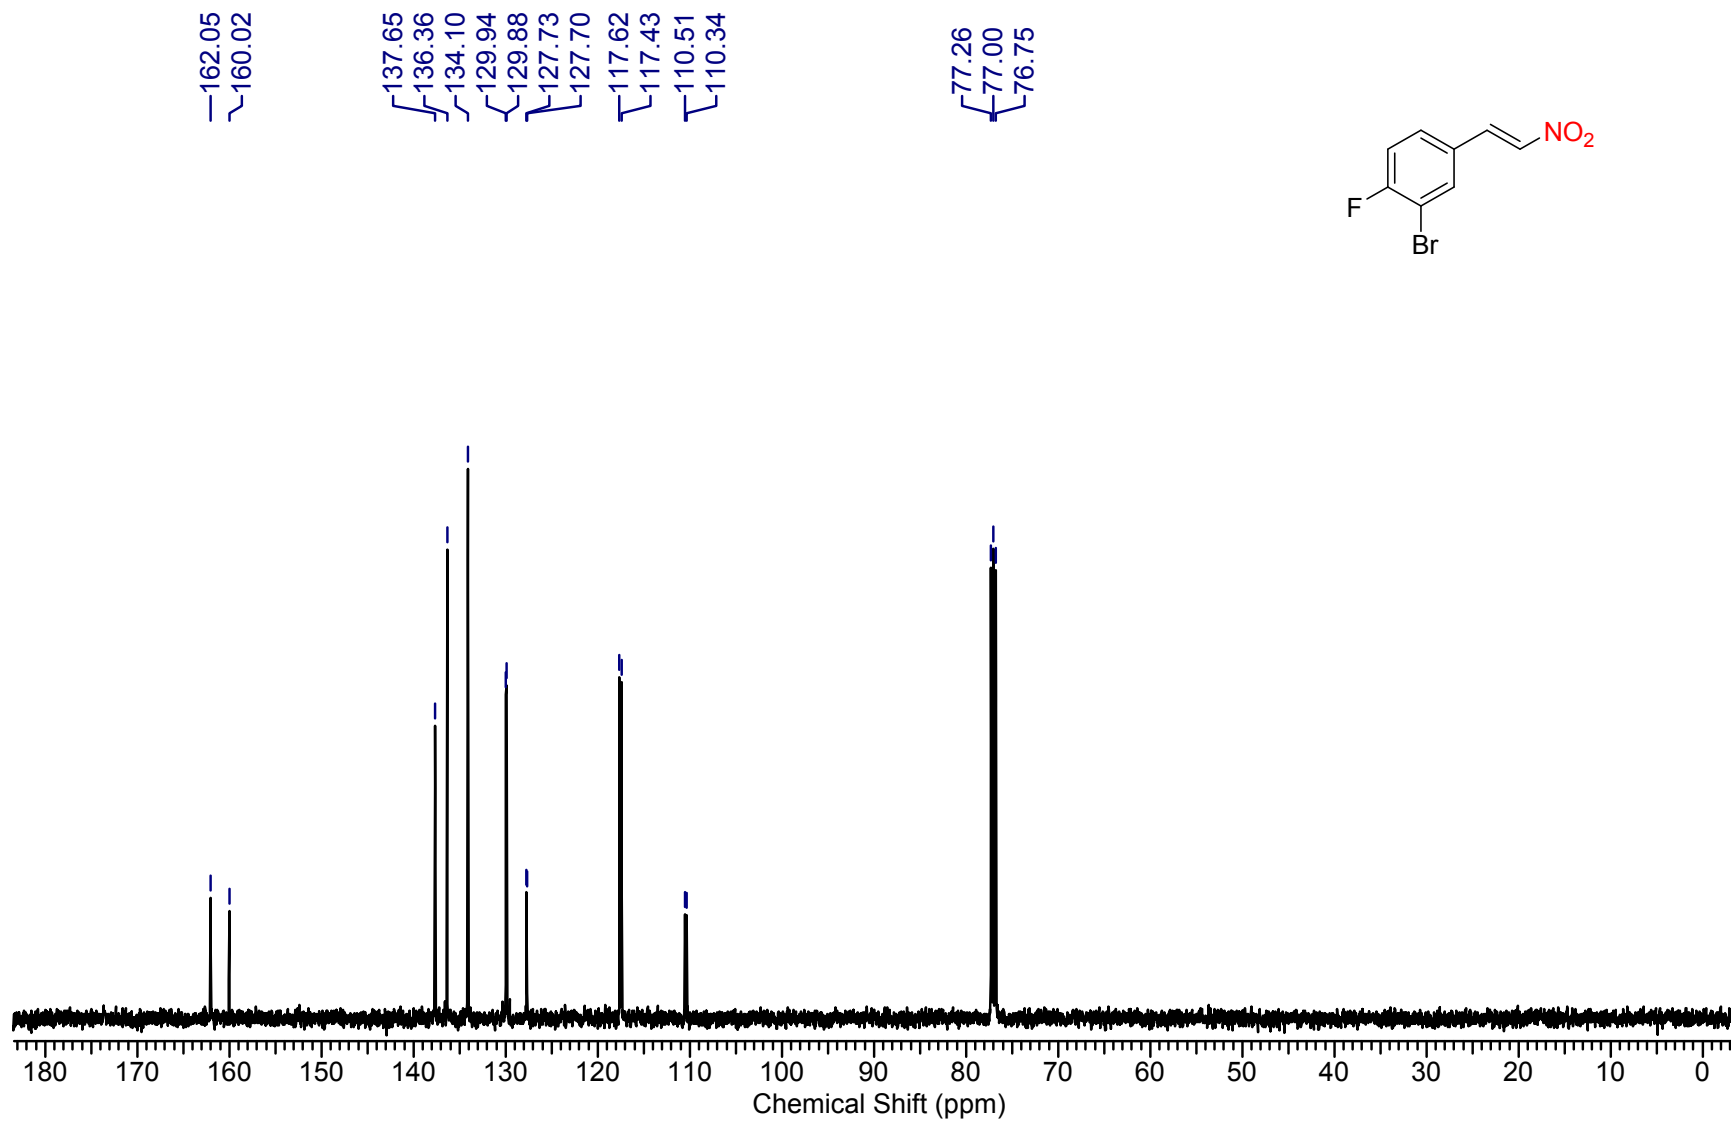

Figure S17b.  $^{13}\text{C}$  NMR of 11

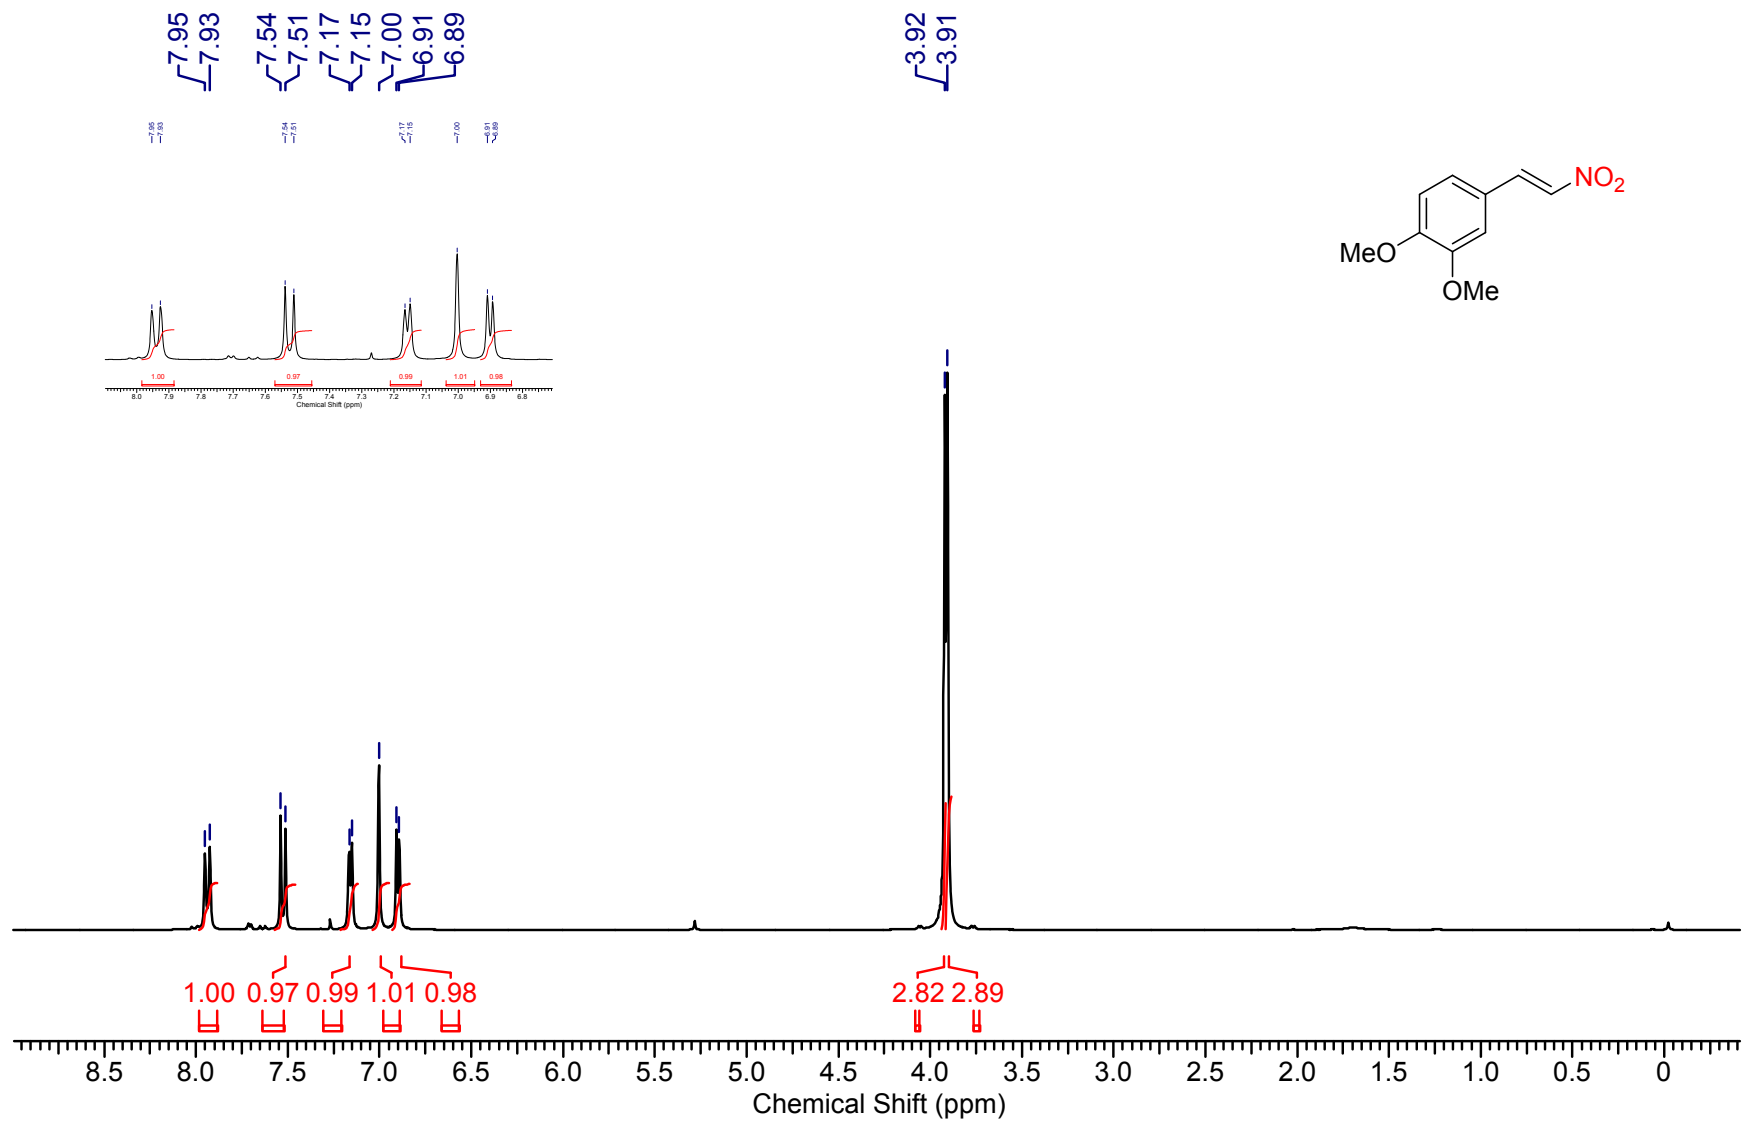

Figure S18a. <sup>1</sup>H NMR of 1m

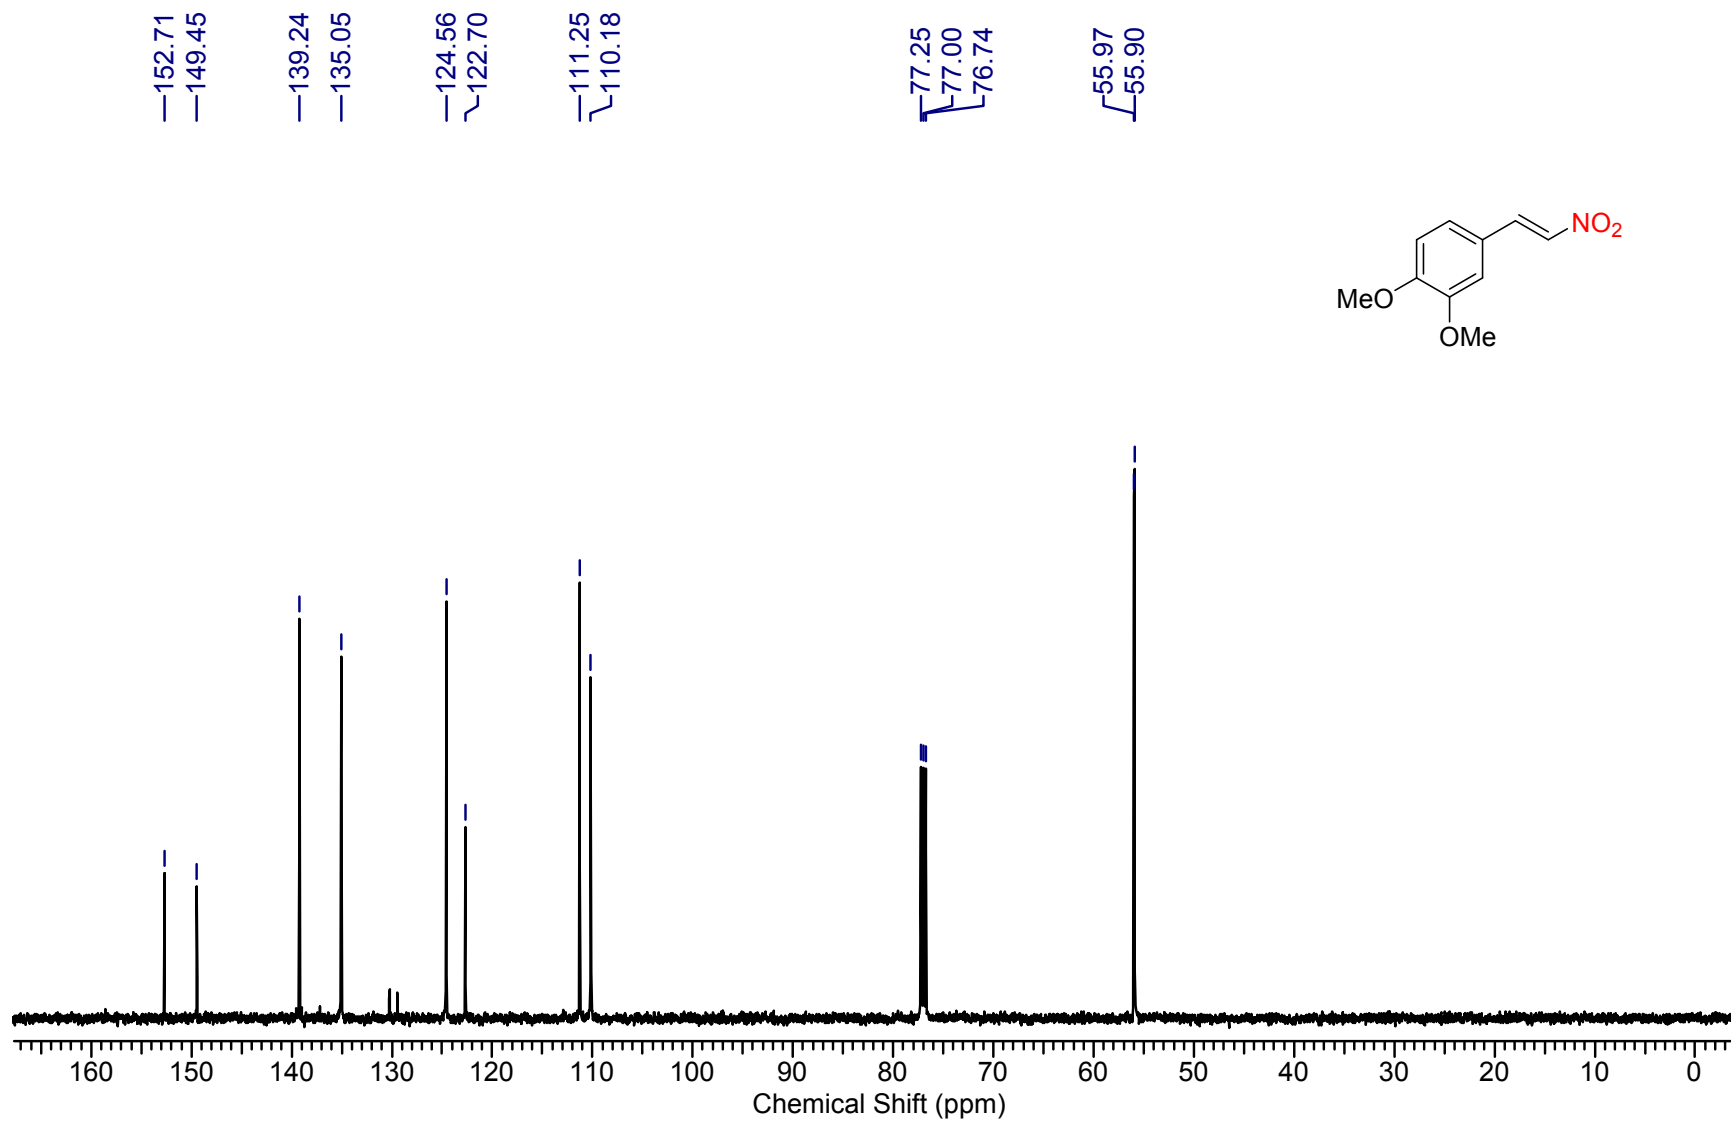

Figure S18b.  $^{13}\text{C}$  NMR of **1m**

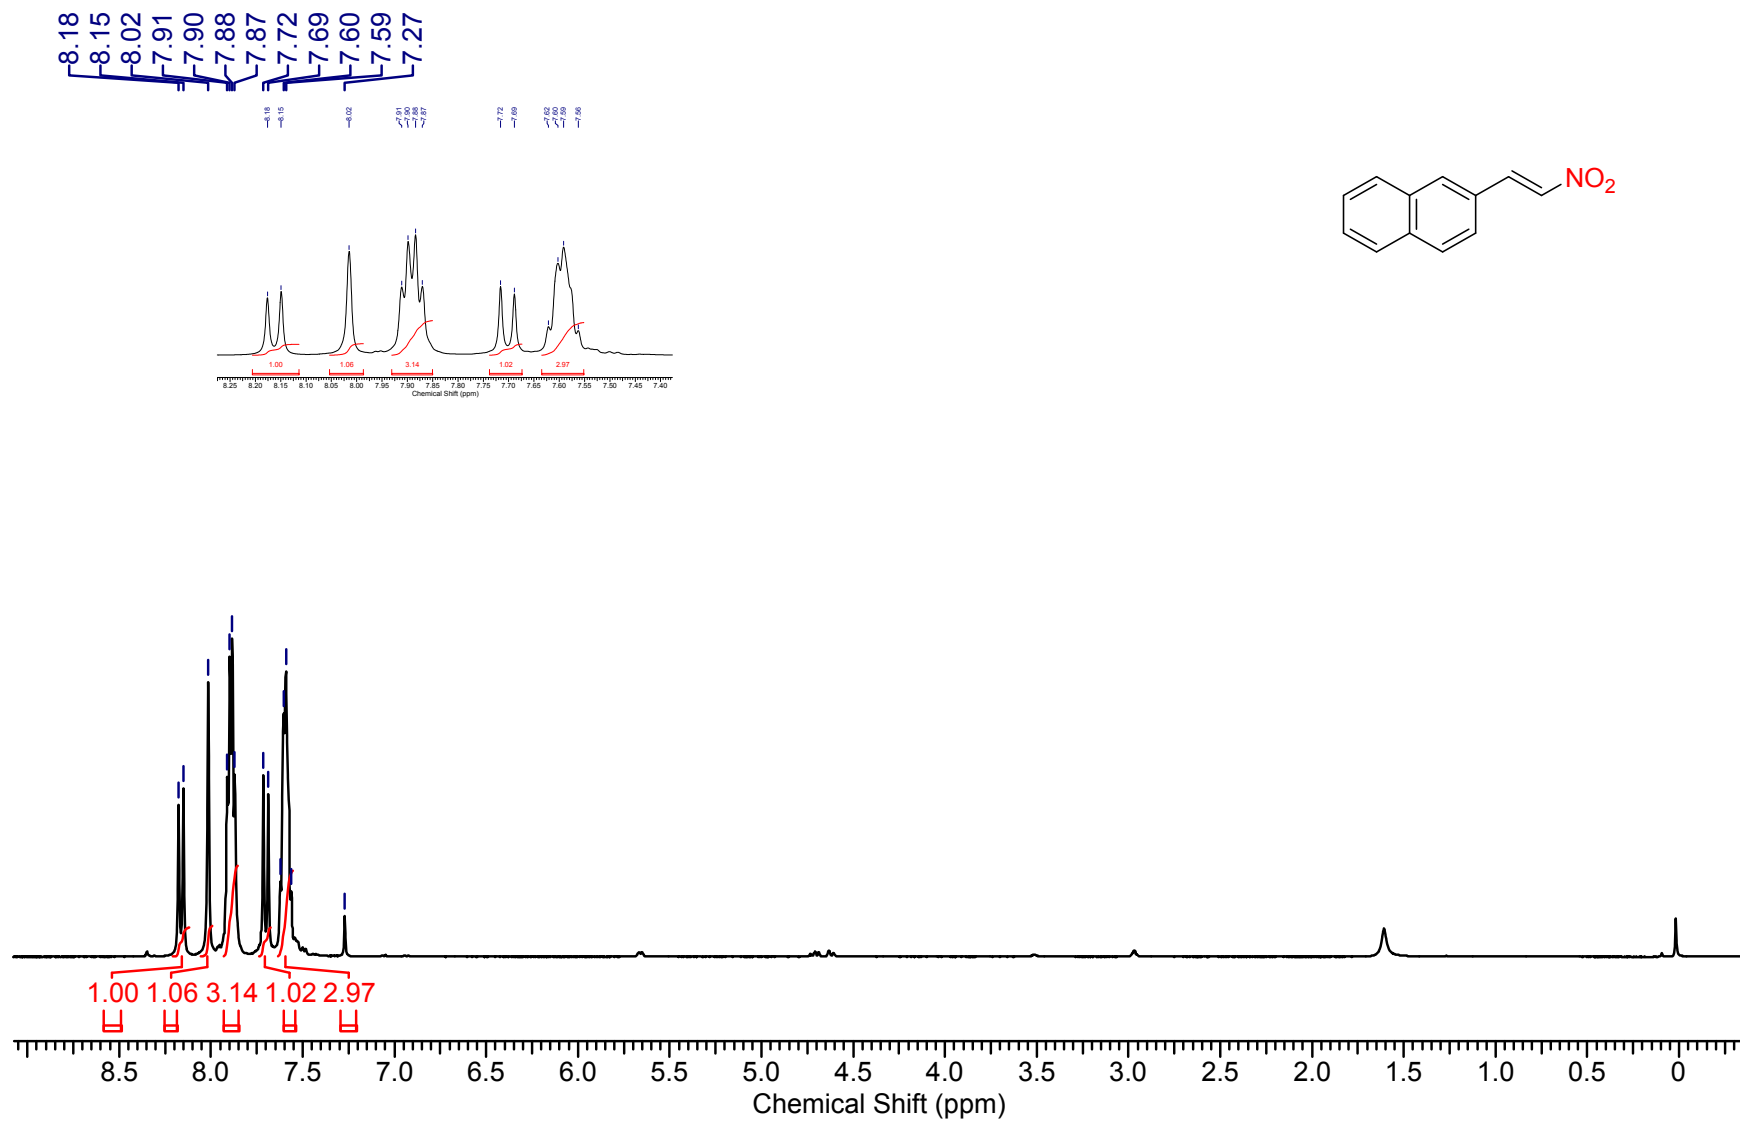

Figure S19a. <sup>1</sup>H NMR of **1n**



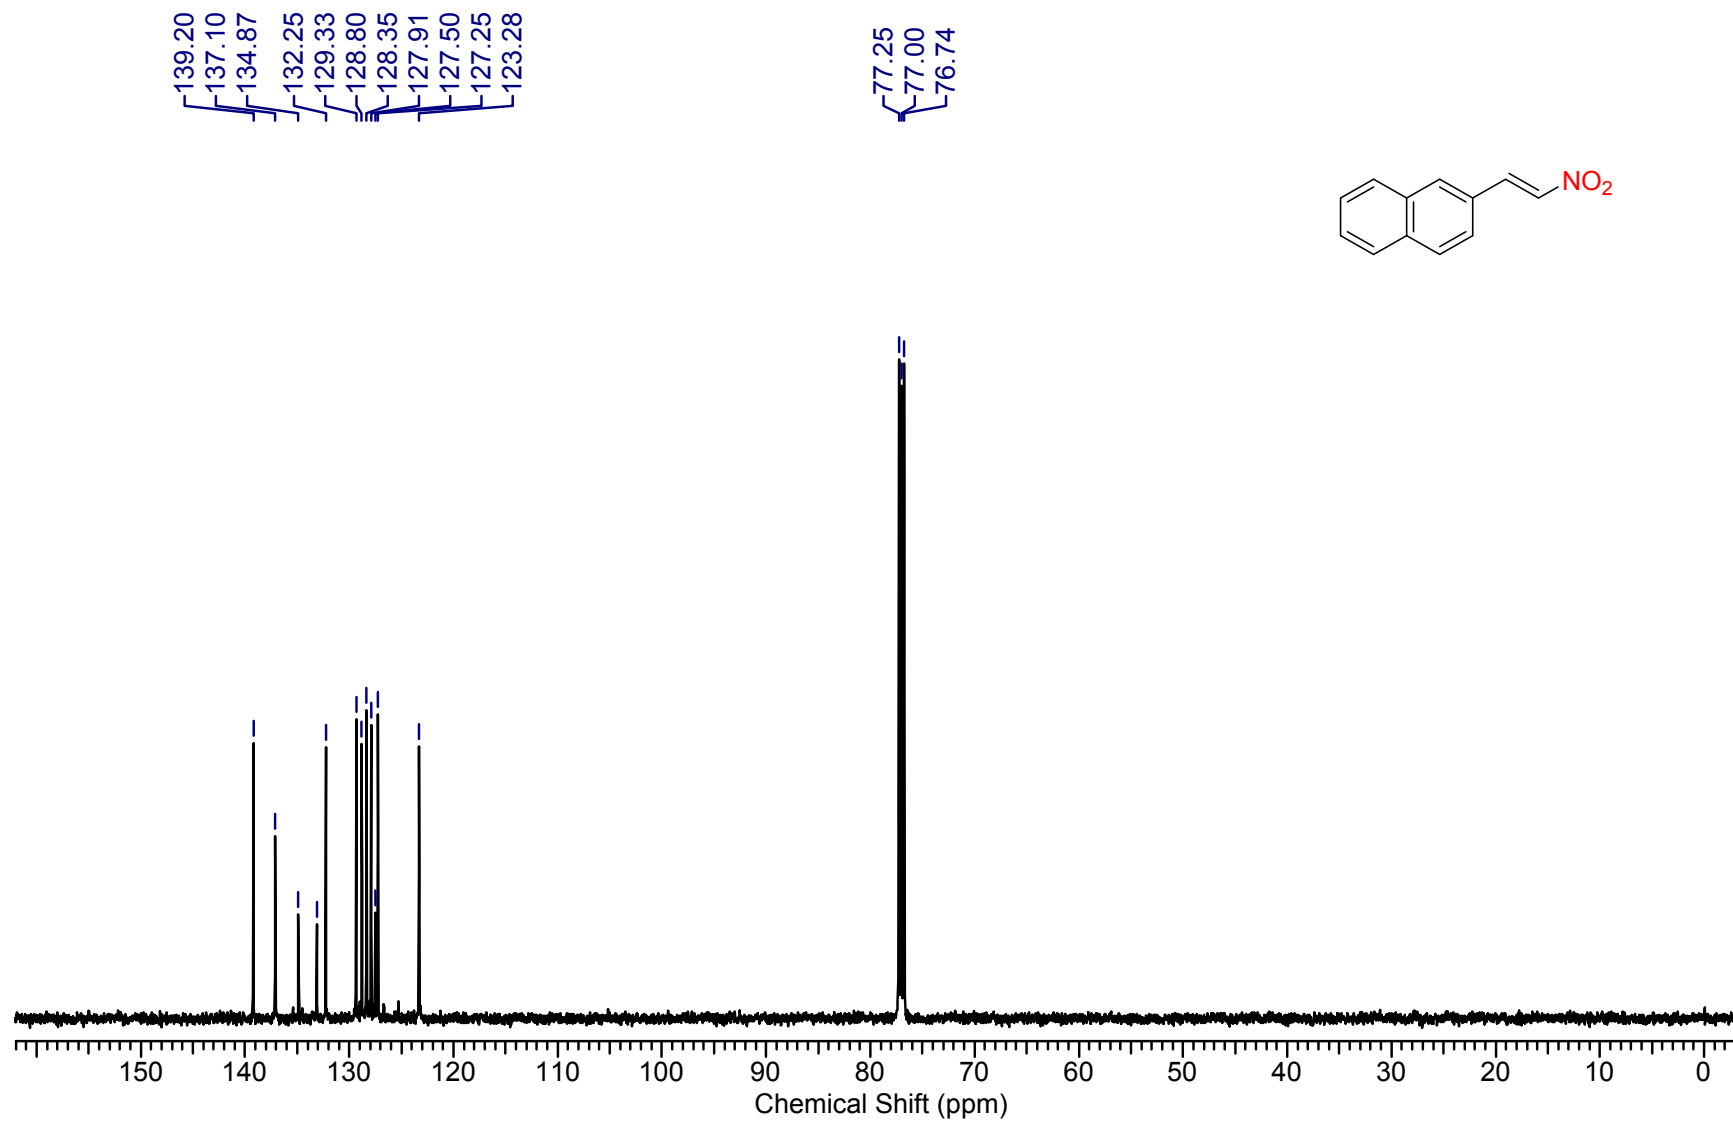

Figure S19b.  $^{13}\text{C}$  NMR of **1n**

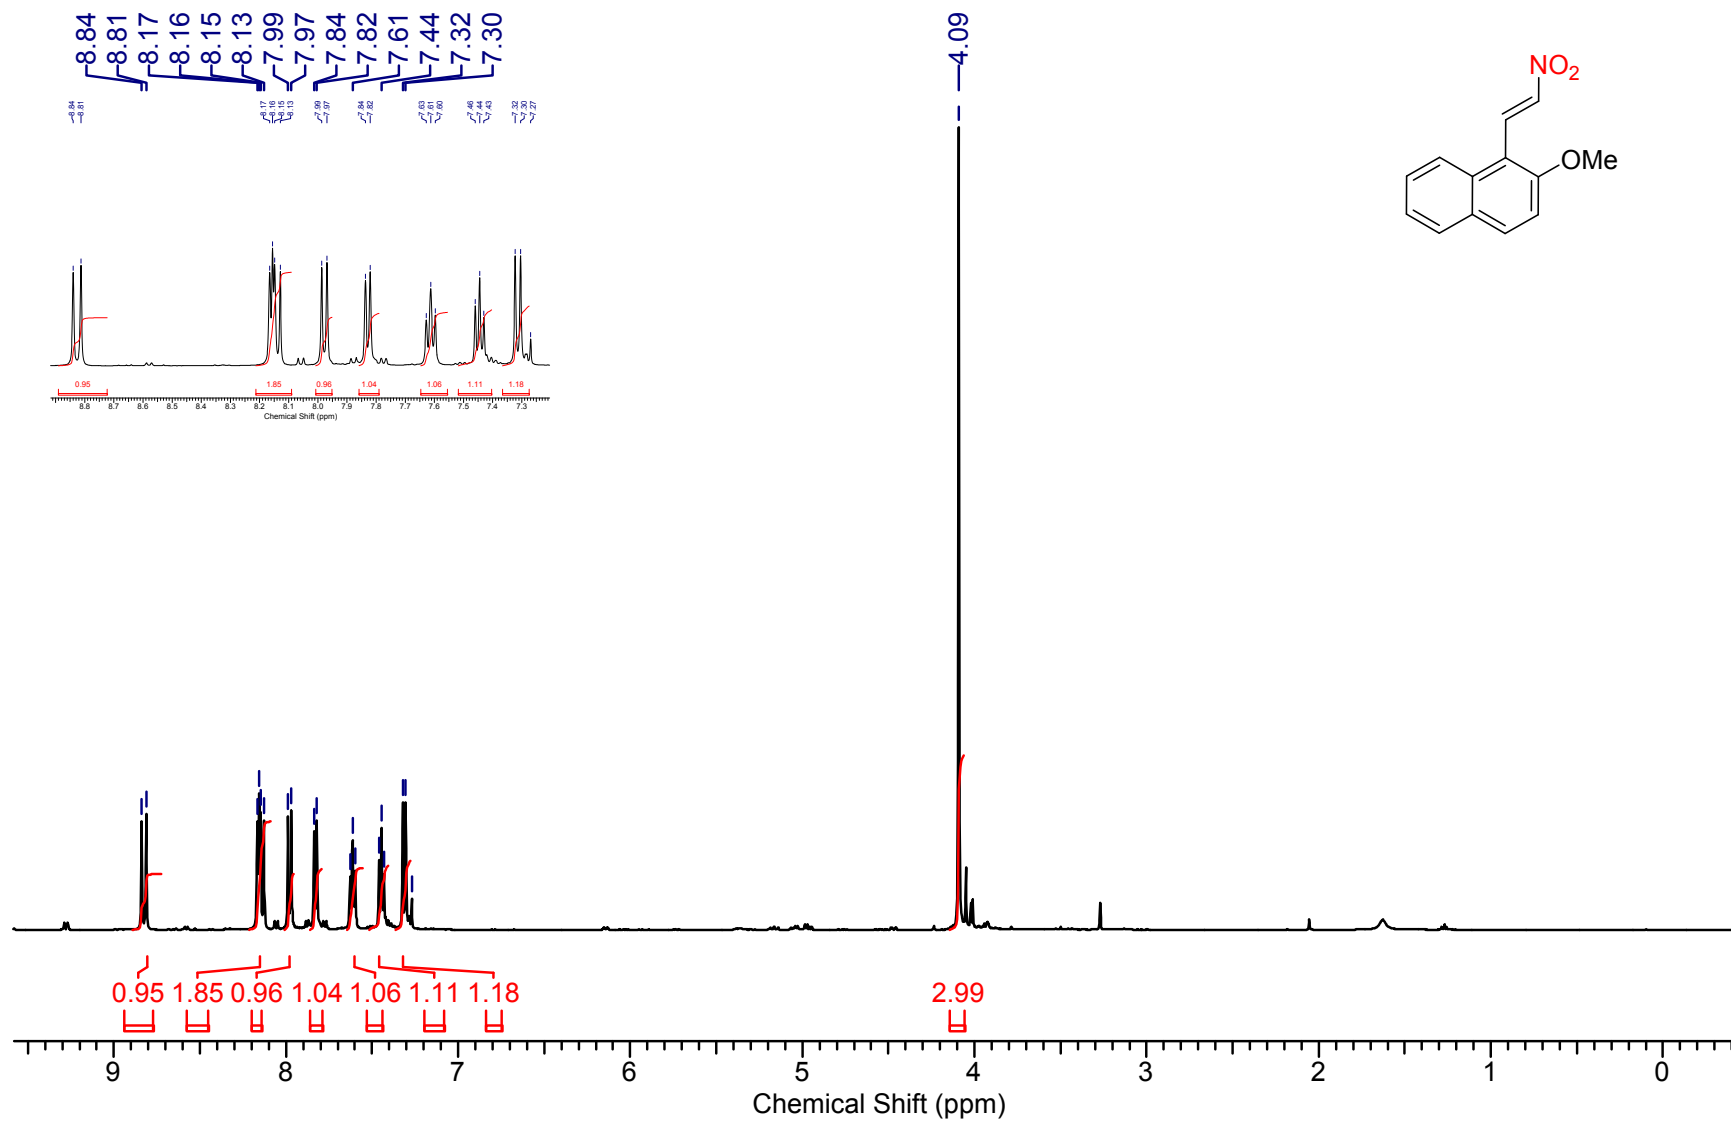

Figure S20a.  $^1\text{H}$  NMR of **10**

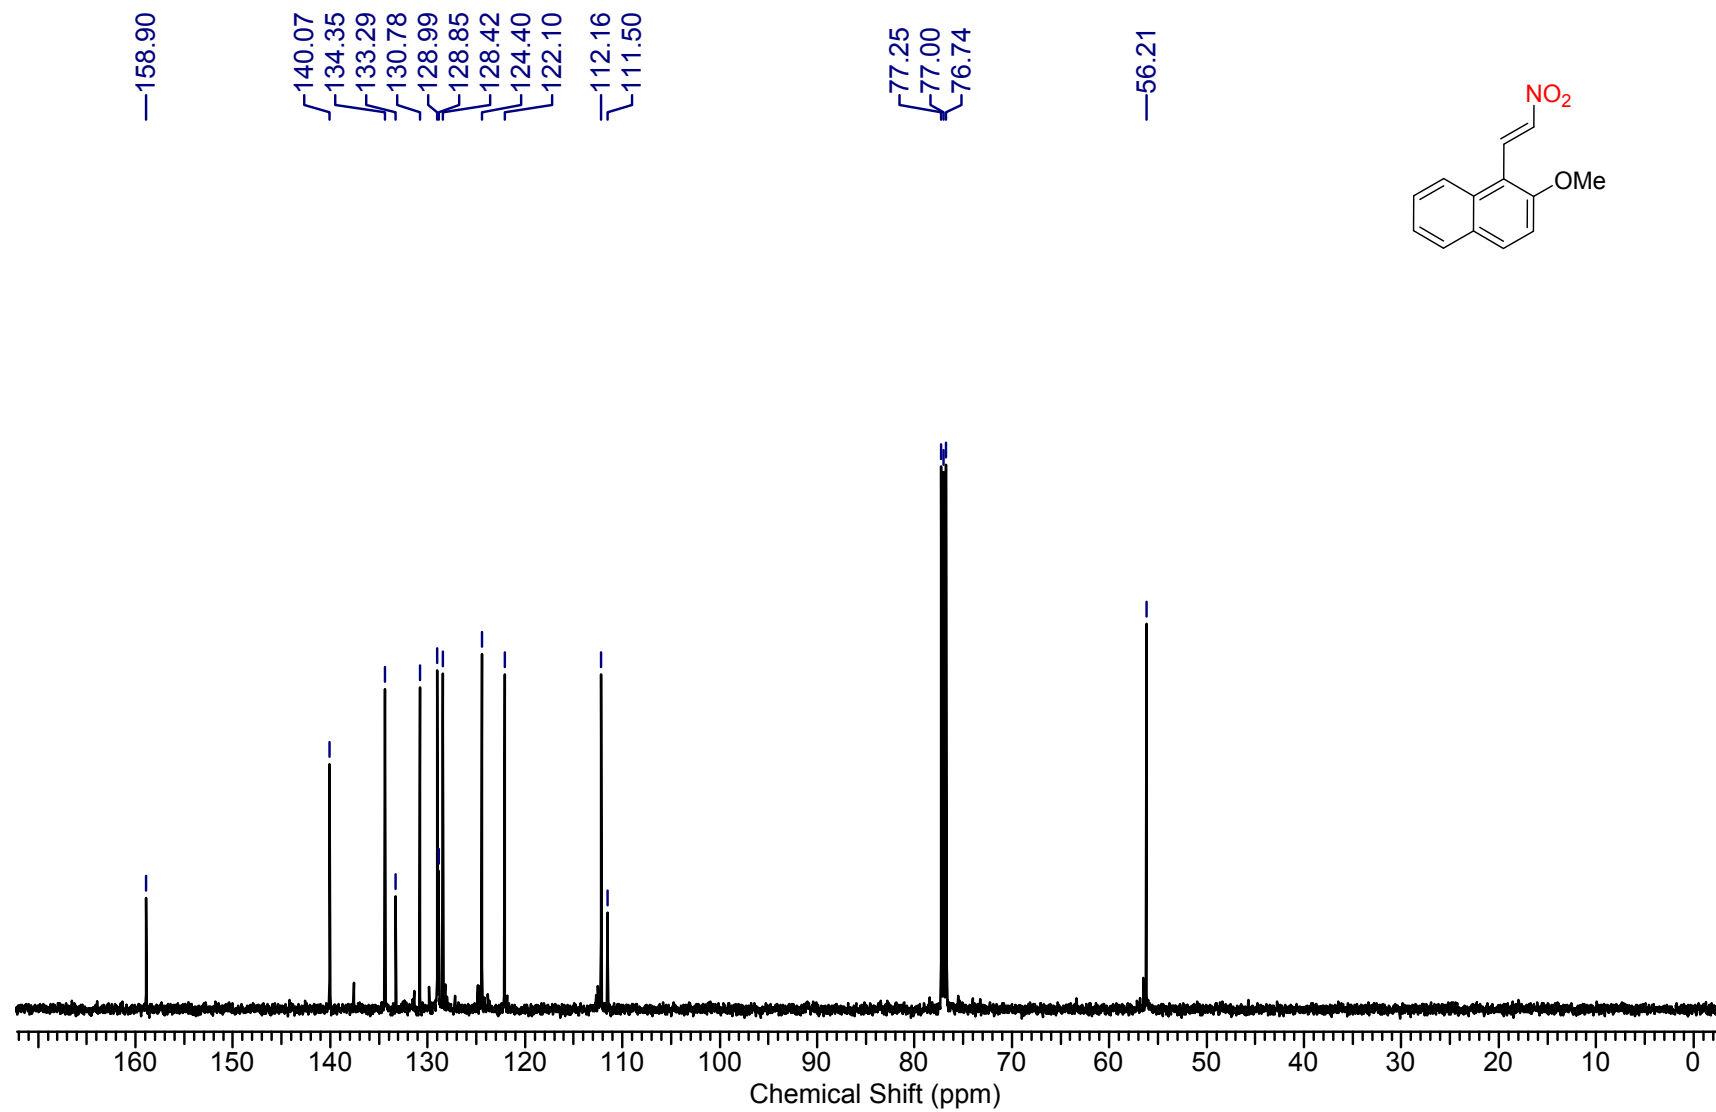

Figure S20b. <sup>13</sup>C NMR of 1o

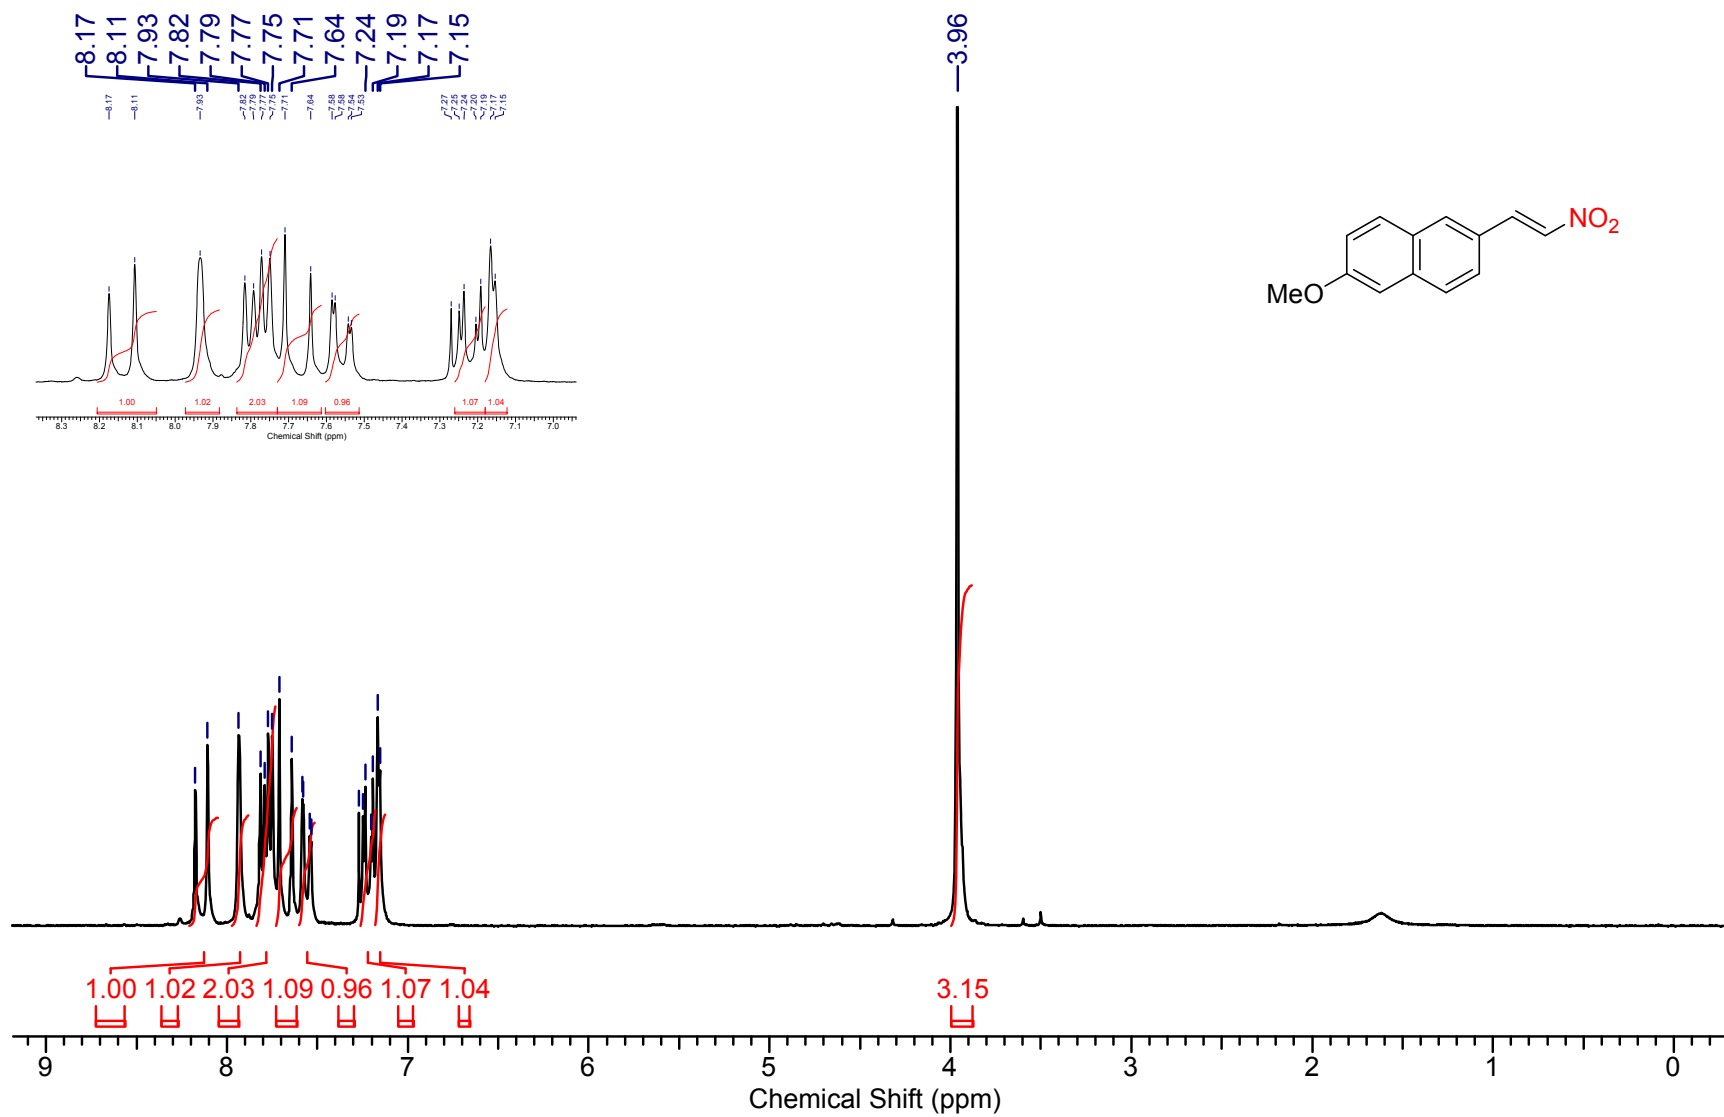

Figure S21a. <sup>1</sup>H NMR of 1p

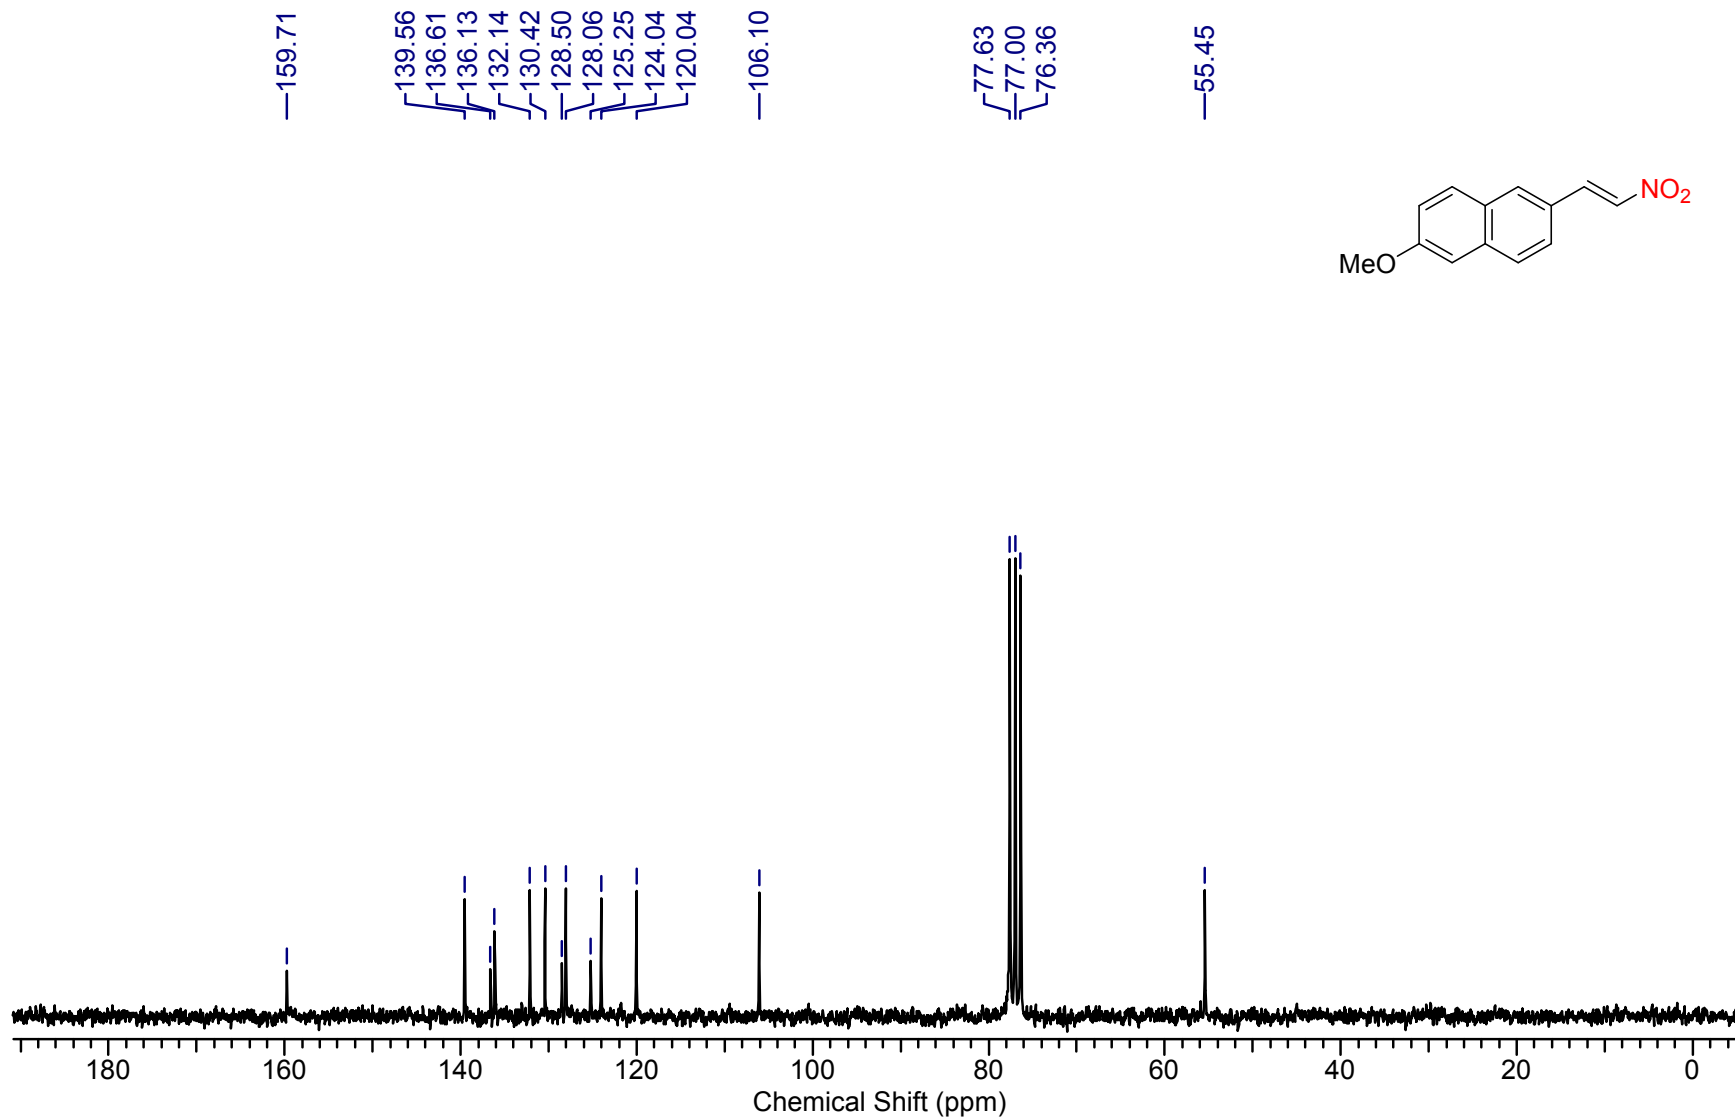

Figure S21b. <sup>13</sup>C NMR of 1p

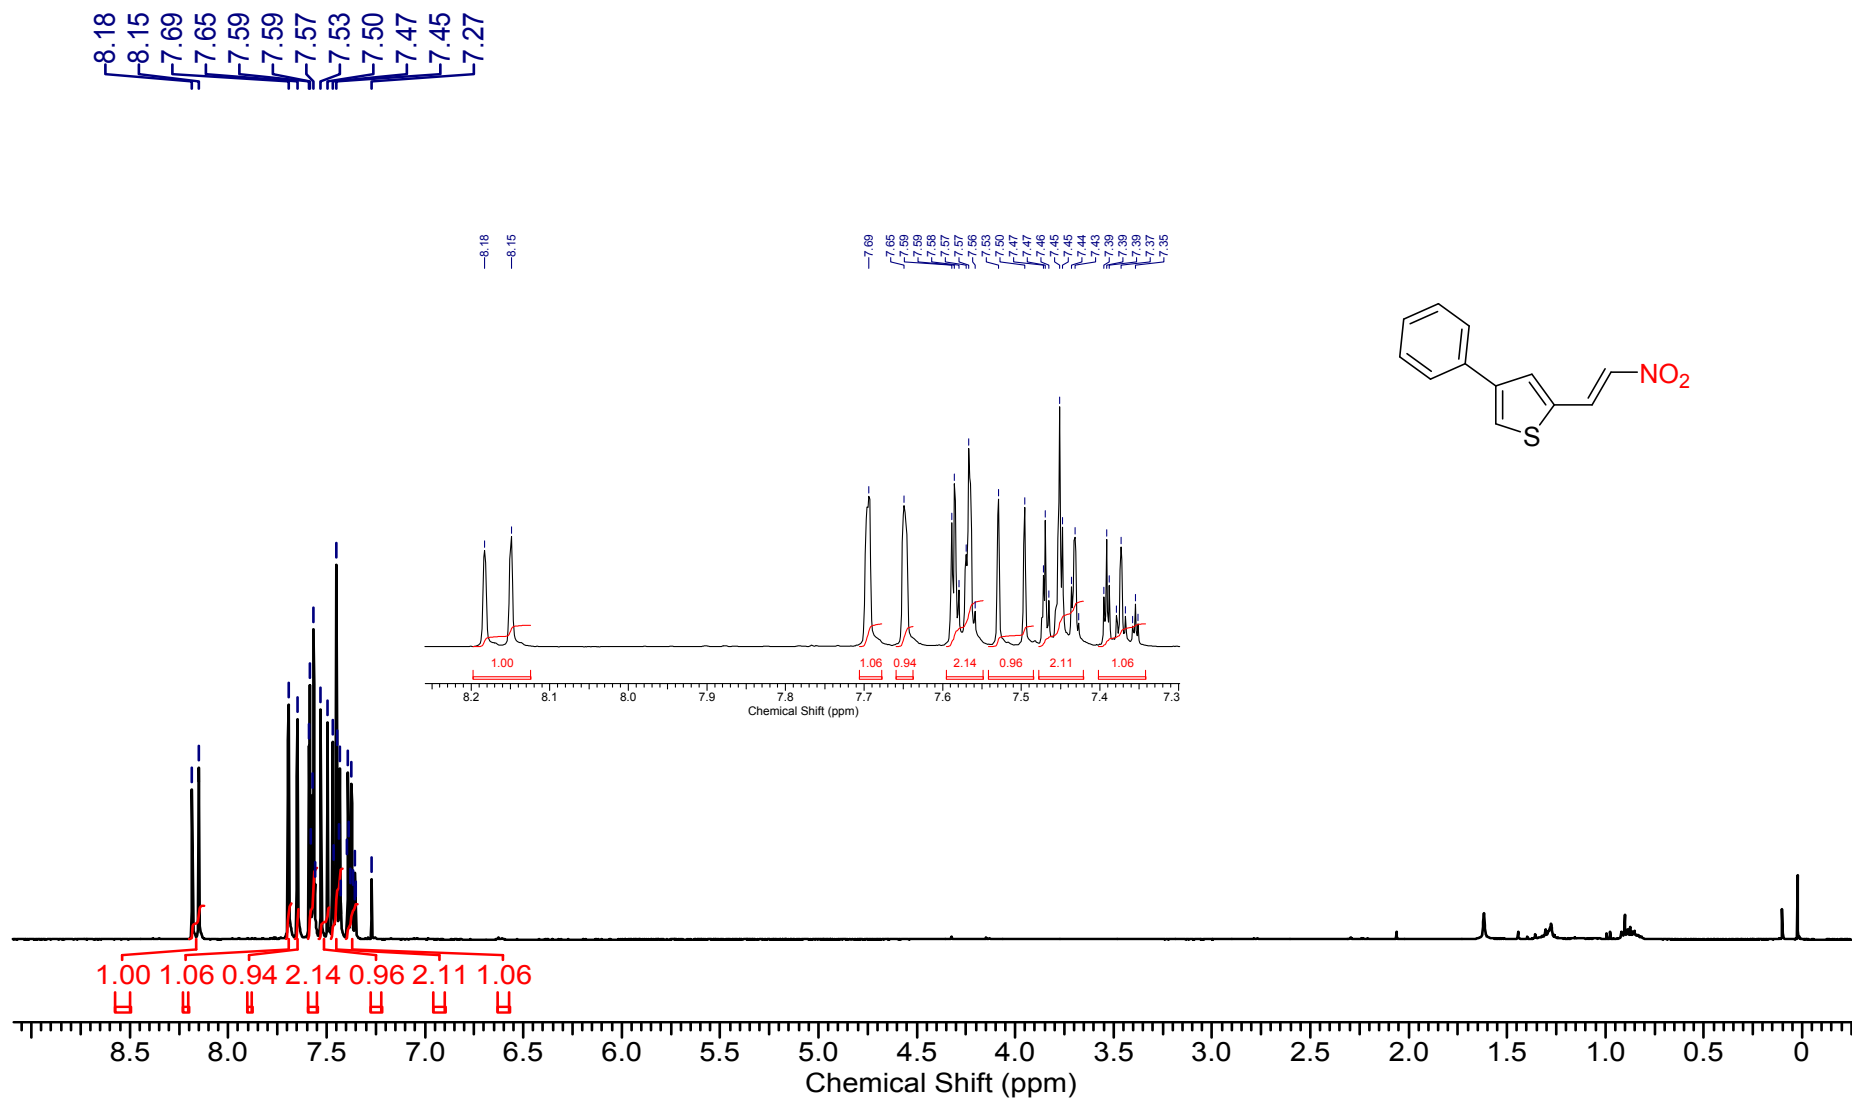

Figure S22a.  $^1\text{H}$  NMR of 1r

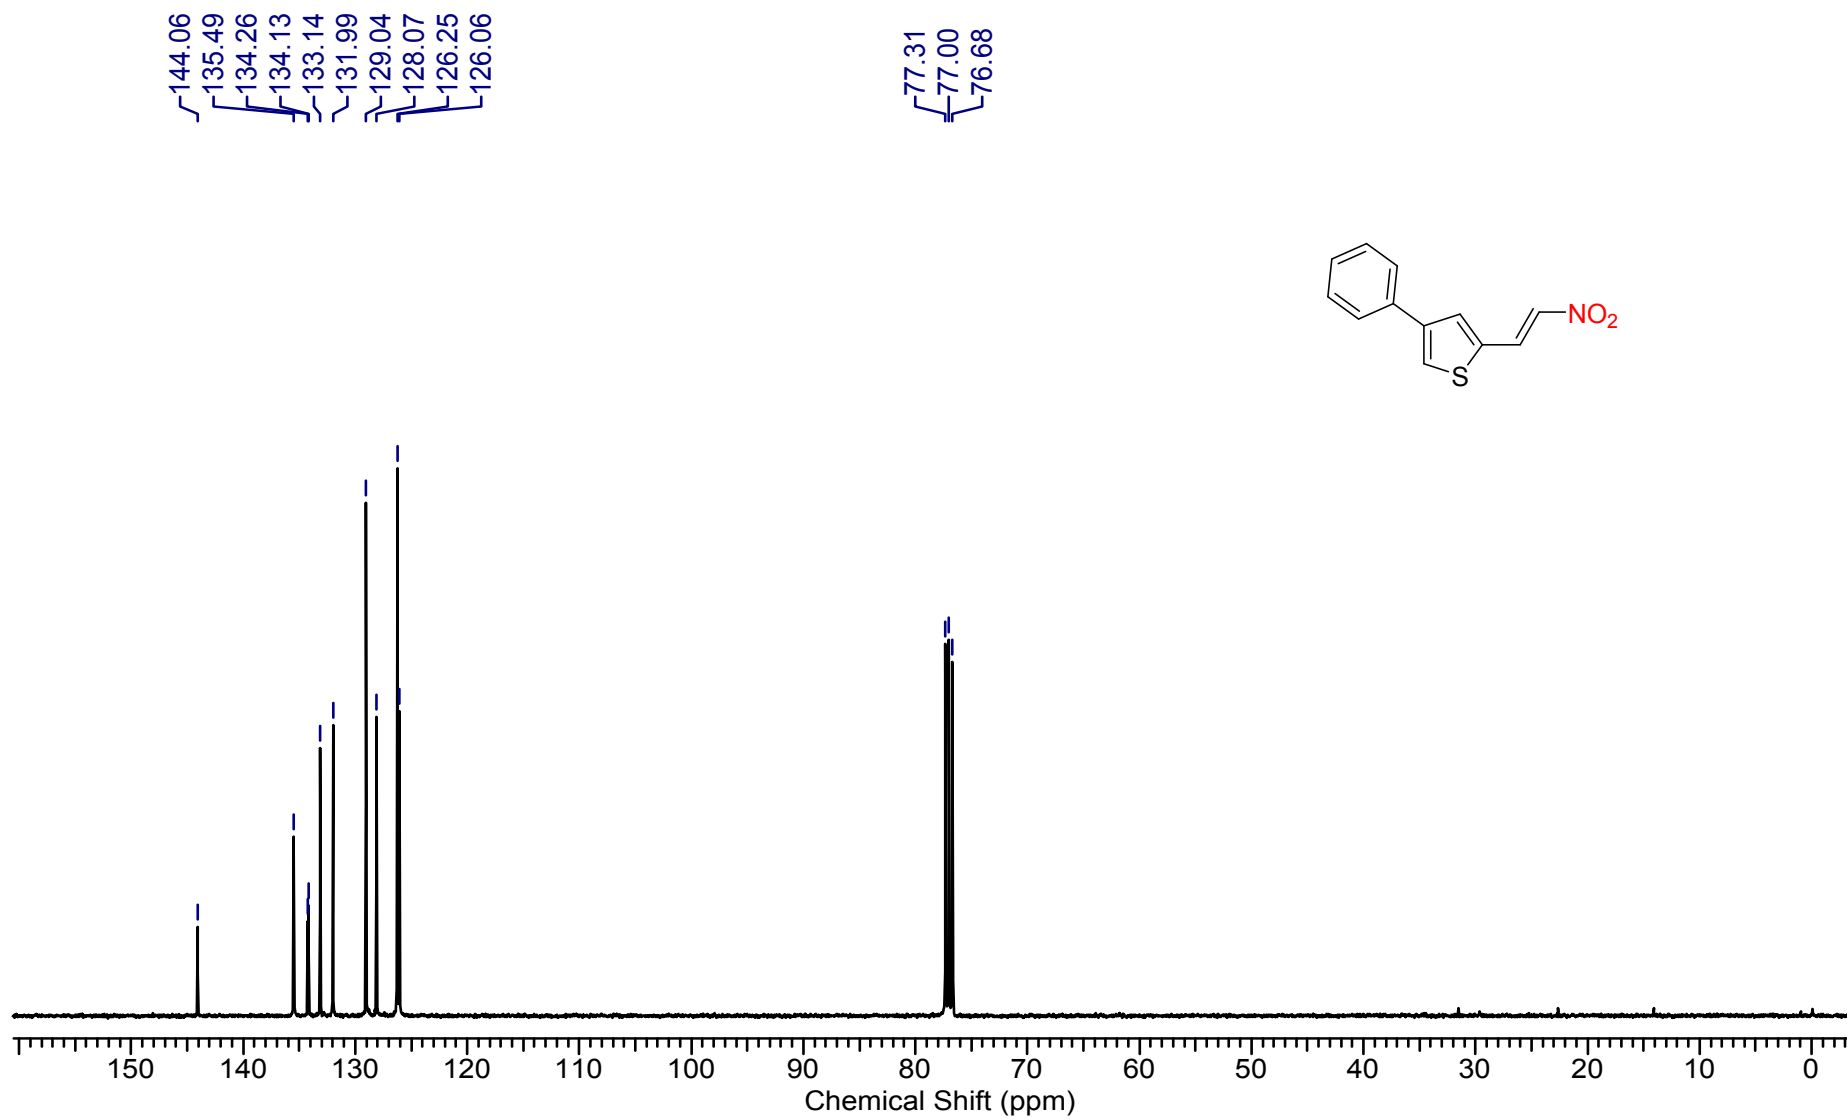

Figure S22b.  $^{13}\text{C}$  NMR of **1r**

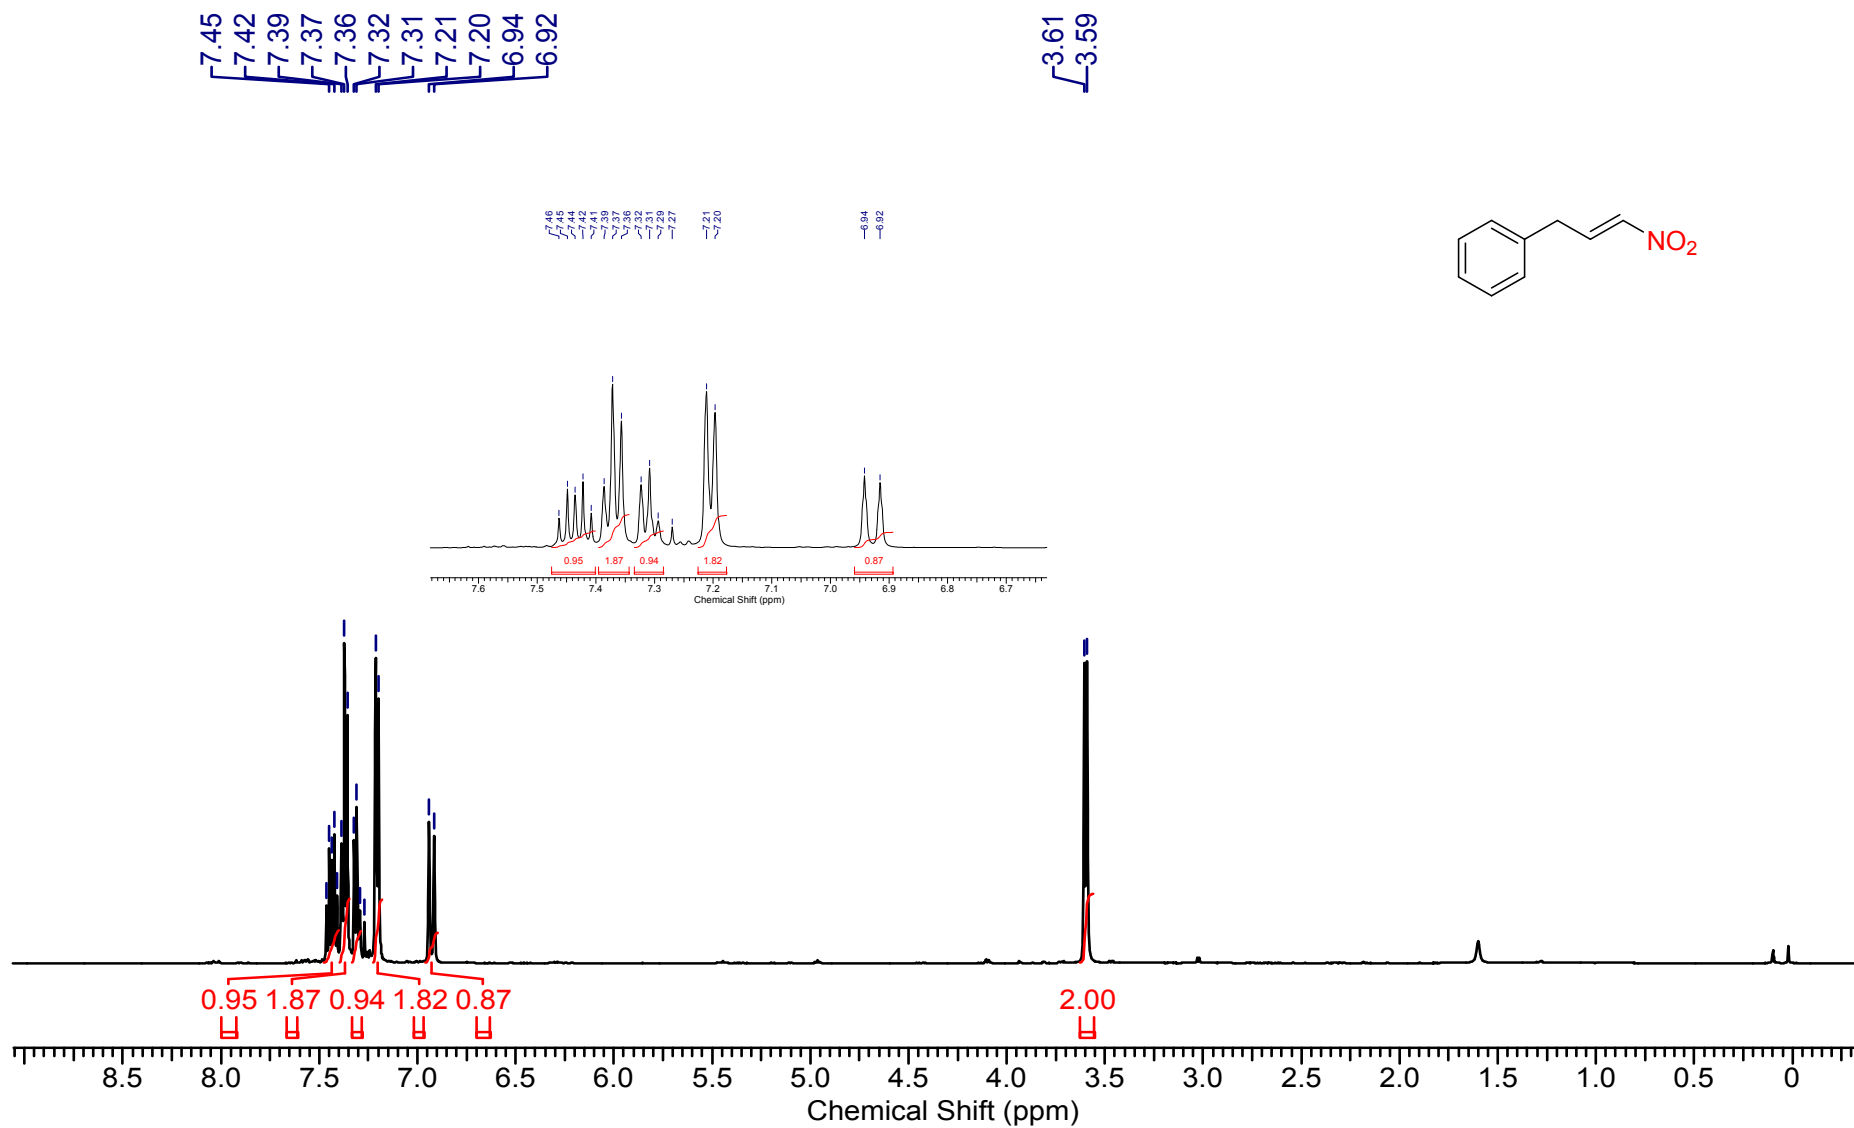

Figure S23a.  $^1\text{H}$  NMR of **1s**



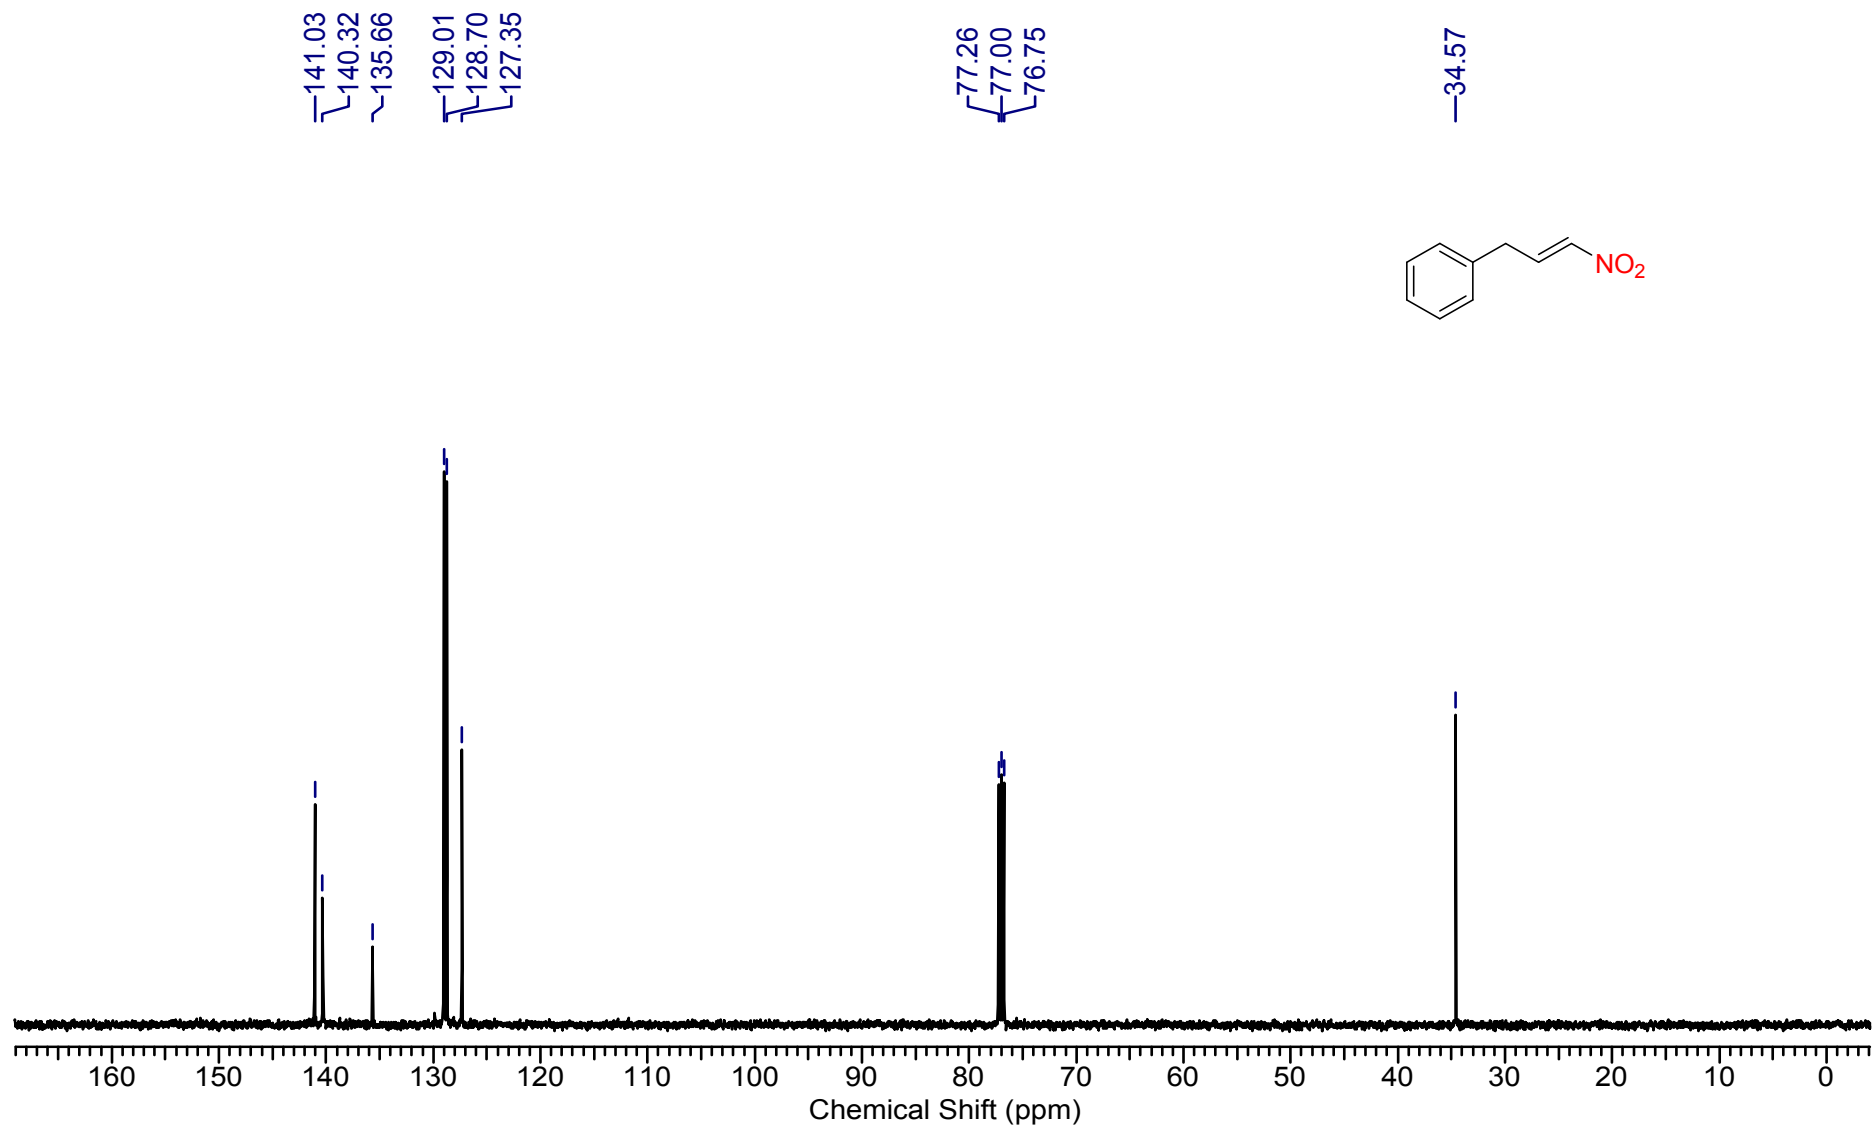

Figure S23b.  $^{13}\text{C}$  NMR of 1s

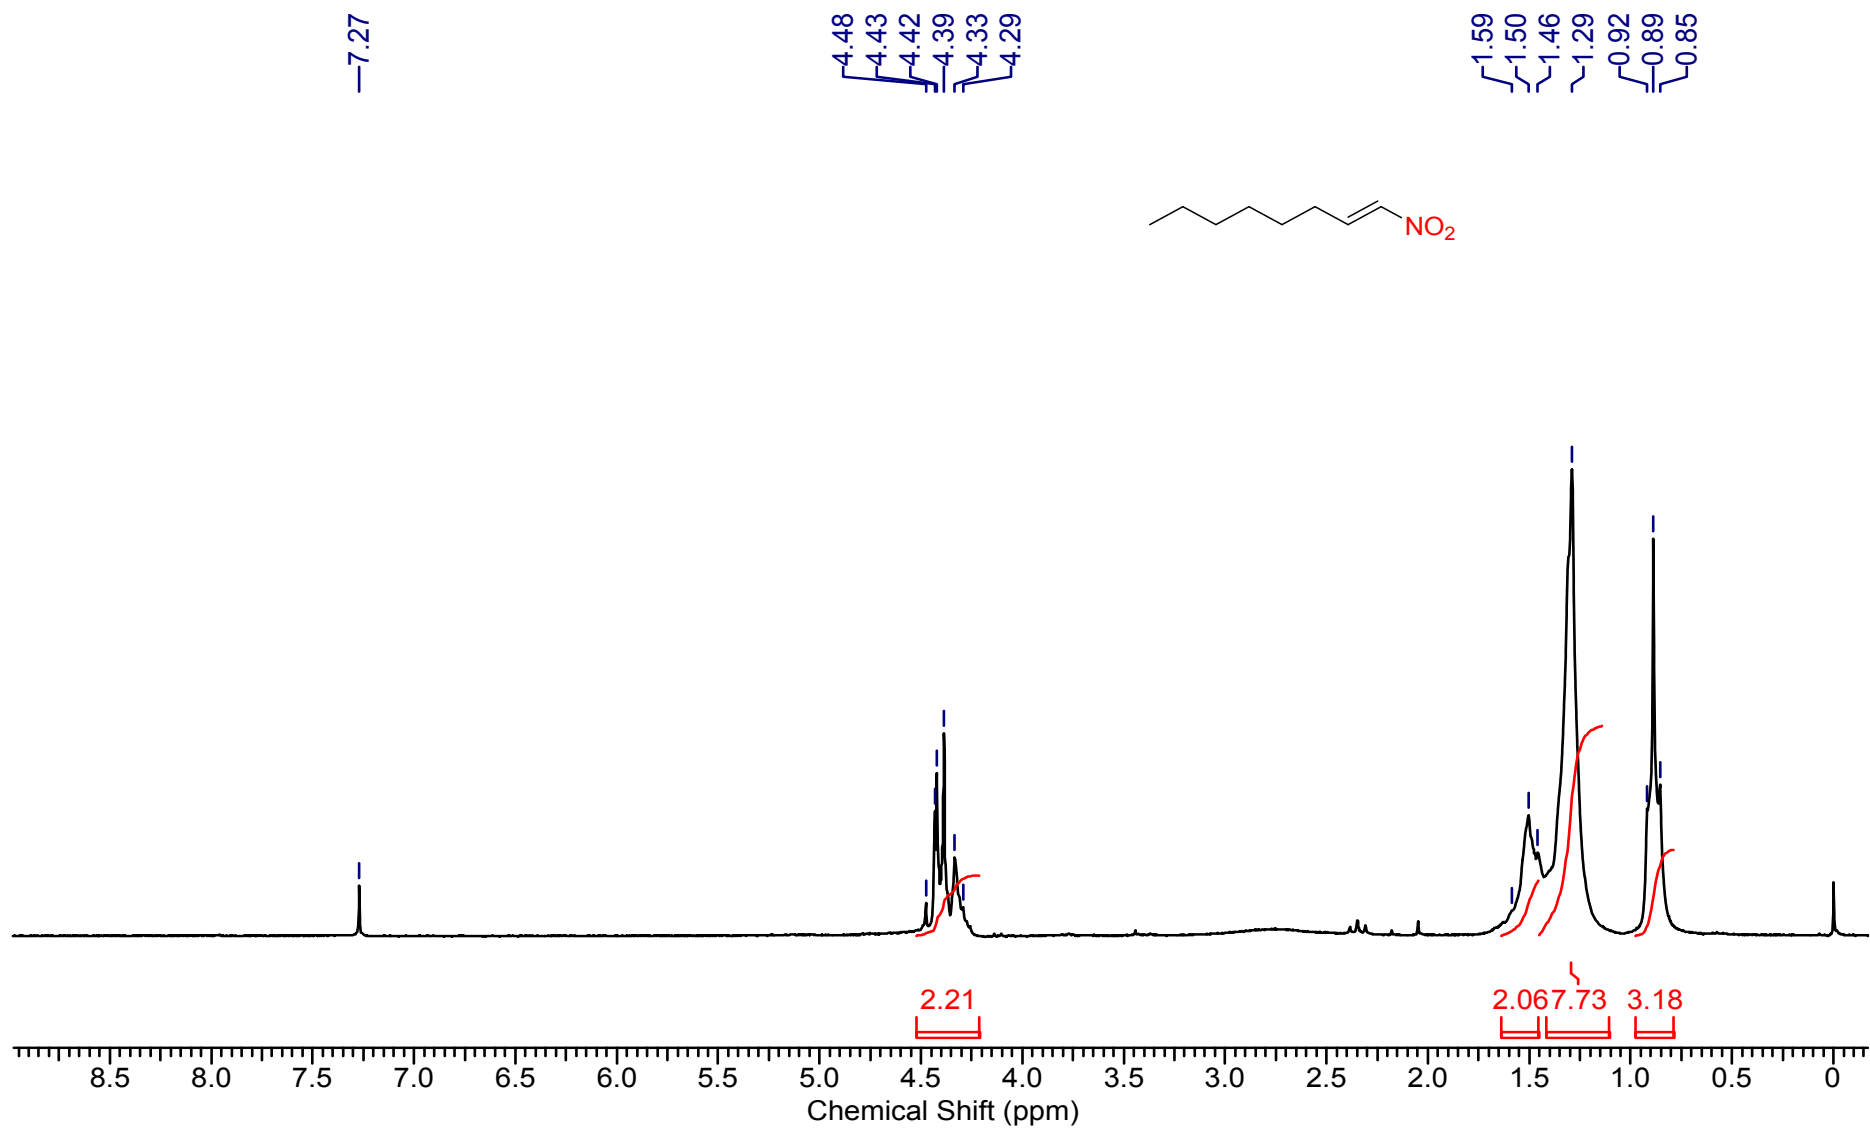

Figure S24a. <sup>1</sup>H NMR of 1t

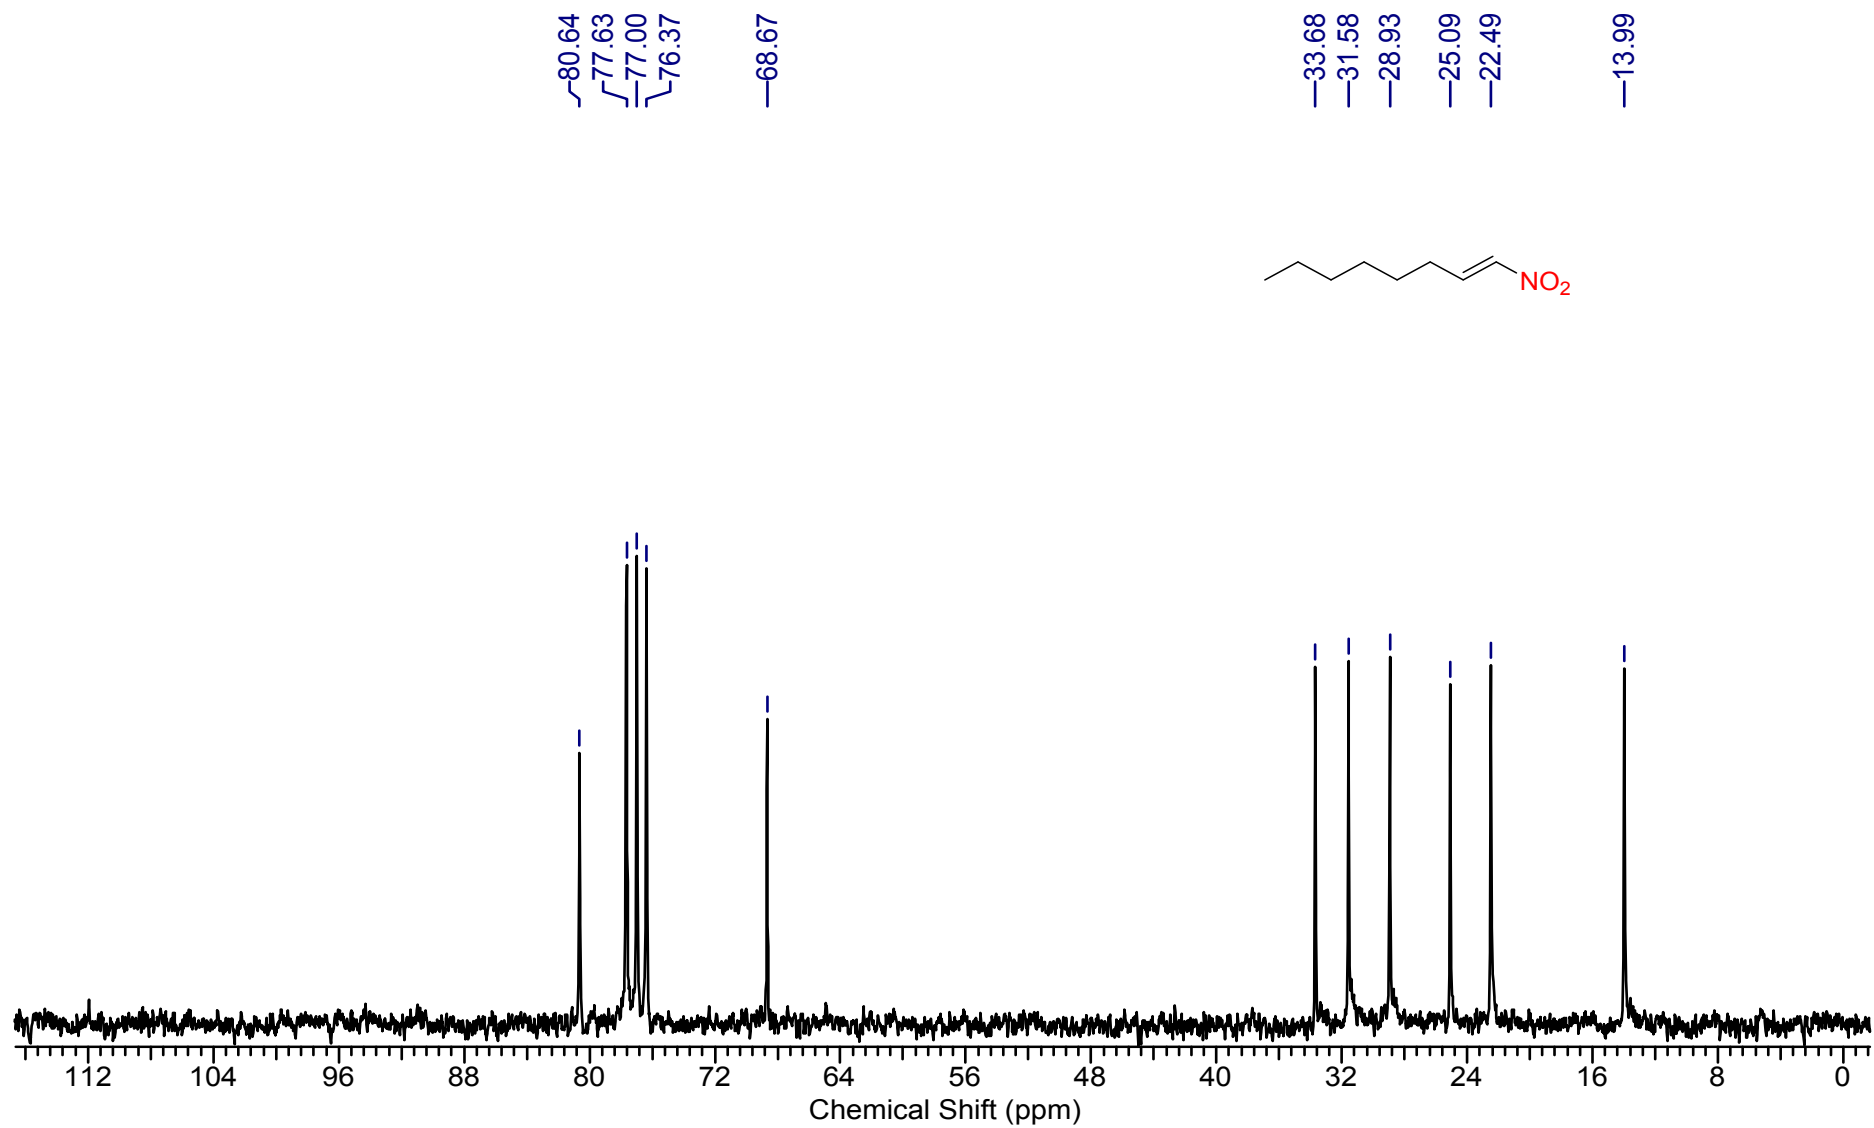

Figure S24b. <sup>13</sup>C NMR of 1t

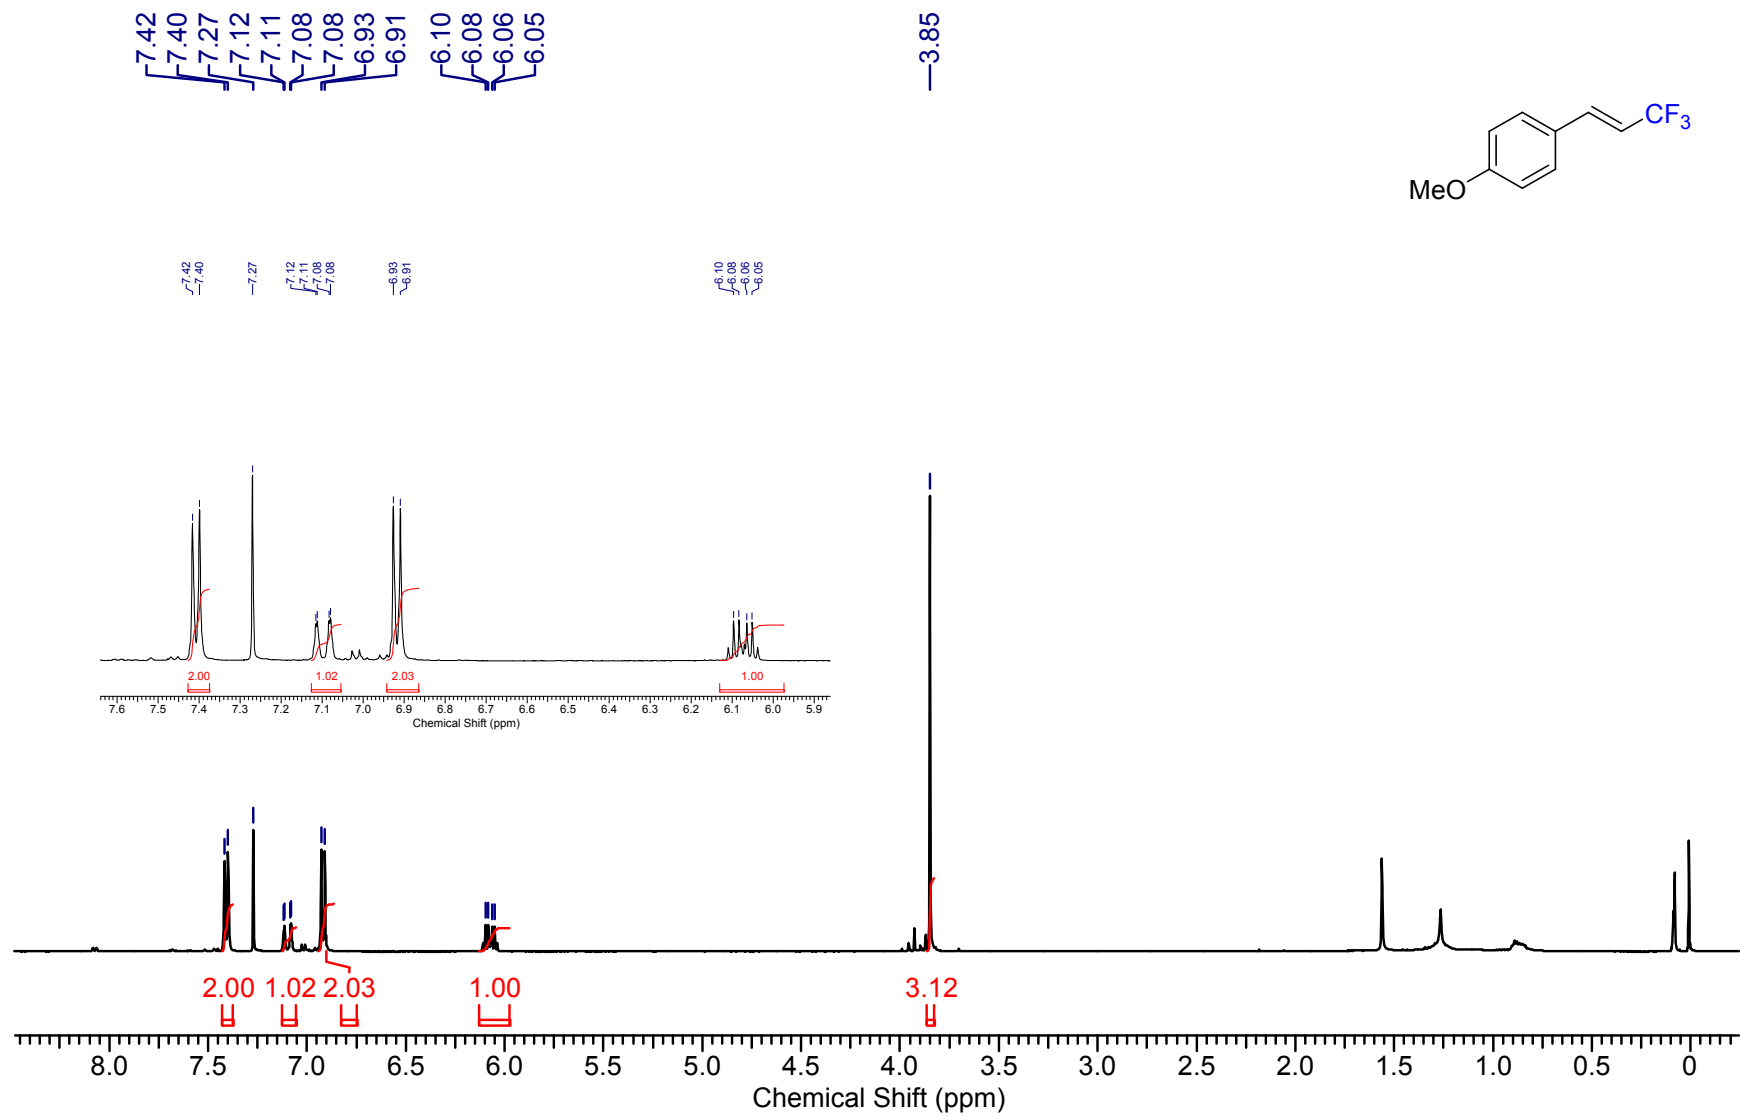

Figure S25a. <sup>1</sup>H NMR of 3a

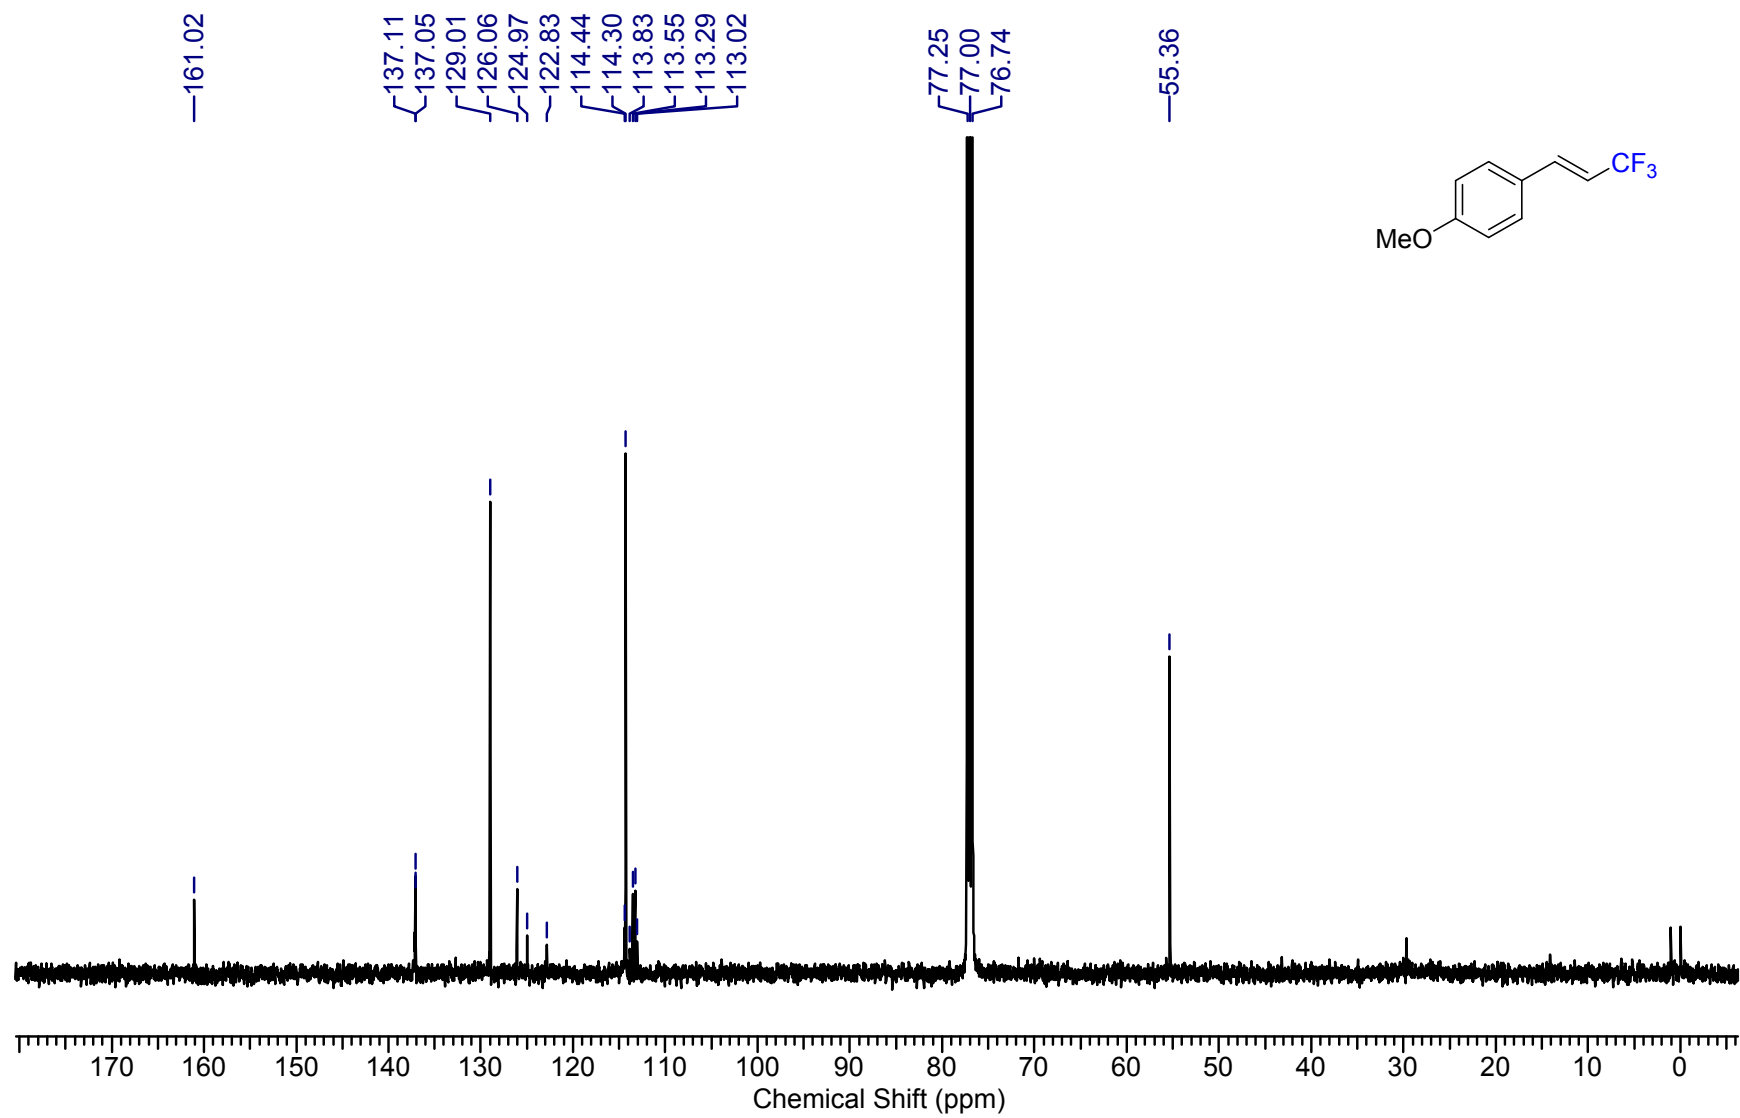

Figure S25b. <sup>13</sup>C NMR of 3a

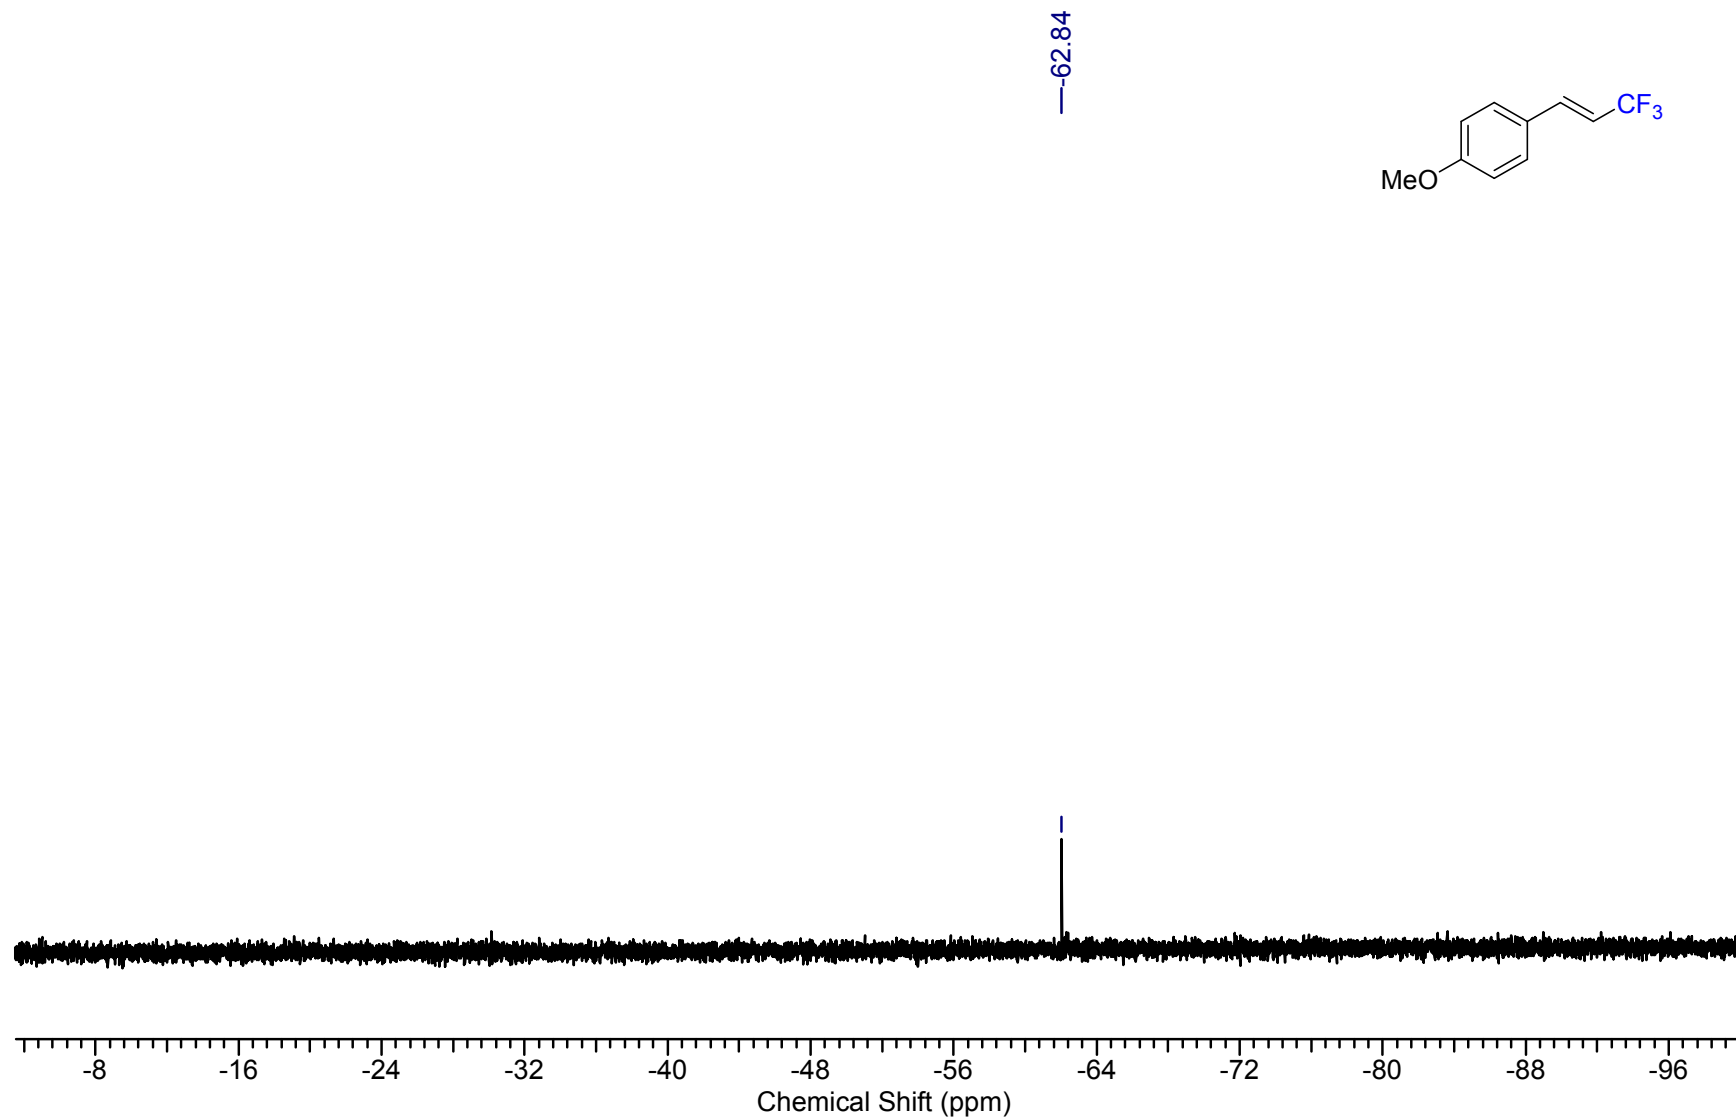

Figure S25c.  $^{19}\text{F}$  NMR of 3a

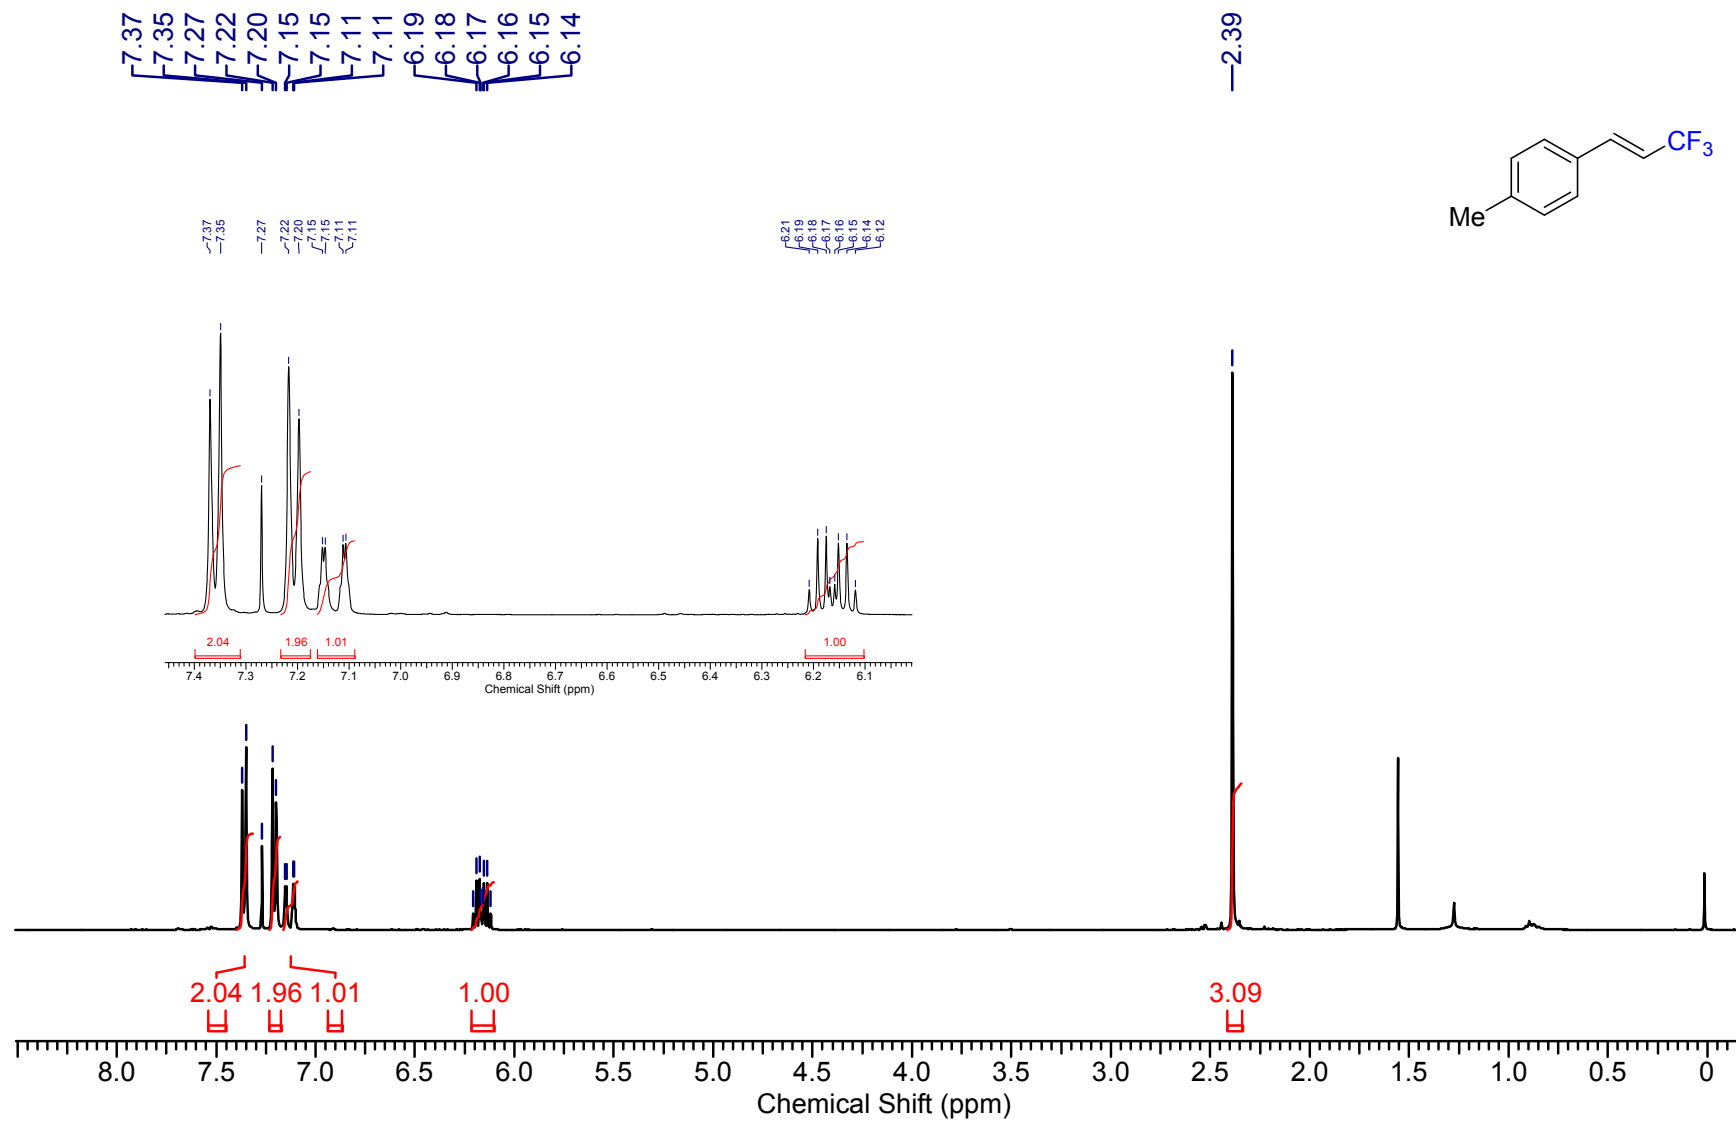

Figure S26a. <sup>1</sup>H NMR of 3b

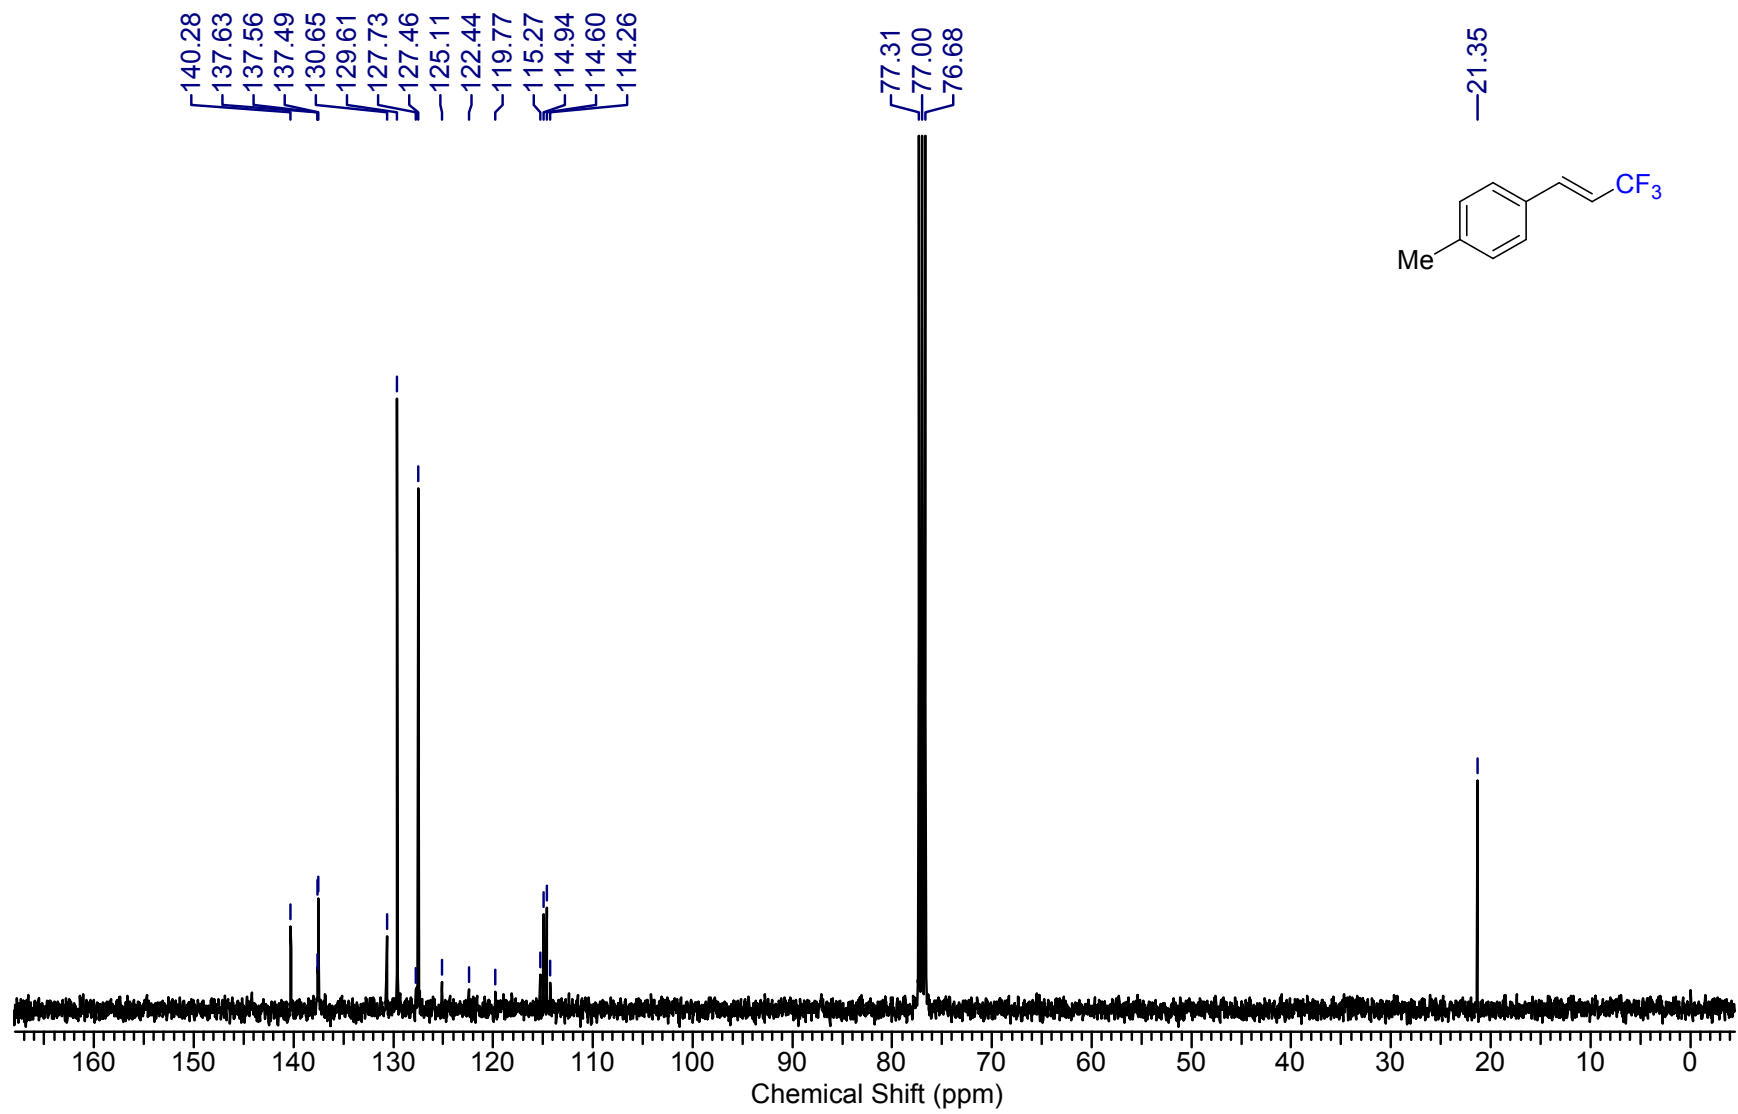

Figure S26b.  $^{13}\text{C}$  NMR of **3b**



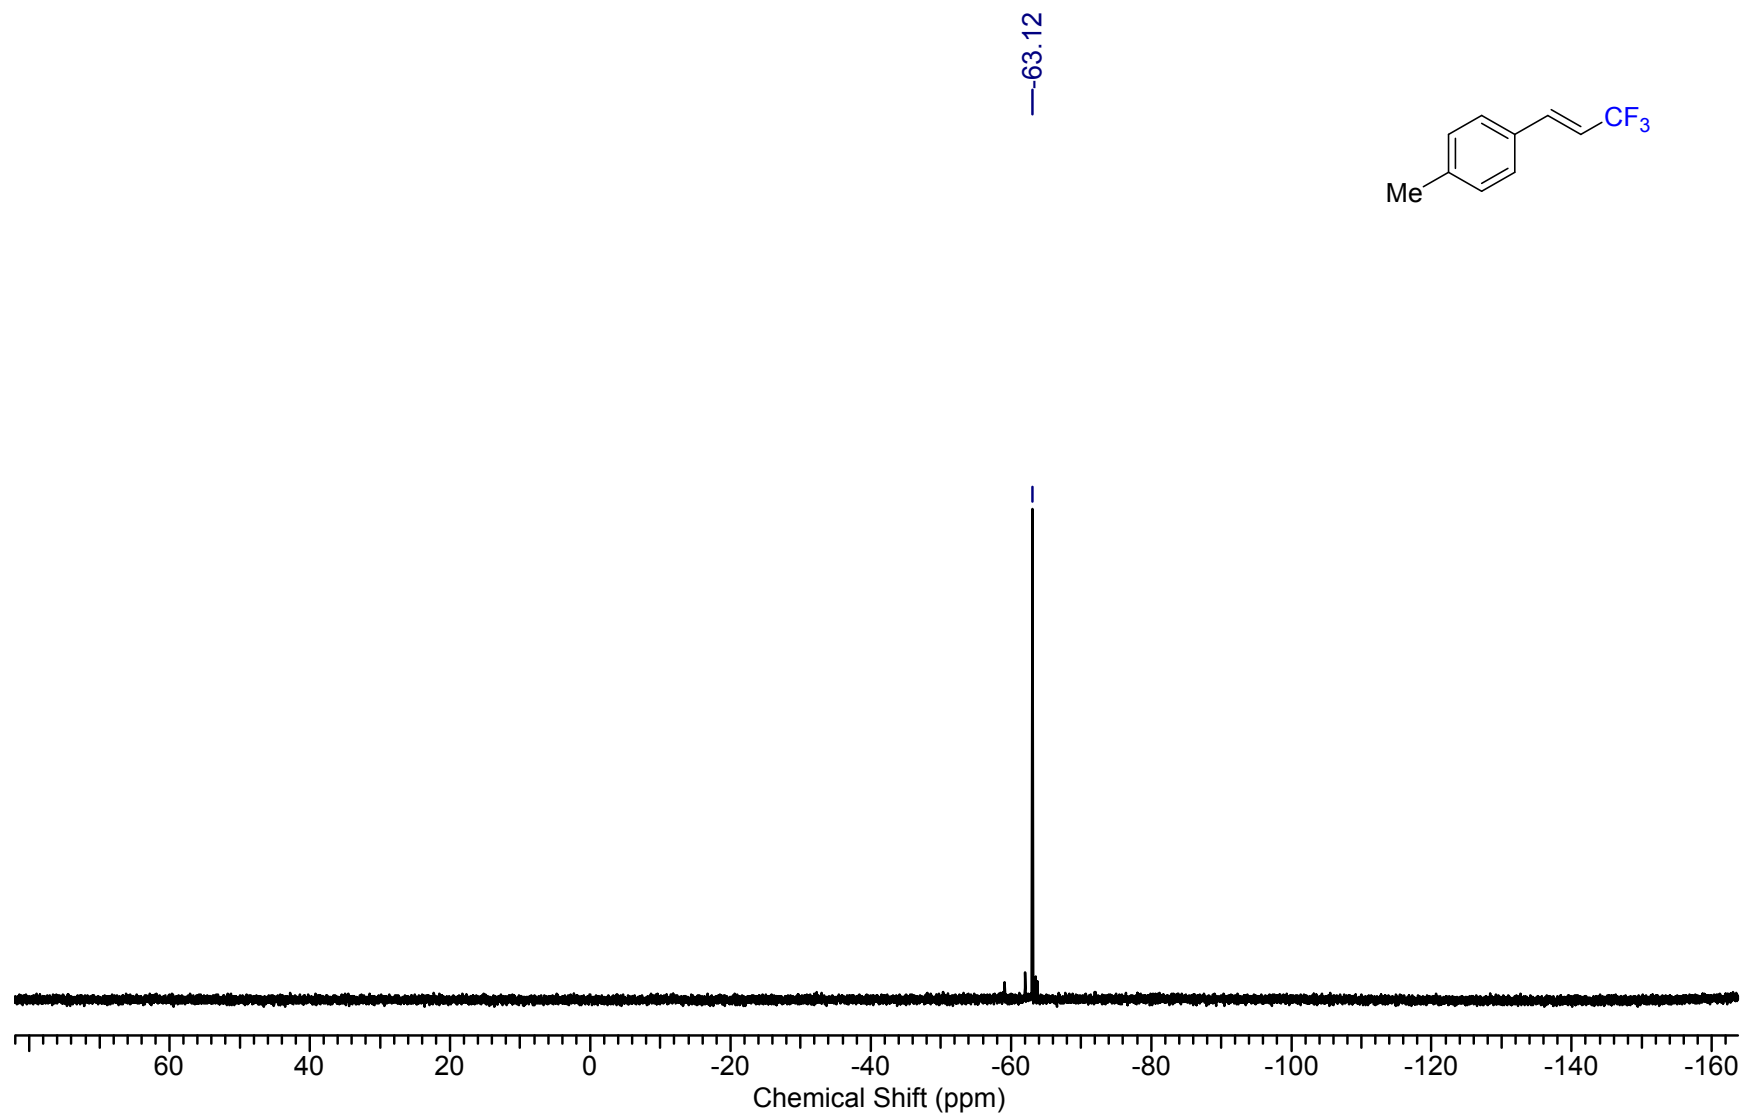

Figure S26c.  $^{19}\text{F}$  NMR of 3b

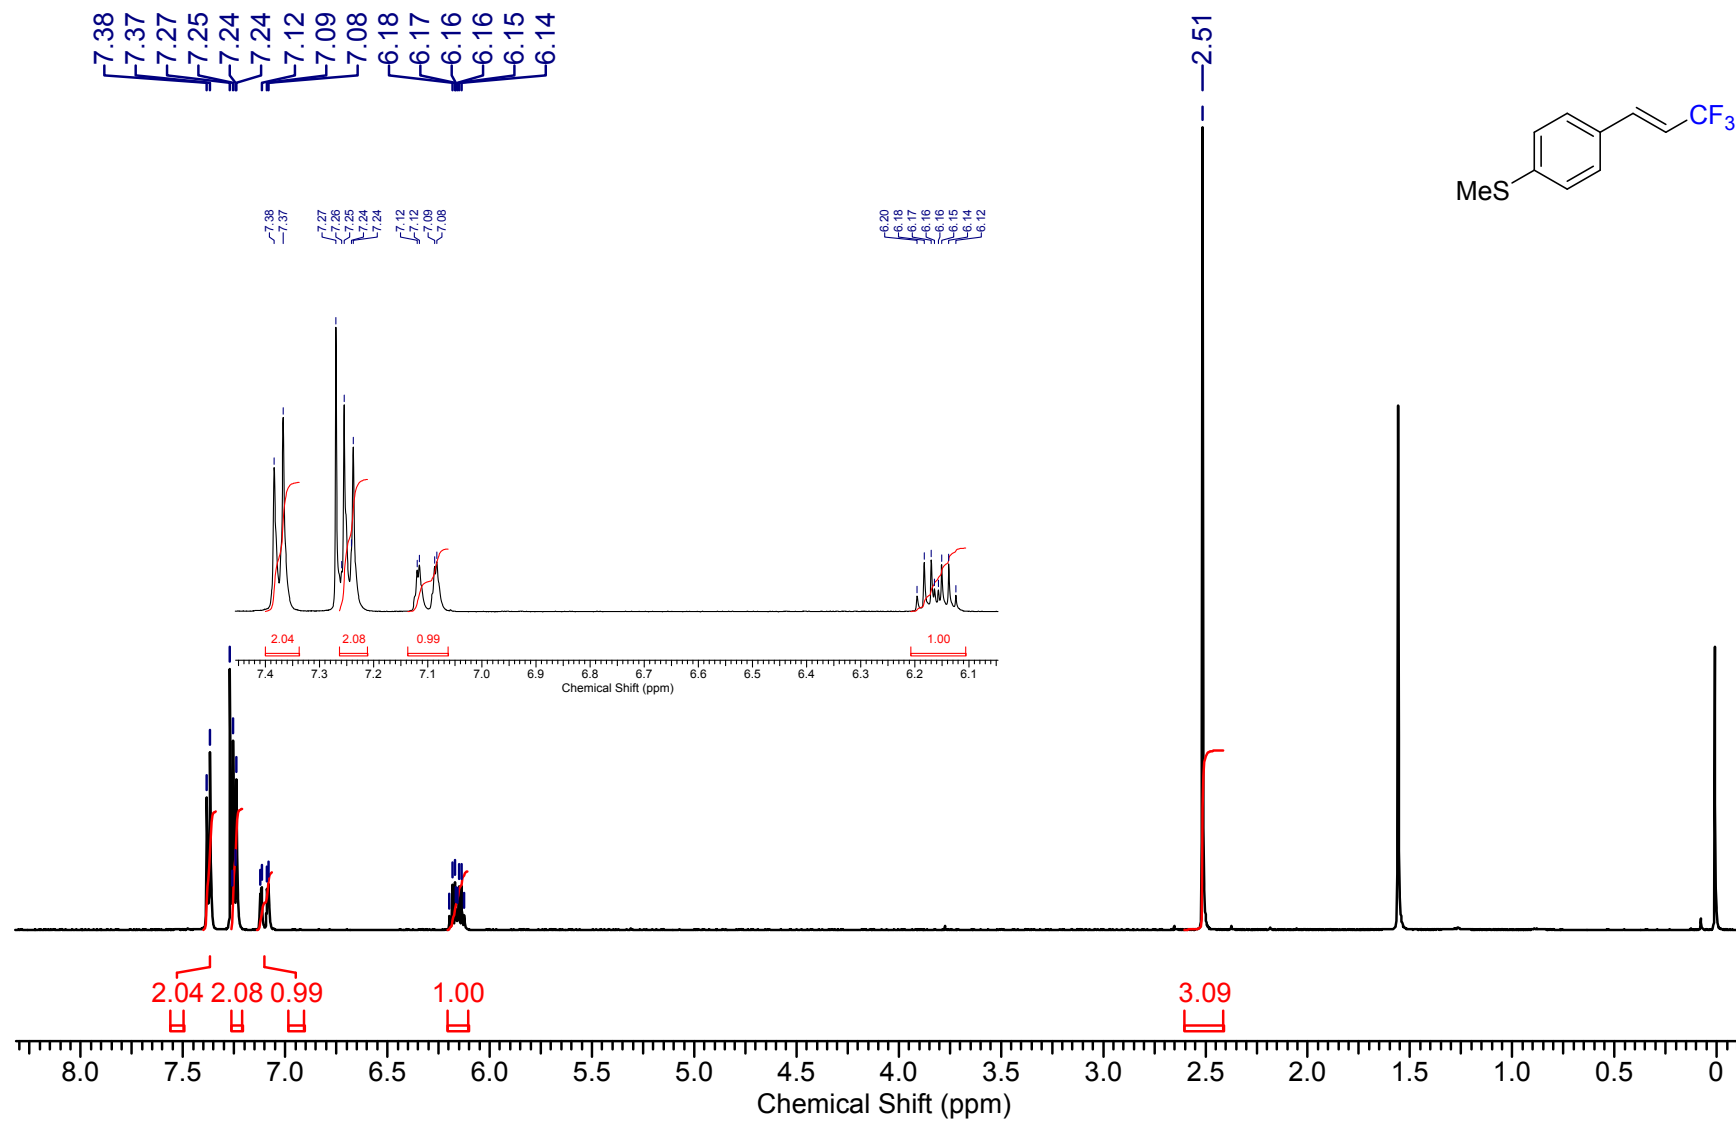

Figure S27a.  $^1\text{H}$  NMR of **3c**

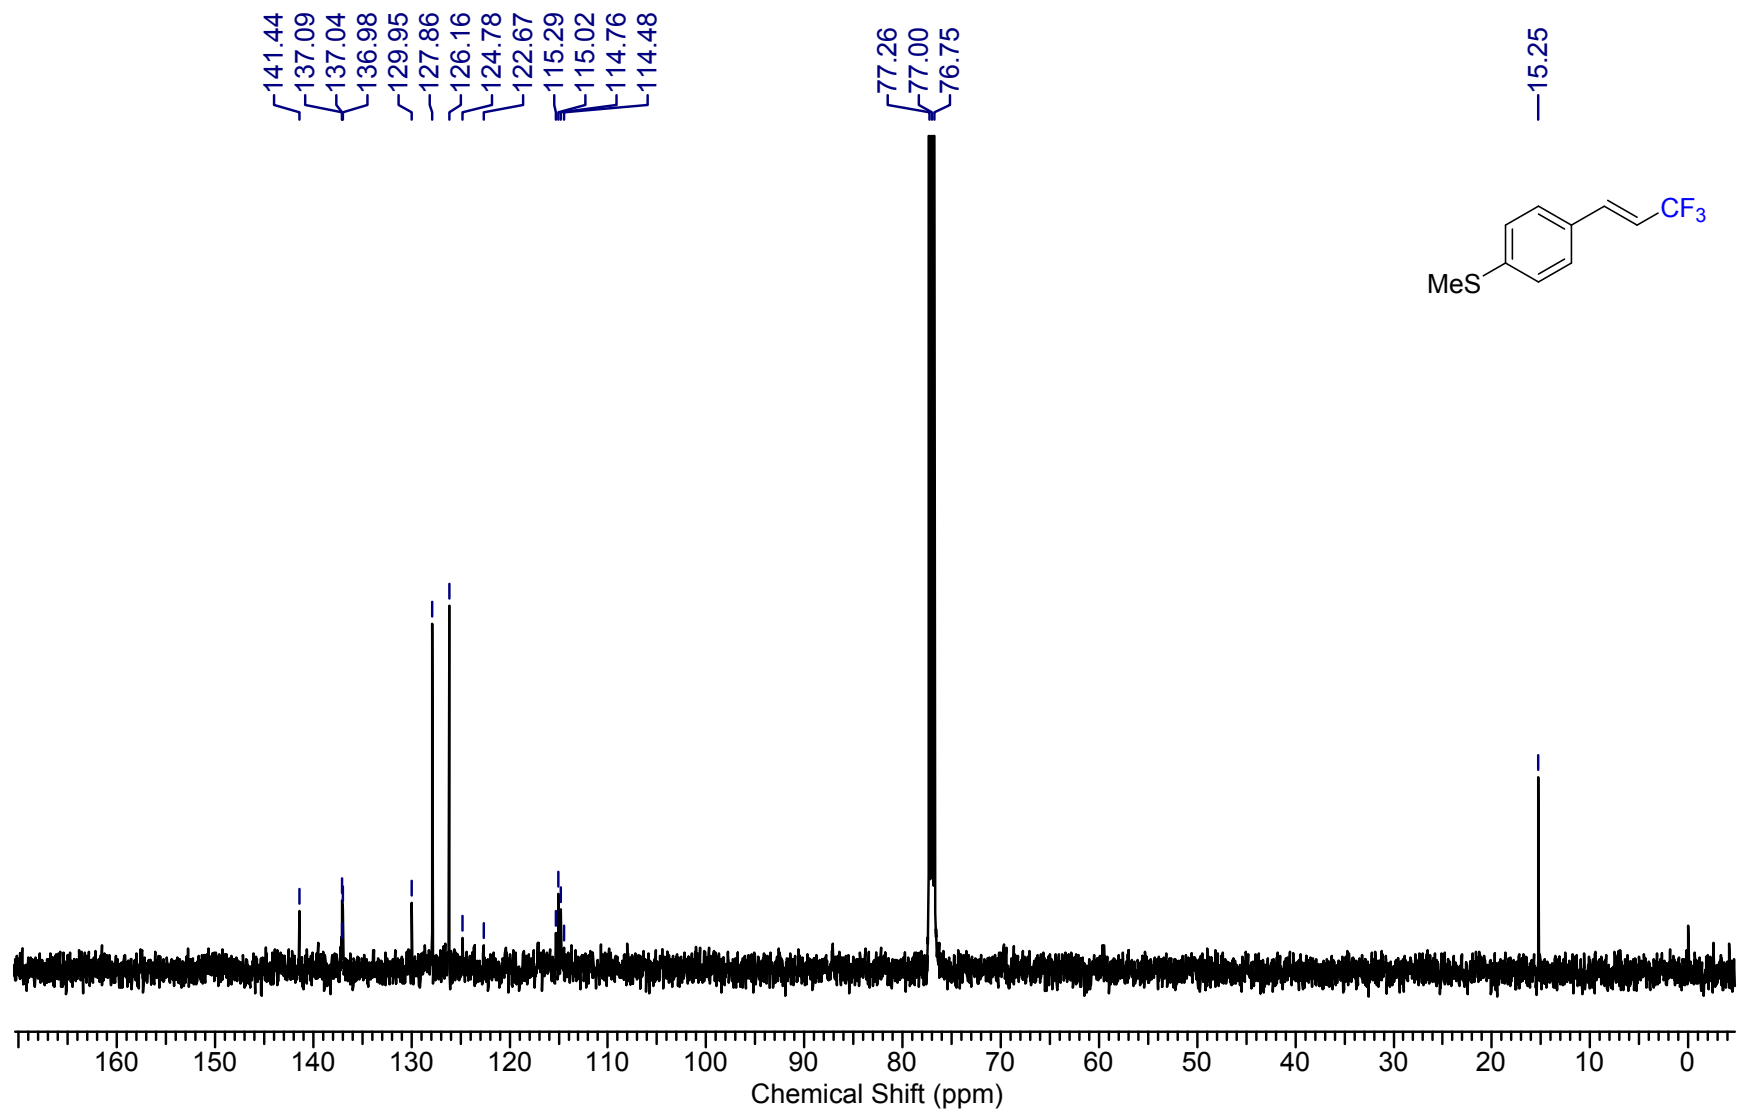

Figure S27b.  $^{13}\text{C}$  NMR of 3c

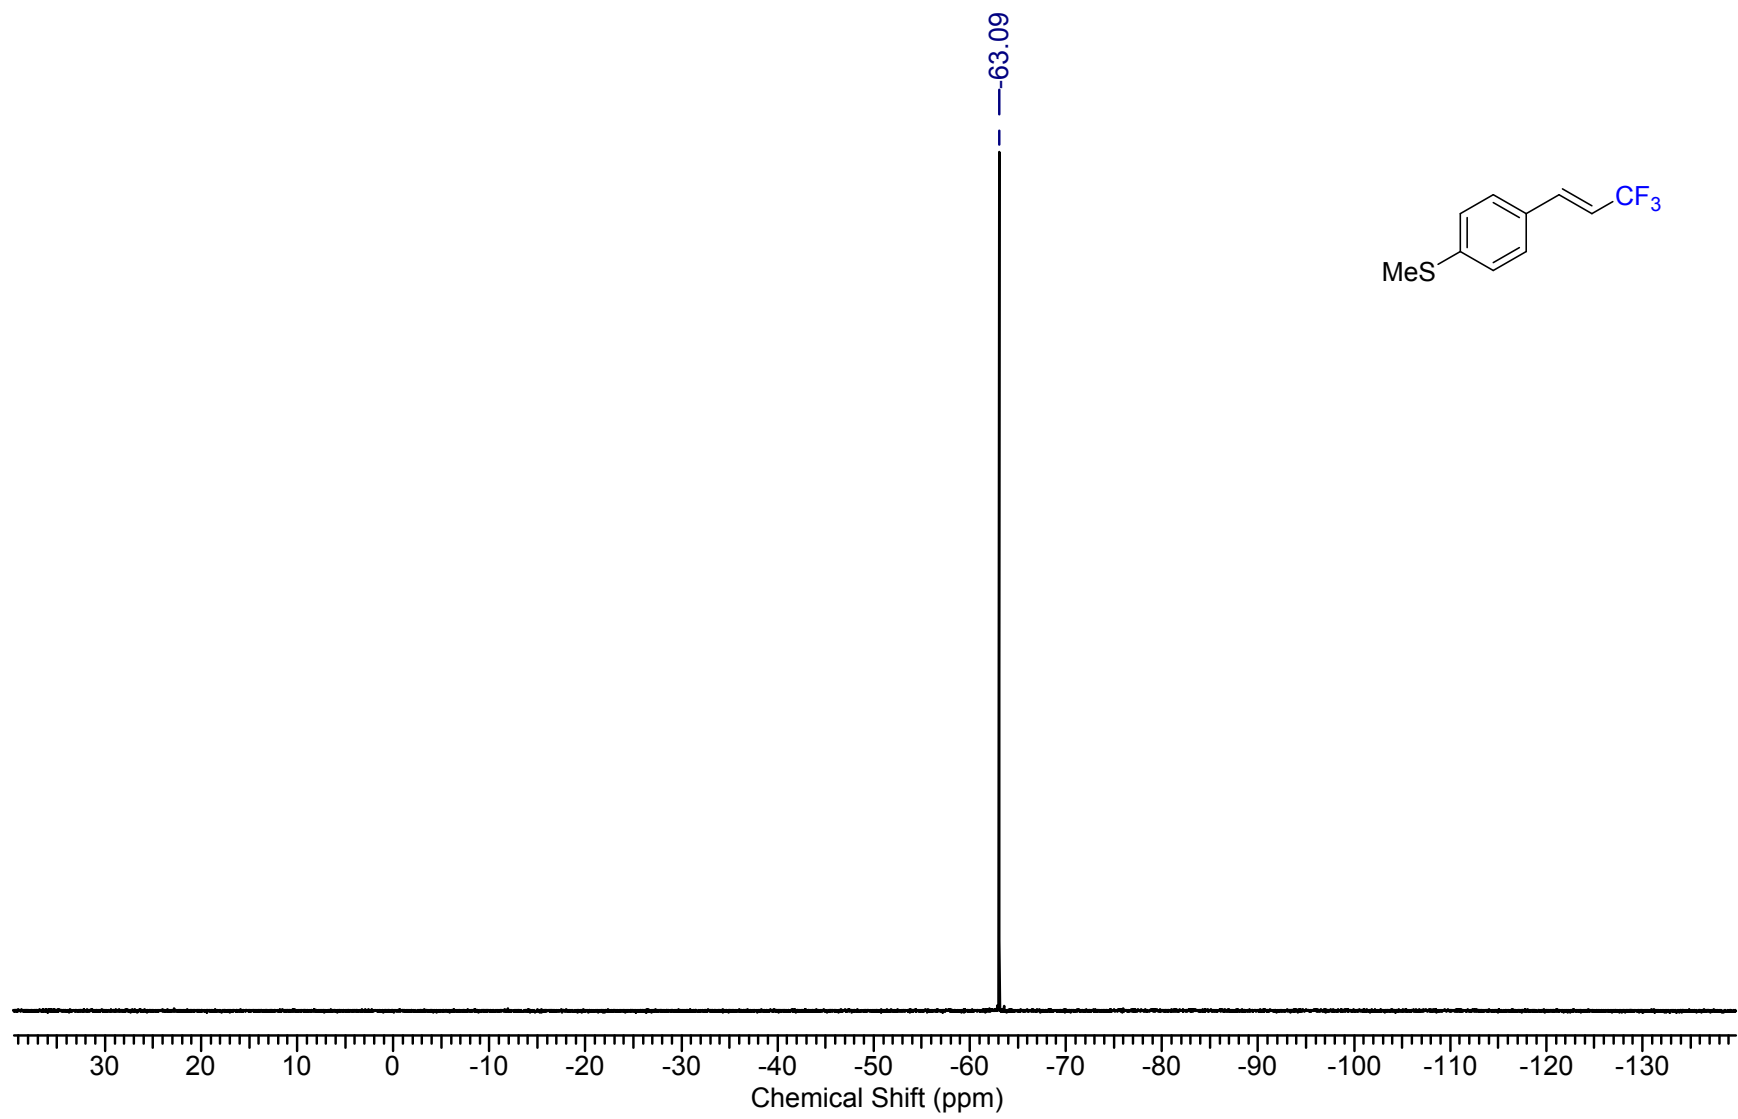

**Figure S27c.**  $^{19}\text{F}$  NMR of **3c**

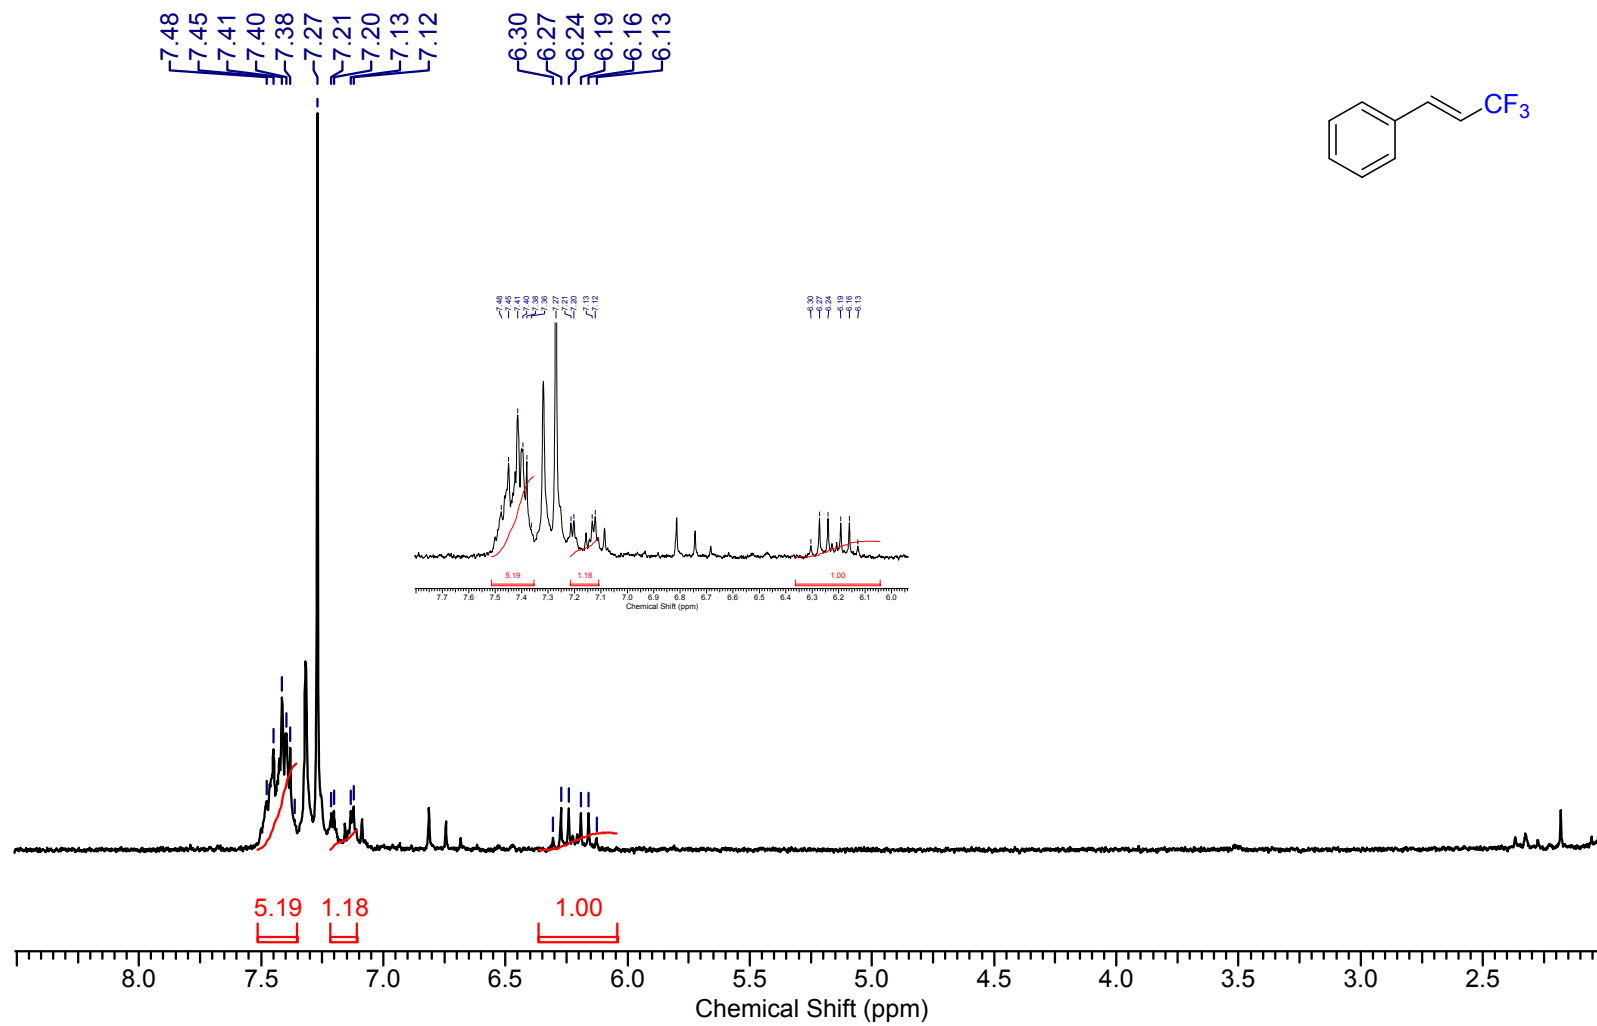

**Figure S28a.** <sup>1</sup>H NMR of 3d

(In the chemical shift range of 1.5 to 0.8 ppm, impurity peaks from pet ether were observed)

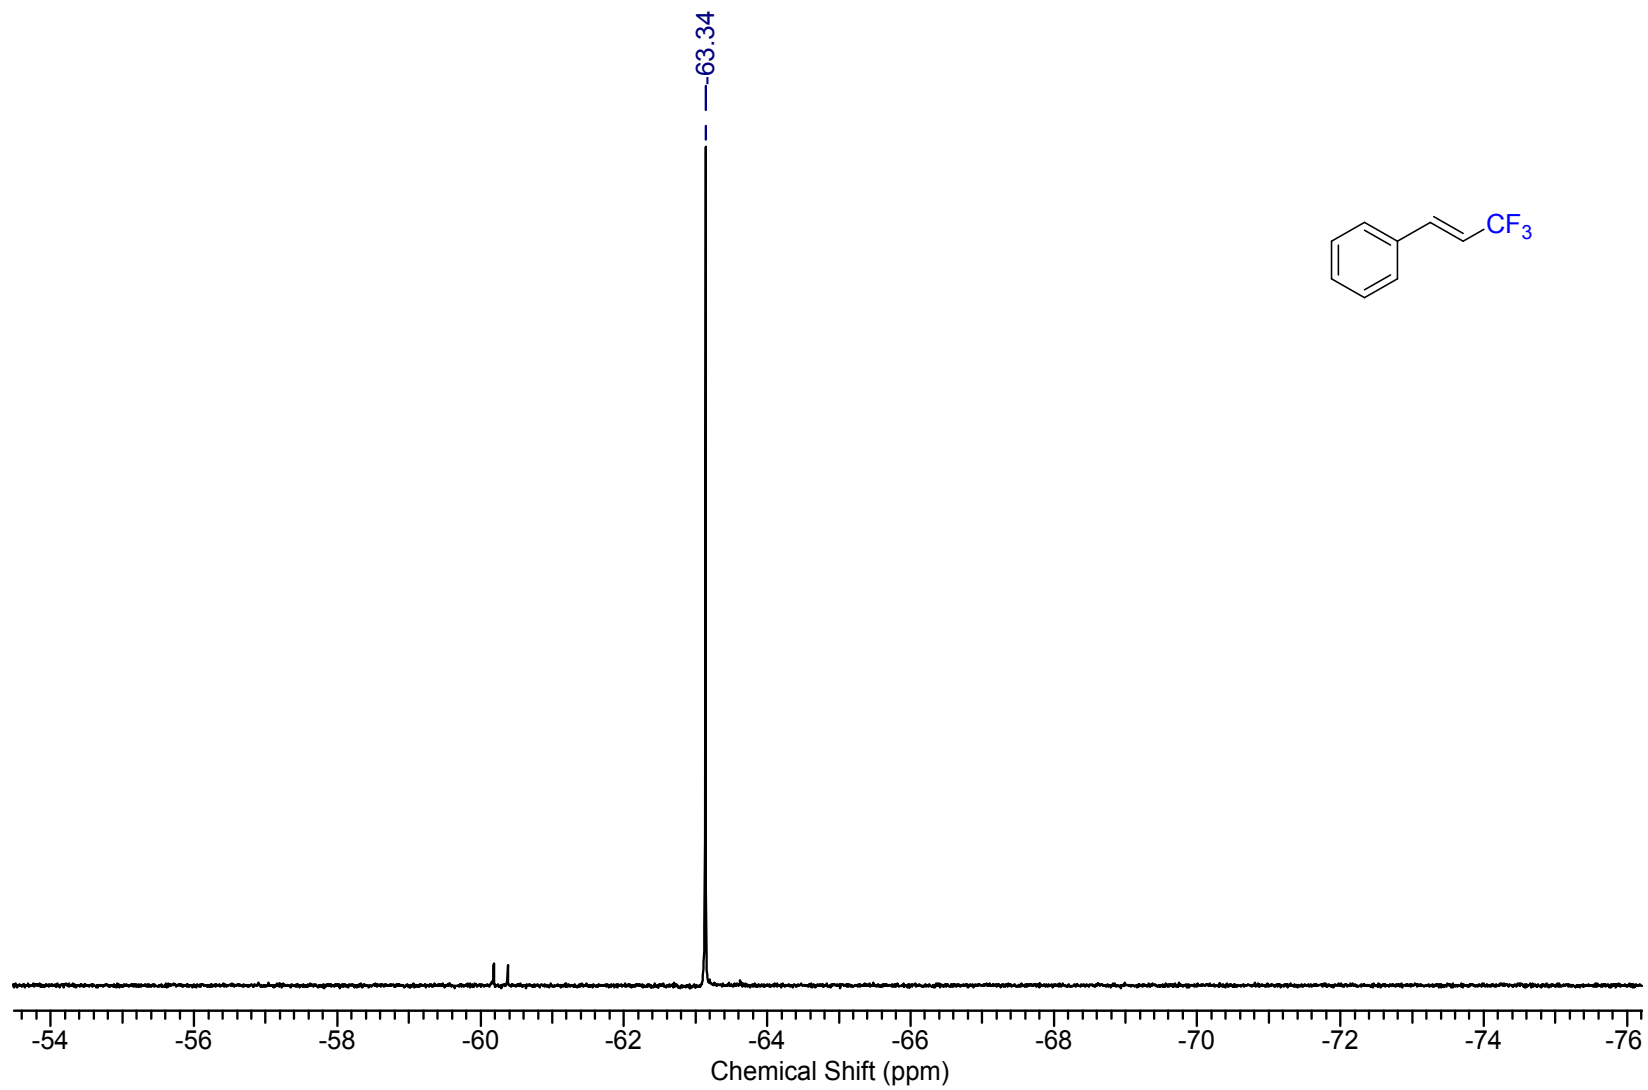

Figure S28b.  $^{19}\text{F}$  NMR of 3d

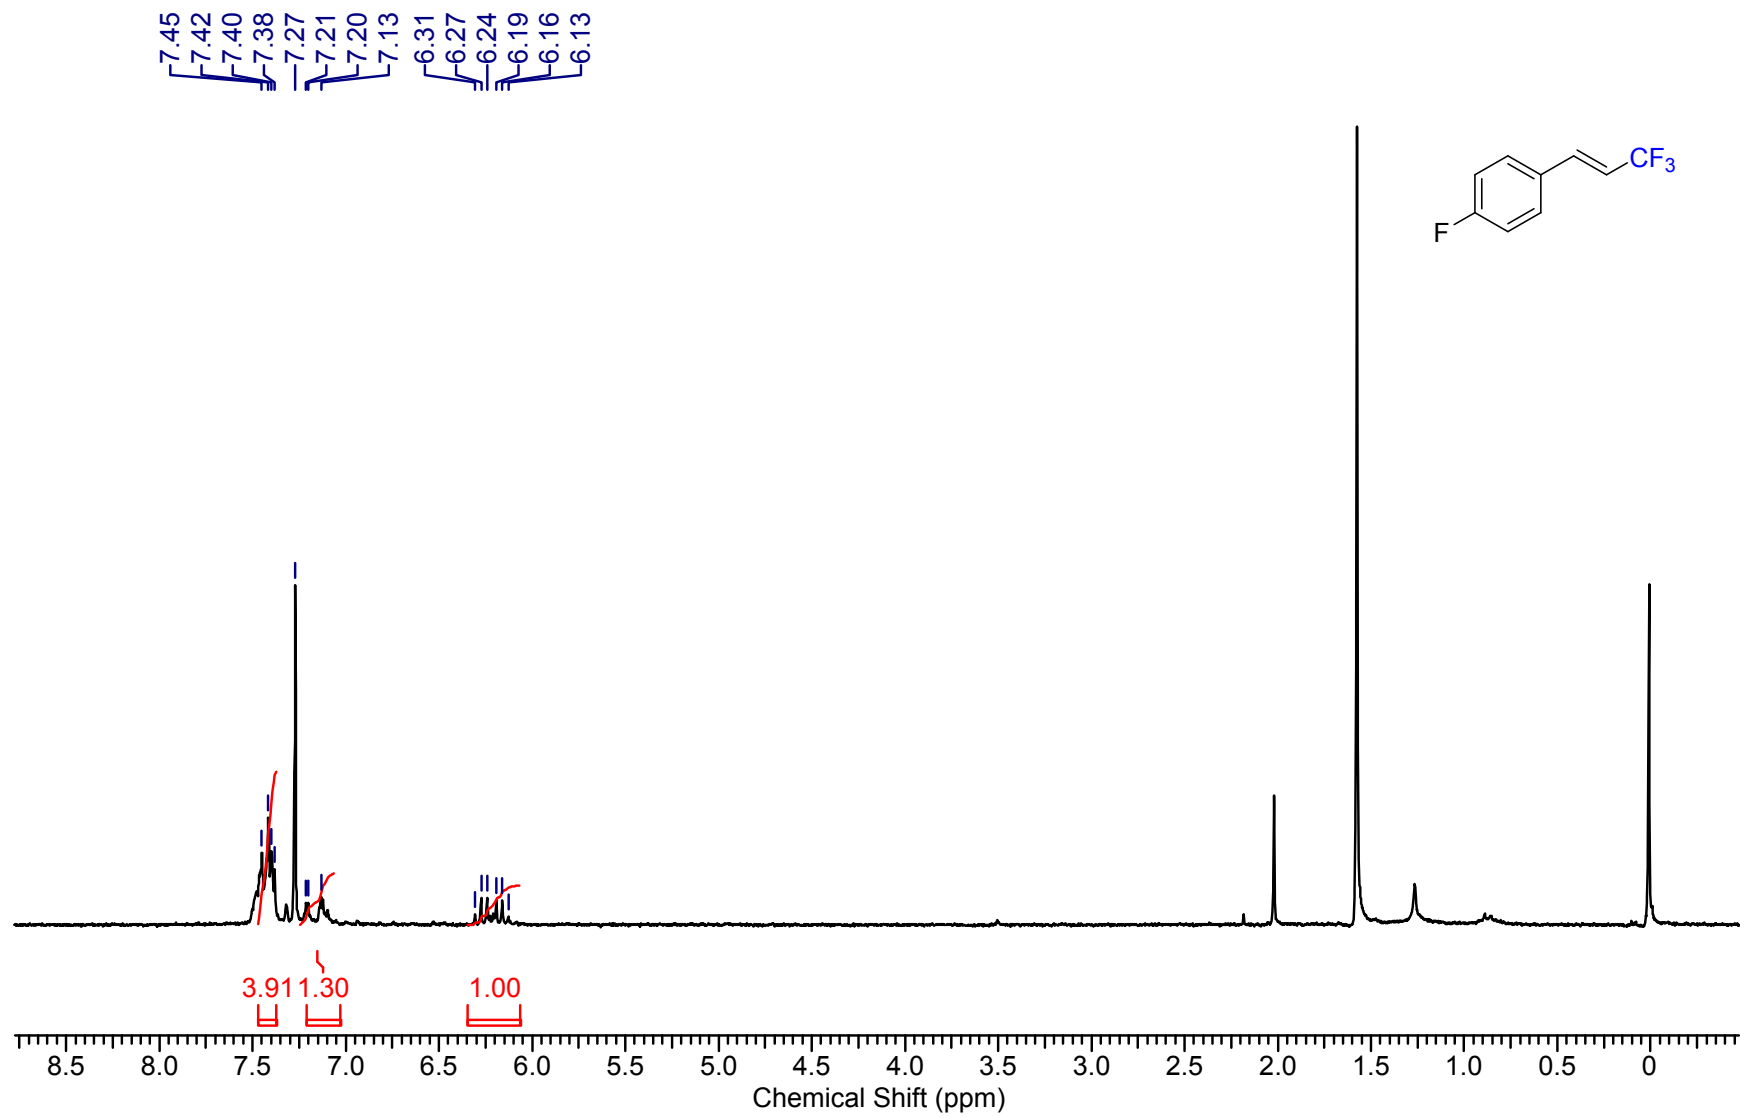

Figure S29a.  $^1\text{H}$  NMR of **3e**

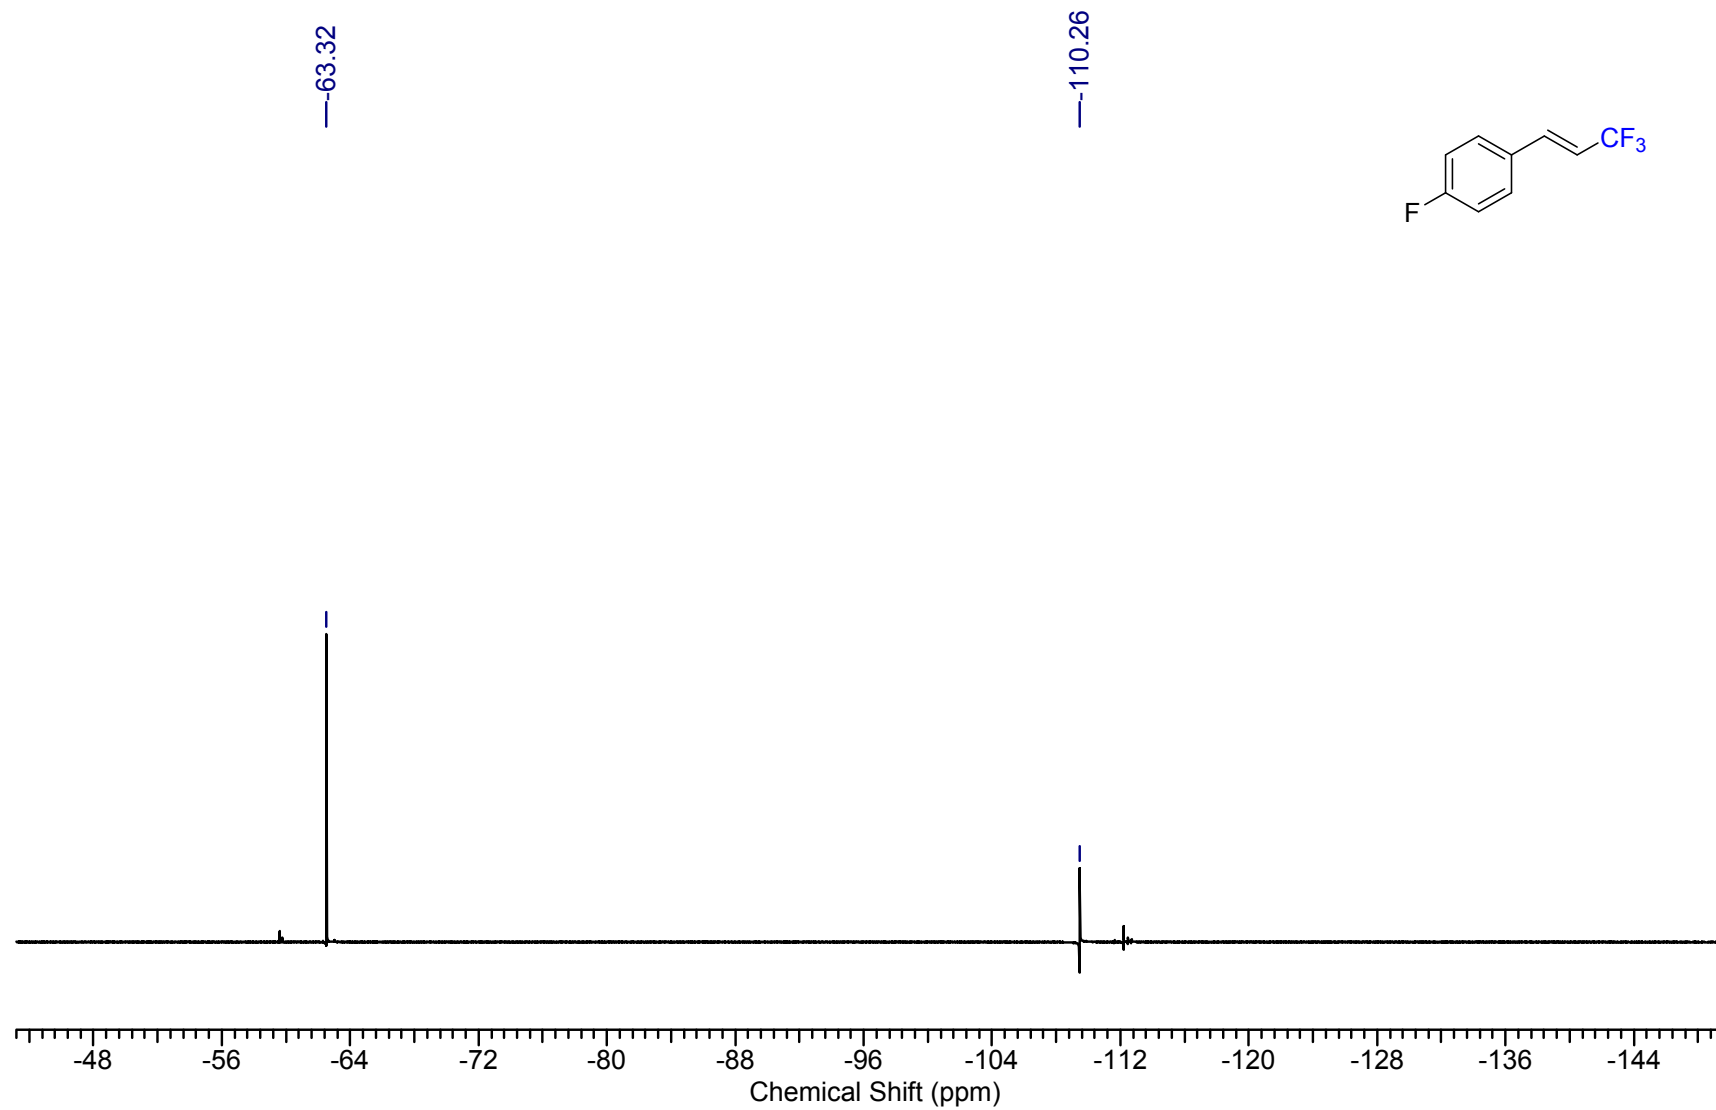

**Figure S29b.**  $^{19}\text{F}$  NMR of **3e**



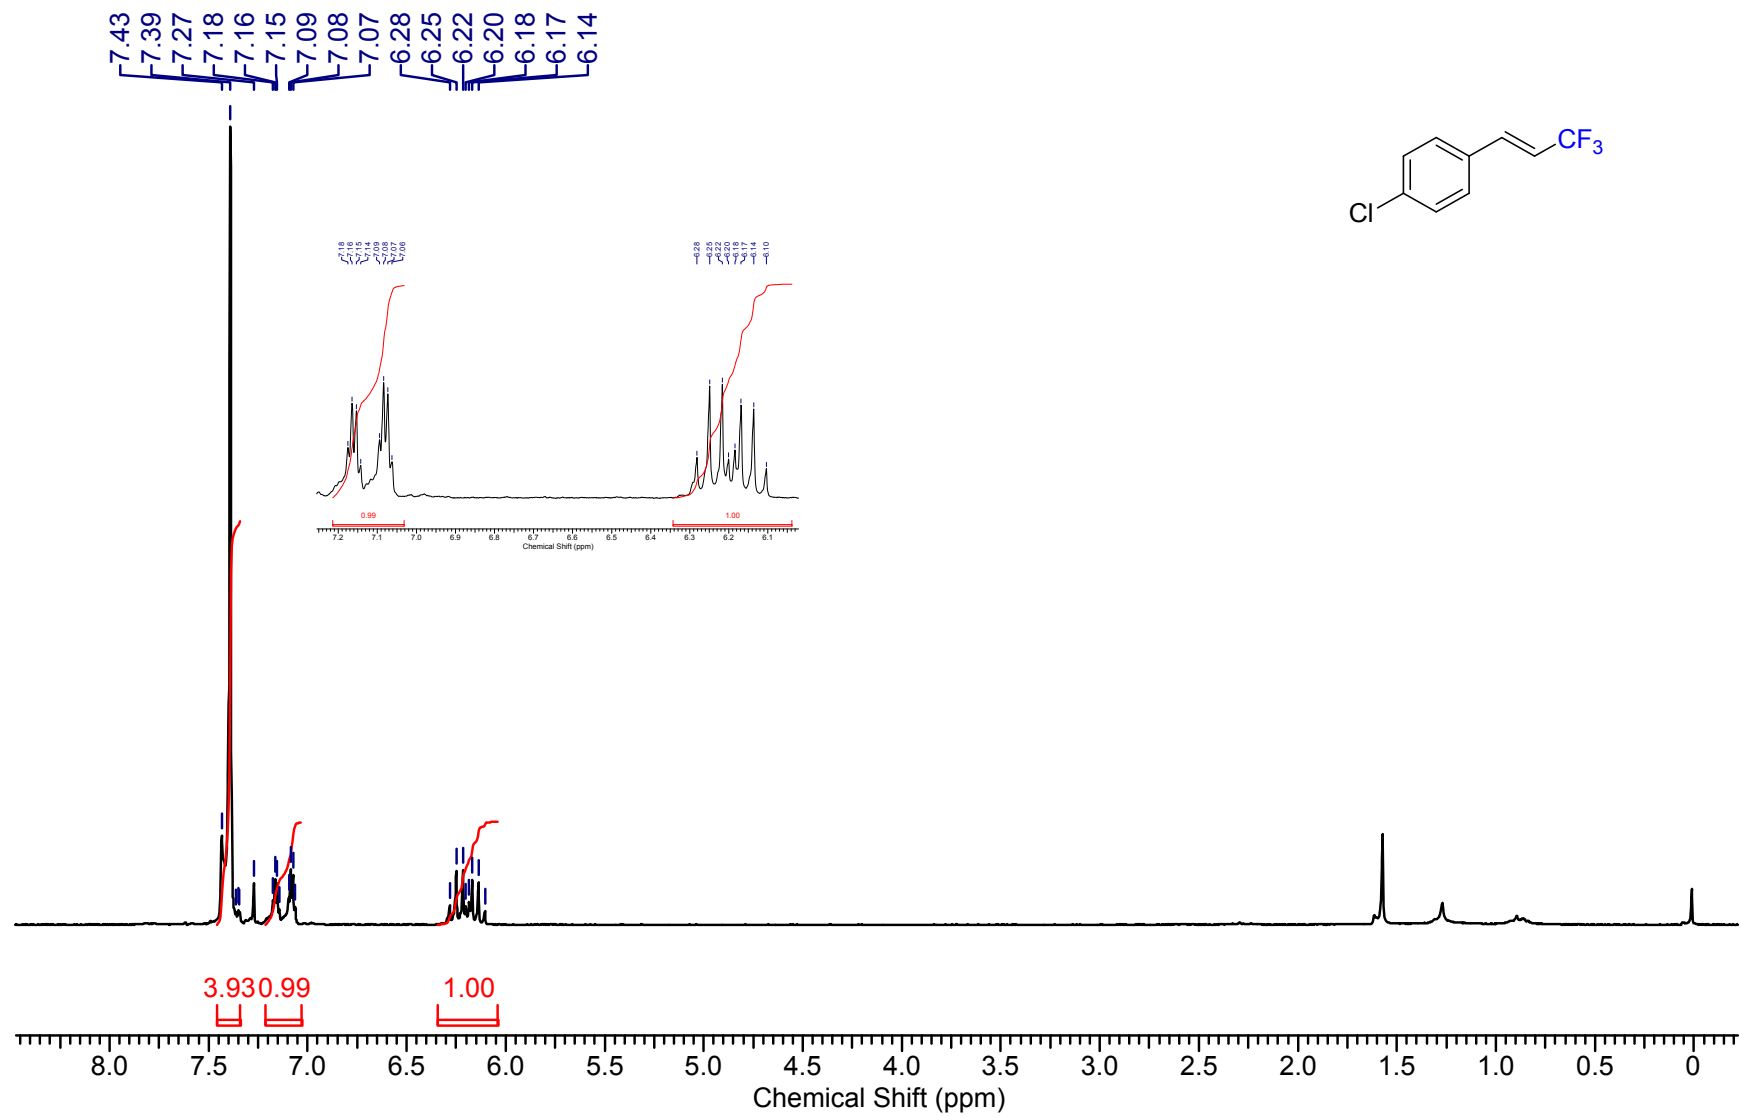

Figure S30a. <sup>1</sup>H NMR of 3f

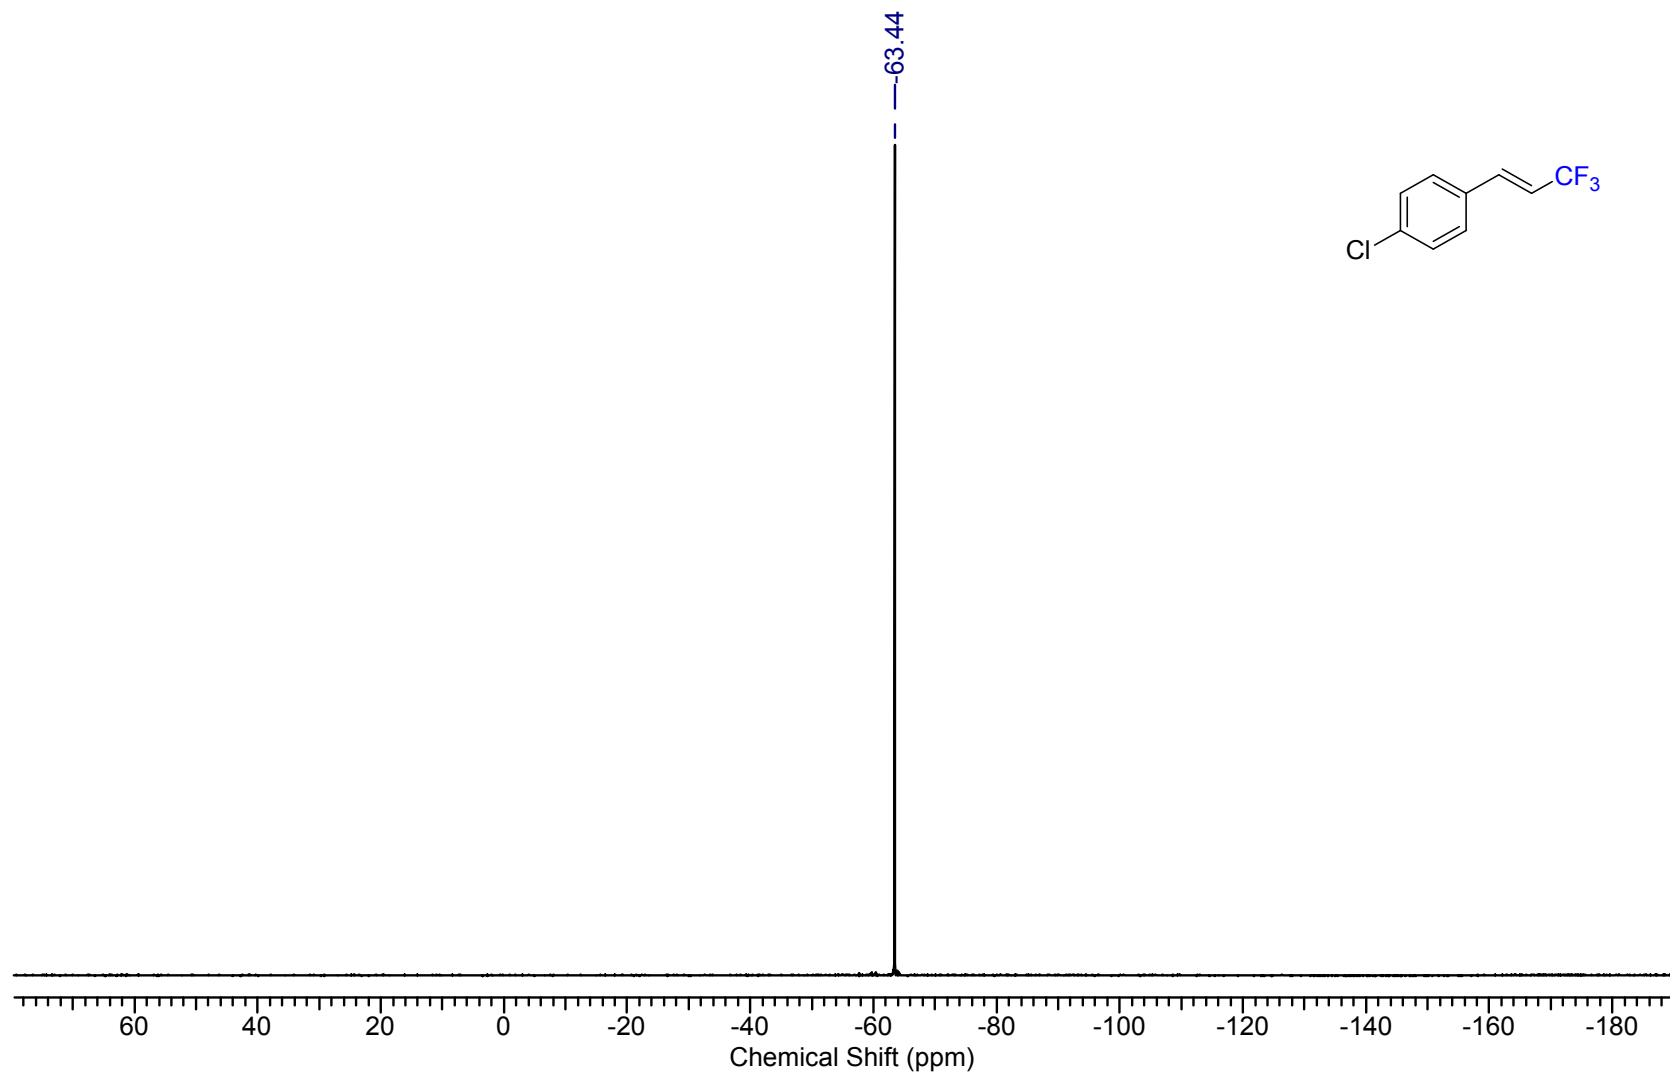

**Figure S30b.**  $^{19}\text{F}$  NMR of 3f

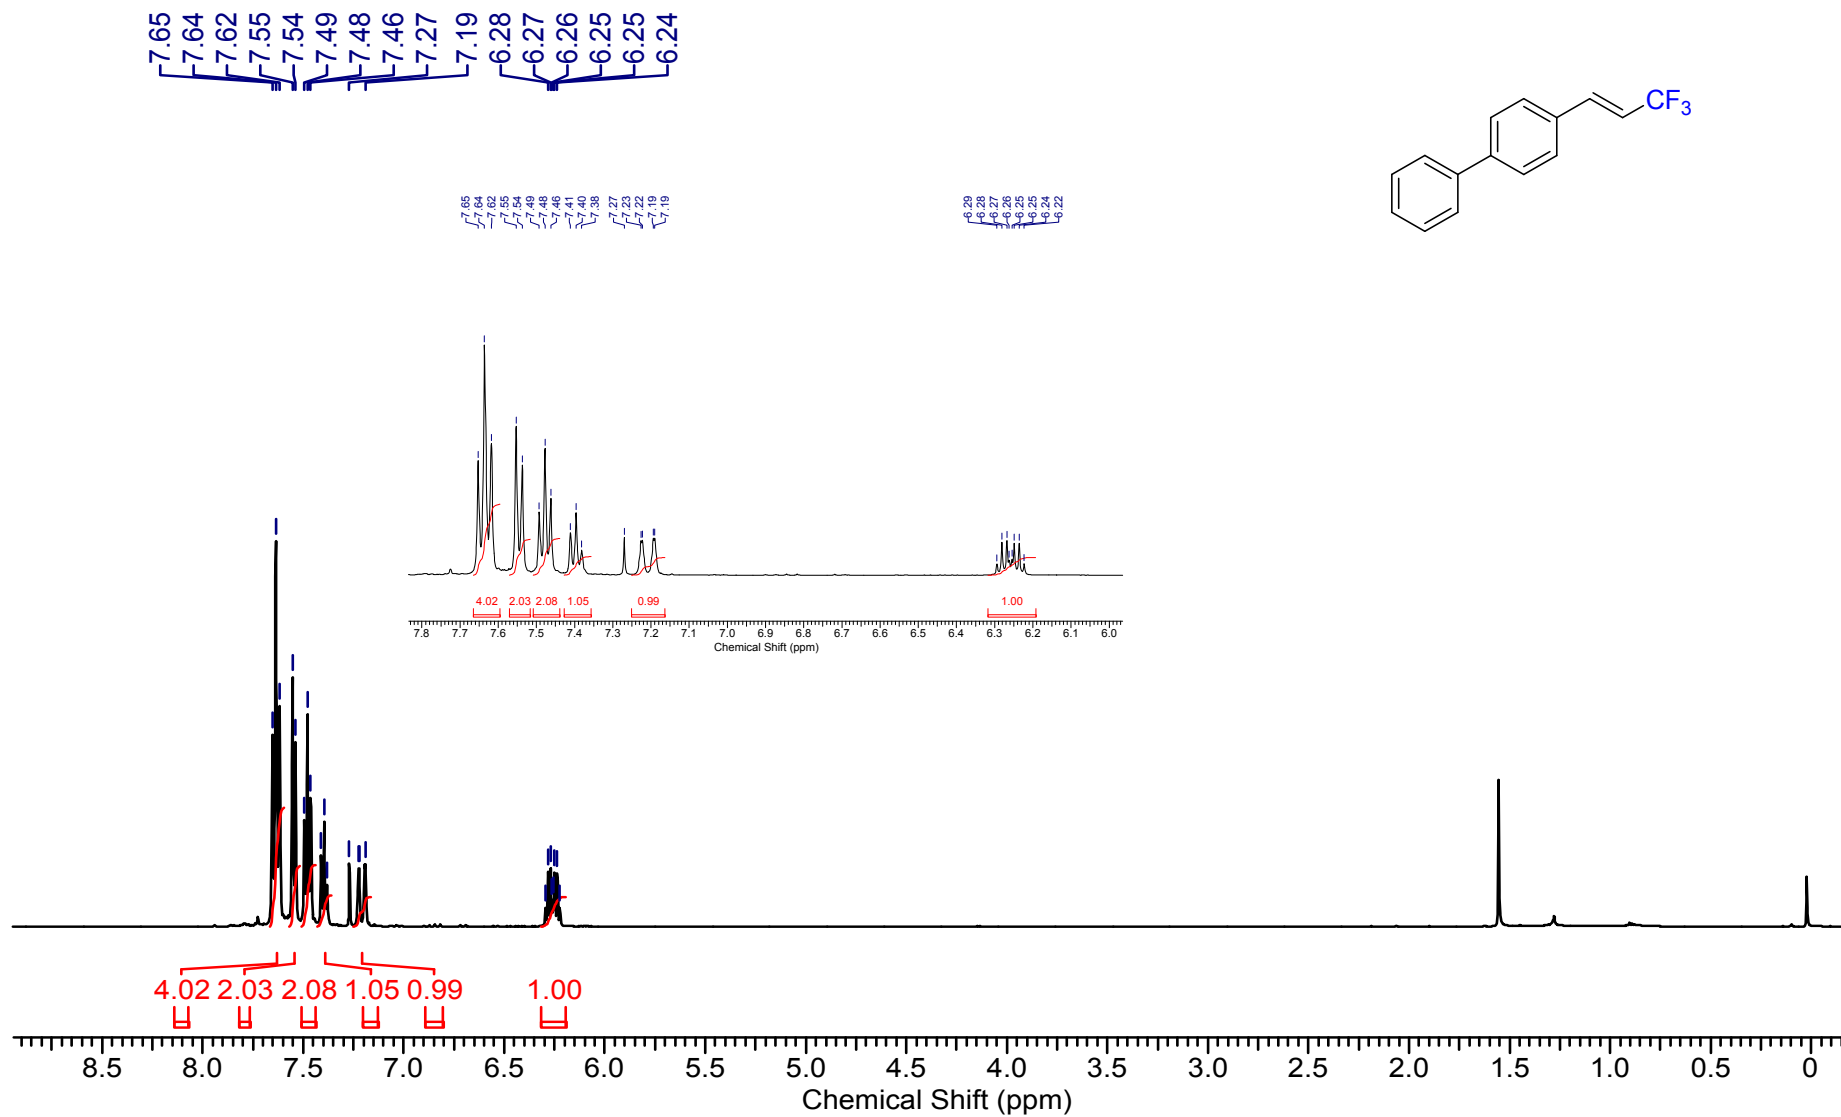

Figure S31a. <sup>1</sup>H NMR of 3g

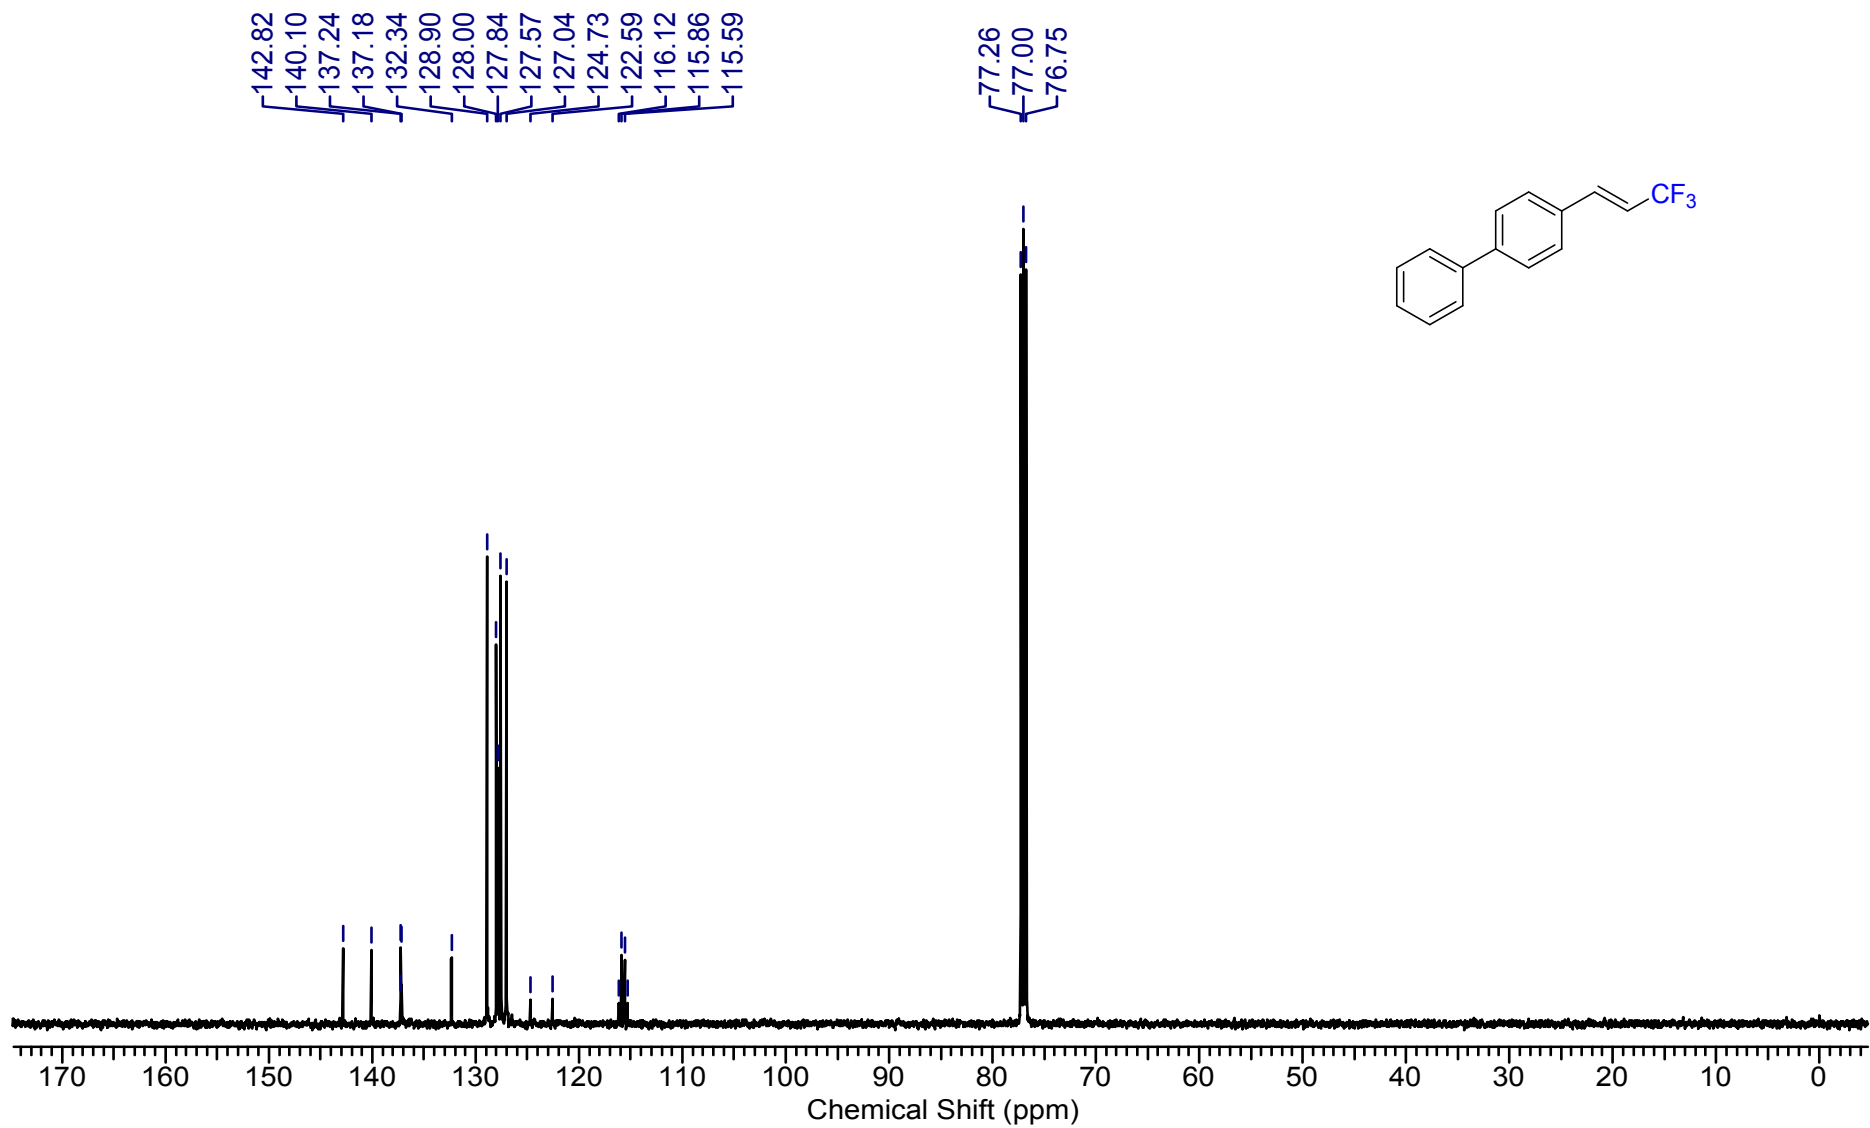

Figure S31b.  $^{13}\text{C}$  NMR of 3g

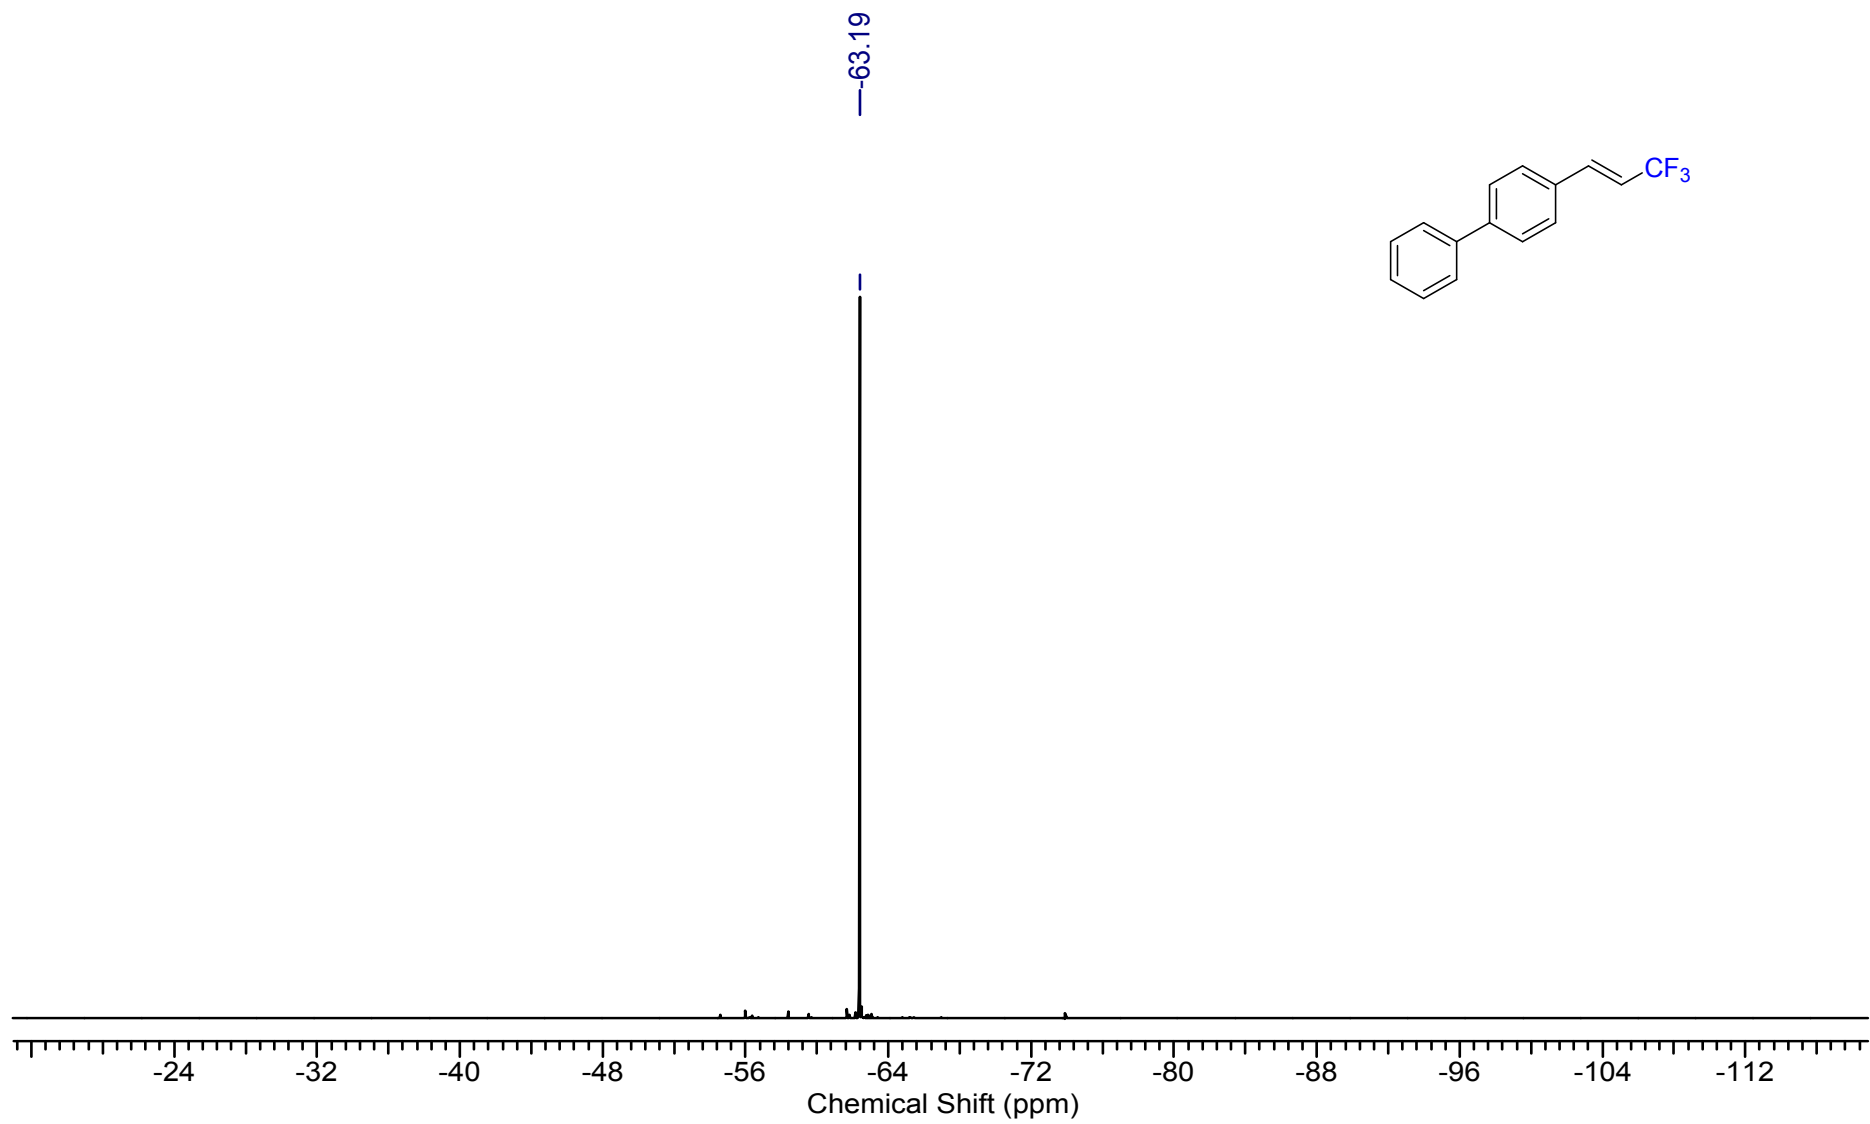

Figure S31C.  $^{19}\text{F}$  NMR of **3g**

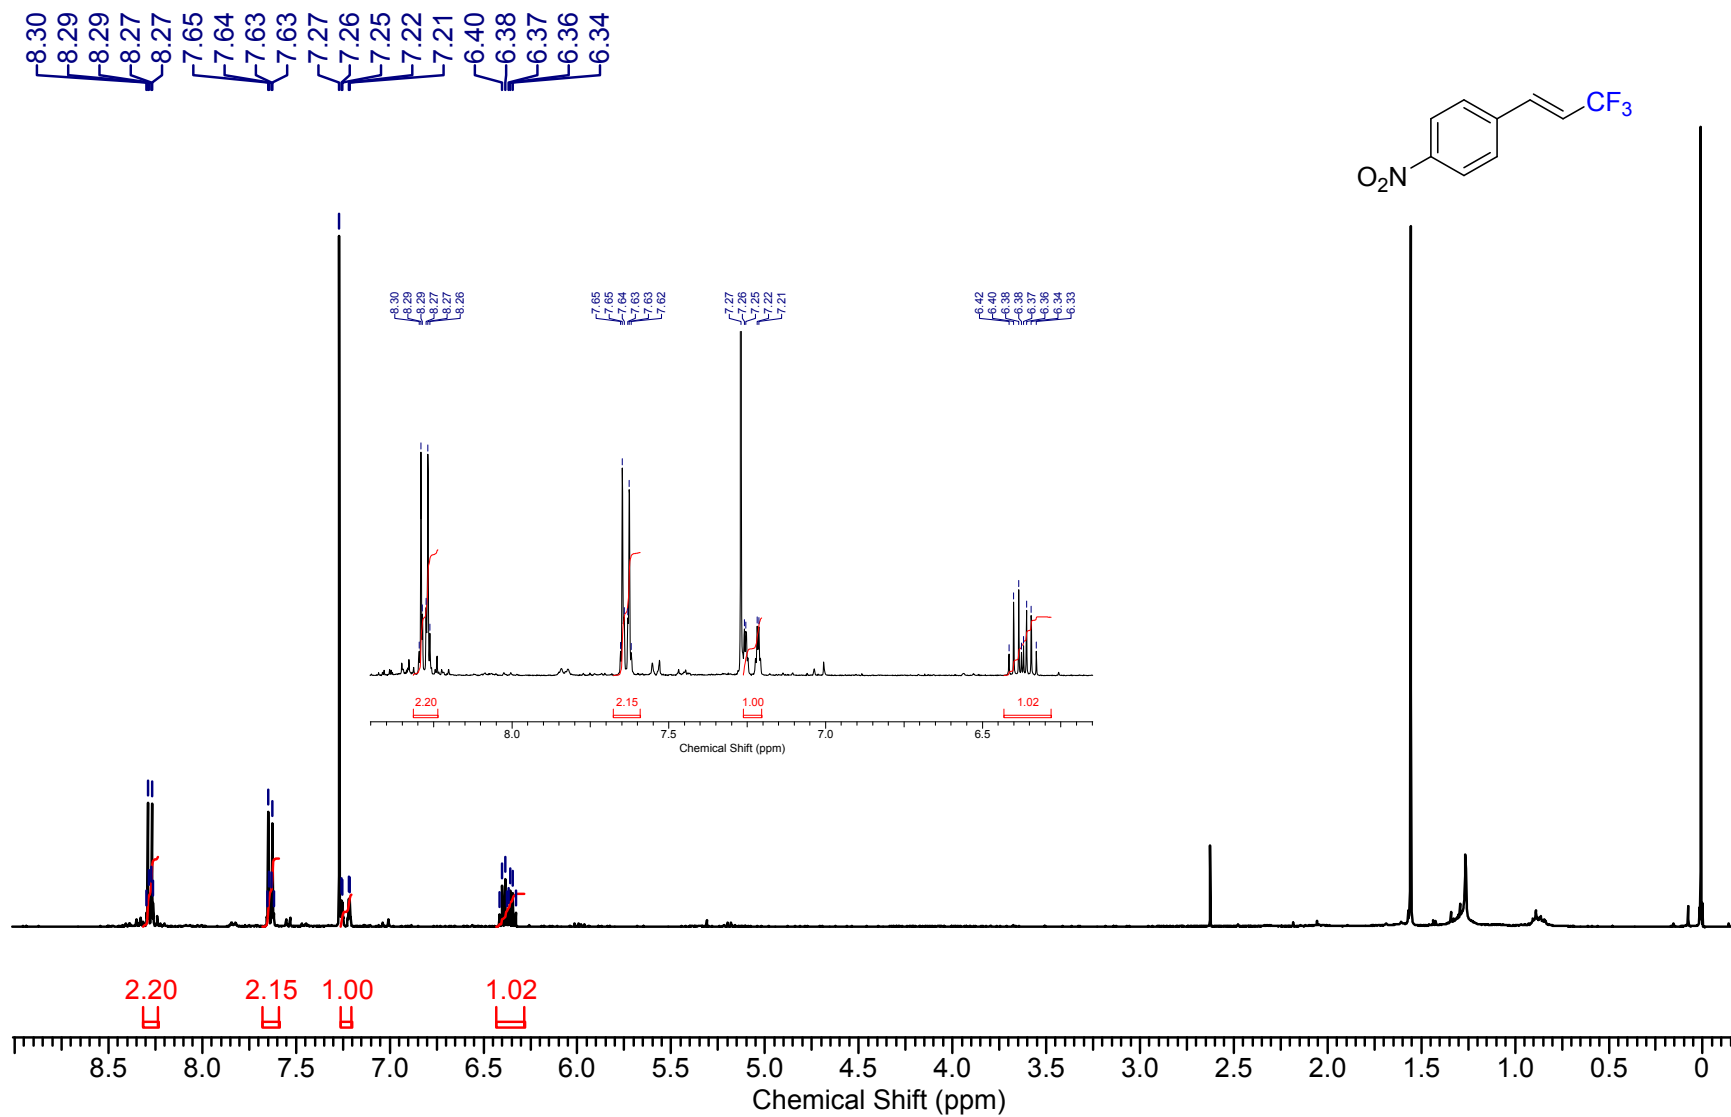

Figure S32a. <sup>1</sup>H NMR of 3h

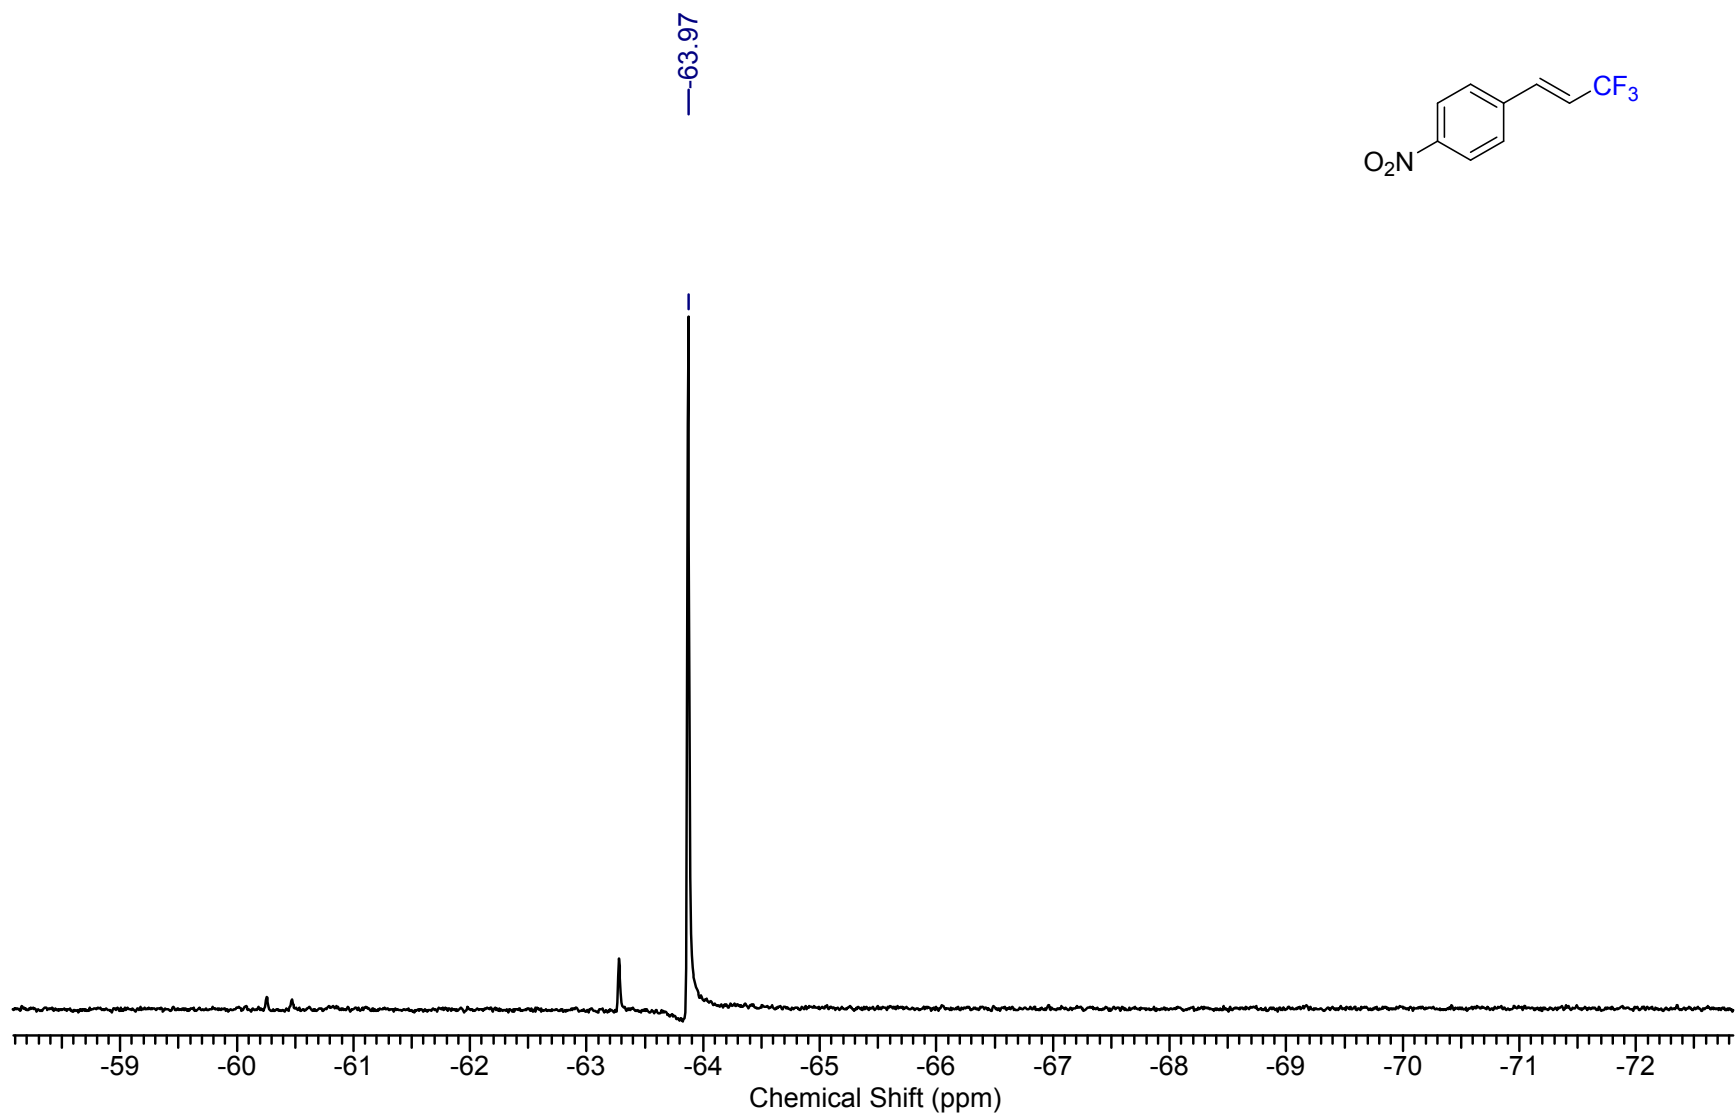

**Figure S32b.**  $^{19}\text{F}$  NMR of **3h**

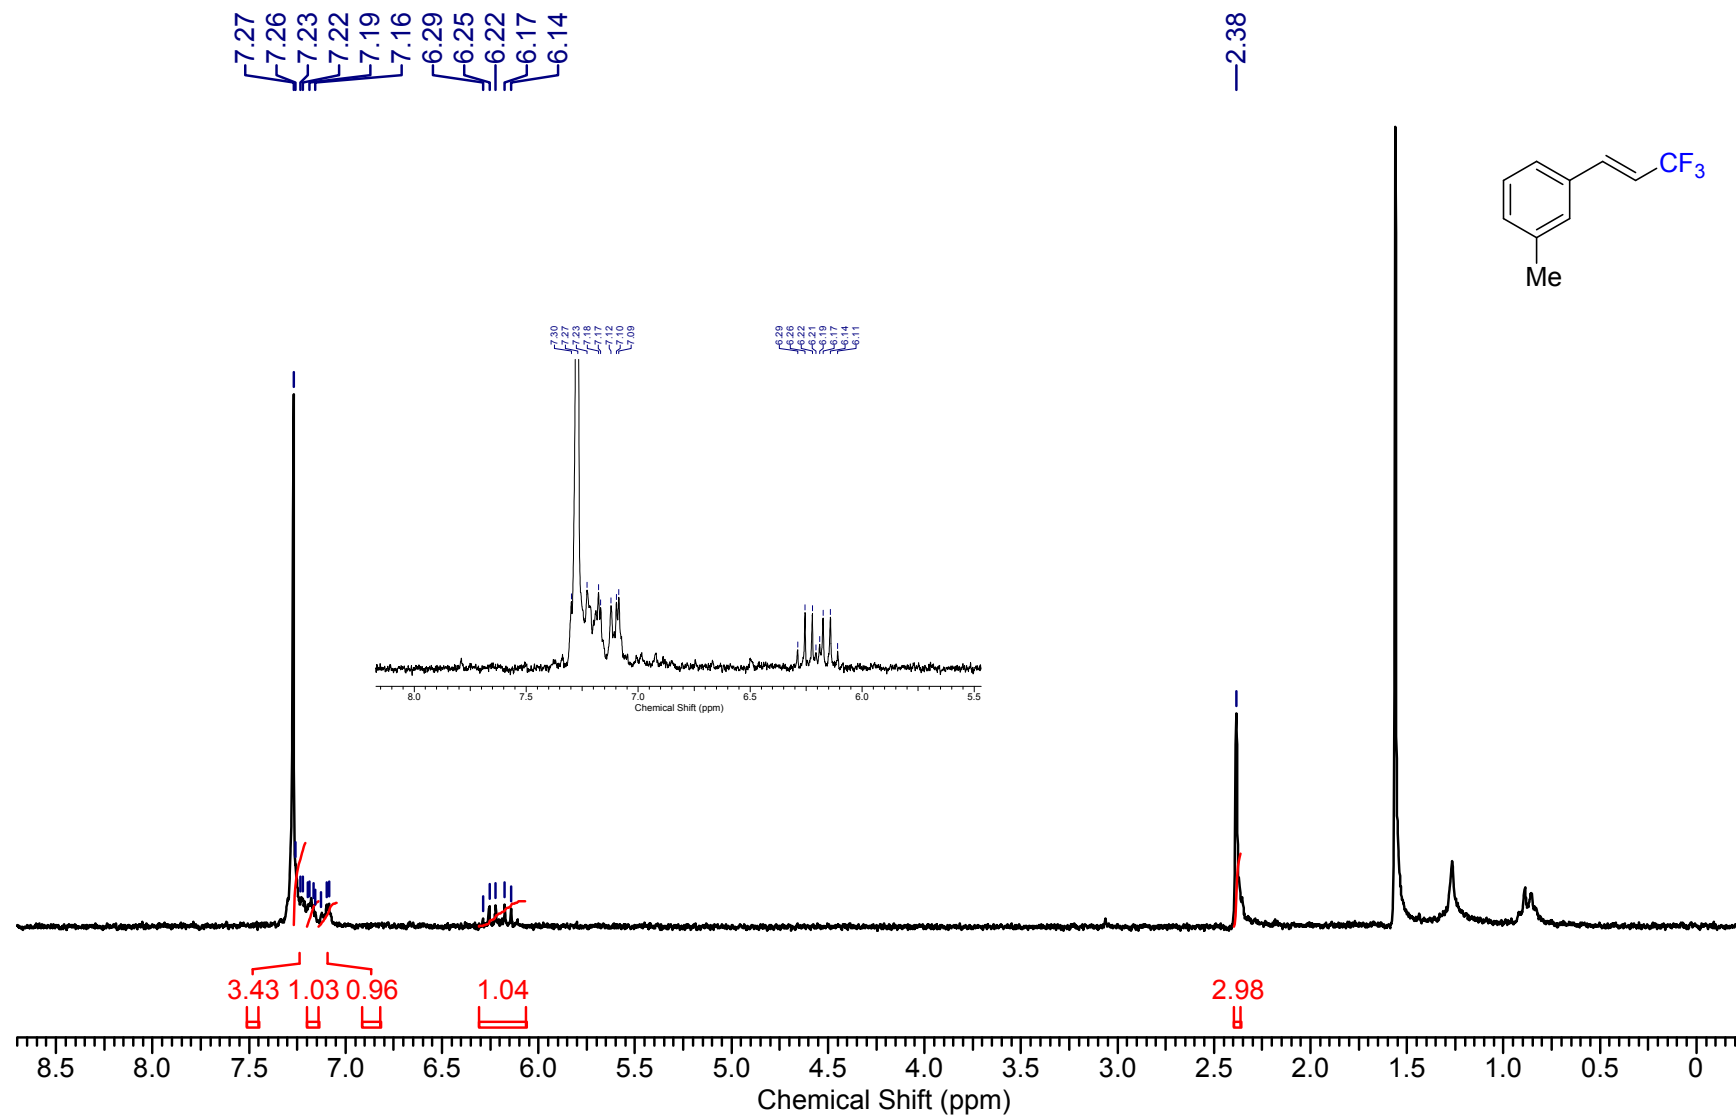

Figure S33a. <sup>1</sup>H NMR of 3i



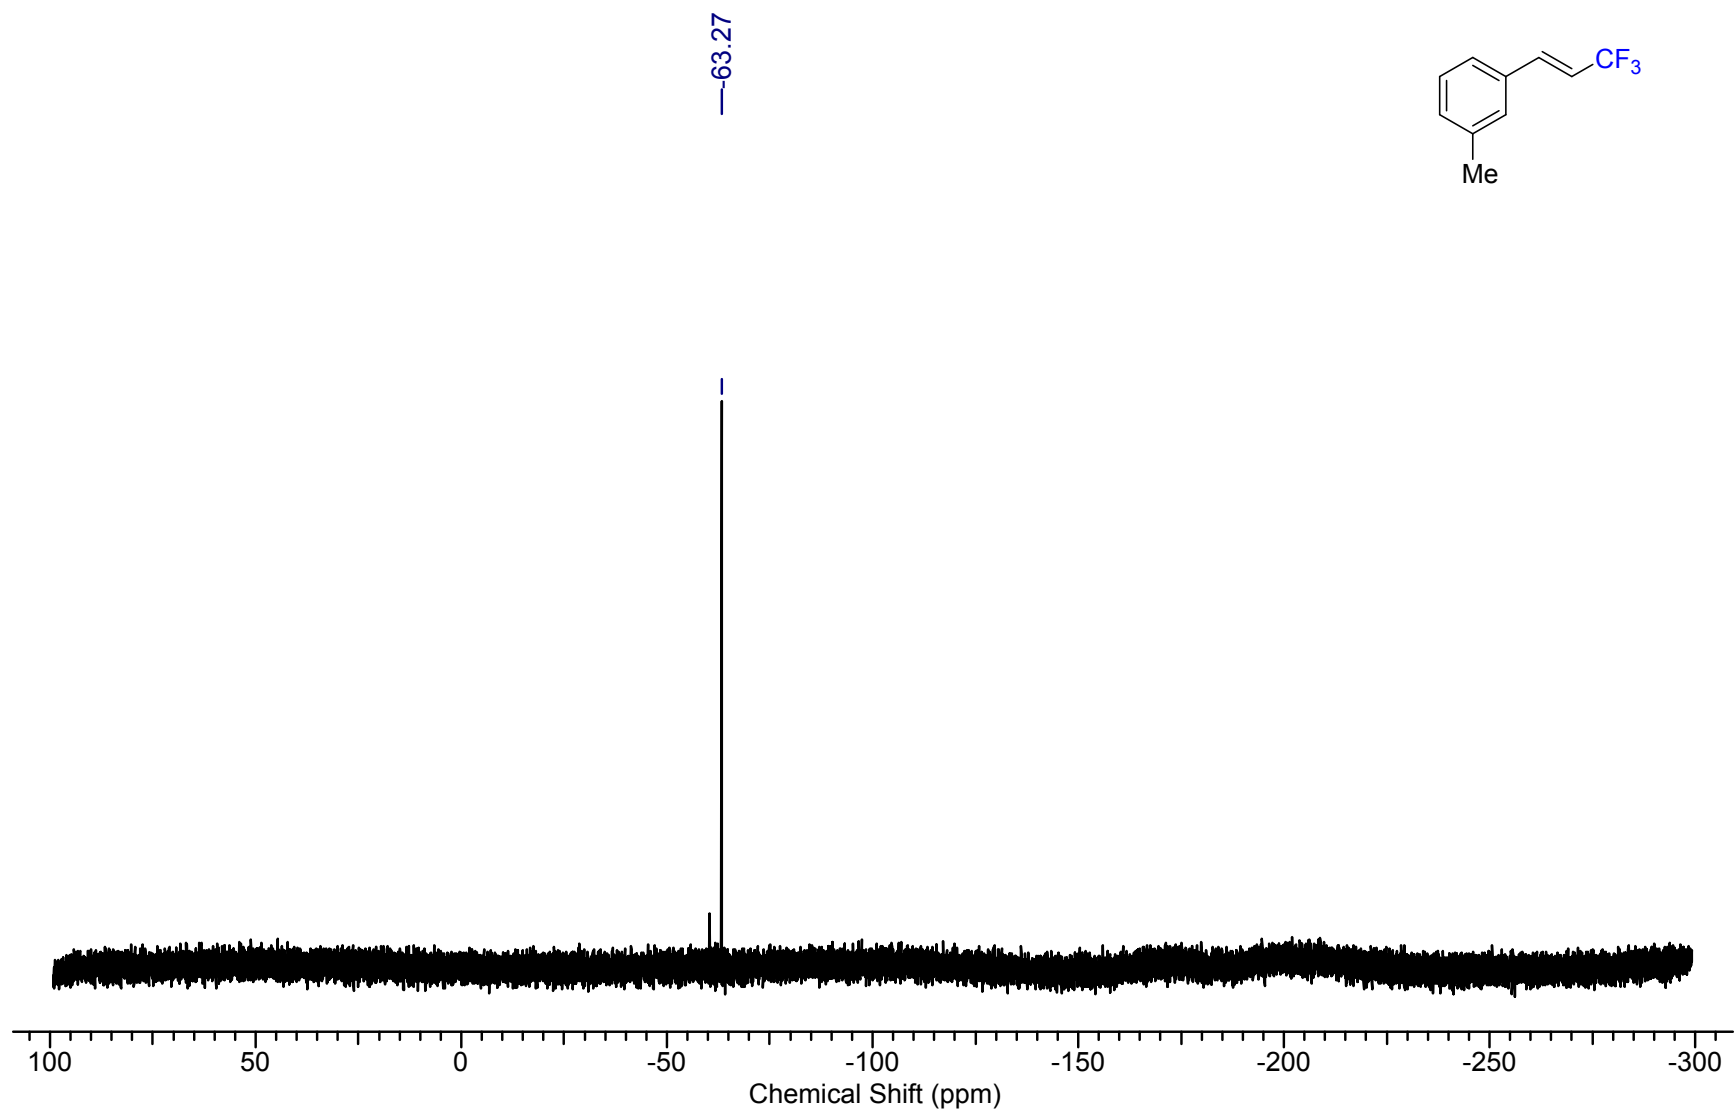

**Figure S33b.**  $^{19}\text{F}$  NMR of **3i**

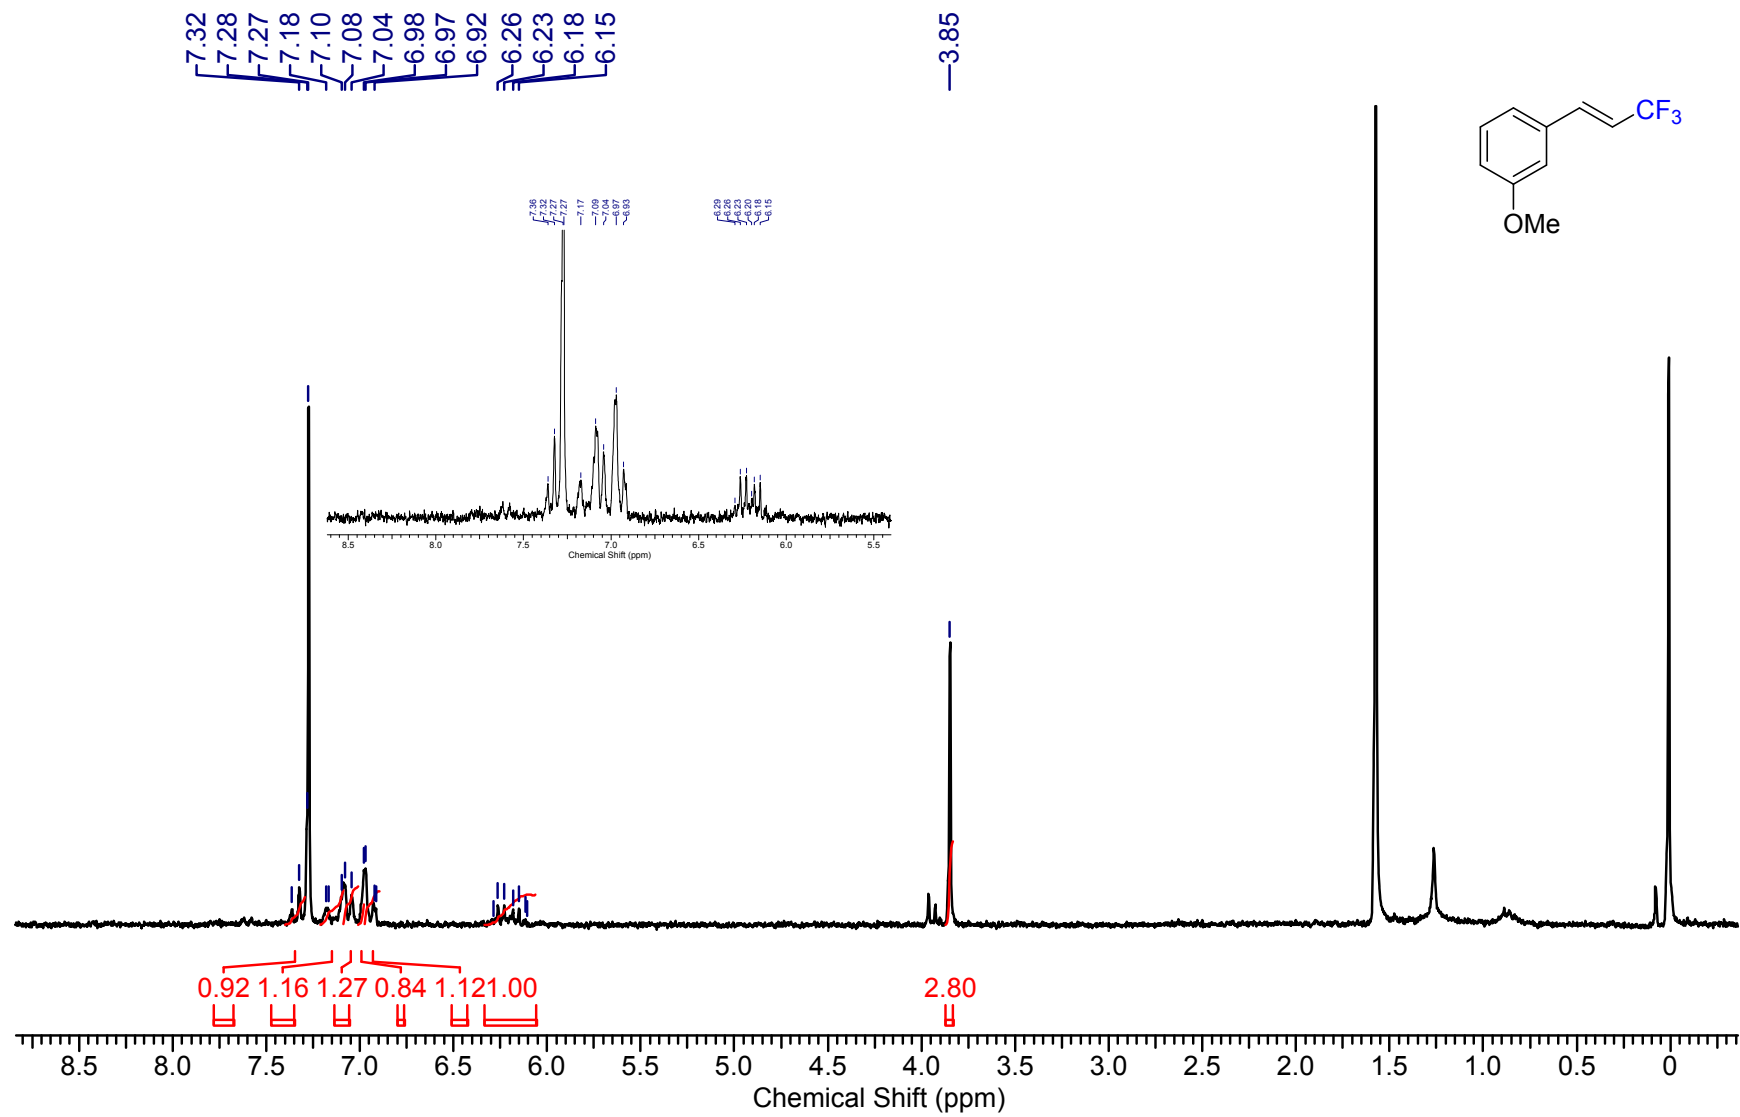

Figure S34a.  $^1\text{H}$  NMR of 3j

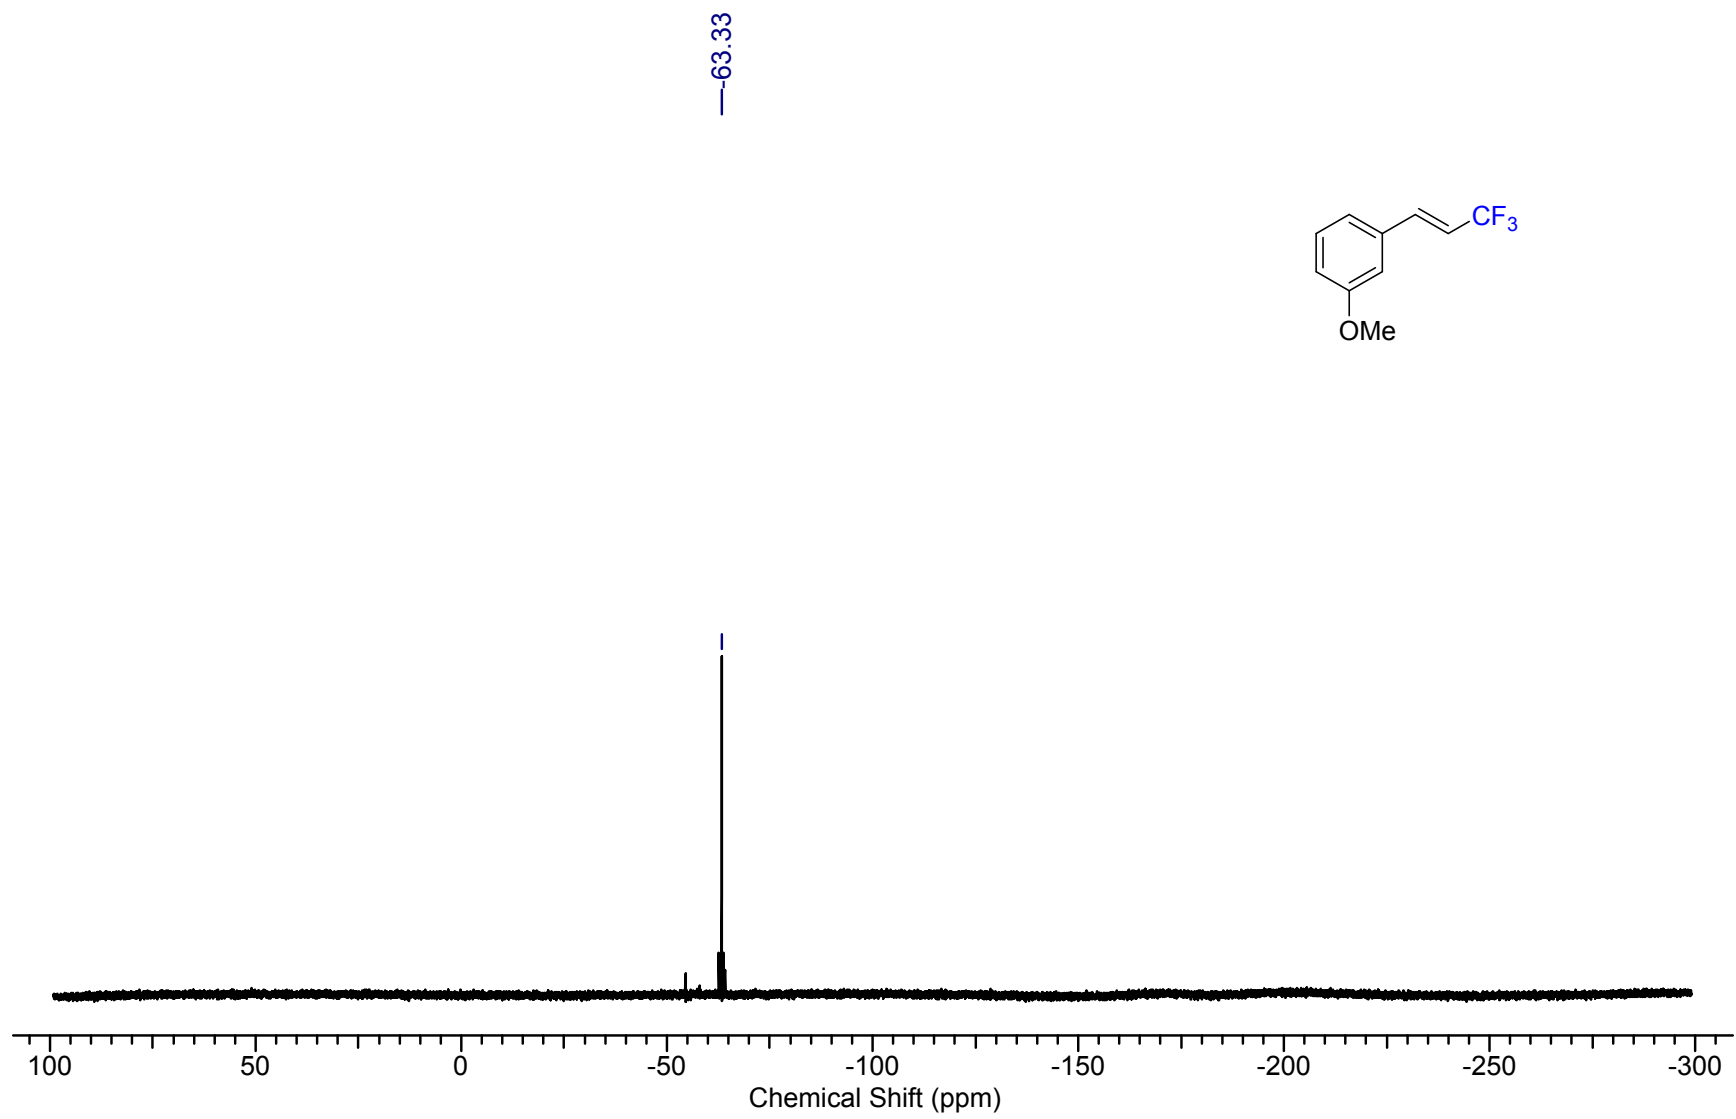

**Figure S34b.**  $^{19}\text{F}$  NMR of 3j

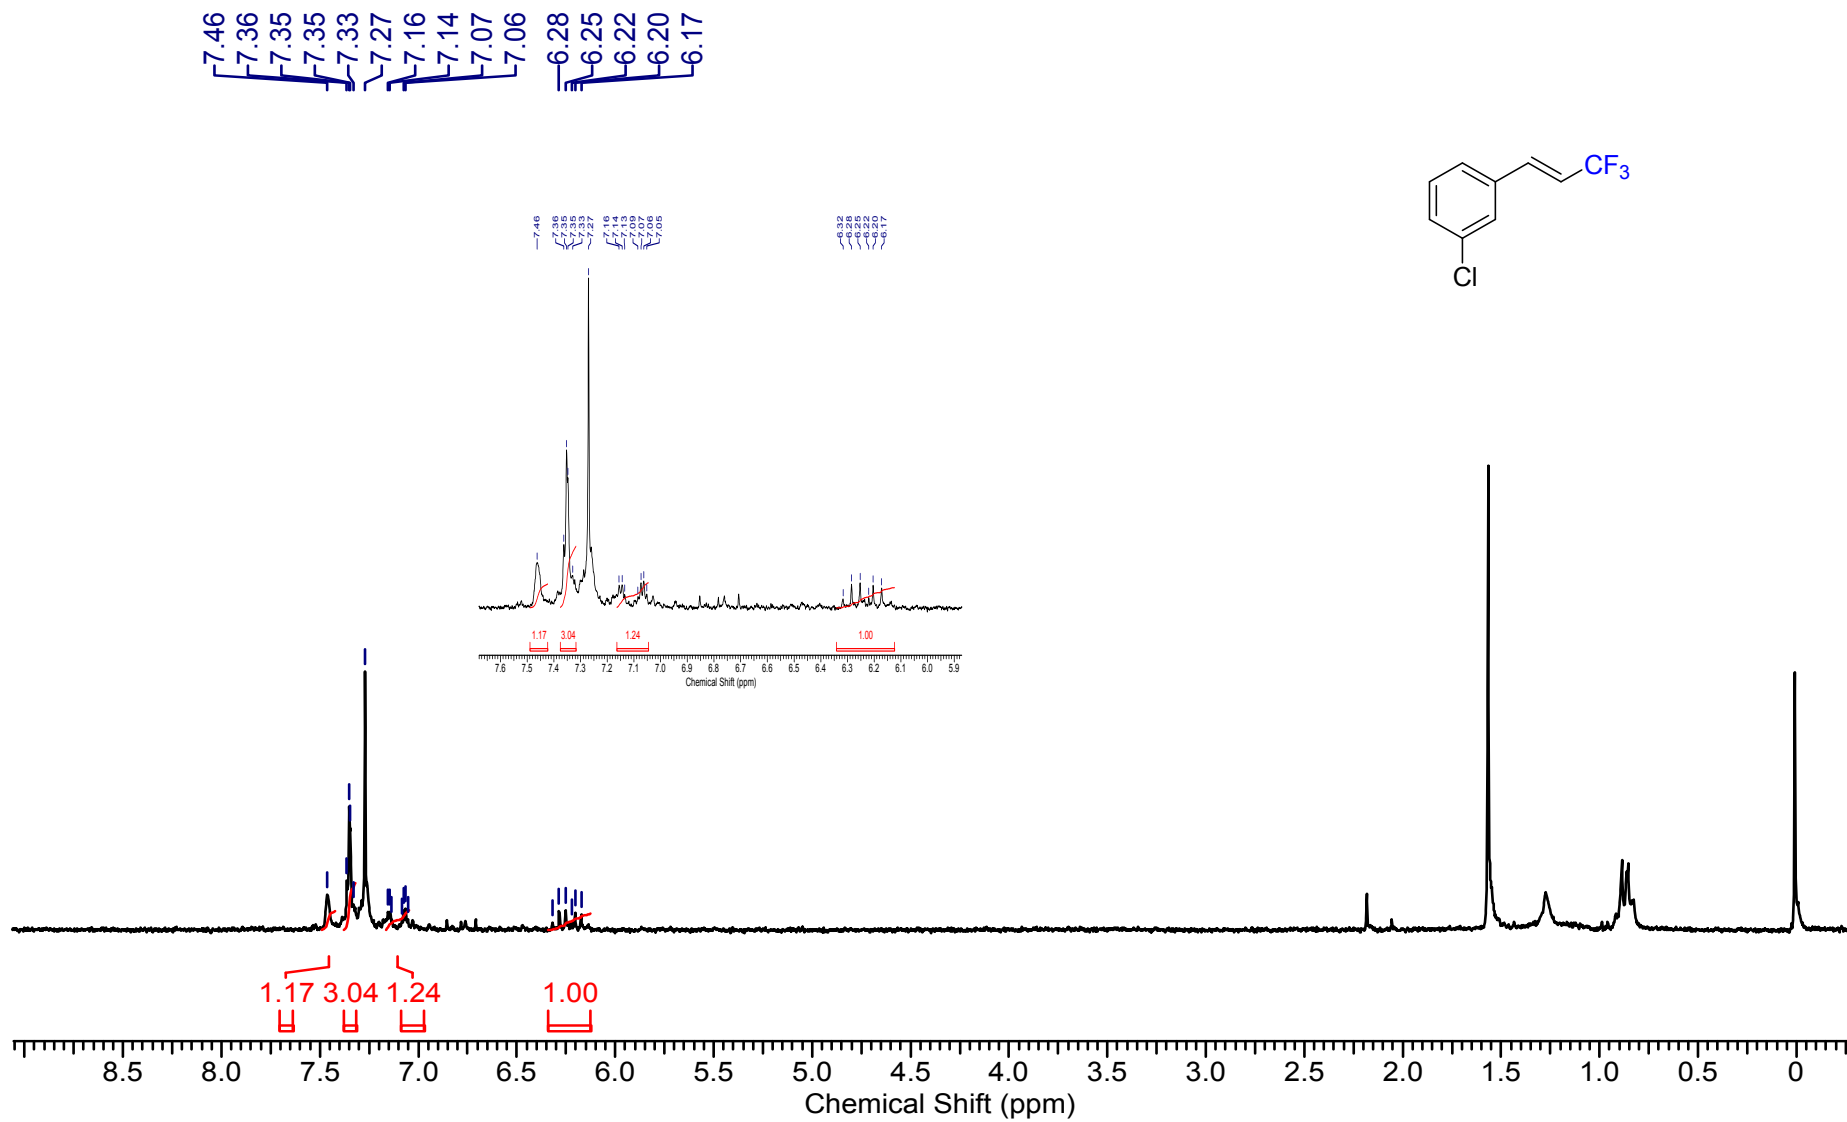

Figure S35a.  $^1\text{H}$  NMR of 3k

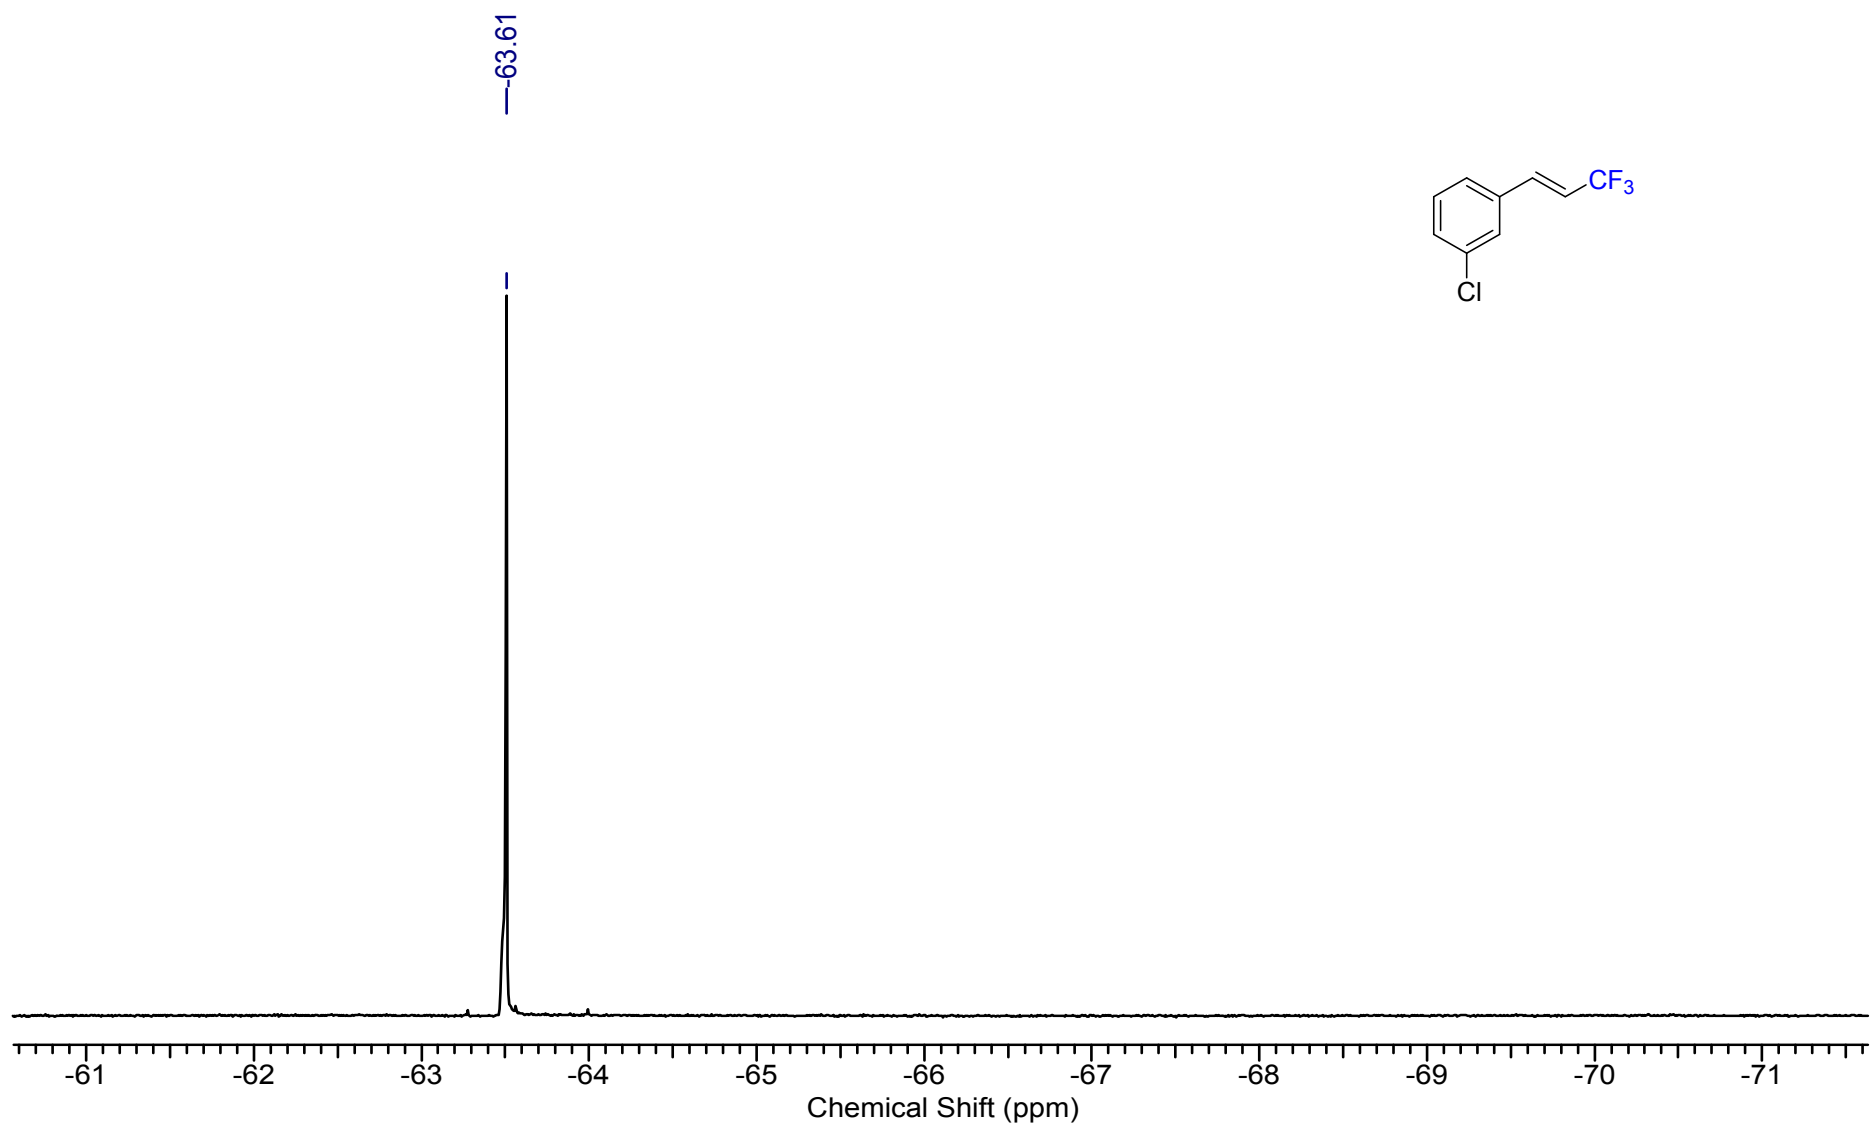

**Figure S35b.**  $^{19}\text{F}$  NMR of **3k**

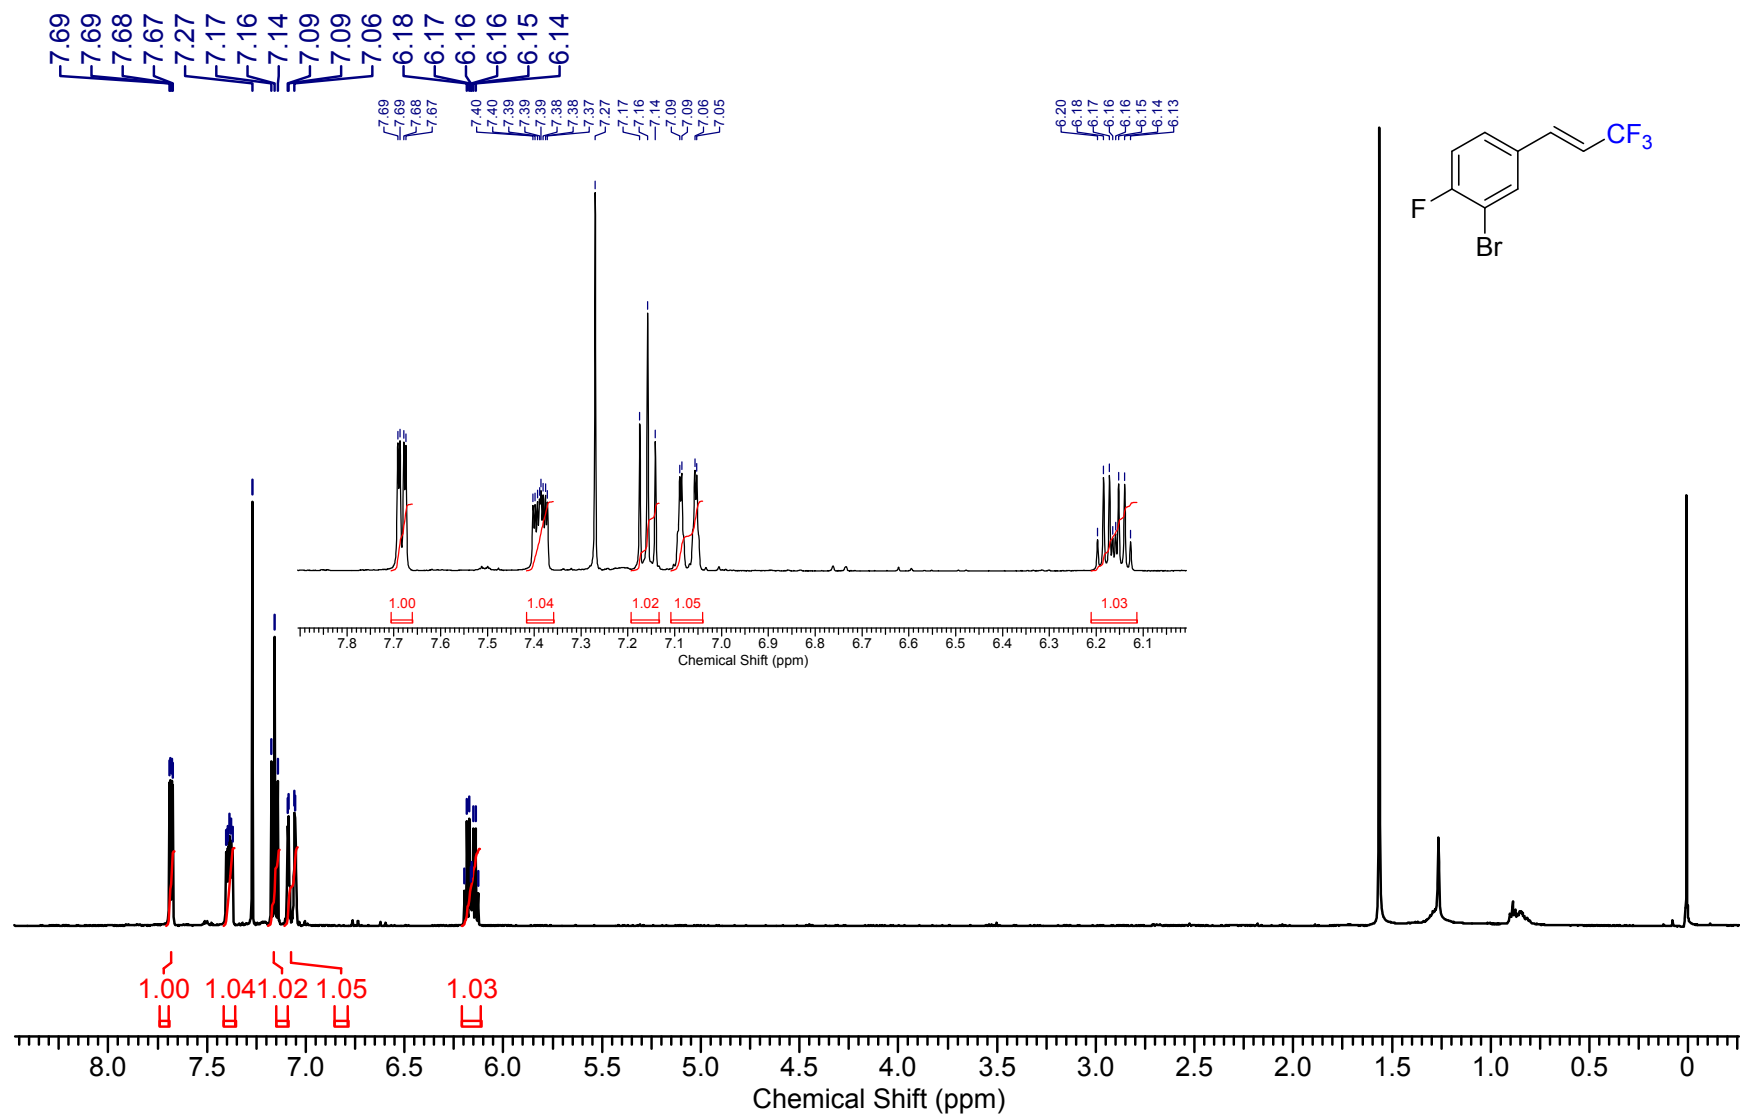

Figure S36a. <sup>1</sup>H NMR of 31

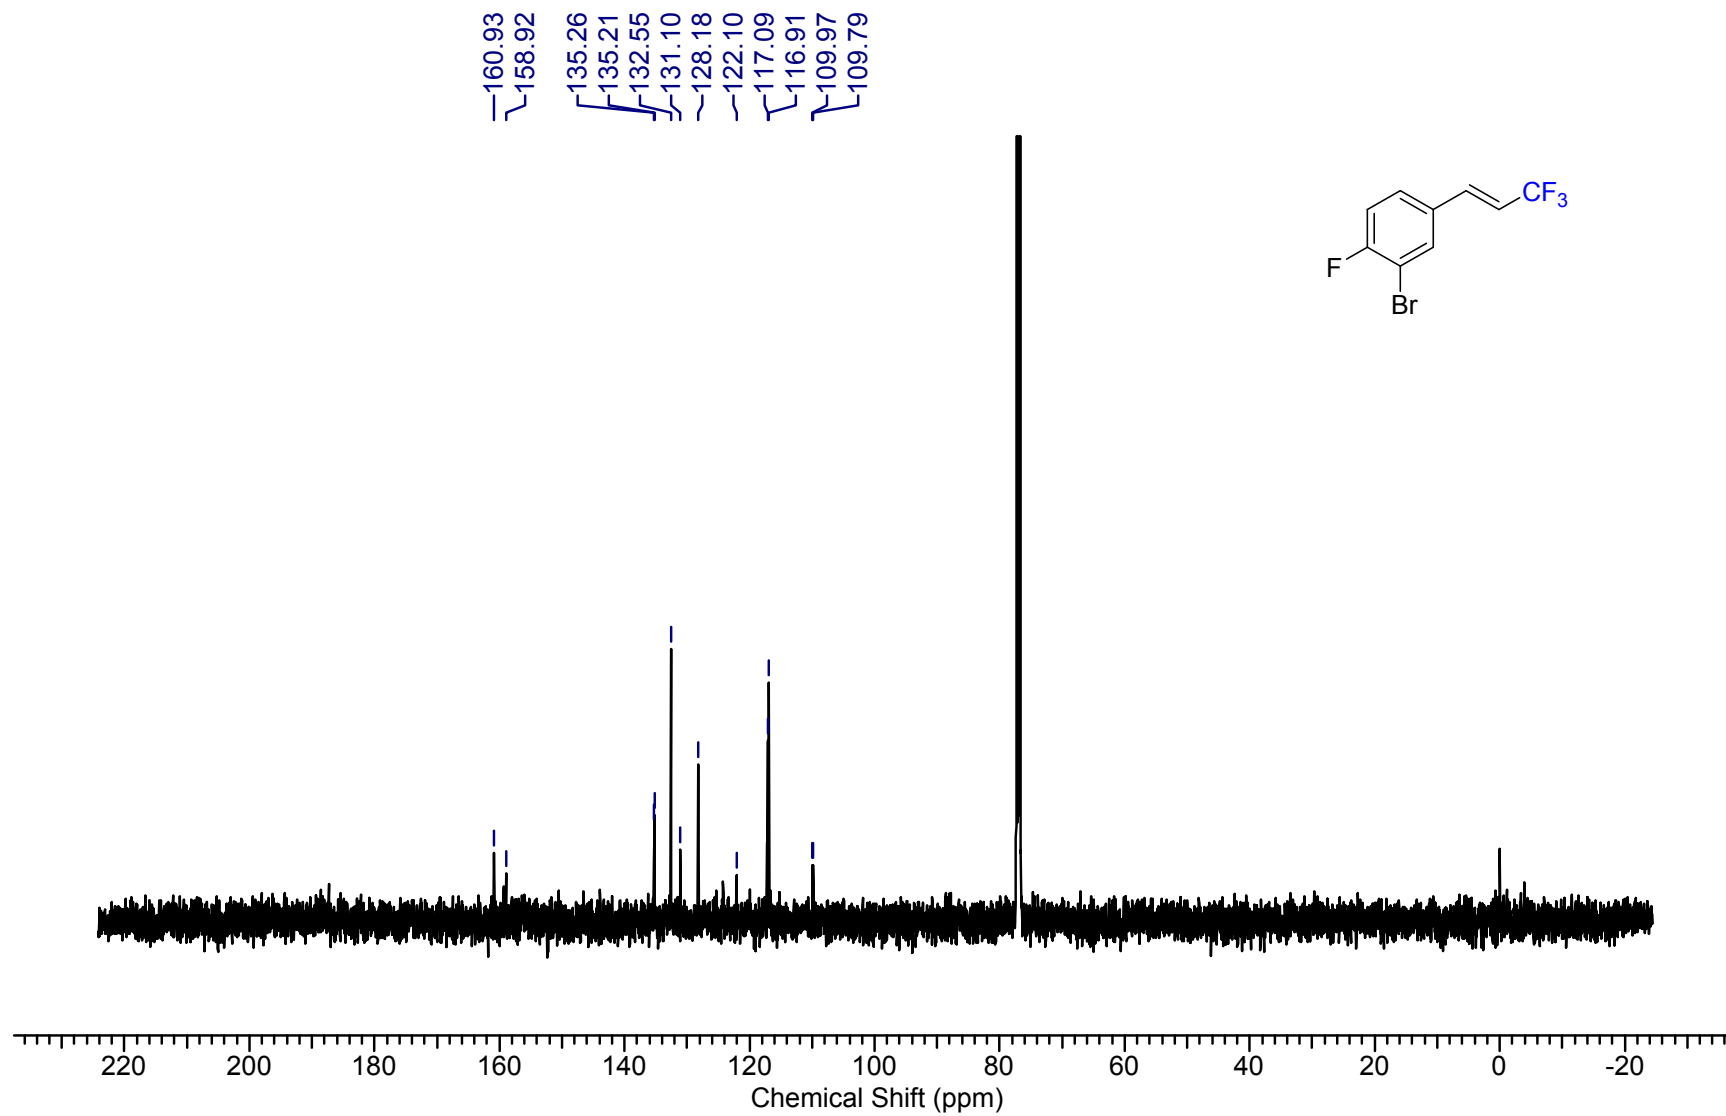

Figure S36b. <sup>13</sup>C NMR of 3I

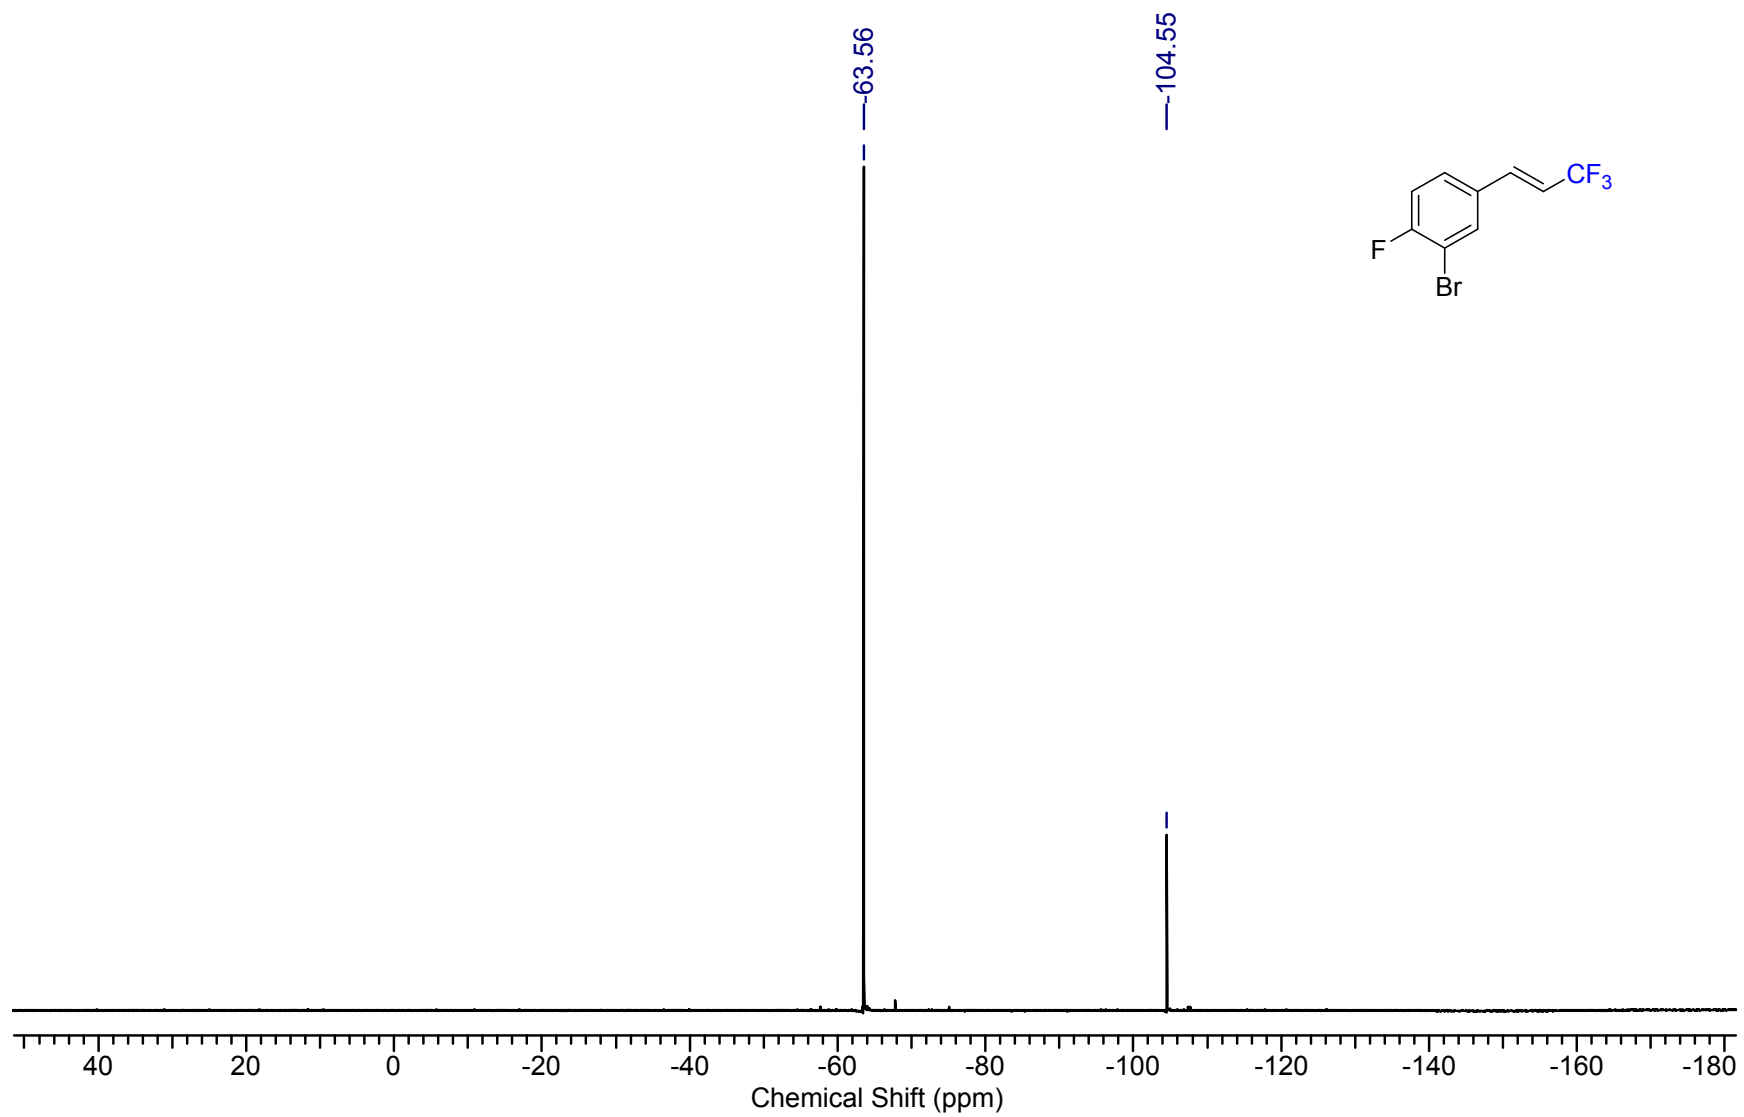

Figure S36c. <sup>19</sup>F NMR of 31



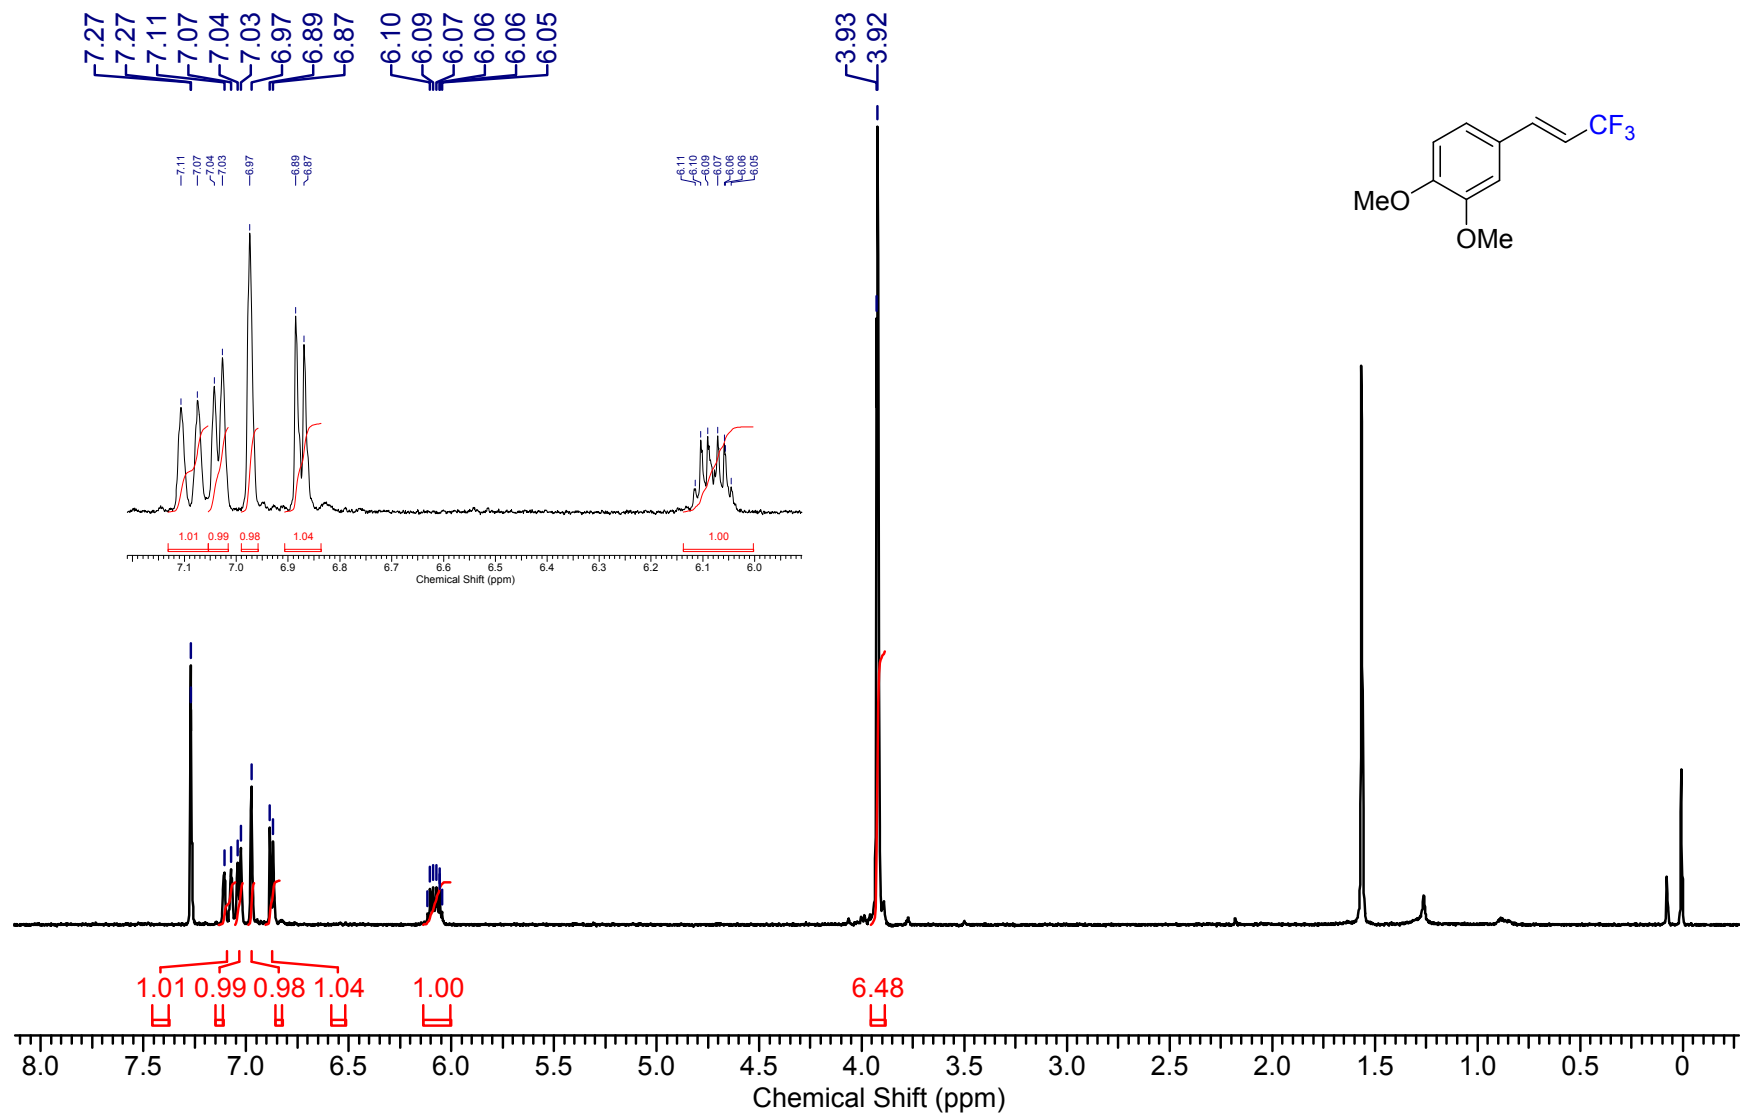

Figure S37a. <sup>1</sup>H NMR of 3m

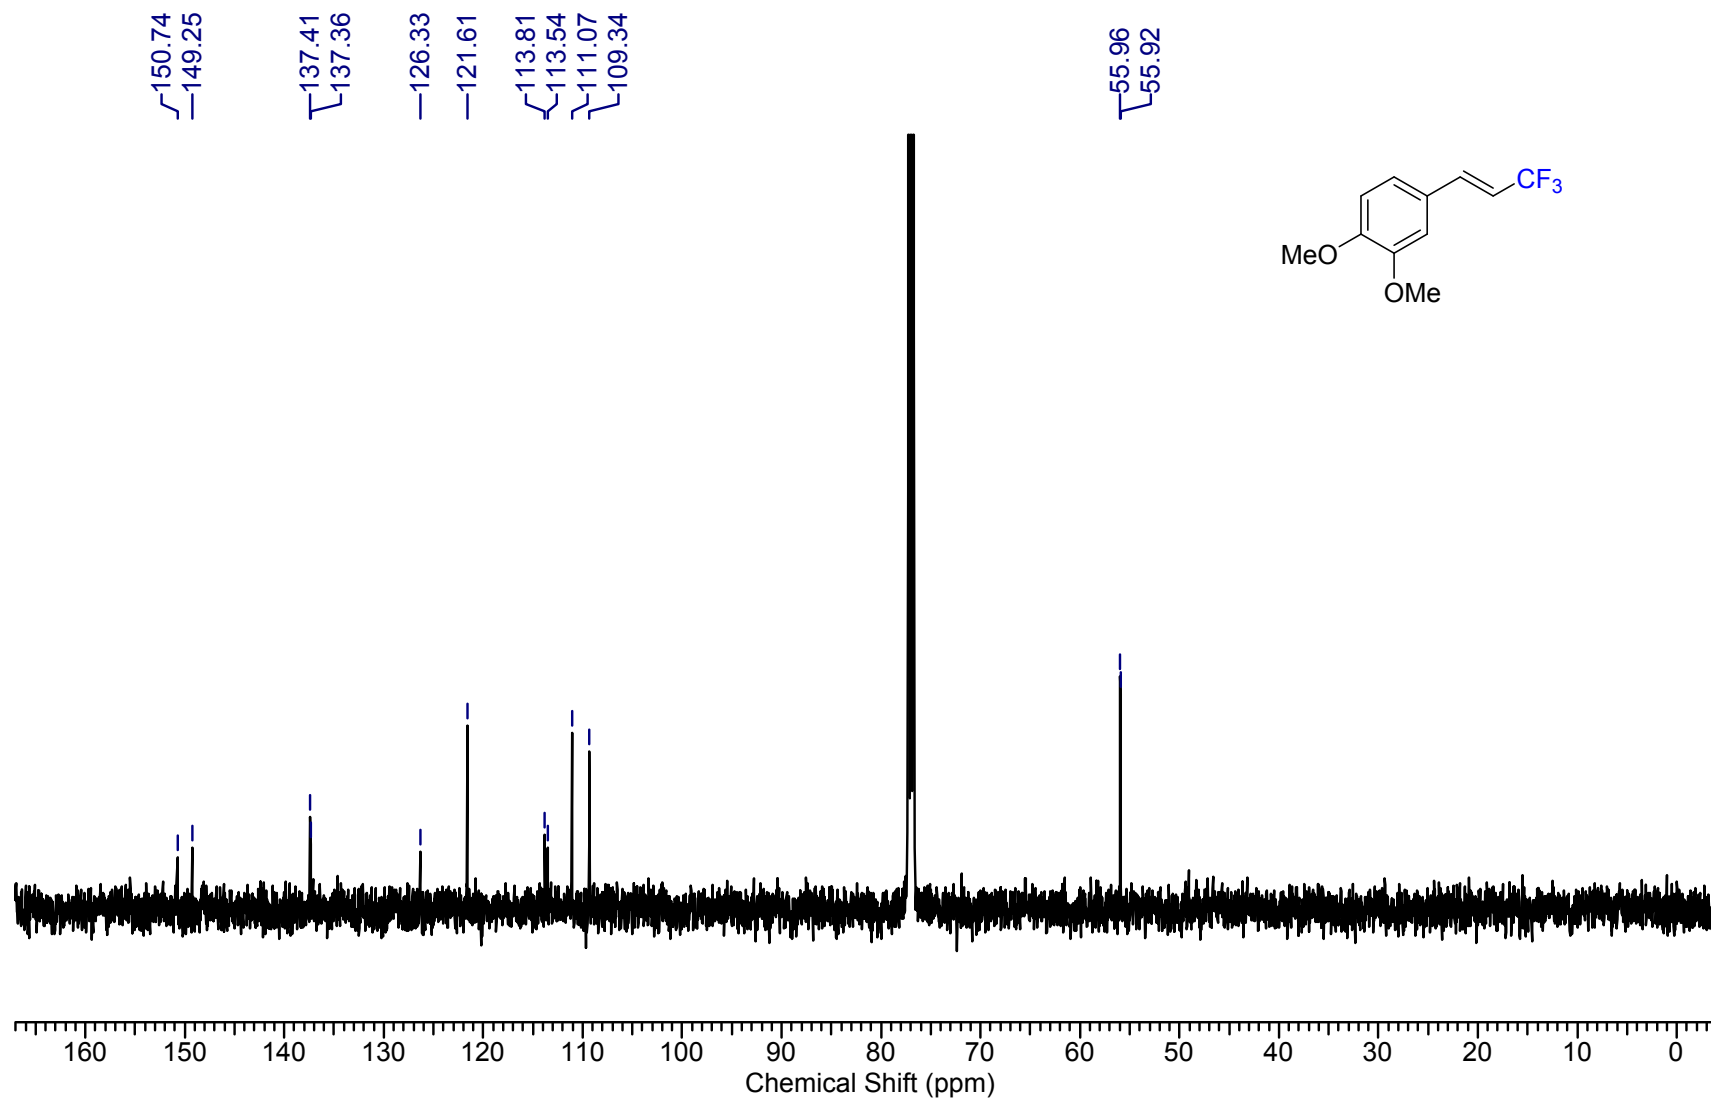

Figure S37b.  $^{13}\text{C}$  NMR of 3m

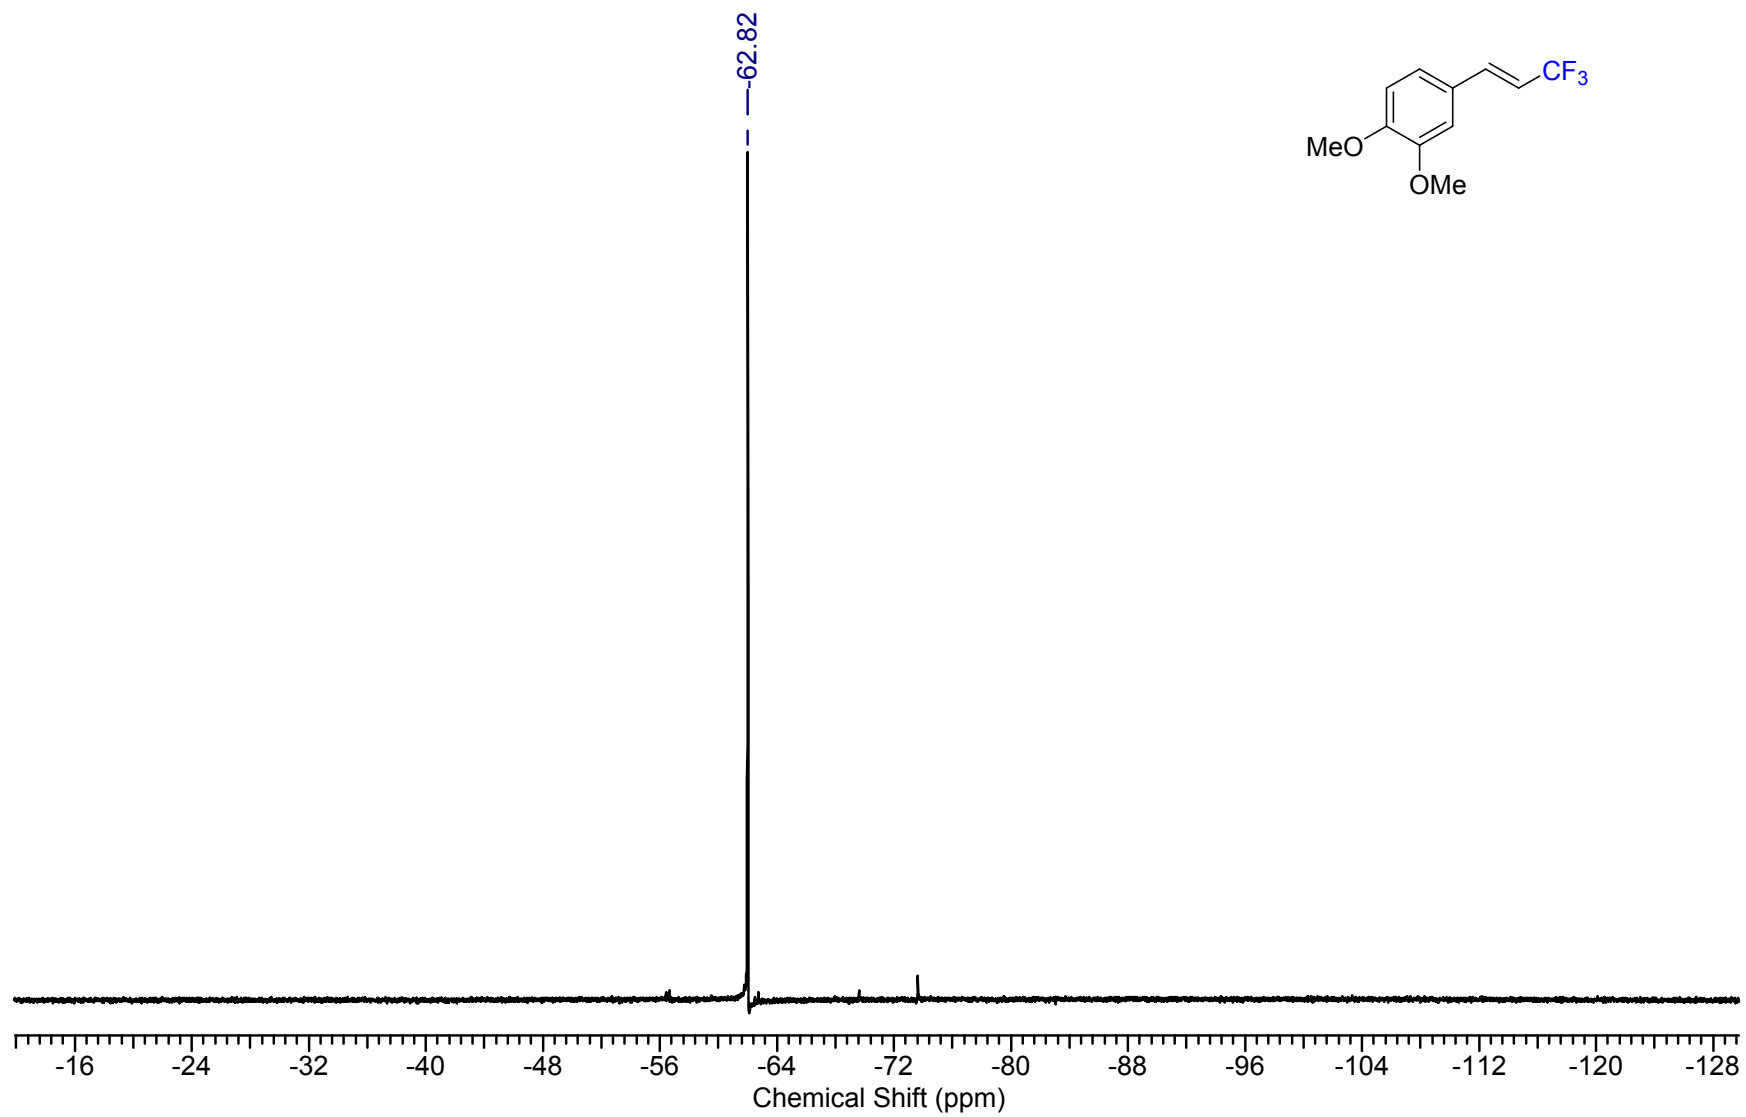

Figure S37c.  $^{19}\text{F}$  NMR of 3m

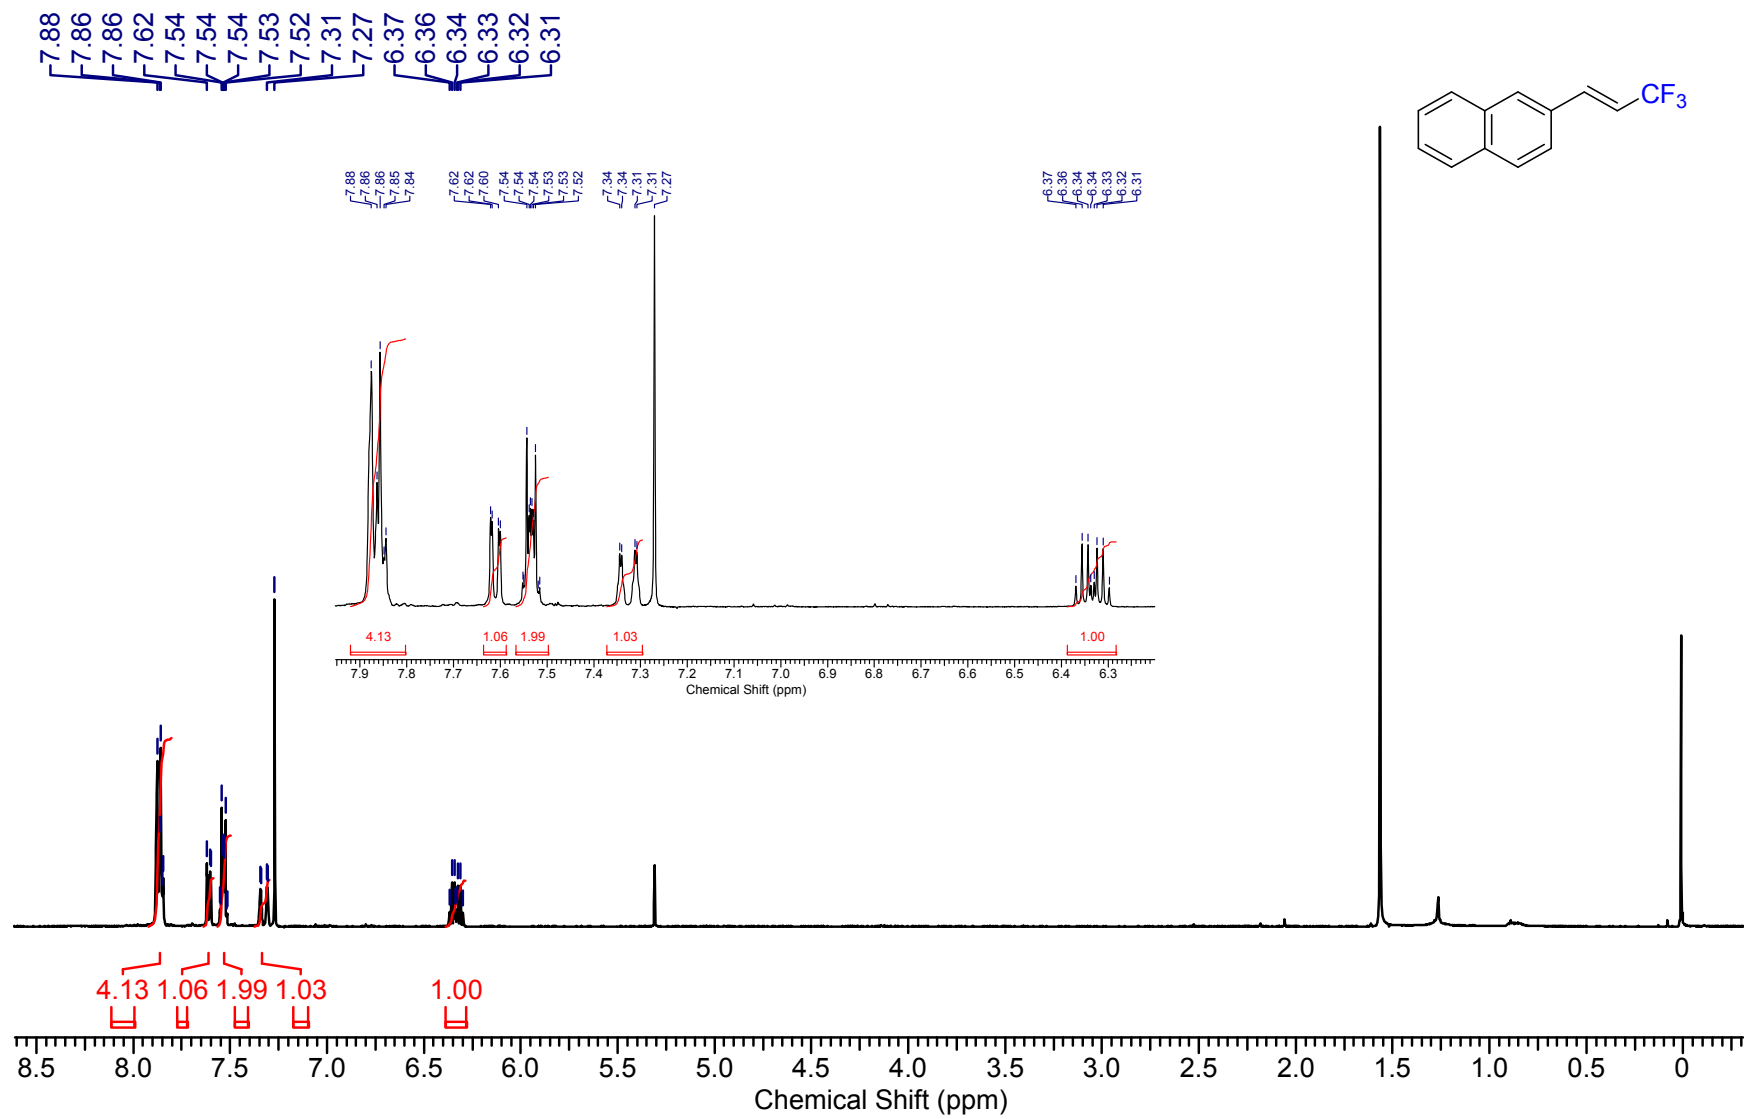

Figure S38a. <sup>1</sup>H NMR of 3n

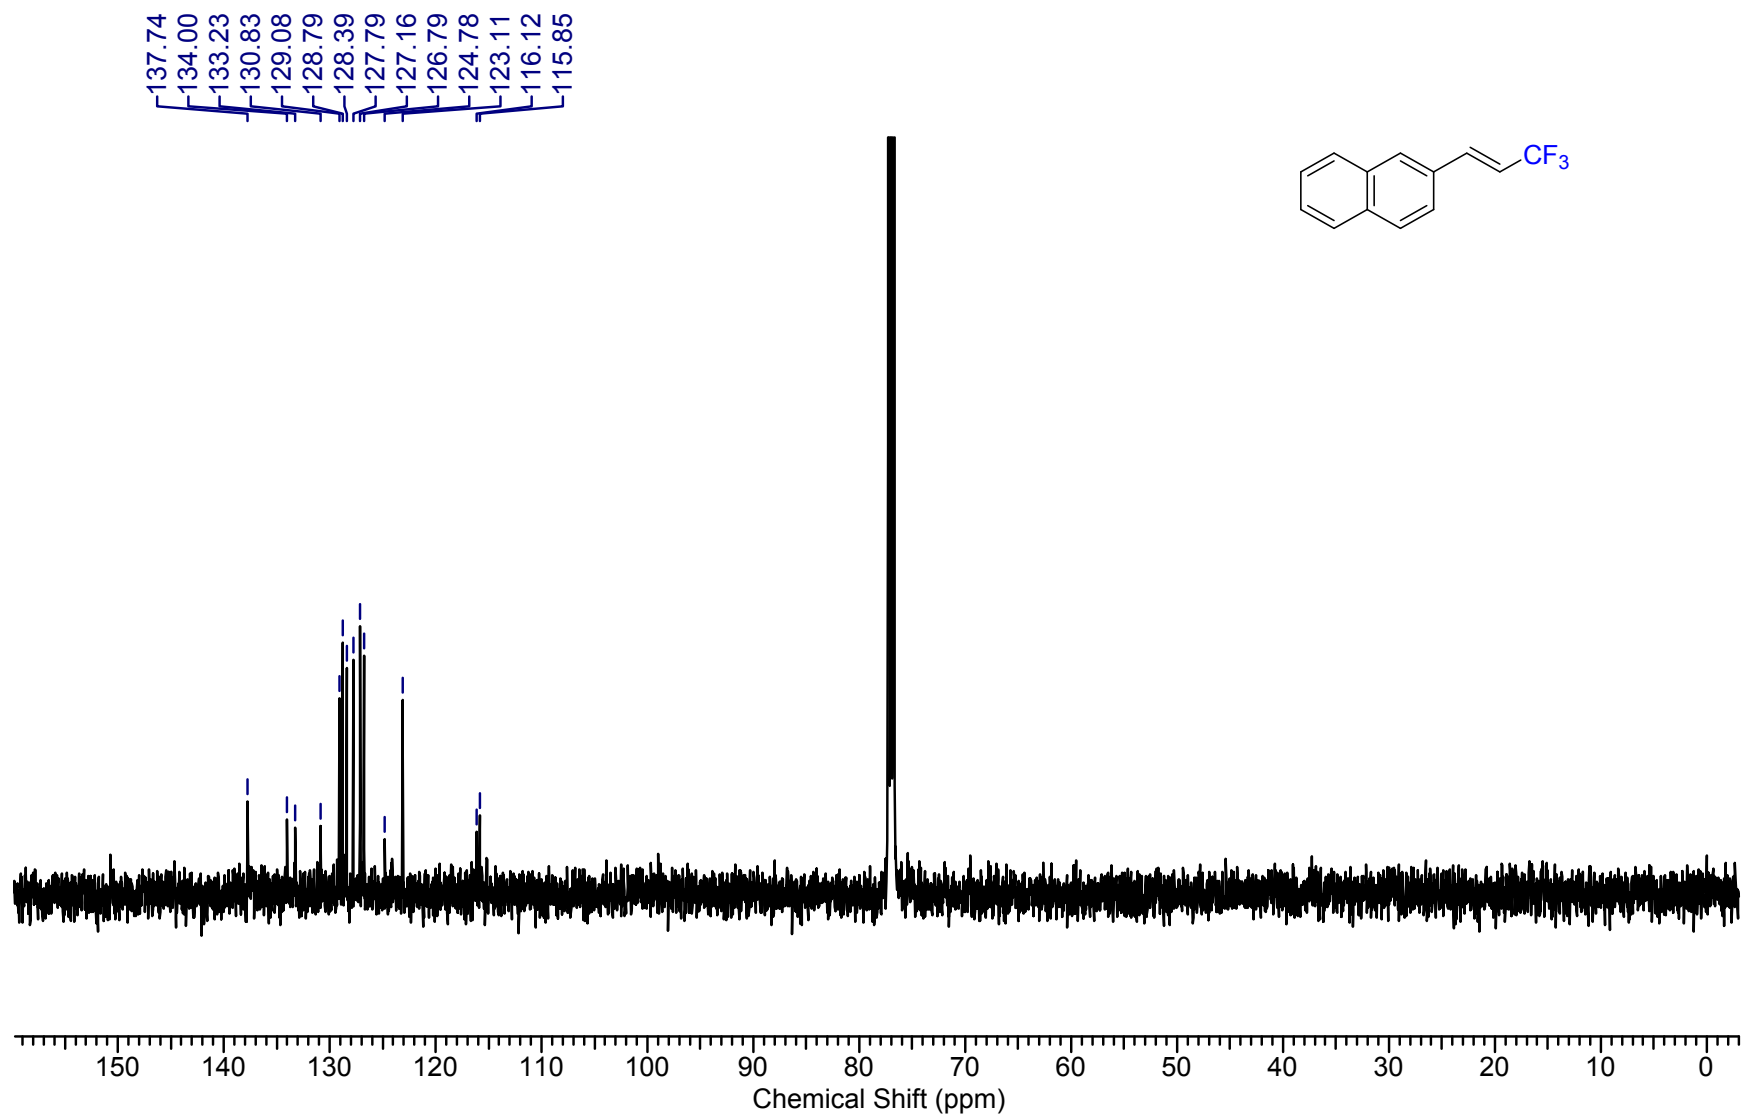

Figure S38b.  $^{13}\text{C}$  NMR of 3n

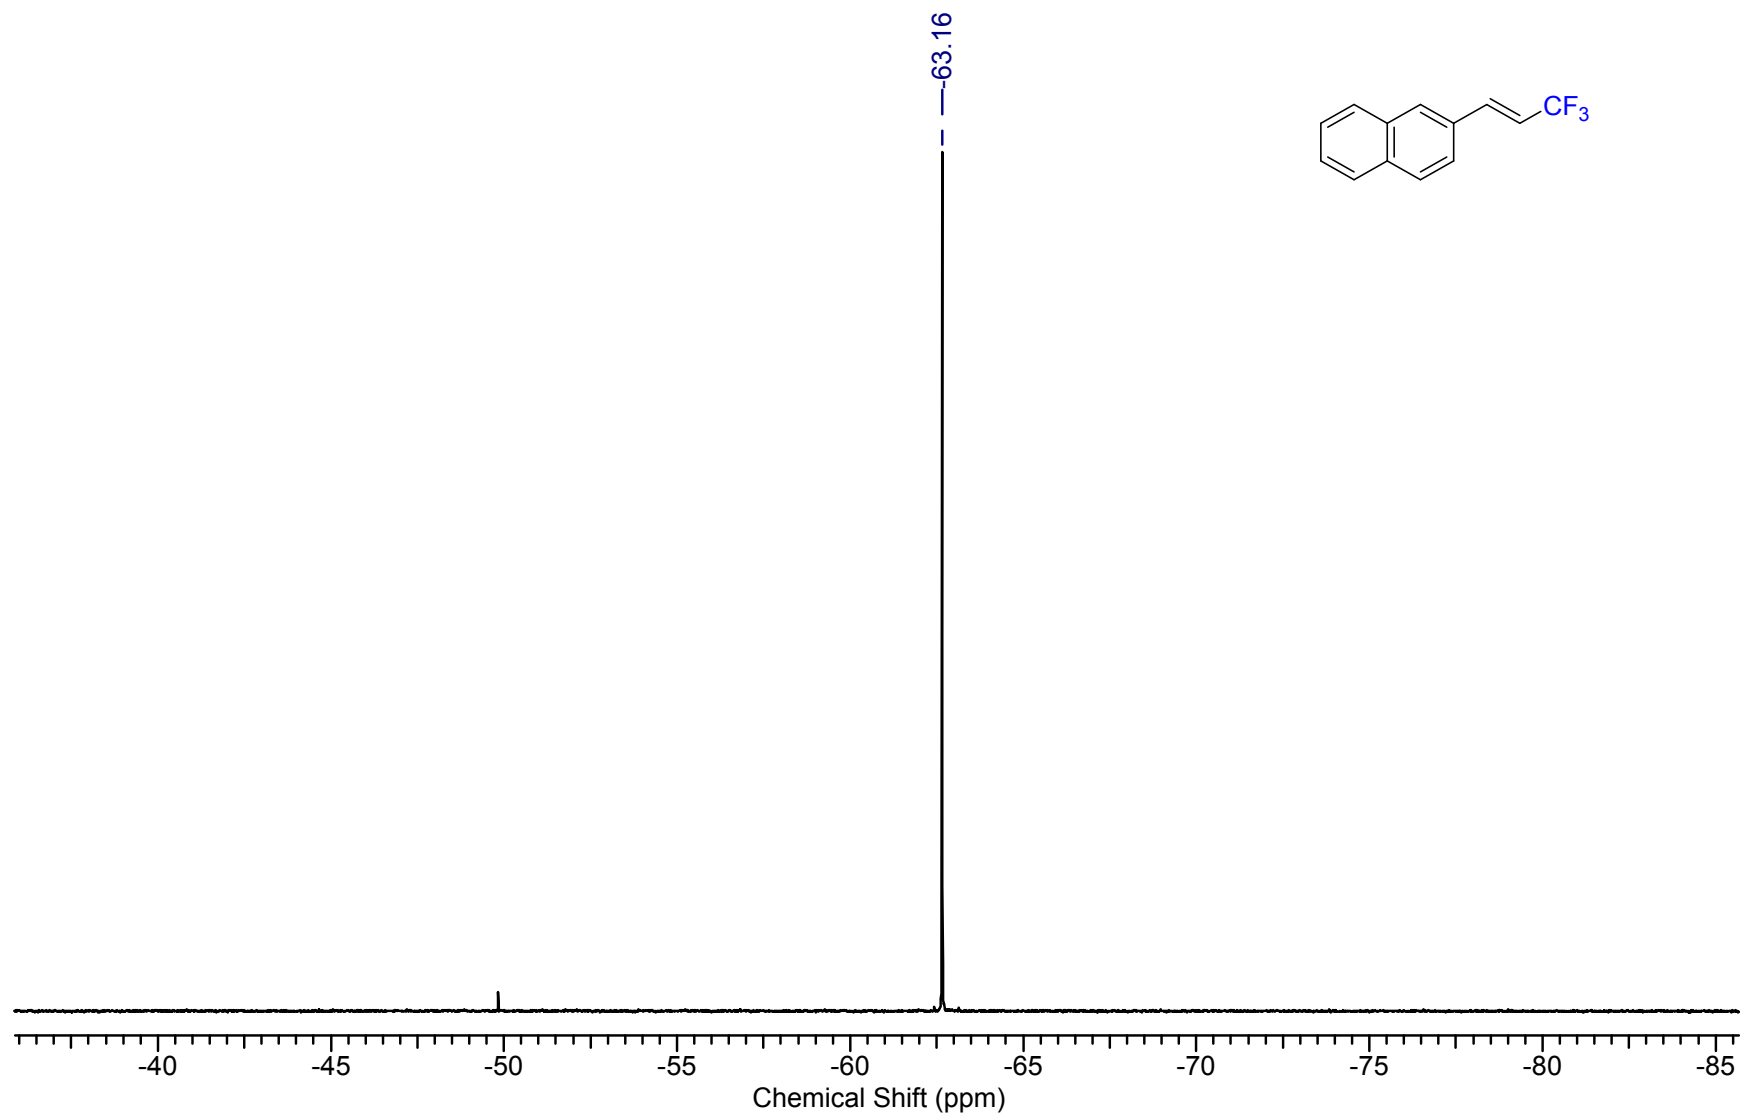

**Figure S38c.**  $^{19}\text{F}$  NMR of **3n**

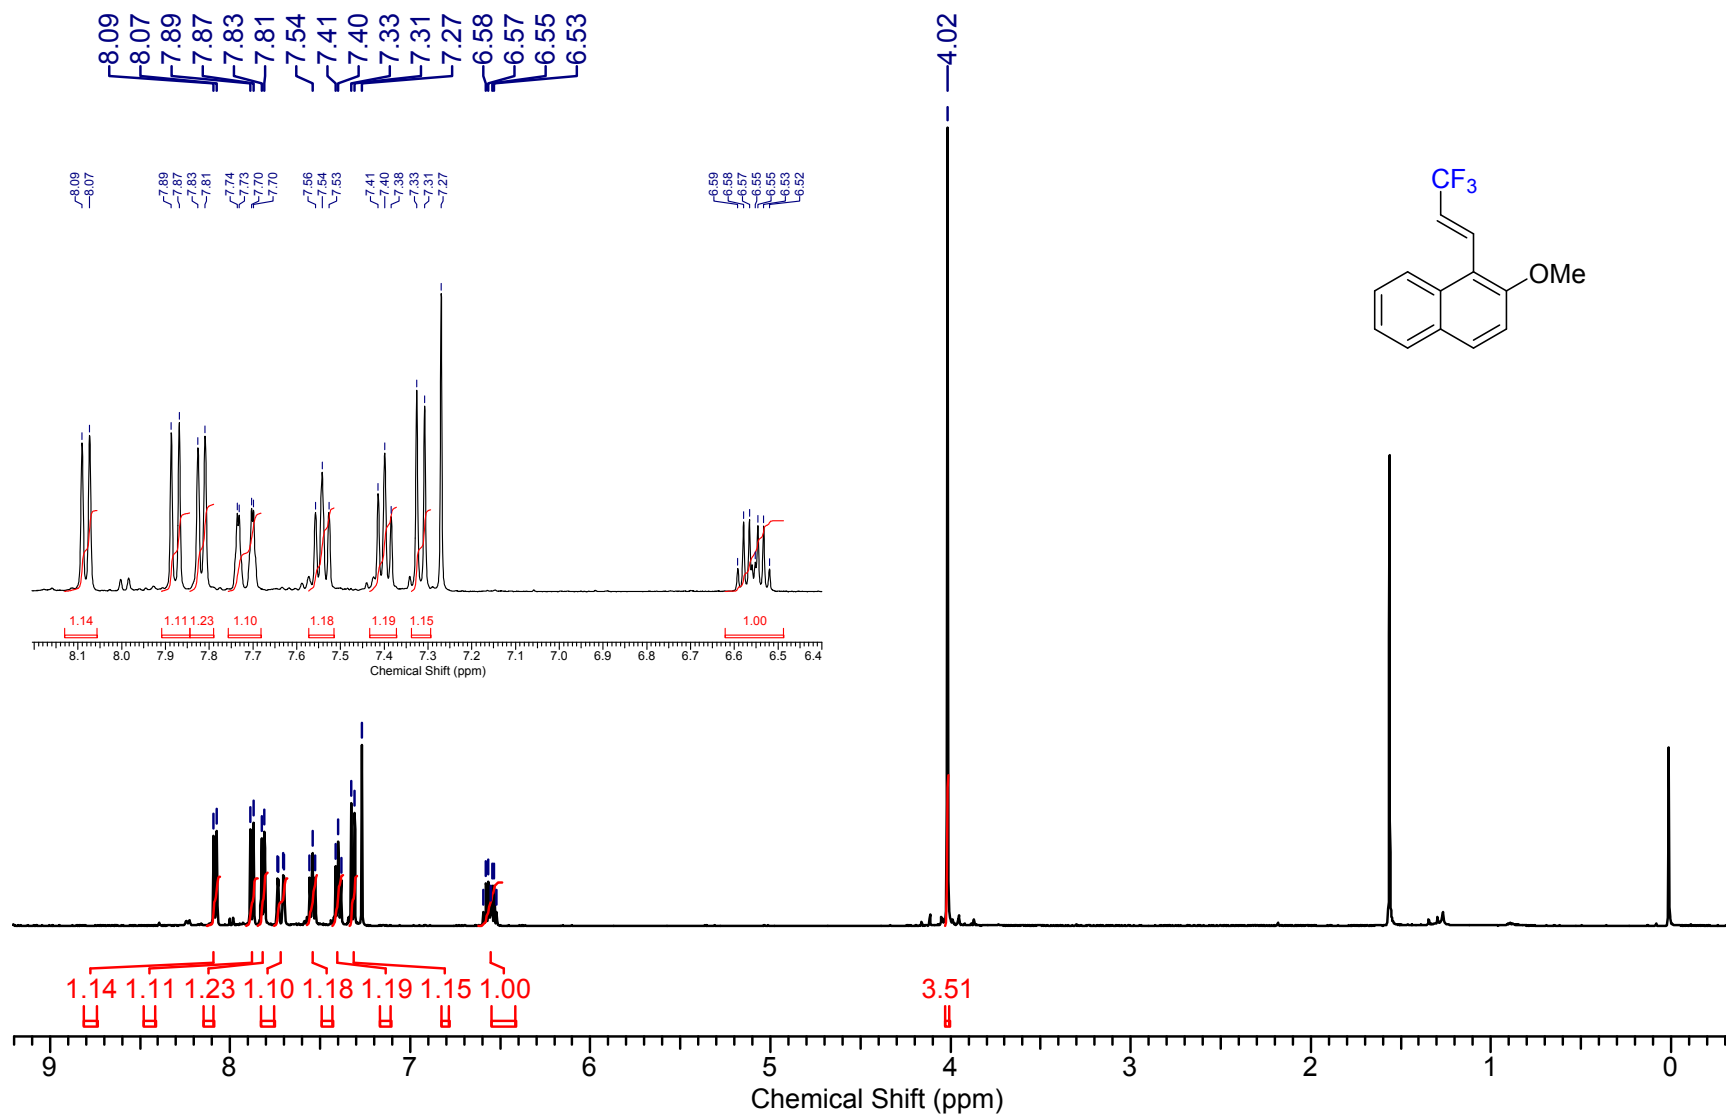

Figure S39a.  $^1\text{H}$  NMR of **3o**

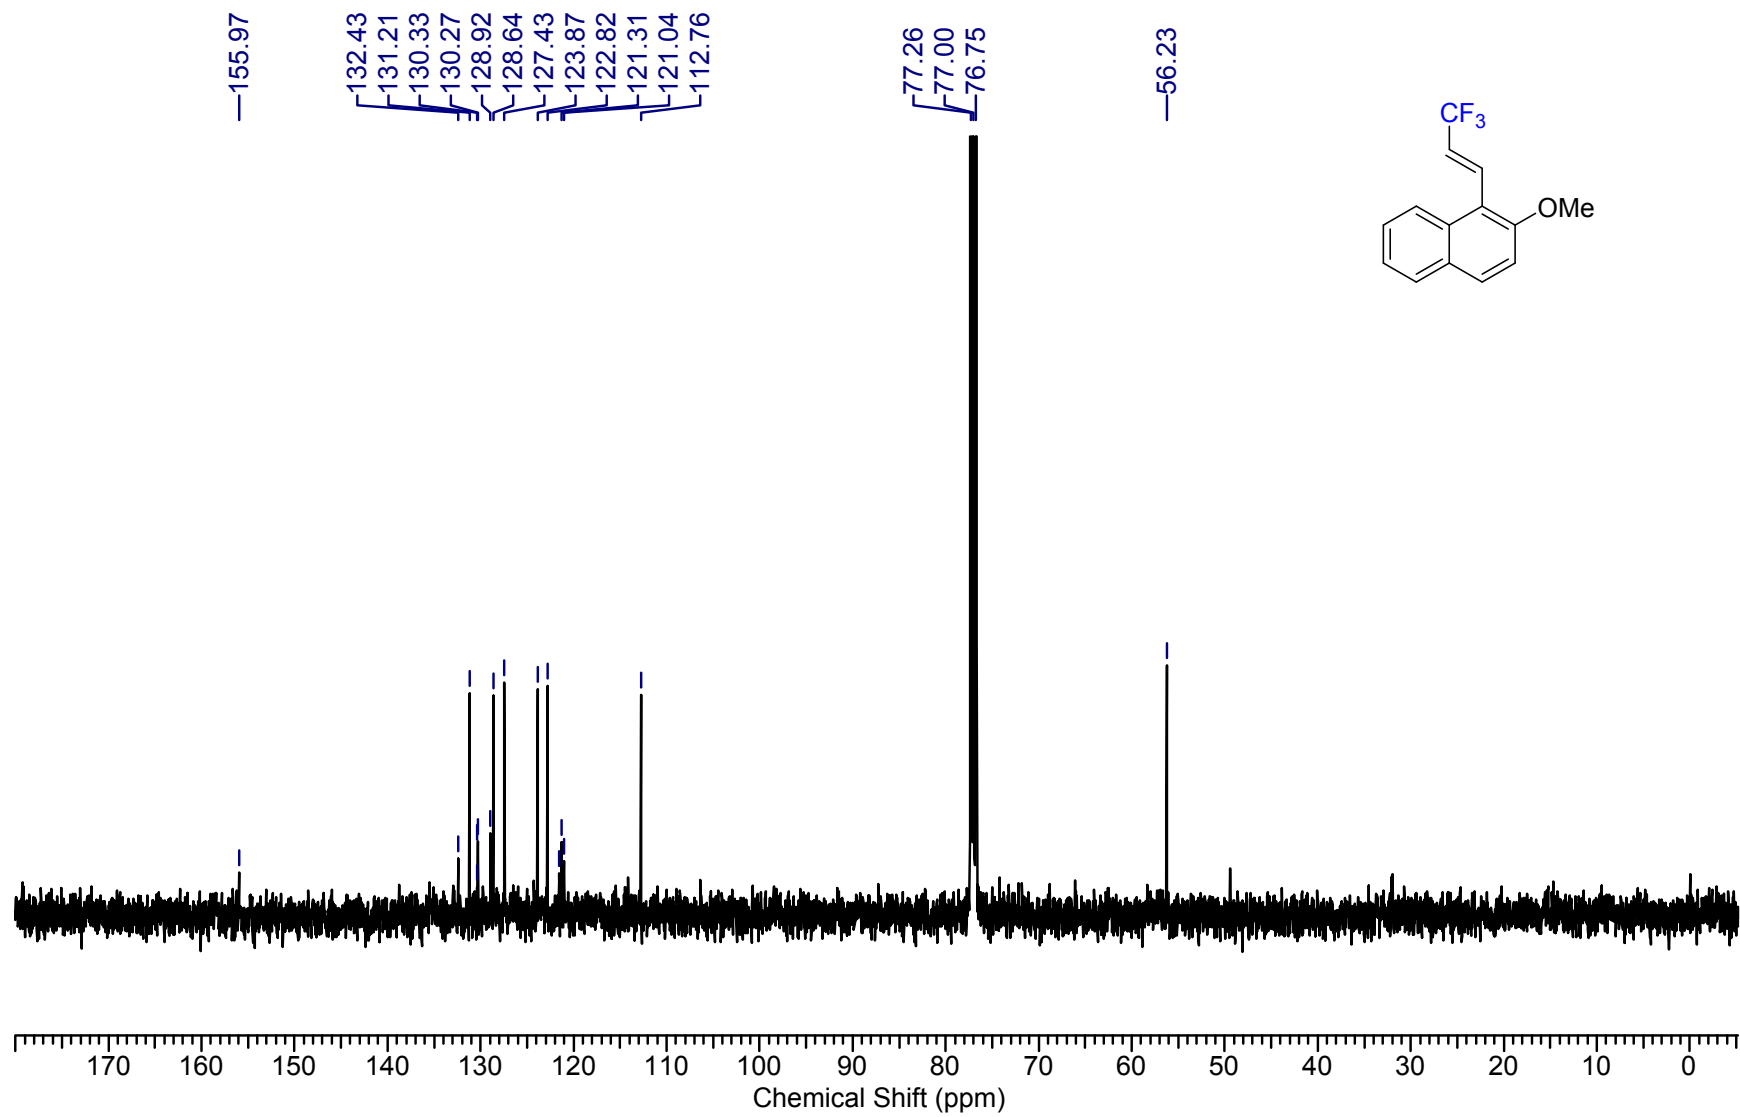

Figure S39b.  $^{13}\text{C}$  NMR of **3o**



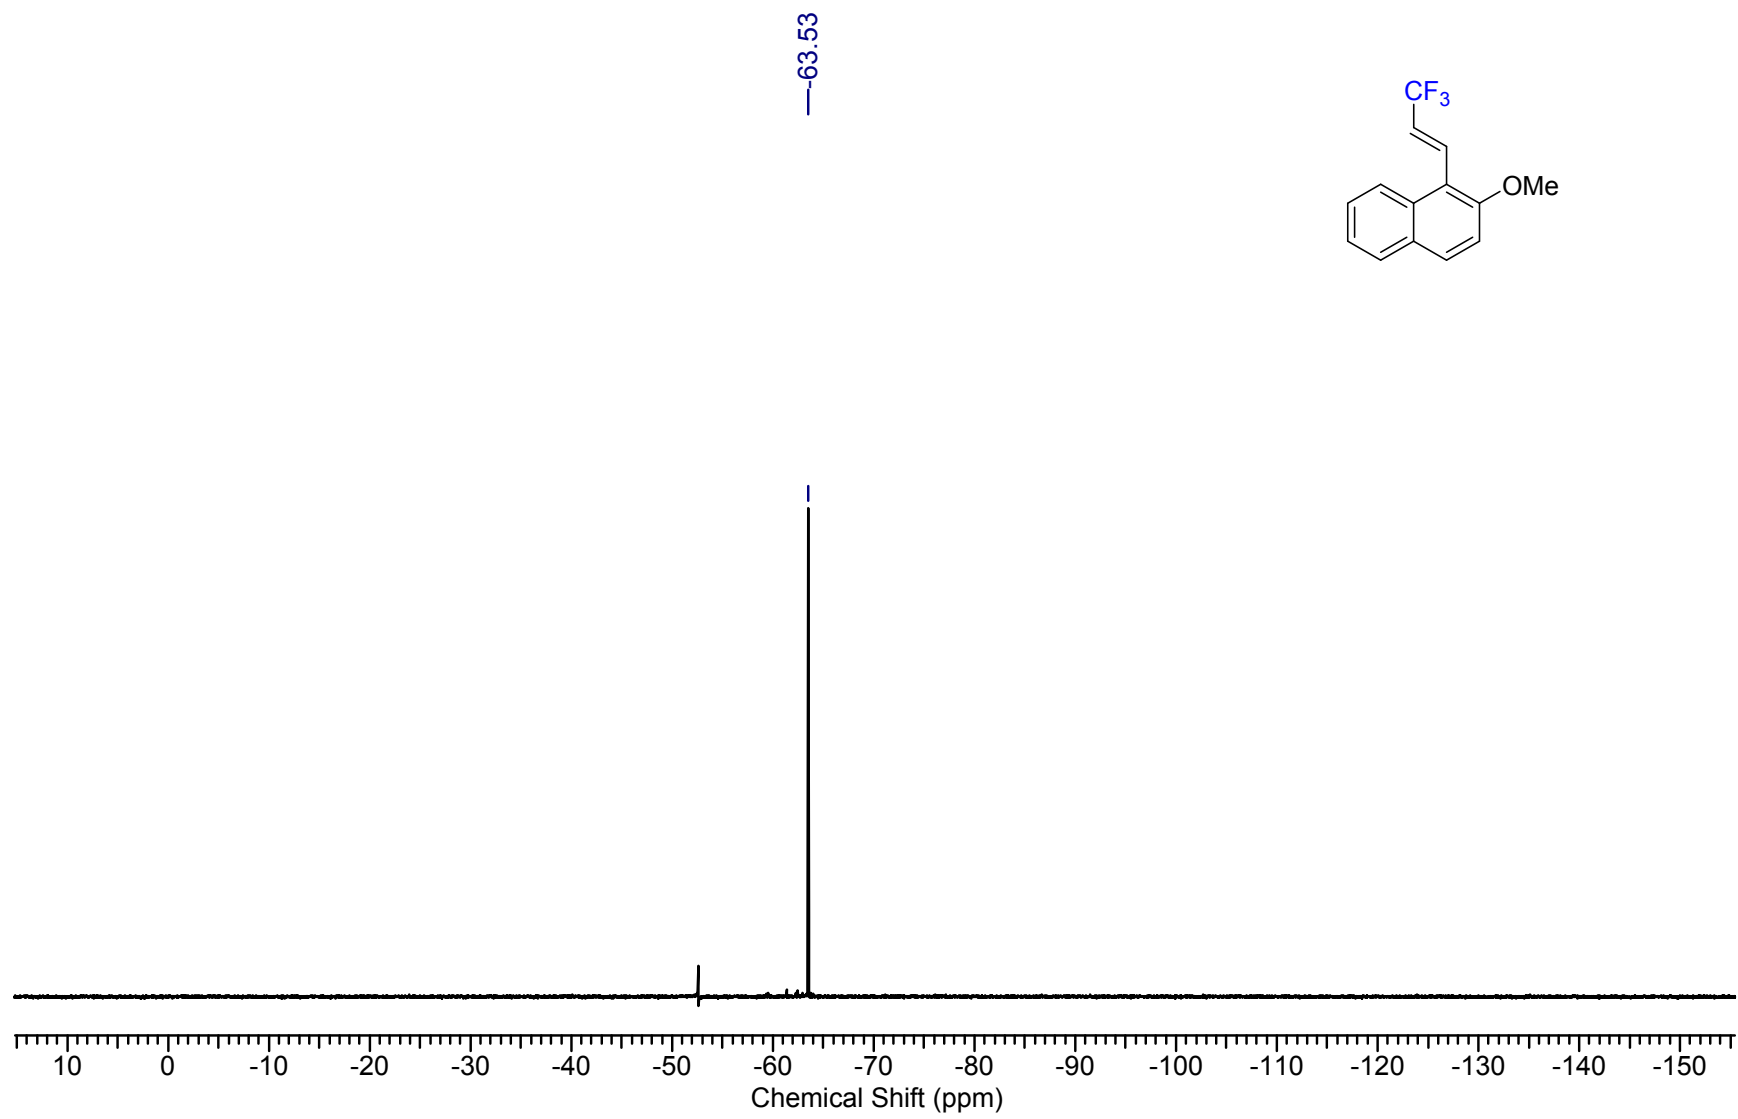

Figure S39c. <sup>19</sup>F NMR of **3o**

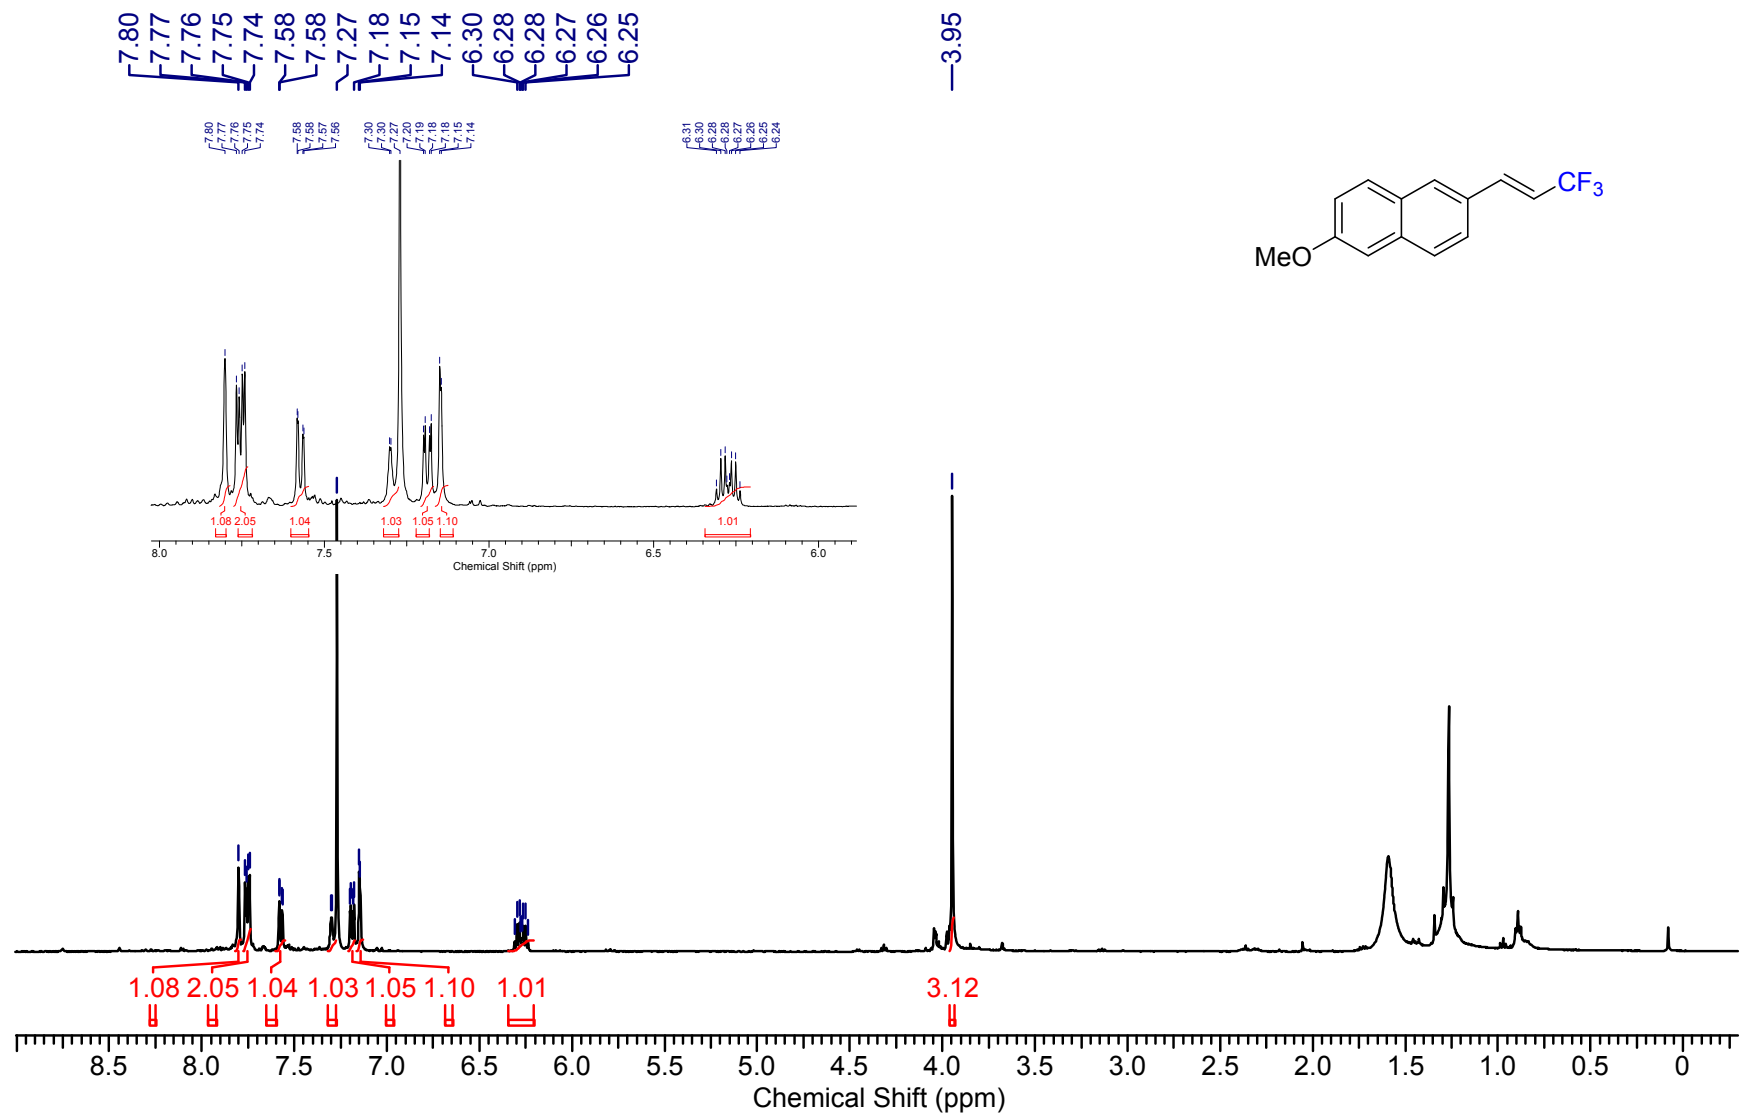

Figure S40a. <sup>1</sup>H NMR of 3p

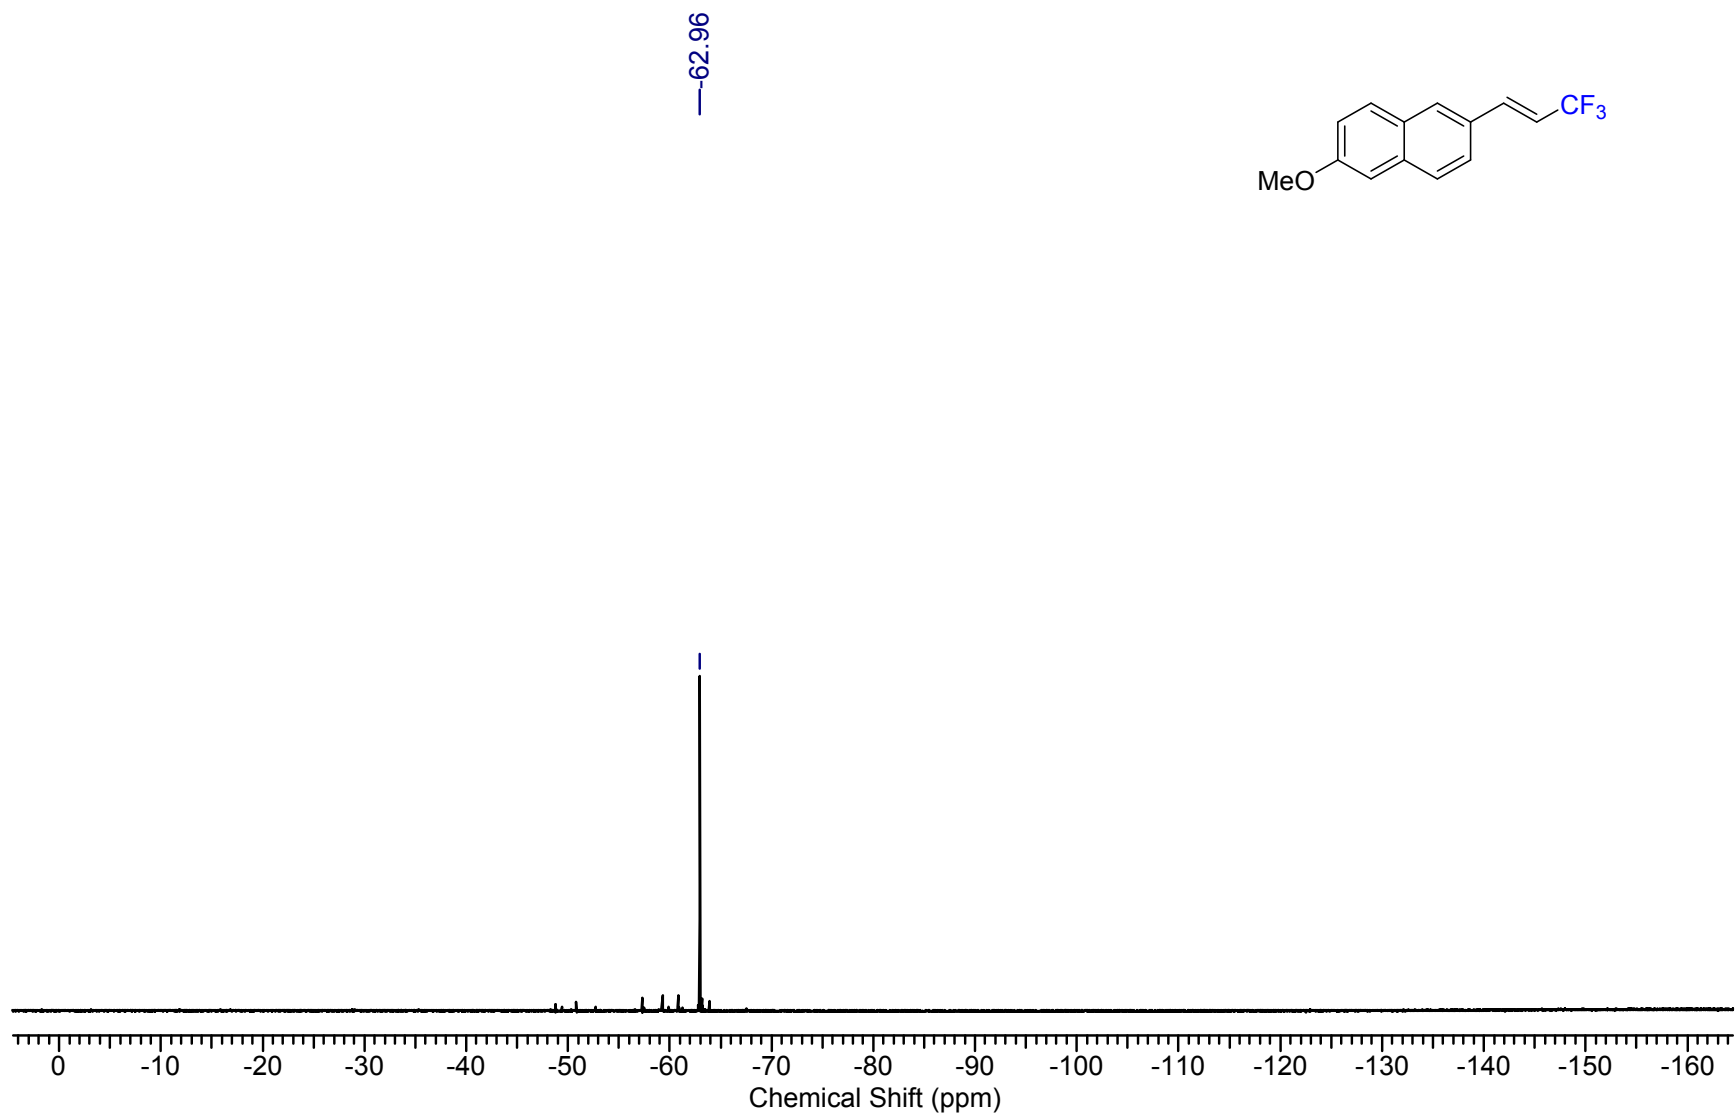

Figure S40b.  $^{19}\text{F}$  NMR of 3p

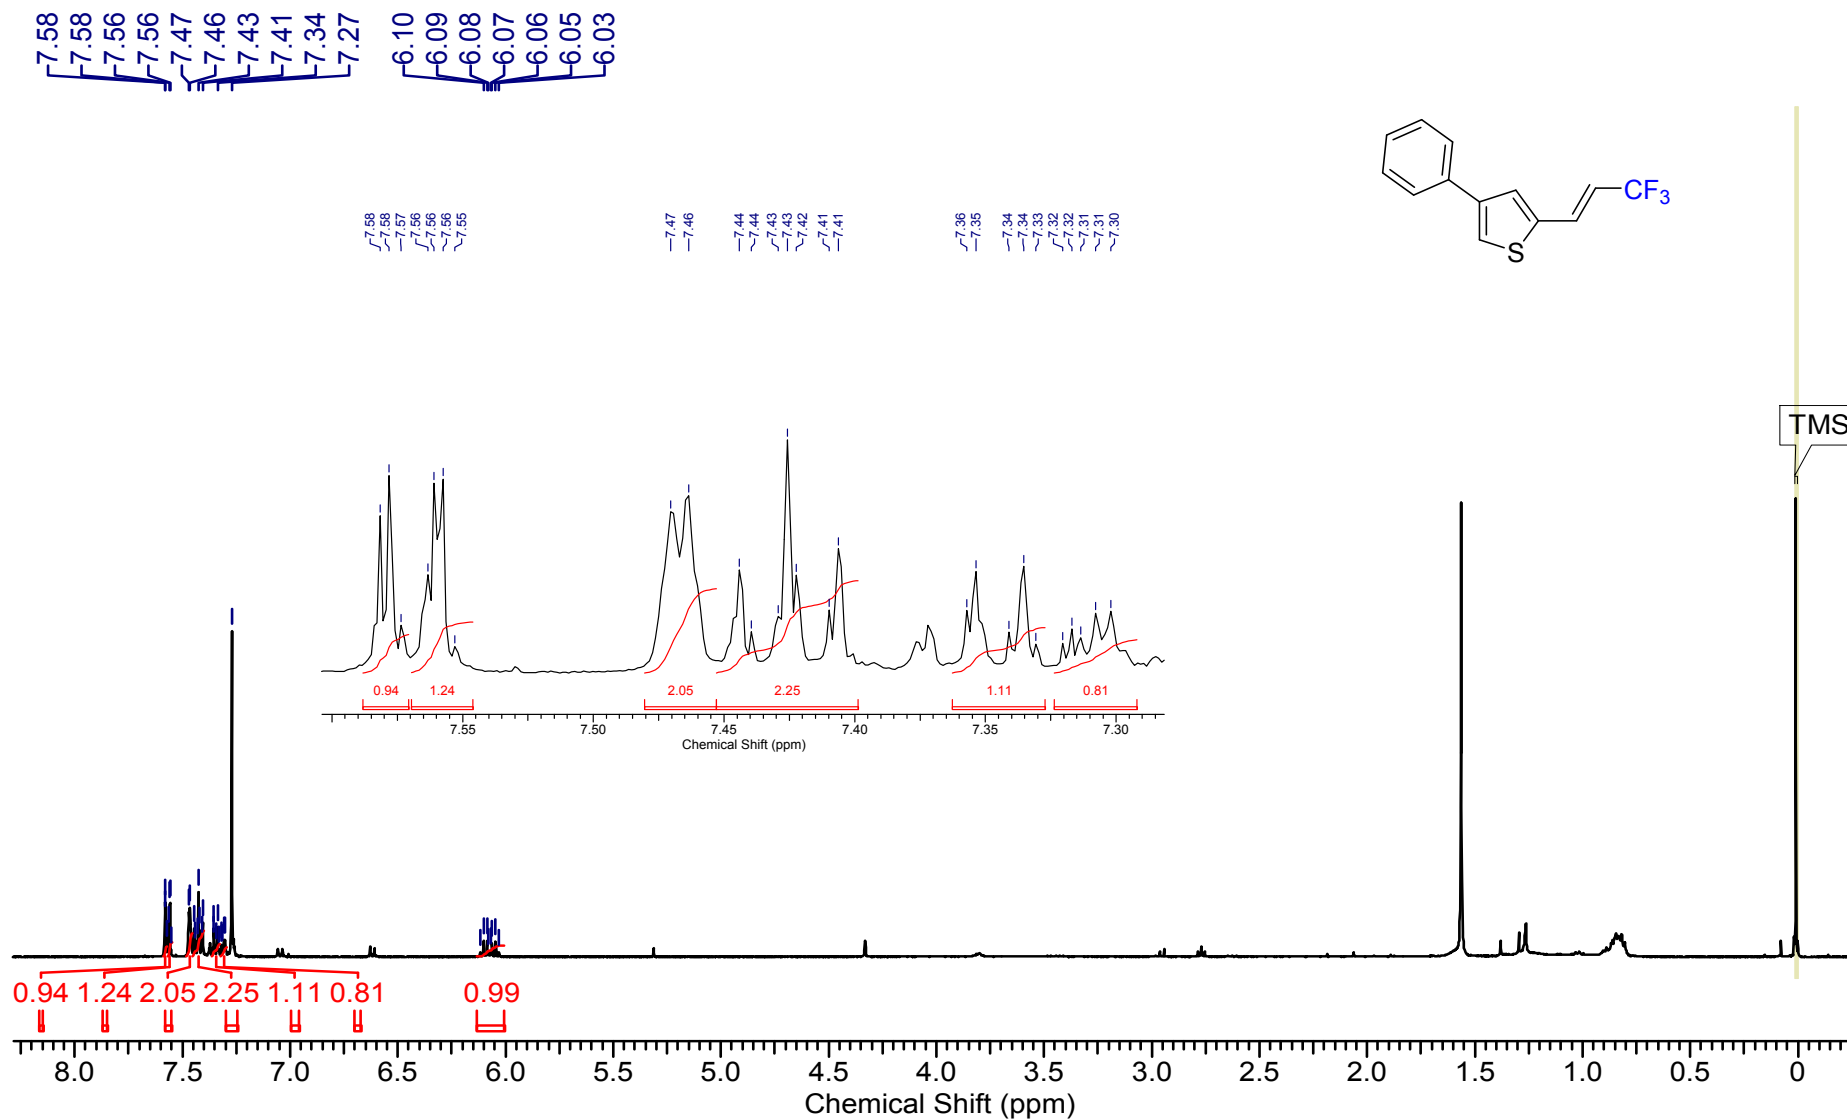

Figure S41a. <sup>1</sup>H NMR of 3r

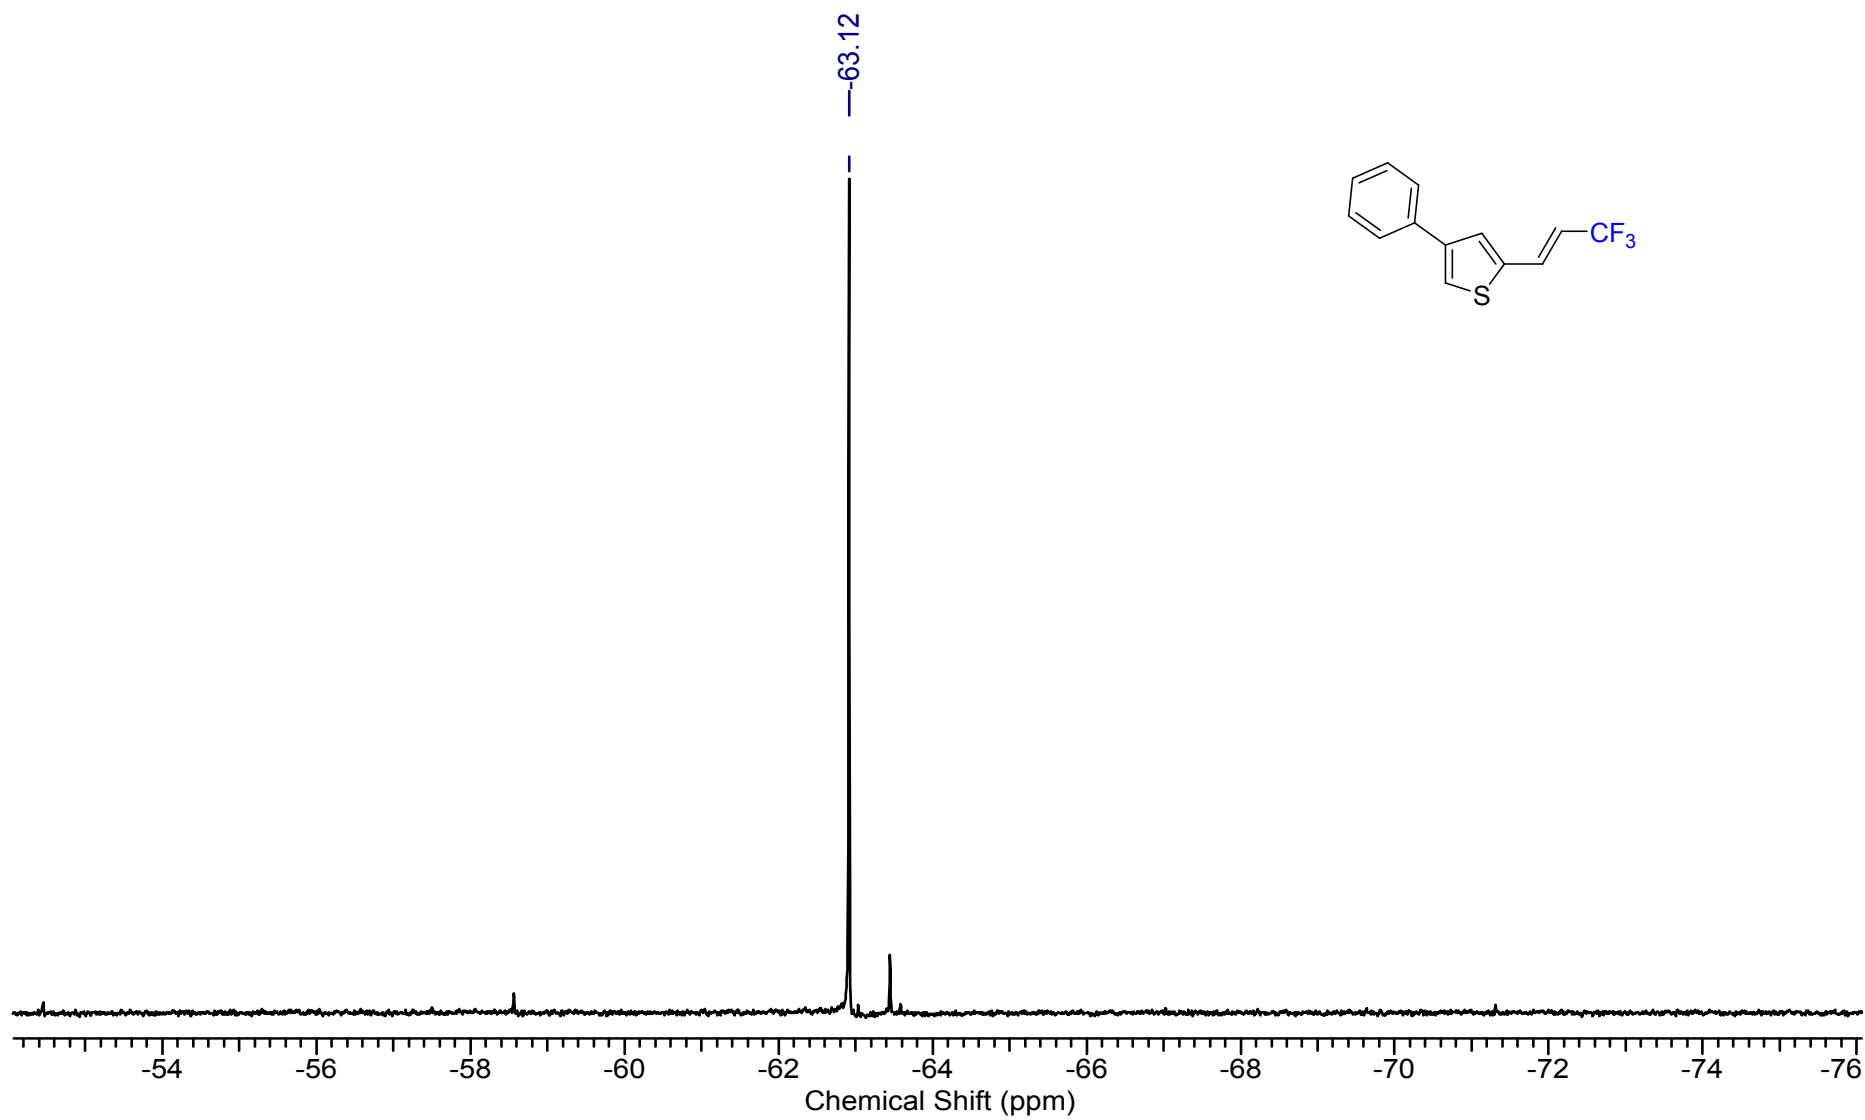

Figure S41b.  $^{19}\text{F}$  NMR of **3r**
